# Supplementary material for: Oxidative photocatalysis on membranes triggers non-canonical pyroptosis
Source: Research Square preprint supplement (doi:10.21203/rs.3.rs-3126446/v1), 2023-07-13
Supplement: Supplementary file 1 [file c2f7ae0af1680164ec4886f8.xlsx]

## Sheet: Fig. 1. c
	Photoinduced electron transfer at steady state (PL quench by water)
Wavelength (nm)	Acetonitrile 88% Water 12%	Acetonitrile 90% Water 10%	Acetonitrile 92% Water 8%	Acetonitrile 94% Water 6%	Acetonitrile 96% Water 4%	Acetonitrile 98% Water 2%	Acetonitrile 100%		[BTP] = 20 μM
520	4664	14471.2	4313.6	4362.4	5542.4	6012.8	10392.8
521	4664	13771.2	4293.6	4402.4	5002.4	6552.8	10212.8
522	4684	14011.2	4393.6	4382.4	5342.4	6832.8	10012.8
523	4464	13051.2	4213.6	4182.4	5242.4	6452.8	10632.8
524	4424	13131.2	4293.6	4302.4	5462.4	7152.8	10132.8
525	4404	12571.2	3933.6	4642.4	5402.4	6612.8	10852.8
526	4444	12911.2	4613.6	4962.4	5322.4	7232.8	10492.8
527	4544	11691.2	4473.6	4442.4	5442.4	6952.8	10652.8
528	4424	12351.2	4293.6	4442.4	5642.4	7872.8	11192.8
529	4184	11891.2	3993.6	4742.4	5642.4	7492.8	11332.8
530	4124	11391.2	4093.6	4822.4	5802.4	7572.8	10912.8
531	4444	11891.2	3773.6	4342.4	6142.4	7892.8	11872.8
532	4044	11451.2	3853.6	4642.4	6102.4	8552.8	11432.8
533	4084	11431.2	4333.6	4962.4	5842.4	8632.8	12292.8
534	4124	11171.2	4293.6	4802.4	6382.4	8772.8	13112.8
535	4084	10591.2	4273.6	4762.4	6942.4	9052.8	13552.8
536	4204	10911.2	4793.6	5022.4	6922.4	9712.8	13852.8
537	4064	10791.2	4293.6	5022.4	7662.4	10392.8	14952.8
538	4064	10231.2	4293.6	5142.4	7182.4	11132.8	15972.8
539	4504	10931.2	4713.6	4902.4	7862.4	11712.8	16232.8
540	4384	11071.2	4873.6	5542.4	8222.4	12992.8	18372.8
541	4344	10651.2	4793.6	5042.4	8922.4	13332.8	19392.8
542	4244	10431.2	5353.6	5362.4	9522.4	13852.8	20792.8
543	4404	10531.2	4673.6	6122.4	9922.4	14992.8	20412.8
544	4024	10611.2	4893.6	6202.4	9882.4	16232.8	22452.8
545	4924	10411.2	5273.6	6202.4	10522.4	16512.8	23392.8
546	4584	10911.2	5273.6	6662.4	10862.4	17692.8	25432.8
547	4304	10271.2	5593.6	6482.4	11942.4	19412.8	27632.8
548	4864	10711.2	5873.6	6542.4	12182.4	20132.8	28672.8
549	5184	10351.2	5813.6	7442.4	12782.4	21592.8	31132.8
550	4924	10531.2	6073.6	7462.4	13822.4	23332.8	33912.8
551	4864	10911.2	6133.6	8422.4	15282.4	25052.8	35892.8
552	5024	10451.2	6473.6	8622.4	15222.4	26212.8	38392.8
553	5324	10411.2	6773.6	8702.4	16442.4	27792.8	41272.8
554	5744	11131.2	6673.6	9142.4	16902.4	30112.8	44992.8
555	5704	10751.2	6913.6	9262.4	18102.4	32052.8	47632.8
556	5524	10411.2	7113.6	10002.4	18502.4	34312.8	50792.8
557	5944	10931.2	7133.6	10242.4	20742.4	36452.8	55072.8
558	5924	10311.2	8273.6	10702.4	20962.4	39172.8	57992.8
559	6164	11171.2	8353.6	11122.4	22182.4	41732.8	60952.8
560	5964	10831.2	8513.6	11682.4	23722.4	43732.8	66592.8
561	6944	11691.2	9153.6	12162.4	24662.4	47272.8	70672.8
562	6844	11071.2	9053.6	12582.4	26142.4	50092.8	74152.8
563	7304	11731.2	9793.6	13202.4	27622.4	53812.8	80192.8
564	6924	11611.2	10353.6	13922.4	29462.4	56132.8	84232.8
565	7184	12371.2	9913.6	14162.4	30202.4	60692.8	91372.8
566	7424	12571.2	10853.6	15102.4	33102.4	63892.8	97592.8
567	7644	12791.2	11073.6	16022.4	34282.4	67652.8	103233
568	8004	12811.2	11613.6	16362.4	36222.4	70812.8	110493
569	7964	12851.2	11973.6	16902.4	38022.4	74012.8	115653
570	8464	12891.2	12053.6	17522.4	39322.4	80532.8	124153
571	8744	13291.2	13433.6	18162.4	42222.4	84632.8	130693
572	9044	13351.2	13873.6	19542.4	43822.4	88352.8	139273
573	9384	14071.2	14753.6	20302.4	45502.4	95032.8	147373
574	9664	13651.2	15393.6	21302.4	47882.4	98992.8	155513
575	9704	15031.2	16193.6	22042.4	49102.4	102753	163593
576	10264	14871.2	16273.6	22682.4	52602.4	110693	173553
577	10924	15271.2	17333.6	23762.4	54942.4	114593	179153
578	11224	15571.2	17973.6	24002.4	57722.4	121873	191773
579	11904	15811.2	18073.6	25542.4	59962.4	127433	201853
580	12064	16571.2	18433.6	25782.4	63462.4	132233	211493
581	12704	16611.2	19753.6	28242.4	65702.4	139993	223033
582	13164	17711.2	20153.6	28442.4	68322.4	146013	231953
583	13344	18211.2	20653.6	29362.4	70902.4	153273	242153
584	13844	18211.2	21093.6	31182.4	75442.4	158093	254113
585	13944	18731.2	22033.6	32242.4	77062.4	168413	266633
586	14084	19911.2	22933.6	33802.4	82042.4	175133	278213
587	15584	19811.2	23793.6	34862.4	85462.4	184073	291353
588	15104	20051.2	24253.6	36282.4	88522.4	189833	302413
589	16124	21051.2	25733.6	37422.4	90642.4	197693	316673
590	16564	22511.2	26993.6	39242.4	95142.4	204613	331173
591	17664	22371.2	27633.6	40142.4	97662.4	214393	343733
592	18344	22631.2	27893.6	42002.4	100162	221233	357493
593	18264	22651.2	29193.6	43262.4	104122	231593	370173
594	19104	23751.2	29433.6	44582.4	108662	239233	385433
595	19804	25011.2	31113.6	44962.4	111662	249033	398593
596	20484	25391.2	32193.6	46922.4	116962	255473	413953
597	20404	25991.2	32513.6	48462.4	120462	264173	429573
598	21004	26271.2	33973.6	50542.4	122702	274933	444033
599	22464	28011.2	35533.6	52182.4	126182	283473	457273
600	22924	28411.2	36053.6	52642.4	130482	292113	471993
601	23124	29151.2	36413.6	54002.4	134322	300973	486473
602	24064	30431.2	38653.6	55902.4	140562	310513	502973
603	24104	30511.2	39013.6	56662.4	142982	317113	517933
604	25464	30771.2	40673.6	59722.4	147922	328773	533133
605	26524	31371.2	41113.6	60782.4	149302	339953	547833
606	27044	32191.2	43113.6	62942.4	156442	351333	562293
607	27724	33231.2	43893.6	64722.4	159842	358413	578553
608	28404	32891.2	44233.6	66062.4	162442	366353	588893
609	29104	34291.2	45433.6	66522.4	166502	374753	602233
610	29104	35951.2	45993.6	70022.4	171362	385573	616713
611	30324	36571.2	49073.6	72382.4	175082	394373	632713
612	30764	37551.2	49573.6	73802.4	179822	401953	646493
613	31444	37511.2	49853.6	75202.4	181402	410453	658113
614	31604	37991.2	52353.6	77602.4	187662	419973	674473
615	33124	39711.2	52613.6	77482.4	189422	427533	683333
616	34204	40811.2	52893.6	80902.4	197382	436553	698173
617	34244	41251.2	55693.6	81882.4	196062	447353	711233
618	34684	41231.2	55613.6	82582.4	201002	448353	723593
619	36304	42431.2	56813.6	83302.4	205222	458313	734233
620	35884	43311.2	59093.6	85162.4	209082	471013	745353
621	37424	44491.2	58233.6	87302.4	214042	477013	757333
622	36924	44331.2	59333.6	88062.4	215282	486513	768773
623	37504	45351.2	60753.6	91462.4	220342	495153	780533
624	39844	46791.2	60933.6	91982.4	220042	492593	792733
625	39284	47711.2	63253.6	92642.4	226962	504493	795633
626	40724	47871.2	65233.6	94922.4	229802	512493	809853
627	41644	48691.2	65293.6	96102.4	236062	515893	814733
628	41504	48751.2	66933.6	96582.4	234502	520193	825433
629	42644	49571.2	67993.6	98682.4	235962	521473	831313
630	43084	49951.2	69013.6	100882	239582	532953	844513
631	44364	49691.2	68713.6	101142	240122	538293	845913
632	43324	51091.2	69813.6	100442	246302	542293	853593
633	44604	52151.2	71193.6	103762	249502	546793	859273
634	45984	53791.2	71873.6	106462	252902	550373	861813
635	45804	53231.2	73573.6	107422	252502	552193	871333
636	45604	54731.2	74973.6	109042	253622	559813	881673
637	47564	55071.2	75053.6	108982	256442	566253	878793
638	48244	55911.2	75893.6	110262	257702	566173	885233
639	48664	56871.2	76633.6	111582	260722	567293	882413
640	49004	57851.2	77213.6	113542	260962	574633	889013
641	48664	56831.2	77293.6	113942	266682	577673	894973
642	49204	57911.2	79153.6	114802	265382	580173	899333
643	50104	59691.2	80633.6	116322	267102	581473	897713
644	51564	59811.2	81333.6	116762	265982	583633	901393
645	50324	58991.2	82473.6	120082	268502	585153	902153
646	52324	60991.2	81173.6	120182	272102	586553	897433
647	52464	60011.2	81953.6	119742	275182	584893	900573
648	52844	60431.2	83613.6	119862	272102	586333	900493
649	52484	60811.2	85053.6	121322	275082	589873	898233
650	52764	61831.2	83953.6	122782	274542	586973	898953
651	53164	62151.2	83493.6	121942	275482	587393	900953
652	53124	63031.2	85113.6	124982	275902	589633	900853
653	53864	63731.2	84813.6	124542	277842	589433	896413
654	55184	63291.2	86113.6	126042	278142	585833	892113
655	55564	62511.2	86873.6	123422	280502	588333	887393
656	55384	62411.2	86853.6	125482	278962	585353	888273
657	55064	63851.2	87773.6	126642	279162	583553	876773
658	55984	64151.2	88113.6	127202	277502	582413	880013
659	54744	64051.2	86693.6	127482	276642	584113	878493
660	55964	65251.2	87753.6	126102	276182	578753	866153
661	56404	64851.2	87953.6	128122	274442	577273	866933
662	57104	64591.2	88193.6	126802	274422	578073	860873
663	57744	65151.2	88873.6	128162	275482	575533	859493
664	56604	65511.2	89213.6	130122	276202	573693	851453
665	56664	65011.2	88373.6	129082	274322	568573	844733
666	56344	66231.2	89253.6	128982	273942	566153	838273
667	56584	66411.2	88933.6	127482	273722	562273	831493
668	56304	65471.2	90893.6	129682	273322	563793	825773
669	56824	65671.2	89693.6	127782	271542	556253	817393
670	57004	65491.2	90253.6	127202	271362	555493	815373
671	56724	65991.2	89773.6	128922	269122	549993	808293
672	56264	66131.2	87913.6	127382	269782	550613	798573
673	56924	65171.2	88473.6	127642	268502	541353	790353
674	57664	65671.2	89193.6	129862	266422	534733	783933
675	57364	65691.2	89953.6	128382	265902	534973	776193
676	56484	66171.2	88913.6	126562	264702	533253	764733
677	56384	65631.2	89793.6	127282	263062	528853	756233
678	56384	65391.2	88093.6	128542	262422	521193	753213
679	57004	64971.2	87173.6	125382	259342	517353	744193
680	56984	65891.2	88513.6	126342	256762	514453	739353
681	57644	64871.2	86913.6	127622	255902	507333	726333
682	55564	65131.2	87313.6	124562	256262	505573	724093
683	55564	64871.2	88553.6	126562	255122	499733	715413
684	55444	65131.2	88053.6	124542	249422	494893	703033
685	57164	63231.2	87273.6	126462	250522	491953	695213
686	55424	64671.2	87073.6	124962	248882	485633	687913
687	54924	63891.2	84593.6	123422	245962	479613	676813
688	55804	64271.2	85413.6	123282	245962	476193	668313
689	54344	63071.2	85353.6	122322	242962	471853	661753
690	54124	62811.2	84713.6	120622	239122	466933	651473
691	55064	64191.2	84653.6	121602	241522	460533	646093
692	53804	61431.2	84753.6	118202	238062	457453	631153
693	54644	61531.2	84293.6	119522	233582	448513	626113
694	54284	60771.2	82133.6	117302	233302	444793	616973
695	52124	61751.2	81573.6	116542	231242	439693	608493
696	52104	61791.2	82893.6	114722	227242	438153	603293
697	52184	61131.2	80813.6	116142	225782	428533	590673
698	52404	60251.2	81433.6	115822	225462	425493	582413
699	51764	60891.2	81453.6	114222	223182	417993	570353
700	51244	60011.2	79773.6	113522	220082	409893	564933
701	51384	59731.2	79833.6	112522	217162	410133	552953
702	50244	58531.2	78493.6	111002	214022	404793	546233
703	50504	57551.2	78193.6	110142	213362	397813	537393
704	50244	57331.2	77113.6	109902	210222	388833	529853
705	48944	57151.2	77573.6	108442	207802	385713	521033
706	49744	57551.2	76253.6	107802	206582	381753	508033
707	49264	55651.2	75913.6	107302	202642	377433	501933
708	48444	56551.2	74593.6	106702	202342	372633	493853
709	48144	56251.2	74133.6	104882	197902	368413	483493
710	47484	55631.2	73233.6	103882	197802	358033	475213
711	47004	54711.2	72833.6	102342	195722	354513	469413
712	48164	53991.2	72333.6	101762	192082	349473	459513
713	46724	52591.2	70253.6	100862	191862	344453	452493
714	46284	52651.2	71693.6	100902	186562	340053	442373
715	45184	51491.2	69253.6	100002	183042	333633	437353
716	44984	51571.2	68713.6	98162.4	184062	332093	428353
717	44144	51791.2	69553.6	96582.4	180802	325233	421113
718	44004	51851.2	67733.6	96922.4	178602	319793	412993
719	44264	50851.2	67213.6	95702.4	173482	314293	403633
720	44004	50371.2	67193.6	94702.4	173642	309853	393193
721	42984	49311.2	65873.6	92022.4	170422	305973	387253
722	41804	48851.2	64953.6	92482.4	167342	296953	383033
723	41584	48391.2	63153.6	91842.4	164862	290633	372813
724	40724	48051.2	63033.6	90542.4	163262	287013	367973
725	40564	47331.2	61773.6	87622.4	161382	283593	359273
726	40524	46191.2	61213.6	86842.4	157842	279973	351673
727	39264	45171.2	60733.6	87082.4	156762	272953	346013
728	39144	45891.2	59553.6	85802.4	154542	268413	340113
729	39064	45171.2	58173.6	84102.4	151882	264893	332413
730	38124	44531.2	58513.6	82482.4	149462	261353	325793
731	37664	43891.2	58873.6	82042.4	147582	256113	320133
732	37864	43911.2	56853.6	80482.4	144442	250053	312793
733	36264	43291.2	56273.6	79522.4	142742	247793	306093
734	36984	43071.2	56093.6	78262.4	141062	240653	298533
735	36604	41771.2	55553.6	77102.4	137602	239433	292813
736	35584	41331.2	55013.6	77082.4	137062	233333	287933
737	35444	41251.2	53153.6	76282.4	133182	228053	280333
738	35304	40931.2	52093.6	74202.4	132822	225433	274333
739	34424	39811.2	51633.6	74642.4	129482	220493	271373
740	34444	39371.2	51193.6	72502.4	127382	218453	262153
741	33504	39231.2	50613.6	70782.4	125902	213373	258453
742	33364	38071.2	49473.6	69922.4	124662	210613	252673
743	33184	37931.2	48593.6	68782.4	122862	205073	244553
744	32384	37431.2	48533.6	69722.4	120042	200793	242533
745	31584	37611.2	47753.6	68642.4	118202	197373	237333
746	30664	36551.2	47473.6	66542.4	115702	194813	231073
747	30164	36611.2	46233.6	64522.4	114602	191533	226153
748	30704	35491.2	46273.6	65102.4	112002	188733	220353
749	29704	34971.2	44873.6	64762.4	109862	182393	216553
750	28944	34591.2	44053.6	62322.4	106962	181813	211393
751	29004	33291.2	43713.6	61182.4	105862	175413	205193
752	28884	33491.2	43113.6	60242.4	106542	172373	202413
753	28844	33371.2	43713.6	60022.4	104022	170933	198553
754	27784	32411.2	41353.6	59502.4	101042	166513	192233
755	27464	31591.2	41433.6	58522.4	98342.4	164373	185573
756	27284	32451.2	41613.6	57822.4	97882.4	160693	184993
757	27204	31431.2	40433.6	55882.4	97862.4	157053	182173
758	26384	30651.2	39693.6	55742.4	94782.4	155493	175913
759	25824	30711.2	38933.6	54602.4	93062.4	152553	171413
760	25924	30431.2	38573.6	54122.4	91362.4	147753	169753
761	24884	29951.2	37593.6	52562.4	89522.4	145793	163593
762	25004	29591.2	37793.6	53982.4	87802.4	143033	163493
763	24204	29131.2	37553.6	52482.4	85922.4	140413	158173
764	23824	27991.2	36313.6	49302.4	86382.4	137513	153893
765	23484	27451.2	35073.6	49242.4	84542.4	134913	150633
766	24024	27391.2	35053.6	48702.4	83222.4	133253	146473
767	22704	27211.2	34553.6	47722.4	78702.4	128733	144933
768	22484	26471.2	33893.6	46522.4	80962.4	128433	140813
769	21924	26391.2	33013.6	46722.4	77182.4	124473	137253
770	22444	26631.2	32753.6	45942.4	76642.4	121473	133853
771	21424	25491.2	31973.6	44142.4	75862.4	120433	131113
772	21504	25831.2	31613.6	44702.4	73242.4	116293	126993
773	20824	25171.2	31173.6	44242.4	72862.4	115333	124973
774	19984	24751.2	30273.6	43222.4	72162.4	113593	122233
775	20144	23651.2	30573.6	41162.4	71262.4	110533	120533
776	20024	23551.2	29533.6	41182.4	69362.4	107773	116133
777	20024	23531.2	29513.6	40242.4	67622.4	104853	114553
778	19524	23671.2	29133.6	40322.4	66302.4	103073	112533
779	18884	23051.2	28633.6	39602.4	65542.4	102293	109433
780	19684	23011.2	27873.6	39302.4	64442.4	99192.8	106953
781	18204	21931.2	26913.6	37422.4	63242.4	99852.8	105133
782	17844	21711.2	27113.6	37042.4	61342.4	96692.8	100793
783	17204	21031.2	26193.6	36842.4	60182.4	93732.8	98992.8
784	17504	21131.2	26093.6	36862.4	59442.4	91372.8	96912.8
785	17464	20611.2	26153.6	35382.4	57382.4	90532.8	96132.8
786	17004	20991.2	24473.6	34822.4	57502.4	89192.8	92632.8
787	16704	20291.2	25313.6	34942.4	54842.4	85892.8	91612.8
788	16724	19391.2	23933.6	33782.4	55682.4	84712.8	89332.8
789	15864	19671.2	23853.6	33082.4	54722.4	85372.8	88512.8
790	15824	19291.2	24253.6	33302.4	55002.4	83072.8	85392.8
791	15864	19331.2	23793.6	32002.4	52802.4	83652.8	84312.8
792	15684	19231.2	23513.6	33062.4	53122.4	80452.8	81312.8
793	15484	19111.2	22773.6	31842.4	52162.4	79872.8	82632.8
794	15044	18731.2	22533.6	31542.4	52102.4	77952.8	80612.8
795	15204	19671.2	23113.6	32482.4	51142.4	78312.8	80432.8
796	15724	18071.2	22513.6	31102.4	51102.4	79092.8	77732.8
797	15604	18111.2	22433.6	31422.4	50162.4	77152.8	77072.8
798	15244	18351.2	22473.6	31062.4	50442.4	75652.8	76472.8
799	15044	18011.2	21653.6	30482.4	50182.4	75912.8	75352.8
800	14944	17771.2	21833.6	30522.4	49862.4	76312.8	75332.8

## Sheet: Fig. 1. d
	Hydrogen peroxide assau (DPD assay)
Time (minutes)	BTP+hv+ in Normoxic PBS		BTP+hv+ in DMSO		BTP+hv+PBS+Ar bubbled PBS
	1st	2nd	1st	2nd	1st	2nd
0	0.1004	0.0974	0.0849	0.0836	0.1006	0.1026
30	0.1161	0.1246	0.0858	0.0856	0.1291	0.1312
60	0.1243	0.1245	0.0852	0.0868	0.1511	0.1264
90	0.1295	0.1268	0.0868	0.0855	0.1854	0.1578
120	0.1359	0.1323	0.0866	0.0843	0.2066	0.1781
150	0.1443	0.1441	0.0892	0.0866	0.2415	0.2167
Normalization to 0 min
0	0	0	0	0	0	0
30	0.0157	0.0272	0.0009	0.002	0.0285	0.0286
60	0.0239	0.0271	0.0003	0.0032	0.0505	0.0238
90	0.0291	0.0294	0.0019	0.0019	0.0848	0.0552		P value (BTP+hv+ in Normoxic PBS vs BTP+hv+PBS+Ar bubbled PBS)
120	0.0355	0.0349	0.0017	0.0007	0.106	0.0755		0.0258284
150	0.0439	0.0467	0.0043	0.003	0.1409	0.1141
	BTP+hv+PBS		BTP+hv+DMSO		BTP+hv+PBS+Ar
Time	Average	STD	Average	STD	Average	STD
30	0.02145	0.00575	0.00145	0.00055	0.02855	5e-05
60	0.0255	0.0016	0.00175	0.00145	0.03715	0.01335
90	0.02925	0.00015	0.0019	6.93889e-18	0.07	0.0148
120	0.0352	0.0003	0.0012	0.0005	0.09075	0.01525
150	0.0453	0.0014	0.00365	0.00065	0.1275	0.0134

## Sheet: Fig. 1. e
	Hydroxyl radical assay (HPF assay)
			1st	2nd	3rd	Avr.	std.	P value (1 vs 3)	P value (1 vs 2)	P value (1 vs 11)
1	Ar bubbled PBS	BTP+hv+	1488.43	1308.38	1288.47	1361.76	110.146	0.000493628	3.13783e-05	2.5046e-07
2		BTP+hv-	37.162	36.387	37.492	37.0137	0.56724
3	Normoxic PBS	BTP+hv+	713.387	680.801	659.629	684.606	27.0802
4		BTP+hv-	30.942	24.924	19.476	25.114	5.73536
5	Ar bubbled DMSO 50% in PBS	BTP+hv+	223.234	228.818	222.942	224.998	3.31144
6		BTP+hv-	76.834	79.51		78.172	1.89222
7	Ar bubbled 100 uM KO2 in PBS	BTP-hv-	56.04	53.007	53.61	54.219	1.60559
8		BTP+hv+	3023.21	2832.54	2618.47	2824.74	202.479
9		BTP+hv-	42.568	44.044	46.358	44.3233	1.91038
10	Ar bubbled 23 mM H2O2 in PBS	BTP-hv-	37.718	34.948	34.59	35.752	1.71199
11		BTP+hv+	7729.16	7884.39	7959	7857.52	95.7365
12		BTP+hv-	33.188	35.774	37.591	35.5177	2.21266
13	Ar bubbled DMF	BTP+hv+	1.062	0.984	1.045	1.03033	0.04102
14		BTP+hv-	1.169	1.09	1.164	1.141	0.04424

## Sheet: Fig. 1. f
	Electron paramagnetic resonance (EPR) spectroscopy				** [BMPO] = 10 mM
Magnetic field (G)	1 mM BTP + 10 mM H2O2 + hv	1 mM BTP + 10 mM H2O2	10 mM H2O2 only	1 mM KO2	1 mM F2SO4 + 10 mM H2O2
3375	0.13528	0.1395	0.13592	0.18604	0.16524
3375.1	0.13531	0.13866	0.13526	0.18597	0.1664
3375.2	0.13501	0.13918	0.136	0.18574	0.16725
3375.3	0.13441	0.14172	0.13788	0.18529	0.16819
3375.4	0.13397	0.14367	0.1388	0.18482	0.17129
3375.5	0.13405	0.14405	0.1394	0.18457	0.17295
3375.6	0.13457	0.14263	0.13979	0.18459	0.17012
3375.7	0.13522	0.13998	0.13867	0.18494	0.16723
3375.8	0.13544	0.13841	0.13753	0.18512	0.16927
3375.9	0.13438	0.13838	0.13808	0.18441	0.17357
3376	0.13229	0.13874	0.13837	0.18329	0.17513
3376.1	0.13089	0.13942	0.13647	0.18282	0.17401
3376.2	0.13081	0.1405	0.1351	0.18305	0.17282
3376.3	0.13158	0.14096	0.13634	0.18342	0.17296
3376.4	0.13247	0.14042	0.13767	0.18321	0.17368
3376.5	0.13339	0.13954	0.13814	0.18223	0.17509
3376.6	0.13472	0.13891	0.13917	0.18109	0.17694
3376.7	0.13578	0.13897	0.14064	0.18075	0.17666
3376.8	0.13643	0.14014	0.14118	0.18139	0.17398
3376.9	0.13678	0.14177	0.13924	0.18199	0.17048
3377	0.13646	0.1418	0.13628	0.18246	0.16878
3377.1	0.13572	0.14018	0.13548	0.18274	0.16948
3377.2	0.13496	0.13873	0.13726	0.18202	0.16933
3377.3	0.13472	0.13826	0.13973	0.18084	0.16947
3377.4	0.13532	0.13803	0.13975	0.18035	0.17304
3377.5	0.13571	0.13827	0.13726	0.18072	0.1774
3377.6	0.13507	0.13984	0.13473	0.18088	0.17826
3377.7	0.13444	0.14087	0.13311	0.18052	0.17615
3377.8	0.13406	0.13982	0.13353	0.18055	0.1754
3377.9	0.1335	0.13825	0.13626	0.18119	0.17628
3378	0.13345	0.13821	0.13935	0.1818	0.17532
3378.1	0.13399	0.13949	0.14091	0.18184	0.17503
3378.2	0.13456	0.14053	0.14026	0.18174	0.17843
3378.3	0.13487	0.1405	0.13863	0.18227	0.18149
3378.4	0.1345	0.13982	0.13818	0.18321	0.18077
3378.5	0.13402	0.13936	0.13906	0.18386	0.17717
3378.6	0.13467	0.13898	0.14028	0.18432	0.17319
3378.7	0.1357	0.13816	0.14097	0.18443	0.17164
3378.8	0.13584	0.13757	0.1416	0.18377	0.1714
3378.9	0.13581	0.13796	0.14242	0.18329	0.16944
3379	0.1363	0.13847	0.14146	0.18357	0.16737
3379.1	0.13704	0.13867	0.13914	0.18393	0.16672
3379.2	0.13793	0.13914	0.13836	0.18399	0.1674
3379.3	0.13828	0.1399	0.13944	0.18392	0.16955
3379.4	0.13757	0.14011	0.1401	0.18408	0.17085
3379.5	0.13665	0.13987	0.13972	0.18451	0.17154
3379.6	0.13612	0.14021	0.13891	0.18458	0.17244
3379.7	0.13552	0.14034	0.13851	0.1838	0.17082
3379.8	0.13482	0.1393	0.13866	0.18301	0.16809
3379.9	0.13457	0.13777	0.13869	0.18268	0.16631
3380	0.13444	0.13679	0.13873	0.18195	0.1659
3380.1	0.13424	0.1366	0.13899	0.1811	0.16862
3380.2	0.13467	0.13662	0.13867	0.18128	0.17055
3380.3	0.13527	0.13674	0.13684	0.18243	0.16958
3380.4	0.13523	0.13706	0.13505	0.18381	0.17041
3380.5	0.13516	0.13687	0.1342	0.18453	0.17169
3380.6	0.13522	0.13527	0.13412	0.18423	0.16954
3380.7	0.13461	0.13309	0.13536	0.1834	0.16782
3380.8	0.13361	0.13251	0.13737	0.18309	0.16968
3380.9	0.1335	0.1341	0.1379	0.18403	0.17285
3381	0.13415	0.13594	0.13569	0.18498	0.17463
3381.1	0.13404	0.13732	0.1323	0.18477	0.17409
3381.2	0.13304	0.13964	0.13008	0.18415	0.17287
3381.3	0.13229	0.14248	0.12997	0.18364	0.17328
3381.4	0.13263	0.14388	0.13054	0.18311	0.17433
3381.5	0.13388	0.14377	0.13181	0.18321	0.17355
3381.6	0.1355	0.14336	0.13398	0.18392	0.17216
3381.7	0.13701	0.14284	0.13498	0.18437	0.17297
3381.8	0.1375	0.14229	0.13521	0.18445	0.17481
3381.9	0.13667	0.14128	0.13627	0.18424	0.17374
3382	0.13528	0.13968	0.13748	0.18397	0.17121
3382.1	0.1344	0.13849	0.13842	0.18358	0.17102
3382.2	0.13464	0.13781	0.13952	0.18258	0.17152
3382.3	0.13547	0.13774	0.14019	0.18171	0.171
3382.4	0.13601	0.13846	0.14008	0.18157	0.17056
3382.5	0.13615	0.13891	0.13927	0.18177	0.1708
3382.6	0.13612	0.13887	0.13795	0.18195	0.17275
3382.7	0.13565	0.13914	0.13739	0.18201	0.17494
3382.8	0.13465	0.13977	0.13793	0.18247	0.17325
3382.9	0.13396	0.14024	0.13844	0.18332	0.16806
3383	0.13423	0.14009	0.13839	0.18305	0.16305
3383.1	0.13503	0.13987	0.13827	0.18168	0.16153
3383.2	0.13531	0.13957	0.13906	0.18122	0.16511
3383.3	0.13475	0.13861	0.14055	0.1821	0.17101
3383.4	0.13449	0.13784	0.14051	0.18273	0.17555
3383.5	0.1349	0.13721	0.13816	0.18236	0.17716
3383.6	0.13516	0.13613	0.13661	0.18183	0.17584
3383.7	0.13533	0.13629	0.13735	0.18226	0.17479
3383.8	0.13504	0.13883	0.1383	0.18313	0.17513
3383.9	0.13415	0.14185	0.13834	0.18289	0.17426
3384	0.13361	0.1436	0.13817	0.18205	0.17166
3384.1	0.13386	0.14427	0.13888	0.18167	0.16933
3384.2	0.13512	0.1436	0.14009	0.18156	0.16995
3384.3	0.13639	0.14166	0.14046	0.18153	0.17104
3384.4	0.13629	0.1401	0.14088	0.18166	0.16902
3384.5	0.13523	0.13952	0.1426	0.18153	0.16715
3384.6	0.13402	0.13932	0.14404	0.18088	0.16729
3384.7	0.13309	0.13958	0.1439	0.18032	0.16805
3384.8	0.13297	0.14021	0.14335	0.1801	0.17027
3384.9	0.13337	0.14088	0.14323	0.1798	0.17205
3385	0.1329	0.14162	0.14218	0.17957	0.17047
3385.1	0.13154	0.1417	0.13952	0.17999	0.16627
3385.2	0.13109	0.14106	0.13736	0.18104	0.16211
3385.3	0.13195	0.14023	0.13715	0.18243	0.1613
3385.4	0.13299	0.13901	0.13749	0.18357	0.16394
3385.5	0.13379	0.13785	0.13735	0.18369	0.16787
3385.6	0.13461	0.13693	0.13778	0.18283	0.17003
3385.7	0.13547	0.13606	0.13864	0.18199	0.16828
3385.8	0.13613	0.13515	0.13867	0.18199	0.16393
3385.9	0.13649	0.1345	0.1384	0.18192	0.15966
3386	0.13611	0.13465	0.13824	0.18098	0.15778
3386.1	0.13475	0.13517	0.13763	0.17988	0.15901
3386.2	0.1342	0.1355	0.13757	0.17919	0.16232
3386.3	0.1352	0.1356	0.13923	0.17959	0.16481
3386.4	0.13575	0.13593	0.14114	0.18132	0.1652
3386.5	0.13519	0.13666	0.14117	0.18355	0.16556
3386.6	0.13415	0.13695	0.14014	0.185	0.16635
3386.7	0.13296	0.13671	0.1402	0.18504	0.16619
3386.8	0.13232	0.13716	0.14161	0.18423	0.16626
3386.9	0.13303	0.13805	0.1431	0.18322	0.16846
3387	0.13449	0.13811	0.14333	0.18226	0.17134
3387.1	0.13541	0.13825	0.14271	0.18138	0.17195
3387.2	0.13564	0.13945	0.1413	0.18054	0.1709
3387.3	0.13554	0.14072	0.13864	0.17963	0.1696
3387.4	0.13566	0.14099	0.13671	0.17889	0.16791
3387.5	0.13578	0.13968	0.13693	0.17843	0.16722
3387.6	0.13514	0.13757	0.13851	0.17784	0.16924
3387.7	0.13437	0.13659	0.14039	0.17744	0.17416
3387.8	0.13428	0.13676	0.14167	0.17753	0.17739
3387.9	0.13452	0.13794	0.14232	0.17743	0.17534
3388	0.13449	0.14046	0.14286	0.17676	0.17156
3388.1	0.13463	0.14275	0.14273	0.17641	0.17029
3388.2	0.13522	0.14324	0.14068	0.17709	0.17162
3388.3	0.13568	0.14265	0.13739	0.17802	0.17276
3388.4	0.13595	0.14237	0.1352	0.17892	0.17316
3388.5	0.13633	0.14241	0.13415	0.18011	0.17291
3388.6	0.13689	0.14213	0.13322	0.18085	0.17179
3388.7	0.137	0.14123	0.13328	0.18091	0.1708
3388.8	0.13673	0.14051	0.1351	0.18106	0.16812
3388.9	0.13744	0.14051	0.13743	0.18101	0.16332
3389	0.13882	0.14109	0.13859	0.18068	0.16019
3389.1	0.13923	0.14223	0.13916	0.18077	0.16029
3389.2	0.1389	0.14226	0.14013	0.18105	0.16178
3389.3	0.13864	0.14008	0.14092	0.1809	0.16344
3389.4	0.13832	0.13775	0.14113	0.1803	0.16526
3389.5	0.13838	0.13707	0.14097	0.17966	0.16747
3389.6	0.1389	0.13735	0.14024	0.17978	0.16883
3389.7	0.13926	0.13766	0.13924	0.18046	0.16728
3389.8	0.13906	0.1385	0.13966	0.18087	0.16385
3389.9	0.13791	0.13986	0.14194	0.18154	0.16102
3390	0.13685	0.14107	0.14314	0.18239	0.15967
3390.1	0.13729	0.14225	0.14197	0.18263	0.15933
3390.2	0.13838	0.14338	0.14023	0.18275	0.16069
3390.3	0.13884	0.14365	0.13894	0.18304	0.1635
3390.4	0.13881	0.14319	0.13822	0.18344	0.165
3390.5	0.13892	0.14256	0.13746	0.18393	0.16426
3390.6	0.13904	0.14173	0.13598	0.18433	0.16379
3390.7	0.13839	0.14147	0.13513	0.18413	0.16838
3390.8	0.137	0.14217	0.13732	0.18336	0.17508
3390.9	0.13576	0.14298	0.14188	0.18312	0.17495
3391	0.13536	0.14286	0.14579	0.18317	0.16907
3391.1	0.1358	0.14115	0.14786	0.18237	0.16483
3391.2	0.13631	0.13945	0.14857	0.18177	0.16434
3391.3	0.13673	0.13928	0.14776	0.18253	0.16528
3391.4	0.13743	0.13925	0.14574	0.18324	0.16735
3391.5	0.13755	0.13848	0.14314	0.18299	0.17068
3391.6	0.13651	0.13729	0.14036	0.18255	0.17314
3391.7	0.13535	0.13608	0.13872	0.18196	0.17368
3391.8	0.13491	0.1358	0.13664	0.18118	0.1724
3391.9	0.1343	0.13595	0.13286	0.18098	0.17011
3392	0.13305	0.13567	0.13077	0.18169	0.16802
3392.1	0.13279	0.1357	0.13089	0.18225	0.16686
3392.2	0.13408	0.13642	0.13071	0.1818	0.16555
3392.3	0.13484	0.13784	0.13178	0.18078	0.16458
3392.4	0.13397	0.13956	0.1354	0.17973	0.16569
3392.5	0.13356	0.14017	0.13877	0.17955	0.16715
3392.6	0.13457	0.13955	0.13988	0.18022	0.16931
3392.7	0.13506	0.13898	0.1395	0.1808	0.17163
3392.8	0.13449	0.13889	0.13942	0.18084	0.17086
3392.9	0.13484	0.13899	0.14009	0.18038	0.16922
3393	0.13621	0.13888	0.14021	0.17986	0.16791
3393.1	0.13631	0.13832	0.1388	0.17914	0.16481
3393.2	0.13499	0.13784	0.13671	0.17819	0.16142
3393.3	0.13418	0.13842	0.13566	0.17794	0.1603
3393.4	0.13412	0.14041	0.13563	0.1793	0.16191
3393.5	0.1336	0.14254	0.13569	0.18161	0.16495
3393.6	0.1325	0.1431	0.13589	0.18327	0.167
3393.7	0.13199	0.14264	0.13564	0.18386	0.16626
3393.8	0.13248	0.14261	0.13546	0.18395	0.16522
3393.9	0.13292	0.14187	0.13675	0.18349	0.16613
3394	0.1334	0.13989	0.13788	0.18257	0.16604
3394.1	0.1348	0.13858	0.13749	0.18185	0.16467
3394.2	0.13634	0.13862	0.13597	0.18124	0.16503
3394.3	0.13698	0.13942	0.13357	0.18106	0.16641
3394.4	0.13671	0.13996	0.13158	0.18146	0.16812
3394.5	0.13574	0.13948	0.13164	0.18113	0.17094
3394.6	0.13448	0.13887	0.13409	0.18017	0.17306
3394.7	0.13355	0.13877	0.13746	0.18007	0.17457
3394.8	0.1338	0.13843	0.13935	0.18127	0.17561
3394.9	0.13499	0.13803	0.1395	0.18273	0.17391
3395	0.13513	0.13816	0.13913	0.1836	0.1696
3395.1	0.13414	0.13834	0.13942	0.18335	0.16634
3395.2	0.13375	0.13846	0.14097	0.18203	0.16624
3395.3	0.13418	0.13864	0.14229	0.18097	0.16551
3395.4	0.13468	0.13862	0.14247	0.181	0.16186
3395.5	0.13461	0.13879	0.14197	0.18125	0.15886
3395.6	0.13438	0.13951	0.14079	0.18109	0.15974
3395.7	0.13497	0.1402	0.13891	0.18125	0.16219
3395.8	0.1361	0.14011	0.13709	0.18188	0.16266
3395.9	0.13652	0.13974	0.1361	0.18223	0.16158
3396	0.13613	0.13993	0.13631	0.18251	0.16081
3396.1	0.13613	0.14008	0.13802	0.18301	0.16248
3396.2	0.1364	0.13969	0.1404	0.18305	0.16622
3396.3	0.13608	0.13895	0.14285	0.18276	0.16923
3396.4	0.1359	0.13817	0.14476	0.18288	0.16954
3396.5	0.13652	0.13766	0.14361	0.1833	0.16681
3396.6	0.13742	0.1375	0.13984	0.18281	0.1648
3396.7	0.13757	0.13735	0.13741	0.18111	0.16663
3396.8	0.13611	0.13704	0.13762	0.17955	0.16922
3396.9	0.13377	0.13724	0.13871	0.17882	0.16995
3397	0.13249	0.13811	0.13876	0.17908	0.16912
3397.1	0.13227	0.13901	0.13732	0.18022	0.1682
3397.2	0.13223	0.13893	0.13616	0.1808	0.16885
3397.3	0.13242	0.13787	0.13627	0.18093	0.16883
3397.4	0.13253	0.13751	0.13674	0.18135	0.16735
3397.5	0.13271	0.13794	0.13722	0.18084	0.167
3397.6	0.13354	0.13752	0.13752	0.18029	0.16776
3397.7	0.13417	0.13593	0.13814	0.18138	0.1681
3397.8	0.13363	0.13513	0.13914	0.18233	0.1657
3397.9	0.13224	0.13591	0.1396	0.18182	0.16308
3398	0.13103	0.13697	0.1396	0.18079	0.16429
3398.1	0.13073	0.13781	0.13955	0.17981	0.1663
3398.2	0.13148	0.13822	0.13913	0.17936	0.16843
3398.3	0.13285	0.13793	0.13726	0.1794	0.17052
3398.4	0.13383	0.13793	0.13521	0.17919	0.17
3398.5	0.13386	0.13859	0.13551	0.1788	0.168
3398.6	0.1336	0.13899	0.13676	0.17869	0.16544
3398.7	0.13347	0.13877	0.1368	0.17885	0.16376
3398.8	0.13266	0.13826	0.13686	0.17887	0.16521
3398.9	0.13086	0.13818	0.13815	0.1786	0.16689
3399	0.12898	0.13851	0.13957	0.17812	0.16466
3399.1	0.12802	0.13829	0.13986	0.17782	0.16176
3399.2	0.12846	0.13753	0.13902	0.17798	0.16169
3399.3	0.12935	0.13742	0.13721	0.17831	0.16271
3399.4	0.13013	0.13836	0.13534	0.17867	0.16522
3399.5	0.13148	0.13881	0.13426	0.17865	0.16848
3399.6	0.13255	0.13857	0.13431	0.17848	0.16846
3399.7	0.13263	0.13917	0.13519	0.17891	0.16551
3399.8	0.13259	0.13955	0.1364	0.17987	0.16238
3399.9	0.13261	0.13813	0.13774	0.18111	0.16067
3400	0.13288	0.13611	0.1385	0.18206	0.16159
3400.1	0.13368	0.13548	0.13831	0.1823	0.16447
3400.2	0.1349	0.13622	0.13741	0.18212	0.16775
3400.3	0.13546	0.1369	0.13668	0.18233	0.17097
3400.4	0.13482	0.13742	0.13582	0.18376	0.17191
3400.5	0.13437	0.1383	0.13364	0.18553	0.16826
3400.6	0.13407	0.13923	0.13177	0.18589	0.16563
3400.7	0.1335	0.13943	0.13104	0.18496	0.16822
3400.8	0.13406	0.13892	0.13066	0.18398	0.17
3400.9	0.13564	0.13846	0.13137	0.18343	0.16711
3401	0.13662	0.13858	0.13267	0.1831	0.16441
3401.1	0.1368	0.13965	0.13393	0.18269	0.16653
3401.2	0.13674	0.14043	0.13599	0.18195	0.16922
3401.3	0.13707	0.14018	0.13837	0.18062	0.16776
3401.4	0.13738	0.14032	0.13987	0.17923	0.16586
3401.5	0.13676	0.14056	0.13989	0.17876	0.16773
3401.6	0.13571	0.14008	0.13874	0.17915	0.17138
3401.7	0.13499	0.13989	0.13737	0.17946	0.17335
3401.8	0.13446	0.14086	0.13636	0.1792	0.17271
3401.9	0.13401	0.14263	0.13574	0.17878	0.17047
3402	0.13382	0.14405	0.13477	0.17903	0.16964
3402.1	0.13357	0.14434	0.13362	0.1799	0.17209
3402.2	0.13347	0.14332	0.13366	0.17998	0.17488
3402.3	0.13438	0.14107	0.1338	0.1792	0.17416
3402.4	0.13578	0.13848	0.13324	0.17854	0.17068
3402.5	0.13643	0.13695	0.13407	0.17796	0.16905
3402.6	0.13684	0.13655	0.13554	0.17769	0.17096
3402.7	0.13764	0.13682	0.13491	0.17776	0.17327
3402.8	0.13805	0.13797	0.1325	0.17758	0.17322
3402.9	0.13776	0.13894	0.1305	0.17704	0.17122
3403	0.13717	0.13936	0.1309	0.17702	0.16955
3403.1	0.1364	0.14014	0.13345	0.17826	0.16972
3403.2	0.13561	0.14	0.13528	0.17988	0.16996
3403.3	0.13482	0.13861	0.13569	0.18078	0.16909
3403.4	0.13383	0.13807	0.13598	0.18121	0.16984
3403.5	0.13324	0.13892	0.13554	0.18181	0.17137
3403.6	0.13377	0.13941	0.13459	0.18213	0.17125
3403.7	0.1342	0.13849	0.13407	0.18167	0.17111
3403.8	0.13359	0.13722	0.13372	0.18105	0.17202
3403.9	0.13318	0.13632	0.1339	0.18103	0.17352
3404	0.13332	0.13502	0.13508	0.18153	0.17389
3404.1	0.13338	0.13406	0.13614	0.18195	0.17142
3404.2	0.13347	0.13509	0.13671	0.18212	0.1683
3404.3	0.13326	0.13677	0.137	0.18197	0.16717
3404.4	0.13236	0.13711	0.13558	0.18132	0.1682
3404.5	0.13152	0.1367	0.13363	0.18033	0.16994
3404.6	0.13121	0.13646	0.13413	0.17918	0.17132
3404.7	0.13081	0.13591	0.1365	0.17798	0.1725
3404.8	0.13053	0.13531	0.13819	0.17726	0.17283
3404.9	0.13112	0.13519	0.13847	0.17745	0.17153
3405	0.13247	0.13543	0.13873	0.17786	0.17002
3405.1	0.13458	0.1364	0.1401	0.17797	0.16922
3405.2	0.13646	0.1386	0.14116	0.17797	0.16812
3405.3	0.13679	0.14117	0.14067	0.17816	0.16757
3405.4	0.13645	0.14247	0.13991	0.17825	0.16866
3405.5	0.13654	0.14272	0.14008	0.17789	0.17206
3405.6	0.13646	0.14243	0.1406	0.17795	0.17523
3405.7	0.13579	0.14147	0.14065	0.17879	0.17481
3405.8	0.13531	0.14042	0.14062	0.17949	0.17336
3405.9	0.13554	0.13959	0.14091	0.17945	0.1735
3406	0.1357	0.13935	0.14104	0.1792	0.17374
3406.1	0.13489	0.14022	0.14012	0.17903	0.17217
3406.2	0.13396	0.14066	0.13882	0.17847	0.17127
3406.3	0.13386	0.13962	0.13797	0.17799	0.17259
3406.4	0.13399	0.13857	0.13655	0.17827	0.17302
3406.5	0.1343	0.1381	0.13569	0.17906	0.1724
3406.6	0.13513	0.13822	0.13645	0.17987	0.17309
3406.7	0.13585	0.13943	0.13669	0.18055	0.17561
3406.8	0.13593	0.14123	0.13625	0.18133	0.17791
3406.9	0.13558	0.14237	0.13637	0.18247	0.17738
3407	0.13536	0.14239	0.13707	0.18369	0.17352
3407.1	0.13527	0.14146	0.13806	0.18439	0.16929
3407.2	0.13534	0.13992	0.13825	0.18424	0.16923
3407.3	0.1355	0.13862	0.13796	0.18312	0.17371
3407.4	0.13509	0.13775	0.13817	0.18165	0.17934
3407.5	0.13373	0.13623	0.13901	0.18064	0.1833
3407.6	0.13211	0.13452	0.14011	0.17985	0.18281
3407.7	0.13163	0.13401	0.13978	0.17866	0.17919
3407.8	0.13231	0.13397	0.13803	0.17796	0.1777
3407.9	0.13309	0.13477	0.13692	0.17895	0.17899
3408	0.13331	0.1376	0.1372	0.18056	0.17908
3408.1	0.13302	0.14048	0.138	0.1807	0.176
3408.2	0.13294	0.14153	0.13868	0.18007	0.17236
3408.3	0.13295	0.14209	0.13874	0.18034	0.17285
3408.4	0.13327	0.14366	0.13789	0.18048	0.1789
3408.5	0.13366	0.14486	0.13674	0.17989	0.18314
3408.6	0.13346	0.14446	0.13645	0.17951	0.18069
3408.7	0.13343	0.14442	0.13734	0.17971	0.17646
3408.8	0.1342	0.14577	0.13816	0.18062	0.17386
3408.9	0.13588	0.14685	0.13806	0.18207	0.17242
3409	0.13757	0.1468	0.13763	0.18368	0.17287
3409.1	0.13805	0.14611	0.13702	0.18461	0.17434
3409.2	0.1374	0.1451	0.13631	0.18389	0.17442
3409.3	0.13616	0.1439	0.13598	0.18232	0.1733
3409.4	0.13445	0.14304	0.13591	0.18148	0.17169
3409.5	0.13279	0.14244	0.13606	0.18129	0.17005
3409.6	0.13195	0.14152	0.1357	0.18086	0.17016
3409.7	0.13231	0.1405	0.13543	0.18025	0.17429
3409.8	0.133	0.13931	0.13675	0.17956	0.18149
3409.9	0.13294	0.13845	0.13765	0.17897	0.18678
3410	0.1332	0.13883	0.13759	0.17874	0.18702
3410.1	0.13467	0.13963	0.13854	0.17837	0.18466
3410.2	0.13665	0.14023	0.13935	0.17782	0.18246
3410.3	0.13853	0.1414	0.1388	0.17758	0.18052
3410.4	0.13999	0.14322	0.13777	0.17732	0.17986
3410.5	0.14073	0.14432	0.13728	0.17733	0.18234
3410.6	0.14096	0.14437	0.13861	0.17834	0.1871
3410.7	0.1416	0.1445	0.14157	0.17959	0.19127
3410.8	0.14301	0.14495	0.14426	0.181	0.19147
3410.9	0.14495	0.14493	0.14503	0.18258	0.18811
3411	0.14769	0.14418	0.14285	0.18317	0.18687
3411.1	0.15165	0.14323	0.13879	0.18311	0.19035
3411.2	0.15631	0.14212	0.13564	0.18318	0.19574
3411.3	0.16165	0.14047	0.13415	0.18354	0.20103
3411.4	0.16804	0.13879	0.13382	0.18439	0.20478
3411.5	0.17445	0.1375	0.13526	0.18533	0.20478
3411.6	0.17963	0.13637	0.13839	0.18577	0.20311
3411.7	0.18302	0.13493	0.1408	0.18486	0.20247
3411.8	0.18579	0.13293	0.14053	0.18237	0.20315
3411.9	0.1885	0.13122	0.13877	0.17988	0.20494
3412	0.18949	0.13086	0.13749	0.17835	0.20684
3412.1	0.18854	0.13117	0.13752	0.17728	0.20926
3412.2	0.18652	0.13074	0.13868	0.17671	0.21257
3412.3	0.18423	0.13066	0.13878	0.17665	0.21721
3412.4	0.18409	0.13254	0.13766	0.17662	0.22285
3412.5	0.1882	0.1353	0.13783	0.1766	0.22686
3412.6	0.19637	0.13739	0.13901	0.17691	0.2298
3412.7	0.20796	0.13894	0.13918	0.177	0.23265
3412.8	0.22193	0.14037	0.13831	0.17634	0.23496
3412.9	0.23737	0.14157	0.13749	0.17605	0.23702
3413	0.25303	0.14254	0.13764	0.17681	0.23881
3413.1	0.26649	0.14274	0.13896	0.17773	0.24237
3413.2	0.27591	0.14207	0.13997	0.17838	0.24614
3413.3	0.27917	0.14167	0.13947	0.17924	0.24753
3413.4	0.27499	0.14233	0.13769	0.18027	0.25116
3413.5	0.26383	0.14309	0.13606	0.18036	0.25809
3413.6	0.24622	0.14278	0.13664	0.17955	0.26451
3413.7	0.22317	0.14179	0.13804	0.17921	0.26982
3413.8	0.19568	0.14116	0.13783	0.17912	0.27295
3413.9	0.16451	0.14134	0.13756	0.17901	0.27243
3414	0.13058	0.14169	0.13756	0.17972	0.27153
3414.1	0.0953	0.14109	0.13612	0.18018	0.27134
3414.2	0.06081	0.13914	0.13433	0.1793	0.2704
3414.3	0.02894	0.13698	0.13402	0.17815	0.27102
3414.4	0.000626361	0.13632	0.13523	0.17751	0.27221
3414.5	-0.02238	0.13709	0.13671	0.17763	0.27098
3414.6	-0.03733	0.13784	0.13774	0.17828	0.26444
3414.7	-0.0432	0.13789	0.13877	0.17849	0.25261
3414.8	-0.04097	0.1374	0.13857	0.17841	0.24165
3414.9	-0.0314	0.13707	0.13706	0.17877	0.23284
3415	-0.01503	0.13752	0.13697	0.17937	0.22589
3415.1	0.00611	0.1386	0.13881	0.17971	0.22126
3415.2	0.02919	0.14009	0.14033	0.17983	0.21524
3415.3	0.05071	0.1419	0.13937	0.1807	0.20627
3415.4	0.06835	0.14336	0.1365	0.1825	0.19661
3415.5	0.08279	0.14346	0.13469	0.18375	0.1883
3415.6	0.09483	0.14276	0.1345	0.1836	0.18081
3415.7	0.10429	0.14214	0.13444	0.18323	0.17399
3415.8	0.11098	0.1412	0.13507	0.18375	0.16754
3415.9	0.11523	0.14068	0.13638	0.18451	0.15977
3416	0.11828	0.14164	0.13696	0.18487	0.15055
3416.1	0.12143	0.14261	0.13756	0.18516	0.1411
3416.2	0.12444	0.14256	0.13983	0.18582	0.13106
3416.3	0.1263	0.14238	0.14244	0.18673	0.12128
3416.4	0.12712	0.14242	0.14274	0.18754	0.11435
3416.5	0.12717	0.1421	0.14121	0.18847	0.10842
3416.6	0.12629	0.14144	0.13938	0.18962	0.10206
3416.7	0.12448	0.1408	0.13799	0.19002	0.0981
3416.8	0.12315	0.1401	0.13792	0.18887	0.09866
3416.9	0.12404	0.13981	0.13961	0.18708	0.10197
3417	0.12624	0.13956	0.14229	0.1861	0.10347
3417.1	0.12789	0.13884	0.14462	0.186	0.10004
3417.2	0.12931	0.1384	0.14595	0.18568	0.09353
3417.3	0.13067	0.13876	0.14567	0.18463	0.08998
3417.4	0.13076	0.13956	0.14434	0.1838	0.09084
3417.5	0.12984	0.13972	0.14311	0.18356	0.09154
3417.6	0.12908	0.13889	0.1417	0.18356	0.09241
3417.7	0.12905	0.13863	0.1407	0.18439	0.09811
3417.8	0.12972	0.13998	0.14053	0.18572	0.10545
3417.9	0.13099	0.1416	0.13964	0.18667	0.10945
3418	0.13264	0.14263	0.13766	0.18721	0.11266
3418.1	0.13334	0.14296	0.13553	0.18713	0.11698
3418.2	0.13279	0.14226	0.13416	0.18678	0.11985
3418.3	0.13237	0.14115	0.13431	0.18641	0.12094
3418.4	0.13248	0.14068	0.13588	0.1855	0.12276
3418.5	0.13279	0.14116	0.13774	0.18438	0.12604
3418.6	0.13365	0.14162	0.13842	0.18358	0.12994
3418.7	0.13495	0.14132	0.13766	0.18376	0.13175
3418.8	0.13592	0.14112	0.13699	0.18585	0.13165
3418.9	0.13643	0.14161	0.13749	0.18995	0.13379
3419	0.13698	0.14253	0.13833	0.19481	0.13785
3419.1	0.13783	0.14345	0.13863	0.19845	0.14185
3419.2	0.13794	0.14381	0.13941	0.19972	0.14487
3419.3	0.13672	0.1434	0.14112	0.19868	0.14558
3419.4	0.13598	0.14263	0.1423	0.19591	0.14523
3419.5	0.13627	0.14194	0.14241	0.19151	0.14664
3419.6	0.13599	0.14173	0.14216	0.18541	0.15131
3419.7	0.13529	0.14208	0.14165	0.17832	0.15663
3419.8	0.13522	0.14323	0.14144	0.1718	0.16001
3419.9	0.13519	0.14468	0.14255	0.16735	0.16395
3420	0.13442	0.14477	0.1439	0.16431	0.1668
3420.1	0.1339	0.143	0.14364	0.16227	0.16484
3420.2	0.13455	0.14057	0.14148	0.16231	0.16277
3420.3	0.13517	0.13893	0.13938	0.16402	0.16334
3420.4	0.1344	0.13832	0.13974	0.16613	0.1626
3420.5	0.1335	0.13819	0.14248	0.16834	0.15929
3420.6	0.13368	0.1388	0.14451	0.17046	0.15711
3420.7	0.13408	0.14057	0.1438	0.17196	0.15824
3420.8	0.13415	0.14211	0.14222	0.1726	0.16119
3420.9	0.13379	0.14284	0.1402	0.17328	0.16522
3421	0.13329	0.14361	0.13754	0.17485	0.16865
3421.1	0.1335	0.14396	0.13602	0.17658	0.16805
3421.2	0.13431	0.14388	0.1355	0.1775	0.16528
3421.3	0.13452	0.14406	0.13454	0.17748	0.16664
3421.4	0.13337	0.14431	0.13378	0.1765	0.17041
3421.5	0.13209	0.14434	0.13423	0.17523	0.17091
3421.6	0.13134	0.14511	0.13504	0.17481	0.17148
3421.7	0.12999	0.14686	0.13553	0.17518	0.17438
3421.8	0.12899	0.14802	0.13594	0.17577	0.17607
3421.9	0.12977	0.14769	0.13711	0.17609	0.17666
3422	0.13162	0.14654	0.13875	0.17609	0.17777
3422.1	0.13317	0.14516	0.1396	0.17603	0.17906
3422.2	0.133	0.14315	0.13924	0.17579	0.17957
3422.3	0.13199	0.14055	0.13878	0.17515	0.17944
3422.4	0.13215	0.13815	0.14009	0.17425	0.1794
3422.5	0.13272	0.13672	0.14282	0.17379	0.17998
3422.6	0.13274	0.1365	0.14513	0.17424	0.18156
3422.7	0.1336	0.13636	0.14563	0.17522	0.18284
3422.8	0.13605	0.13613	0.14421	0.17559	0.1854
3422.9	0.13847	0.13724	0.14241	0.17534	0.19257
3423	0.13983	0.13947	0.14138	0.17544	0.20113
3423.1	0.14049	0.1418	0.14039	0.17585	0.20676
3423.2	0.14018	0.14347	0.13929	0.17668	0.2097
3423.3	0.13986	0.14333	0.1384	0.17789	0.21183
3423.4	0.14112	0.14245	0.13797	0.1788	0.2143
3423.5	0.14284	0.143	0.13874	0.1798	0.21603
3423.6	0.14371	0.14449	0.13995	0.181	0.21823
3423.7	0.1434	0.14552	0.14033	0.18158	0.22306
3423.8	0.14152	0.14578	0.1394	0.1814	0.22722
3423.9	0.13928	0.14572	0.1387	0.18086	0.22976
3424	0.13771	0.14588	0.14002	0.18056	0.23388
3424.1	0.13673	0.14607	0.14234	0.18089	0.23963
3424.2	0.13715	0.14579	0.14427	0.18152	0.24635
3424.3	0.13913	0.14496	0.1447	0.18194	0.2542
3424.4	0.14162	0.14385	0.14302	0.18205	0.26056
3424.5	0.14466	0.14267	0.14077	0.18188	0.26491
3424.6	0.14789	0.14145	0.13891	0.18122	0.27273
3424.7	0.15108	0.1405	0.13733	0.18034	0.2837
3424.8	0.15654	0.14033	0.13618	0.17998	0.29094
3424.9	0.16605	0.14152	0.13515	0.18024	0.29395
3425	0.17916	0.14415	0.13415	0.18034	0.29634
3425.1	0.19498	0.14743	0.13393	0.17957	0.29924
3425.2	0.21417	0.15061	0.13488	0.17865	0.30259
3425.3	0.2386	0.15255	0.13561	0.1784	0.30537
3425.4	0.26743	0.15298	0.13514	0.17836	0.30802
3425.5	0.29669	0.15371	0.13506	0.17818	0.31316
3425.6	0.32412	0.15482	0.13645	0.17865	0.31871
3425.7	0.34896	0.15475	0.13768	0.17995	0.32151
3425.8	0.36897	0.1535	0.13733	0.18134	0.32255
3425.9	0.38107	0.15125	0.13659	0.18289	0.32205
3426	0.38334	0.14814	0.13618	0.1847	0.32111
3426.1	0.37619	0.14552	0.13616	0.1862	0.32173
3426.2	0.36106	0.14428	0.1372	0.18666	0.32169
3426.3	0.33931	0.14339	0.13775	0.18634	0.31786
3426.4	0.31278	0.14179	0.13747	0.18587	0.31085
3426.5	0.28379	0.13924	0.1379	0.18542	0.3041
3426.6	0.2552	0.13655	0.13804	0.1852	0.29741
3426.7	0.22936	0.13452	0.13826	0.18433	0.29024
3426.8	0.20733	0.13264	0.13927	0.18253	0.28639
3426.9	0.1897	0.13127	0.13876	0.18147	0.28475
3427	0.17652	0.13157	0.13658	0.18156	0.28069
3427.1	0.16719	0.13324	0.13531	0.18135	0.27202
3427.2	0.16027	0.13471	0.13545	0.18037	0.25982
3427.3	0.15484	0.13613	0.13601	0.17993	0.24679
3427.4	0.15109	0.13823	0.13736	0.18057	0.23406
3427.5	0.14714	0.13959	0.13998	0.18109	0.22273
3427.6	0.14028	0.1395	0.14155	0.18066	0.21278
3427.7	0.13034	0.14002	0.14001	0.17956	0.20479
3427.8	0.11675	0.14228	0.13798	0.17857	0.19836
3427.9	0.09756	0.14469	0.13765	0.17833	0.18988
3428	0.0729	0.14611	0.13751	0.17885	0.1801
3428.1	0.04492	0.14711	0.13706	0.17986	0.17184
3428.2	0.01509	0.1472	0.13709	0.1807	0.1634
3428.3	-0.01519	0.14537	0.13722	0.18105	0.15495
3428.4	-0.04374	0.1421	0.13741	0.18184	0.1479
3428.5	-0.06827	0.13847	0.13823	0.18342	0.14059
3428.6	-0.08649	0.13503	0.13999	0.18408	0.13219
3428.7	-0.09648	0.13162	0.14151	0.18298	0.12167
3428.8	-0.09715	0.12817	0.14058	0.18127	0.11154
3428.9	-0.08842	0.12509	0.13904	0.17968	0.10541
3429	-0.07146	0.12325	0.13968	0.17853	0.09848
3429.1	-0.04958	0.12339	0.14006	0.17842	0.0878
3429.2	-0.02575	0.12487	0.13924	0.17845	0.07588
3429.3	-0.000662305	0.1264	0.13873	0.17799	0.06407
3429.4	0.02374	0.12767	0.13823	0.17834	0.05581
3429.5	0.04431	0.12905	0.13866	0.17886	0.05172
3429.6	0.06079	0.13081	0.1402	0.17864	0.0472
3429.7	0.07468	0.13244	0.14025	0.17891	0.04196
3429.8	0.08661	0.13327	0.13806	0.17998	0.04034
3429.9	0.09592	0.13412	0.13623	0.18121	0.04325
3430	0.10216	0.13548	0.13529	0.18219	0.04564
3430.1	0.10623	0.13659	0.13422	0.18252	0.04264
3430.2	0.10914	0.13743	0.13385	0.18215	0.03701
3430.3	0.11185	0.13864	0.13388	0.1816	0.03376
3430.4	0.1147	0.13975	0.13474	0.18093	0.03313
3430.5	0.1175	0.13992	0.13714	0.17999	0.03499
3430.6	0.12076	0.13912	0.13896	0.17933	0.0392
3430.7	0.12382	0.13782	0.13944	0.17971	0.04569
3430.8	0.12546	0.13718	0.13934	0.18069	0.05435
3430.9	0.12612	0.13771	0.13911	0.18077	0.06225
3431	0.12661	0.13779	0.13914	0.18051	0.06842
3431.1	0.12662	0.13662	0.1391	0.18178	0.07232
3431.2	0.12549	0.13594	0.13901	0.18363	0.07404
3431.3	0.12373	0.13633	0.13929	0.18475	0.07656
3431.4	0.1231	0.13677	0.13954	0.18543	0.0796
3431.5	0.12404	0.13713	0.1396	0.18616	0.08267
3431.6	0.12464	0.13681	0.14043	0.18756	0.08756
3431.7	0.12473	0.13589	0.14267	0.18869	0.09458
3431.8	0.12609	0.13598	0.14425	0.18843	0.10188
3431.9	0.12922	0.13709	0.14307	0.18772	0.10627
3432	0.13277	0.13779	0.14172	0.18712	0.10849
3432.1	0.13489	0.13767	0.14165	0.18642	0.11141
3432.2	0.13506	0.13816	0.14088	0.18574	0.11532
3432.3	0.1336	0.13953	0.13945	0.18487	0.11959
3432.4	0.13169	0.14083	0.13816	0.18339	0.12387
3432.5	0.13054	0.14225	0.13752	0.1819	0.12979
3432.6	0.13031	0.14287	0.13736	0.18122	0.13537
3432.7	0.13124	0.14157	0.13752	0.18047	0.13647
3432.8	0.13331	0.13962	0.13934	0.17969	0.13669
3432.9	0.13554	0.13886	0.14179	0.17955	0.13953
3433	0.13599	0.13899	0.14217	0.17997	0.14306
3433.1	0.13455	0.13881	0.14098	0.18115	0.14528
3433.2	0.13345	0.13856	0.14063	0.18192	0.14601
3433.3	0.134	0.13848	0.14124	0.1814	0.14726
3433.4	0.13574	0.13822	0.14066	0.18074	0.15014
3433.5	0.13749	0.13837	0.1387	0.18117	0.15393
3433.6	0.13846	0.13951	0.13724	0.18287	0.15722
3433.7	0.13868	0.14053	0.13709	0.18484	0.15821
3433.8	0.13849	0.14036	0.13827	0.18646	0.1574
3433.9	0.13802	0.14013	0.13958	0.18874	0.15965
3434	0.13716	0.14045	0.13969	0.19239	0.16552
3434.1	0.13576	0.1399	0.1399	0.1975	0.16805
3434.2	0.13469	0.13836	0.14065	0.20331	0.16511
3434.3	0.13463	0.13699	0.14098	0.20779	0.162
3434.4	0.13492	0.1366	0.14175	0.21009	0.16223
3434.5	0.13489	0.13718	0.14284	0.20995	0.16331
3434.6	0.13435	0.13739	0.14353	0.20633	0.16278
3434.7	0.13357	0.13729	0.14369	0.19925	0.16323
3434.8	0.13295	0.13712	0.14248	0.18994	0.16749
3434.9	0.13298	0.13624	0.14092	0.17986	0.1727
3435	0.13322	0.13597	0.14036	0.17084	0.17317
3435.1	0.13254	0.13685	0.13967	0.16346	0.17041
3435.2	0.1318	0.13765	0.13767	0.15802	0.16872
3435.3	0.13148	0.13896	0.13612	0.15548	0.16921
3435.4	0.13092	0.1413	0.13659	0.15531	0.17283
3435.5	0.13061	0.14295	0.13668	0.15658	0.17715
3435.6	0.13068	0.14325	0.13546	0.15958	0.17828
3435.7	0.13138	0.14337	0.13493	0.16359	0.17762
3435.8	0.13264	0.14354	0.13596	0.16695	0.17857
3435.9	0.13333	0.1431	0.13696	0.16949	0.17989
3436	0.13324	0.14246	0.1369	0.17218	0.17973
3436.1	0.1332	0.14189	0.13786	0.17505	0.17925
3436.2	0.13332	0.141	0.14026	0.17677	0.18037
3436.3	0.13351	0.14016	0.14169	0.17641	0.18312
3436.4	0.13431	0.14004	0.14078	0.17539	0.1868
3436.5	0.13556	0.14046	0.13877	0.1751	0.19028
3436.6	0.13629	0.14056	0.13732	0.17566	0.19302
3436.7	0.13641	0.14073	0.13663	0.17698	0.1963
3436.8	0.13674	0.14177	0.13627	0.17829	0.20073
3436.9	0.13706	0.14309	0.13602	0.17918	0.20576
3437	0.13694	0.14416	0.13645	0.17955	0.20983
3437.1	0.13742	0.1448	0.13778	0.17922	0.21107
3437.2	0.13858	0.14486	0.1398	0.17851	0.20909
3437.3	0.13991	0.14425	0.14101	0.17771	0.20982
3437.4	0.14199	0.1429	0.14004	0.17716	0.21827
3437.5	0.14395	0.14056	0.13854	0.17677	0.22869
3437.6	0.14408	0.13851	0.13834	0.1764	0.2329
3437.7	0.14314	0.13851	0.13863	0.17579	0.23366
3437.8	0.14318	0.13971	0.1378	0.17427	0.23722
3437.9	0.14421	0.14126	0.13725	0.1725	0.24294
3438	0.14513	0.14248	0.13873	0.1719	0.24965
3438.1	0.14621	0.14251	0.1407	0.17266	0.2562
3438.2	0.1469	0.14227	0.14094	0.17403	0.26111
3438.3	0.14618	0.14249	0.13999	0.17544	0.26549
3438.4	0.14527	0.14317	0.14037	0.17652	0.27161
3438.5	0.14575	0.14398	0.14177	0.17713	0.28084
3438.6	0.14734	0.14358	0.14161	0.1777	0.29152
3438.7	0.14979	0.14215	0.14035	0.17887	0.29939
3438.8	0.15355	0.1417	0.14006	0.17965	0.30453
3438.9	0.15785	0.14264	0.13987	0.17906	0.30828
3439	0.16323	0.14397	0.13915	0.17804	0.30951
3439.1	0.17308	0.14507	0.139	0.1777	0.30889
3439.2	0.18859	0.14566	0.13949	0.17832	0.30711
3439.3	0.20806	0.14636	0.13962	0.17912	0.30415
3439.4	0.23139	0.14734	0.13896	0.17958	0.30314
3439.5	0.25896	0.14781	0.1384	0.17949	0.30577
3439.6	0.28831	0.14812	0.13892	0.17872	0.30791
3439.7	0.31618	0.14904	0.14039	0.17803	0.30786
3439.8	0.34027	0.15077	0.14141	0.17772	0.30752
3439.9	0.35808	0.15249	0.14101	0.17748	0.30466
3440	0.36755	0.15275	0.14145	0.17676	0.29509
3440.1	0.36834	0.15233	0.14421	0.17582	0.28248
3440.2	0.36113	0.15222	0.14606	0.17571	0.27341
3440.3	0.34644	0.15123	0.14564	0.17612	0.26753
3440.4	0.32521	0.14901	0.14404	0.17646	0.26036
3440.5	0.30034	0.1458	0.14257	0.17666	0.25002
3440.6	0.27338	0.14193	0.14366	0.17684	0.23884
3440.7	0.24552	0.1388	0.14627	0.17744	0.2301
3440.8	0.21947	0.1371	0.14688	0.17838	0.22544
3440.9	0.19659	0.13612	0.14577	0.17921	0.22106
3441	0.17799	0.13508	0.1452	0.17976	0.21315
3441.1	0.16417	0.13438	0.14506	0.17982	0.20393
3441.2	0.15467	0.1345	0.14397	0.17924	0.19612
3441.3	0.14923	0.13435	0.14197	0.17898	0.18856
3441.4	0.14674	0.13329	0.14008	0.17909	0.18003
3441.5	0.14601	0.13208	0.13854	0.17798	0.16984
3441.6	0.14555	0.13151	0.13813	0.176	0.15705
3441.7	0.14289	0.13213	0.13958	0.17448	0.1443
3441.8	0.13656	0.13389	0.14084	0.17296	0.13511
3441.9	0.12627	0.13641	0.13897	0.17138	0.12973
3442	0.11185	0.13938	0.1353	0.17056	0.12601
3442.1	0.09294	0.14199	0.13444	0.17068	0.12117
3442.2	0.0694	0.14363	0.13653	0.17147	0.11375
3442.3	0.04207	0.14421	0.139	0.17268	0.10364
3442.4	0.01218	0.14465	0.14039	0.17438	0.09291
3442.5	-0.01822	0.14521	0.1402	0.17639	0.08441
3442.6	-0.04551	0.14475	0.13966	0.17771	0.07841
3442.7	-0.06694	0.14356	0.1386	0.17842	0.07213
3442.8	-0.08078	0.1422	0.13747	0.17985	0.06353
3442.9	-0.08519	0.14014	0.13749	0.18173	0.0561
3443	-0.08043	0.13794	0.13684	0.18313	0.05211
3443.1	-0.06815	0.13579	0.1353	0.18391	0.04962
3443.2	-0.05055	0.13371	0.13469	0.1841	0.04596
3443.3	-0.02989	0.1323	0.13504	0.18426	0.03988
3443.4	-0.00767	0.13163	0.13576	0.18428	0.03586
3443.5	0.01425	0.13177	0.13684	0.18347	0.03594
3443.6	0.03459	0.13219	0.13695	0.18207	0.03495
3443.7	0.05305	0.13238	0.13502	0.18099	0.03209
3443.8	0.06878	0.13111	0.13342	0.18057	0.0306
3443.9	0.08113	0.12816	0.13365	0.17966	0.03108
3444	0.09062	0.12604	0.13428	0.1783	0.03395
3444.1	0.09806	0.12626	0.13458	0.17779	0.03813
3444.2	0.10371	0.12804	0.13484	0.17747	0.04181
3444.3	0.10761	0.13021	0.13546	0.17654	0.04463
3444.4	0.11002	0.13252	0.13725	0.17558	0.04674
3444.5	0.11157	0.13441	0.13962	0.17524	0.04948
3444.6	0.11303	0.13513	0.14116	0.17607	0.05535
3444.7	0.11506	0.13552	0.14186	0.17732	0.06519
3444.8	0.11763	0.13645	0.14186	0.1778	0.07541
3444.9	0.11986	0.13778	0.14052	0.17835	0.08112
3445	0.12142	0.13923	0.13782	0.17957	0.08203
3445.1	0.1226	0.14004	0.13586	0.18055	0.08376
3445.2	0.12338	0.14043	0.1357	0.1813	0.08955
3445.3	0.12372	0.14148	0.13641	0.18203	0.09516
3445.4	0.12418	0.14196	0.13727	0.18256	0.09775
3445.5	0.12508	0.14126	0.13776	0.18299	0.09971
3445.6	0.12546	0.14042	0.13853	0.18292	0.10143
3445.7	0.12543	0.13932	0.14007	0.18259	0.10351
3445.8	0.12606	0.13778	0.14123	0.18253	0.10863
3445.9	0.12709	0.13676	0.14128	0.18185	0.11472
3446	0.12771	0.1367	0.14038	0.18063	0.11884
3446.1	0.12726	0.13707	0.13857	0.18004	0.12205
3446.2	0.12618	0.138	0.13645	0.17975	0.12563
3446.3	0.12615	0.13904	0.13552	0.17925	0.12942
3446.4	0.12747	0.13908	0.13562	0.17944	0.13287
3446.5	0.12918	0.13879	0.13558	0.18075	0.13441
3446.6	0.13095	0.13902	0.13602	0.18201	0.13445
3446.7	0.13242	0.13926	0.1368	0.18264	0.13507
3446.8	0.13309	0.13941	0.13774	0.18306	0.13668
3446.9	0.13328	0.13991	0.13941	0.18355	0.13944
3447	0.13372	0.14025	0.14079	0.1842	0.14377
3447.1	0.13425	0.13956	0.14147	0.18488	0.1486
3447.2	0.13414	0.13803	0.14171	0.18485	0.15097
3447.3	0.13397	0.13663	0.14155	0.18442	0.15149
3447.4	0.13472	0.13572	0.14208	0.18451	0.15262
3447.5	0.13593	0.13526	0.14381	0.18475	0.15285
3447.6	0.13671	0.13566	0.14476	0.18445	0.15194
3447.7	0.13677	0.13703	0.14292	0.18424	0.15306
3447.8	0.13577	0.1383	0.14008	0.18548	0.15678
3447.9	0.1341	0.13878	0.13921	0.18756	0.16028
3448	0.13284	0.13879	0.13919	0.18859	0.16184
3448.1	0.13219	0.1385	0.13807	0.18821	0.16155
3448.2	0.13144	0.13892	0.13743	0.18736	0.15949
3448.3	0.13008	0.14083	0.13734	0.18665	0.15698
3448.4	0.1286	0.14255	0.13534	0.18587	0.15603
3448.5	0.12798	0.14269	0.13266	0.18517	0.15699
3448.6	0.12845	0.14184	0.13176	0.18512	0.1601
3448.7	0.12969	0.14071	0.13349	0.18549	0.16558
3448.8	0.13107	0.14005	0.13682	0.18529	0.17246
3448.9	0.13235	0.14042	0.13861	0.18463	0.17857
3449	0.13338	0.14148	0.13821	0.1848	0.18008
3449.1	0.13378	0.14218	0.13768	0.18581	0.17663
3449.2	0.13376	0.14127	0.13735	0.18714	0.17247
3449.3	0.13336	0.13902	0.13758	0.18929	0.16997
3449.4	0.13231	0.1372	0.13911	0.19215	0.16926
3449.5	0.13181	0.13718	0.13956	0.19433	0.17129
3449.6	0.13306	0.13879	0.13834	0.19556	0.17592
3449.7	0.13458	0.14081	0.13769	0.19601	0.17929
3449.8	0.13502	0.14235	0.13726	0.19539	0.1798
3449.9	0.1348	0.14287	0.13612	0.19387	0.18173
3450	0.13375	0.14214	0.13463	0.19121	0.18723
3450.1	0.13209	0.14026	0.1344	0.18711	0.19064
3450.2	0.13124	0.13838	0.13634	0.18215	0.19063
3450.3	0.13152	0.13792	0.1376	0.17765	0.1925
3450.4	0.13139	0.13871	0.13664	0.17453	0.19524
3450.5	0.13051	0.13999	0.13708	0.17332	0.1968
3450.6	0.13037	0.14158	0.14071	0.17406	0.19954
3450.7	0.131	0.1436	0.14353	0.17547	0.20383
3450.8	0.13142	0.14513	0.14304	0.17656	0.20666
3450.9	0.13152	0.14495	0.14125	0.17771	0.20708
3451	0.13131	0.14378	0.13905	0.17934	0.20775
3451.1	0.1313	0.14318	0.13641	0.18072	0.21129
3451.2	0.13221	0.14321	0.13458	0.18114	0.21671
3451.3	0.13356	0.14286	0.13512	0.18062	0.22042
3451.4	0.13468	0.14166	0.13811	0.17924	0.22382
3451.5	0.1356	0.13985	0.14022	0.17707	0.23011
3451.6	0.13647	0.13842	0.1394	0.17482	0.23883
3451.7	0.137	0.13806	0.13797	0.17335	0.24585
3451.8	0.13741	0.13855	0.13713	0.17268	0.247
3451.9	0.138	0.1392	0.13626	0.17249	0.24346
3452	0.13834	0.13937	0.13707	0.17283	0.23924
3452.1	0.13848	0.13888	0.13948	0.17326	0.23764
3452.2	0.13822	0.13768	0.1404	0.17351	0.23825
3452.3	0.13742	0.13664	0.14017	0.17431	0.2389
3452.4	0.13721	0.13669	0.14054	0.17518	0.23861
3452.5	0.13775	0.13744	0.14113	0.17521	0.23759
3452.6	0.1381	0.13863	0.14125	0.1753	0.23615
3452.7	0.13868	0.14007	0.14113	0.1758	0.23501
3452.8	0.14069	0.14059	0.14131	0.17557	0.23491
3452.9	0.14441	0.14006	0.14132	0.17468	0.23439
3453	0.14919	0.14033	0.14028	0.17393	0.22983
3453.1	0.15527	0.14187	0.13907	0.17346	0.22138
3453.2	0.16326	0.14218	0.1391	0.17334	0.21427
3453.3	0.17318	0.1406	0.14059	0.17415	0.20812
3453.4	0.18592	0.13899	0.14326	0.17555	0.20103
3453.5	0.20124	0.13844	0.1447	0.17618	0.19666
3453.6	0.21792	0.13918	0.14286	0.17611	0.19412
3453.7	0.23678	0.14078	0.13949	0.17648	0.18778
3453.8	0.2571	0.14137	0.1374	0.17721	0.17798
3453.9	0.27558	0.13981	0.1371	0.17778	0.16888
3454	0.28992	0.13782	0.13723	0.1781	0.16052
3454.1	0.2986	0.13666	0.13756	0.17811	0.1512
3454.2	0.30069	0.1361	0.13787	0.17806	0.14198
3454.3	0.29499	0.13662	0.13745	0.17843	0.13315
3454.4	0.28087	0.13827	0.13712	0.17957	0.12418
3454.5	0.26067	0.13972	0.13777	0.18117	0.11649
3454.6	0.23681	0.14033	0.13837	0.18292	0.11091
3454.7	0.21018	0.14013	0.13863	0.18412	0.10699
3454.8	0.18161	0.13915	0.13962	0.18416	0.10402
3454.9	0.15244	0.1377	0.14001	0.18412	0.10141
3455	0.12398	0.13653	0.1388	0.18418	0.09925
3455.1	0.09621	0.1359	0.13796	0.18345	0.09693
3455.2	0.06994	0.13505	0.13842	0.18276	0.09419
3455.3	0.04821	0.13429	0.1392	0.18247	0.0928
3455.4	0.03304	0.13499	0.13954	0.18207	0.09385
3455.5	0.0244	0.13663	0.13758	0.18178	0.09574
3455.6	0.02281	0.13814	0.13379	0.1814	0.0962
3455.7	0.02764	0.13945	0.13193	0.18078	0.09616
3455.8	0.03618	0.14058	0.13238	0.17981	0.09703
3455.9	0.0469	0.14177	0.1331	0.17845	0.09713
3456	0.05854	0.14255	0.13386	0.17789	0.09745
3456.1	0.06912	0.14235	0.13582	0.17823	0.10109
3456.2	0.07745	0.14164	0.13898	0.17896	0.1051
3456.3	0.08305	0.14087	0.1413	0.17939	0.10656
3456.4	0.08566	0.13995	0.1412	0.1791	0.10611
3456.5	0.08549	0.13897	0.14011	0.17914	0.10502
3456.6	0.08373	0.13808	0.13991	0.17941	0.10437
3456.7	0.08201	0.13714	0.14033	0.17974	0.10324
3456.8	0.08113	0.13693	0.14066	0.18046	0.10653
3456.9	0.08092	0.13822	0.14156	0.18088	0.11596
3457	0.08056	0.14032	0.14261	0.1804	0.12235
3457.1	0.08047	0.14164	0.14207	0.17884	0.12274
3457.2	0.08225	0.14191	0.14042	0.17712	0.12101
3457.3	0.08574	0.14259	0.13883	0.1769	0.11955
3457.4	0.08999	0.14421	0.13794	0.17769	0.12069
3457.5	0.09443	0.14524	0.13689	0.17816	0.12522
3457.6	0.09871	0.14492	0.13523	0.17912	0.13159
3457.7	0.10328	0.14408	0.13537	0.18084	0.13715
3457.8	0.10796	0.1427	0.13812	0.18228	0.13972
3457.9	0.11178	0.14075	0.1408	0.18351	0.14071
3458	0.11467	0.1388	0.14044	0.18473	0.14148
3458.1	0.11716	0.1374	0.1373	0.18553	0.14075
3458.2	0.11972	0.13695	0.13461	0.18555	0.14139
3458.3	0.12228	0.13621	0.13515	0.18462	0.14605
3458.4	0.12456	0.13445	0.13758	0.18337	0.14885
3458.5	0.12663	0.13311	0.13808	0.18261	0.14667
3458.6	0.12872	0.13302	0.13676	0.18223	0.14415
3458.7	0.13088	0.13289	0.13613	0.18131	0.14307
3458.8	0.13188	0.13175	0.13681	0.17964	0.14281
3458.9	0.13124	0.13023	0.13813	0.17868	0.14468
3459	0.1303	0.12944	0.13883	0.17924	0.14814
3459.1	0.12954	0.12955	0.13861	0.17977	0.15123
3459.2	0.12879	0.12919	0.13807	0.17964	0.15246
3459.3	0.12836	0.12829	0.13694	0.18024	0.1512
3459.4	0.12808	0.12873	0.13629	0.18182	0.14931
3459.5	0.12761	0.13099	0.13809	0.18328	0.14847
3459.6	0.1278	0.13342	0.14146	0.18404	0.15009
3459.7	0.12856	0.13471	0.14479	0.18436	0.15255
3459.8	0.12871	0.13462	0.14676	0.18436	0.15115
3459.9	0.12866	0.13376	0.14615	0.1838	0.14886
3460	0.12876	0.13443	0.14429	0.18307	0.15042
3460.1	0.12843	0.1366	0.14162	0.18299	0.154
3460.2	0.12882	0.13724	0.13854	0.18344	0.15789
3460.3	0.13091	0.13693	0.13696	0.18365	0.15834
3460.4	0.13264	0.13721	0.13662	0.18318	0.15416
3460.5	0.13269	0.13692	0.1363	0.18276	0.15128
3460.6	0.13244	0.13632	0.13603	0.18303	0.15131
3460.7	0.1324	0.13618	0.13551	0.18308	0.15116
3460.8	0.13184	0.13681	0.13482	0.18232	0.14976
3460.9	0.13116	0.13827	0.1351	0.18147	0.14777
3461	0.13138	0.13845	0.13551	0.18081	0.14702
3461.1	0.13276	0.13676	0.13514	0.18004	0.14813
3461.2	0.13445	0.13552	0.1351	0.1793	0.1512
3461.3	0.1353	0.13582	0.13566	0.1784	0.15667
3461.4	0.13526	0.13652	0.13584	0.17705	0.16059
3461.5	0.13433	0.13623	0.13555	0.17653	0.15993
3461.6	0.13318	0.13551	0.13542	0.17728	0.15854
3461.7	0.13375	0.13526	0.13548	0.17758	0.15976
3461.8	0.13559	0.13495	0.13575	0.17748	0.16086
3461.9	0.13631	0.13484	0.13632	0.1779	0.15932
3462	0.13579	0.13564	0.13621	0.17867	0.15721
3462.1	0.13524	0.13721	0.13478	0.17949	0.15741
3462.2	0.13472	0.13837	0.13365	0.17983	0.16004
3462.3	0.13459	0.1383	0.13397	0.17978	0.16247
3462.4	0.1353	0.13827	0.13528	0.17994	0.16239
3462.5	0.13574	0.1384	0.13674	0.18033	0.1591
3462.6	0.13534	0.13741	0.13766	0.18104	0.15475
3462.7	0.13507	0.13588	0.137	0.18214	0.1534
3462.8	0.13531	0.13513	0.13509	0.18302	0.15486
3462.9	0.13612	0.13579	0.13466	0.18351	0.15759
3463	0.13708	0.13737	0.13623	0.18409	0.16169
3463.1	0.1371	0.13828	0.13735	0.18406	0.16413
3463.2	0.13684	0.13827	0.13771	0.18292	0.16371
3463.3	0.1374	0.13853	0.1385	0.18152	0.1634
3463.4	0.13833	0.13897	0.13873	0.18057	0.16402
3463.5	0.1384	0.13891	0.13774	0.18012	0.1638
3463.6	0.13683	0.13895	0.13727	0.18016	0.16352
3463.7	0.13499	0.13969	0.13893	0.18077	0.16469
3463.8	0.13452	0.14109	0.14163	0.18134	0.16483
3463.9	0.13492	0.14236	0.14395	0.18105	0.16298
3464	0.1353	0.14219	0.14572	0.1803	0.16053
3464.1	0.13558	0.14035	0.14609	0.18004	0.15823
3464.2	0.13575	0.13821	0.14464	0.18082	0.1573
3464.3	0.13581	0.1371	0.14282	0.18215	0.15748
3464.4	0.13564	0.13665	0.14187	0.18262	0.15908
3464.5	0.13561	0.13634	0.1421	0.18189	0.16311
3464.6	0.13625	0.13661	0.14341	0.18106	0.16586
3464.7	0.13677	0.13725	0.14344	0.18042	0.16542
3464.8	0.13646	0.13719	0.14083	0.17975	0.16477
3464.9	0.13552	0.13615	0.13784	0.17921	0.16464
3465	0.13436	0.13531	0.13624	0.17905	0.16527
3465.1	0.13402	0.13536	0.13593	0.17886	0.1681
3465.2	0.13484	0.13601	0.13613	0.17816	0.17089
3465.3	0.13568	0.13738	0.13633	0.17746	0.16909
3465.4	0.13596	0.139	0.1374	0.17718	0.16236
3465.5	0.13614	0.14031	0.13924	0.17753	0.15702
3465.6	0.13587	0.14121	0.13977	0.17807	0.1587
3465.7	0.13469	0.14034	0.1392	0.17755	0.16313
3465.8	0.13396	0.13746	0.13919	0.17625	0.16385
3465.9	0.13444	0.13476	0.13916	0.17534	0.16172
3466	0.13473	0.1334	0.13791	0.17551	0.15983
3466.1	0.13415	0.13349	0.13682	0.17712	0.159
3466.2	0.13369	0.13515	0.13745	0.1792	0.15874
3466.3	0.13387	0.13704	0.13907	0.18003	0.15977
3466.4	0.13422	0.13747	0.1405	0.1794	0.16273
3466.5	0.13449	0.13681	0.14109	0.17835	0.16633
3466.6	0.13454	0.13649	0.14154	0.17744	0.16986
3466.7	0.13425	0.13736	0.14222	0.17651	0.17226
3466.8	0.1339	0.13915	0.14166	0.17581	0.17134
3466.9	0.13358	0.14075	0.13981	0.17586	0.1685
3467	0.13319	0.14152	0.13818	0.17611	0.16754
3467.1	0.13357	0.14193	0.13754	0.17629	0.17036
3467.2	0.13497	0.14219	0.13898	0.17693	0.1747
3467.3	0.1355	0.14239	0.14163	0.17785	0.1764
3467.4	0.13461	0.14233	0.14199	0.17837	0.17642
3467.5	0.13371	0.14141	0.14107	0.17846	0.17768
3467.6	0.13324	0.14002	0.14169	0.17858	0.17704
3467.7	0.13348	0.13867	0.14242	0.17864	0.17143
3467.8	0.13513	0.13807	0.14256	0.178	0.16488
3467.9	0.13701	0.13766	0.14324	0.17735	0.16133
3468	0.13739	0.13691	0.1437	0.17726	0.16075
3468.1	0.13644	0.13702	0.14299	0.17673	0.16242
3468.2	0.13531	0.13768	0.14136	0.17653	0.1635
3468.3	0.13465	0.13837	0.13977	0.17767	0.16447
3468.4	0.1345	0.13938	0.14011	0.17879	0.16805
3468.5	0.13485	0.13986	0.1425	0.17935	0.17019
3468.6	0.13572	0.13936	0.14422	0.17998	0.16901
3468.7	0.13661	0.13844	0.14336	0.18074	0.16903
3468.8	0.13682	0.13827	0.14056	0.18141	0.17049
3468.9	0.13644	0.13855	0.13731	0.18182	0.16987
3469	0.13623	0.13804	0.13462	0.18221	0.16816
3469.1	0.13648	0.13783	0.13352	0.18229	0.16767
3469.2	0.13649	0.13856	0.13392	0.18162	0.16794
3469.3	0.1357	0.13858	0.13492	0.18078	0.16837
3469.4	0.1346	0.13741	0.13673	0.18029	0.16834
3469.5	0.13385	0.13636	0.13852	0.18011	0.16963
3469.6	0.13336	0.13533	0.13927	0.1801	0.17273
3469.7	0.13335	0.13422	0.13908	0.17988	0.17387
3469.8	0.13335	0.13447	0.13753	0.17909	0.17238
3469.9	0.13278	0.13643	0.13634	0.1781	0.16894
3470	0.13225	0.13835	0.13762	0.17755	0.16518
3470.1	0.13188	0.13867	0.139	0.17745	0.1626
3470.2	0.13176	0.13801	0.13839	0.17776	0.15911
3470.3	0.13166	0.13801	0.13699	0.17825	0.15637
3470.4	0.13137	0.13916	0.13571	0.17875	0.15814
3470.5	0.13144	0.14068	0.13475	0.1796	0.16073
3470.6	0.13182	0.14161	0.13522	0.18084	0.16058
3470.7	0.13223	0.14114	0.13694	0.1817	0.16076
3470.8	0.13233	0.13971	0.13791	0.18176	0.16334
3470.9	0.13221	0.13853	0.13765	0.18164	0.16789
3471	0.13217	0.13765	0.13725	0.18172	0.17279
3471.1	0.13221	0.13738	0.13738	0.18182	0.17655
3471.2	0.13306	0.13808	0.13752	0.18175	0.17783
3471.3	0.1345	0.13912	0.13761	0.18148	0.17628
3471.4	0.13504	0.14023	0.13823	0.18139	0.1736
3471.5	0.13486	0.14109	0.13914	0.18169	0.17327
3471.6	0.13469	0.14135	0.13994	0.18203	0.1767
3471.7	0.13482	0.14085	0.13994	0.18181	0.17847
3471.8	0.13602	0.13986	0.13919	0.18076	0.17663
3471.9	0.13717	0.13952	0.13878	0.17932	0.17306
3472	0.13644	0.13934	0.13876	0.17837	0.16747
3472.1	0.13549	0.13817	0.13867	0.17806	0.16227
3472.2	0.13607	0.137	0.13853	0.17817	0.15998
3472.3	0.1366	0.13625	0.13861	0.17855	0.16134
3472.4	0.1358	0.13546	0.13913	0.17861	0.1658
3472.5	0.13447	0.13491	0.13938	0.17843	0.17035
3472.6	0.13323	0.13451	0.14001	0.17867	0.17076
3472.7	0.13244	0.13476	0.14161	0.1795	0.16733
3472.8	0.13265	0.1361	0.14272	0.18075	0.16679
3472.9	0.13347	0.13688	0.14354	0.1817	0.17202
3473	0.13388	0.13645	0.14451	0.18151	0.17714
3473.1	0.13386	0.13646	0.14491	0.1803	0.17608
3473.2	0.13347	0.13762	0.14383	0.1798	0.16936
3473.3	0.1328	0.13852	0.14141	0.18044	0.16307
3473.4	0.13273	0.13873	0.1401	0.18066	0.16314
3473.5	0.13269	0.13898	0.14016	0.18022	0.16881
3473.6	0.13146	0.13866	0.13878	0.18025	0.17265
3473.7	0.13038	0.13762	0.13549	0.18068	0.16963
3473.8	0.13095	0.13683	0.13276	0.18053	0.16247
3473.9	0.1326	0.13663	0.132	0.17977	0.15576
3474	0.13406	0.13701	0.13349	0.1791	0.15294
3474.1	0.13504	0.13799	0.13661	0.17911	0.1553
3474.2	0.13565	0.13889	0.13963	0.17955	0.1596
3474.3	0.13539	0.13869	0.1413	0.17944	0.16303
3474.4	0.13474	0.1373	0.1412	0.17876	0.16493
3474.5	0.13476	0.13603	0.1402	0.17841	0.16461
3474.6	0.13518	0.13559	0.13875	0.17872	0.16377
3474.7	0.13539	0.13549	0.13806	0.17929	0.16437
3474.8	0.13555	0.13532	0.1389	0.1802	0.16597
3474.9	0.13515	0.13539	0.1389	0.18119	0.16771
3475	0.13404	0.13626	0.13747	0.18137	0.16806
3475.1	0.13358	0.13747	0.13627	0.18073	0.16822
3475.2	0.13413	0.13852	0.13666	0.17983	0.16718
3475.3	0.13462	0.13916	0.1377	0.17931	0.16283
3475.4	0.13413	0.13937	0.13709	0.17951	0.16052
3475.5	0.1335	0.13982	0.13624	0.18051	0.16267
3475.6	0.13341	0.14055	0.13763	0.18191	0.16582
3475.7	0.13308	0.14074	0.13963	0.18291	0.16734
3475.8	0.13345	0.14051	0.13982	0.18257	0.16692
3475.9	0.13462	0.1402	0.13848	0.18106	0.16525
3476	0.13455	0.13952	0.13749	0.18002	0.16291
3476.1	0.13306	0.13882	0.1379	0.18023	0.16237
3476.2	0.1317	0.13865	0.13874	0.18043	0.16267
3476.3	0.13124	0.13833	0.13935	0.17985	0.16051
3476.4	0.13143	0.13767	0.13913	0.17905	0.16017
3476.5	0.13178	0.13803	0.13866	0.17822	0.16314
3476.6	0.13228	0.13843	0.13904	0.17777	0.16482
3476.7	0.13343	0.13757	0.13833	0.17794	0.16331
3476.8	0.13516	0.13712	0.13639	0.1782	0.15956
3476.9	0.13597	0.13773	0.13573	0.17857	0.1575
3477	0.13538	0.13799	0.13629	0.17929	0.15886
3477.1	0.13482	0.13759	0.13694	0.17994	0.16213
3477.2	0.13462	0.13744	0.13746	0.18033	0.16519
3477.3	0.13396	0.13818	0.13682	0.18062	0.16521
3477.4	0.13335	0.13884	0.13524	0.18017	0.16133
3477.5	0.13358	0.13809	0.13508	0.17908	0.1561
3477.6	0.13427	0.1372	0.13705	0.17844	0.15369
3477.7	0.13486	0.13759	0.13988	0.17836	0.15599
3477.8	0.13414	0.13817	0.14204	0.17825	0.16165
3477.9	0.13247	0.13869	0.14251	0.17811	0.1664
3478	0.13245	0.13998	0.14194	0.17832	0.16725
3478.1	0.13378	0.14111	0.14144	0.17859	0.16654
3478.2	0.13458	0.14181	0.13993	0.17865	0.16733
3478.3	0.13511	0.14229	0.13735	0.17903	0.16856
3478.4	0.1352	0.14181	0.13565	0.18	0.16892
3478.5	0.13411	0.14071	0.13441	0.18082	0.17042
3478.6	0.13243	0.1397	0.1327	0.18128	0.17133
3478.7	0.13111	0.13898	0.13205	0.18191	0.16979
3478.8	0.13098	0.13823	0.13428	0.18231	0.16793
3478.9	0.1311	0.13781	0.1376	0.18185	0.16552
3479	0.12989	0.13862	0.13925	0.18089	0.1637
3479.1	0.12883	0.13943	0.1394	0.18038	0.16415
3479.2	0.12961	0.13826	0.13896	0.18019	0.16414
3479.3	0.13136	0.13556	0.13888	0.17979	0.16251
3479.4	0.13327	0.13364	0.13887	0.17951	0.16148
3479.5	0.13487	0.13319	0.13886	0.17892	0.1611
3479.6	0.13531	0.13339	0.13954	0.17785	0.16153
3479.7	0.13474	0.1337	0.14003	0.17761	0.1627
3479.8	0.13426	0.1337	0.14002	0.17799	0.16328
3479.9	0.13438	0.13332	0.1403	0.17834	0.16549
3480	0.13429	0.1331	0.14145	0.17903	0.16979
3480.1	0.13363	0.13366	0.14172	0.17971	0.17263
3480.2	0.13384	0.13455	0.13914	0.18004	0.1718
3480.3	0.13521	0.13541	0.13575	0.18036	0.16935
3480.4	0.13613	0.13677	0.13459	0.1812	0.16788
3480.5	0.13678	0.13799	0.13572	0.18164	0.16548
3480.6	0.13798	0.13814	0.1378	0.18108	0.16347
3480.7	0.13866	0.1376	0.13856	0.18116	0.16479
3480.8	0.13797	0.13734	0.13727	0.18215	0.16431
3480.9	0.1366	0.13796	0.13639	0.18212	0.16041
3481	0.13612	0.13876	0.1358	0.18096	0.15886
3481.1	0.13658	0.13908	0.13514	0.18014	0.15868
3481.2	0.13706	0.1388	0.13577	0.17988	0.15815
3481.3	0.13781	0.13746	0.13663	0.17993	0.16154
3481.4	0.13853	0.13527	0.13656	0.18029	0.16708
3481.5	0.138	0.1338	0.13588	0.18045	0.16916
3481.6	0.13712	0.13436	0.13544	0.17948	0.16935
3481.7	0.13726	0.13622	0.13602	0.1783	0.16785
3481.8	0.13679	0.1382	0.13658	0.17832	0.16256
3481.9	0.13478	0.13994	0.13574	0.17902	0.15784
3482	0.13309	0.14116	0.13416	0.17994	0.15655
3482.1	0.13239	0.14155	0.13436	0.18082	0.15775
3482.2	0.13189	0.14084	0.13633	0.18126	0.16106
3482.3	0.13146	0.13956	0.13725	0.18101	0.16389
3482.4	0.13065	0.13835	0.13711	0.17985	0.16505
3482.5	0.12931	0.13731	0.13693	0.17843	0.16446
3482.6	0.12882	0.13665	0.13706	0.17789	0.1606
3482.7	0.12947	0.13674	0.13765	0.17847	0.15721
3482.8	0.12985	0.13719	0.1375	0.17935	0.15713
3482.9	0.13021	0.13744	0.13634	0.17992	0.15793
3483	0.13146	0.13748	0.13548	0.18075	0.15919
3483.1	0.13313	0.13677	0.13595	0.18141	0.16219
3483.2	0.13519	0.13585	0.13676	0.18103	0.16575
3483.3	0.13735	0.13592	0.13675	0.18077	0.16691
3483.4	0.1384	0.13701	0.13641	0.18144	0.16562
3483.5	0.13819	0.13841	0.13562	0.18215	0.16491
3483.6	0.13762	0.13944	0.13478	0.18244	0.16616
3483.7	0.13699	0.13958	0.13453	0.18215	0.1696
3483.8	0.13635	0.13909	0.1345	0.18124	0.17271
3483.9	0.13576	0.13925	0.13461	0.18049	0.17192
3484	0.13463	0.14021	0.13464	0.17998	0.16924
3484.1	0.13365	0.1408	0.13443	0.1794	0.16743
3484.2	0.13404	0.14029	0.13484	0.17874	0.16621
3484.3	0.13483	0.13872	0.13594	0.17831	0.16691
3484.4	0.13534	0.13658	0.13684	0.1788	0.17008
3484.5	0.13596	0.13501	0.13779	0.17965	0.17172
3484.6	0.13637	0.13507	0.1378	0.17993	0.16943
3484.7	0.13606	0.1365	0.13657	0.18025	0.16509
3484.8	0.13589	0.13853	0.13586	0.18076	0.16226
3484.9	0.13656	0.14058	0.1345	0.18064	0.16038
3485	0.13653	0.14175	0.13276	0.17998	0.15771
3485.1	0.13581	0.14143	0.13326	0.17921	0.15777
3485.2	0.1363	0.14025	0.13539	0.17853	0.1604
3485.3	0.13769	0.13963	0.13732	0.17814	0.16165
3485.4	0.1385	0.14	0.13791	0.17819	0.16093
3485.5	0.13851	0.14026	0.13724	0.17856	0.16034
3485.6	0.13762	0.13986	0.13722	0.17849	0.16153
3485.7	0.13615	0.1396	0.13843	0.17786	0.162
3485.8	0.13541	0.13936	0.13931	0.17736	0.15984
3485.9	0.13572	0.1384	0.13929	0.17691	0.15747
3486	0.13579	0.13717	0.1387	0.1768	0.15686
3486.1	0.13478	0.13641	0.13833	0.17721	0.15804
3486.2	0.13385	0.13589	0.13956	0.17823	0.16066
3486.3	0.13354	0.13514	0.14087	0.18059	0.16598
3486.4	0.13284	0.13404	0.13988	0.18332	0.17149
3486.5	0.13221	0.1328	0.13778	0.18452	0.17245
3486.6	0.13263	0.13226	0.13649	0.18416	0.17138
3486.7	0.13345	0.13266	0.13587	0.18308	0.17073
3486.8	0.13427	0.13349	0.13375	0.18164	0.17028
3486.9	0.13595	0.13457	0.13114	0.18038	0.17001
3487	0.1384	0.13559	0.1321	0.17977	0.16775
3487.1	0.14011	0.13585	0.13622	0.17966	0.16333
3487.2	0.14039	0.13541	0.14018	0.17979	0.15917
3487.3	0.14007	0.13484	0.14213	0.18026	0.15852
3487.4	0.13933	0.13458	0.14205	0.18054	0.16312
3487.5	0.13799	0.13549	0.14052	0.18056	0.16757
3487.6	0.13723	0.13647	0.13867	0.18109	0.16529
3487.7	0.13723	0.13596	0.13789	0.18184	0.15833
3487.8	0.13599	0.13499	0.13756	0.18232	0.1536
3487.9	0.1338	0.13493	0.13734	0.1823	0.15485
3488	0.13295	0.13543	0.13832	0.18169	0.15933
3488.1	0.13285	0.13596	0.13969	0.18128	0.16164
3488.2	0.13229	0.13669	0.14032	0.18148	0.15954
3488.3	0.13187	0.13748	0.14024	0.18196	0.15659
3488.4	0.13242	0.13781	0.13946	0.18253	0.15744
3488.5	0.13419	0.13767	0.13808	0.18264	0.16049
3488.6	0.13617	0.13794	0.13637	0.18195	0.1636
3488.7	0.13733	0.13837	0.13602	0.18124	0.16693
3488.8	0.13754	0.13805	0.13847	0.18048	0.16909
3488.9	0.13615	0.1375	0.14228	0.17972	0.17013
3489	0.13423	0.13721	0.14525	0.17943	0.17108
3489.1	0.13384	0.13748	0.14649	0.17939	0.17139
3489.2	0.13449	0.13887	0.14585	0.17997	0.1706
3489.3	0.13487	0.14043	0.14454	0.18121	0.16861
3489.4	0.13454	0.14135	0.14359	0.18264	0.16567
3489.5	0.13392	0.14171	0.14233	0.18369	0.16489
3489.6	0.13382	0.14101	0.14094	0.18396	0.16744
3489.7	0.13391	0.13929	0.13972	0.18407	0.168
3489.8	0.13373	0.13743	0.1389	0.18415	0.16475
3489.9	0.13368	0.13685	0.13867	0.18364	0.16217
3490	0.1339	0.13747	0.13833	0.18239	0.1618
3490.1	0.13406	0.13811	0.13815	0.18139	0.16194
3490.2	0.13428	0.13876	0.13868	0.18187	0.16224
3490.3	0.13493	0.13958	0.13878	0.18258	0.16061
3490.4	0.13593	0.14016	0.13849	0.1819	0.15723
3490.5	0.13737	0.13969	0.13916	0.18043	0.15645
3490.6	0.13883	0.13857	0.14053	0.1795	0.15845
3490.7	0.13987	0.13791	0.14131	0.17939	0.16131
3490.8	0.14099	0.13768	0.14073	0.17961	0.16438
3490.9	0.14183	0.13695	0.13988	0.18025	0.16668
3491	0.14175	0.1359	0.14002	0.18117	0.16785
3491.1	0.14141	0.13586	0.13963	0.18137	0.16737
3491.2	0.14114	0.13662	0.13808	0.18056	0.16609
3491.3	0.14036	0.13734	0.13813	0.18	0.16506
3491.4	0.1389	0.1375	0.14046	0.17987	0.16281
3491.5	0.137	0.13739	0.14189	0.17925	0.15983
3491.6	0.13562	0.13767	0.14056	0.17829	0.15818
3491.7	0.13516	0.13753	0.13822	0.17808	0.15811
3491.8	0.13499	0.13679	0.13777	0.17889	0.15933
3491.9	0.13531	0.1367	0.13961	0.17973	0.16148
3492	0.13615	0.13762	0.14125	0.18023	0.1629
3492.1	0.13686	0.13858	0.14152	0.18033	0.16286
3492.2	0.1369	0.13859	0.14145	0.18027	0.16247
3492.3	0.1357	0.13747	0.14141	0.18079	0.16271
3492.4	0.13394	0.1367	0.14094	0.18169	0.1647
3492.5	0.13356	0.1373	0.14043	0.18181	0.16756
3492.6	0.1349	0.13807	0.1407	0.18102	0.16879
3492.7	0.13611	0.13869	0.14183	0.18007	0.16936
3492.8	0.13616	0.1391	0.14347	0.17898	0.16978
3492.9	0.13571	0.13865	0.14426	0.17784	0.1689
3493	0.13576	0.13811	0.1436	0.17711	0.16926
3493.1	0.13625	0.13773	0.14259	0.17667	0.17096
3493.2	0.13596	0.13687	0.14058	0.17662	0.16959
3493.3	0.13495	0.13529	0.13689	0.17725	0.16765
3493.4	0.1341	0.13359	0.13446	0.17771	0.17008
3493.5	0.13328	0.13302	0.13485	0.17785	0.17433
3493.6	0.13286	0.13295	0.13661	0.17862	0.17523
3493.7	0.13316	0.13252	0.13894	0.1795	0.1701
3493.8	0.13348	0.13245	0.14121	0.17934	0.16375
3493.9	0.13331	0.13273	0.14277	0.17846	0.16239
3494	0.13287	0.13304	0.14289	0.17815	0.16476
3494.1	0.13308	0.13363	0.14188	0.17833	0.16612
3494.2	0.13436	0.1344	0.14037	0.17846	0.16575
3494.3	0.13558	0.1353	0.13867	0.17891	0.16753
3494.4	0.13589	0.13577	0.13833	0.17941	0.16984
3494.5	0.13573	0.13588	0.13908	0.17975	0.16896
3494.6	0.13541	0.13634	0.13934	0.18033	0.1657
3494.7	0.1356	0.13616	0.13846	0.18051	0.16184
3494.8	0.13608	0.13544	0.13661	0.17972	0.16042
3494.9	0.136	0.13522	0.13544	0.17893	0.16158

## Sheet: Extended Data Fig. 1. a
	Absorbance & photoluminescence spectroscopy
	Absorption	Fluorescence
350	1.37762	-
351	1.34643	-
352	1.31419	-
353	1.28196	-
354	1.24703	-
355	1.21375	-
356	1.18305	-
357	1.15039	-
358	1.1203	-
359	1.08947	-
360	1.0581	-
361	1.02911	-
362	0.99877	-
363	0.97163	-
364	0.94393	-
365	0.91849	-
366	0.89129	-
367	0.86573	-
368	0.84171	-
369	0.81628	-
370	0.79397	-
371	0.77056	-
372	0.74721	-
373	0.72521	-
374	0.70389	-
375	0.68287	-
376	0.66509	-
377	0.64751	-
378	0.63084	-
379	0.61368	-
380	0.59774	-
381	0.58328	-
382	0.56864	-
383	0.55816	-
384	0.54774	-
385	0.5383	-
386	0.52874	-
387	0.522	-
388	0.51655	-
389	0.51232	-
390	0.50901	-
391	0.50729	-
392	0.50631	-
393	0.50668	-
394	0.50772	-
395	0.5106	-
396	0.51391	-
397	0.51796	-
398	0.52267	-
399	0.52991	-
400	0.53677	-
401	0.54547	-
402	0.55454	-
403	0.56404	-
404	0.57446	-
405	0.58543	-
406	0.59787	-
407	0.61055	-
408	0.62434	-
409	0.63739	-
410	0.65131	-
411	0.66473	-
412	0.6798	-
413	0.69298	-
414	0.70775	-
415	0.72233	-
416	0.73716	-
417	0.75083	-
418	0.76517	-
419	0.7803	-
420	0.7936	-
421	0.8077	-
422	0.82216	-
423	0.83472	-
424	0.84778	-
425	0.86138	-
426	0.8729	-
427	0.88497	-
428	0.89729	-
429	0.90783	-
430	0.91739	-
431	0.92775	-
432	0.93768	-
433	0.94668	-
434	0.95441	-
435	0.9617	-
436	0.96832	-
437	0.97543	-
438	0.98027	-
439	0.98505	-
440	0.98872	-
441	0.99283	-
442	0.99528	-
443	0.99718	-
444	0.99945	-
445	0.99914	-
446	1	-
447	0.99988	-
448	0.9989	-
449	0.99816	-
450	0.99638	-
451	0.99295	-
452	0.98964	-
453	0.98584	-
454	0.98155	-
455	0.97659	-
456	0.97138	-
457	0.96525	-
458	0.95833	-
459	0.95177	-
460	0.94448	-
461	0.93682	-
462	0.92812	-
463	0.92058	-
464	0.91114	-
465	0.90219	-
466	0.89276	-
467	0.88185	-
468	0.8718	-
469	0.86163	-
470	0.85072	-
471	0.84012	-
472	0.8289	-
473	0.81634	-
474	0.8042	-
475	0.79201	-
476	0.77957	-
477	0.76707	-
478	0.7534	-
479	0.74053	-
480	0.72699	-
481	0.71369	-
482	0.70015	-
483	0.68538	-
484	0.67263	-
485	0.65897	-
486	0.64518	-
487	0.63102	-
488	0.61827	-
489	0.60473	-
490	0.59174	-
491	0.57728	-
492	0.56294	-
493	0.54805	-
494	0.53462	-
495	0.5209	-
496	0.50692	-
497	0.49228	-
498	0.47806	-
499	0.46415	-
500	0.44932	-
501	0.4367	-
502	0.42291	-
503	0.40967	-
504	0.39637	-
505	0.3835	-
506	0.37069	-
507	0.35752	-
508	0.34594	-
509	0.33307	-
510	0.32106	-
511	0.3099	-
512	0.29777	-
513	0.28625	-
514	0.27497	-
515	0.26388	0.11991
516	0.25291	0.11991
517	0.24219	0.12725
518	0.23091	0.12882
519	0.22068	0.13197
520	0.21044	0.13511
521	0.2007	0.13459
522	0.19022	0.14297
523	0.1809	0.14926
524	0.17153	0.1608
525	0.16209	0.15608
526	0.1529	0.16604
527	0.14512	0.17338
528	0.13648	0.17442
529	0.1279	0.19225
530	0.12017	0.18596
531	0.11307	0.1891
532	0.10528	0.21269
533	0.09891	0.20535
534	0.09217	0.2216
535	0.08629	0.23051
536	0.08003	0.2237
537	0.07342	0.22317
538	0.0668	0.2368
539	0.06189	0.23208
540	0.05626	0.24781
541	0.05123	0.24257
542	0.04541	0.25043
543	0.04038	0.26091
544	0.0353	0.26668
545	0.03095	0.26144
546	0.02654	0.2693
547	0.02255	0.2693
548	0.01937	0.28345
549	0.01489	0.30285
550	0.01238	0.29289
551	0.00882	0.29656
552	0.00545	0.31333
553	0.00306	0.317
554	-0.000122564	0.31805
555	-0.00325	0.33639
556	-0.00533	0.33273
557	-0.00748	0.35841
558	-0.0106	0.34635
559	-0.0122	0.3668
560	-0.01416	0.37938
561	-0.01636	0.40454
562	-0.01765	0.4255
563	-0.01924	0.42446
564	-0.02059	0.44804
565	-0.02212	0.45119
566	-0.02378	0.45538
567	-0.02537	0.47897
568	-0.02635	0.50728
569	-0.02709	0.51199
570	-0.02862	0.52982
571	-0.02972	0.55602
572	-0.03076	0.55235
573	-0.03138	0.57647
574	-0.03242	0.58747
575	-0.03291	0.62417
576	-0.03321	0.63832
577	-0.0345	0.62836
578	-0.03475	0.64409
579	-0.0353	0.66977
580	-0.03622	0.68916
581	-0.03677	0.69965
582	-0.0372	0.71013
583	-0.03732	0.72481
584	-0.03769	0.72586
585	-0.03793	0.74315
586	-0.03775	0.76936
587	-0.03836	0.78299
588	-0.03879	0.77094
589	-0.03867	0.81916
590	-0.0394	0.80658
591	-0.03879	0.79819
592	-0.03959	0.80658
593	-0.03959	0.85061
594	-0.03947	0.86057
595	-0.04008	0.83174
596	-0.03996	0.87629
597	-0.04002	0.86948
598	-0.04075	0.89202
599	-0.04014	0.92399
600	-0.04026	0.87367
601	-	0.90303
602	-	0.94182
603	-	0.92924
604	-	0.94496
605	-	0.93553
606	-	0.93028
607	-	0.97851
608	-	0.97956
609	-	0.97851
610	-	0.97012
611	-	0.96907
612	-	0.96436
613	-	0.9848
614	-	0.97851
615	-	0.98165
616	-	0.99685
617	-	0.99738
618	-	0.99528
619	-	0.98427
620	-	0.96698
621	-	1
622	-	0.97432
623	-	0.9827
624	-	0.97851
625	-	0.98794
626	-	0.99528
627	-	0.96488
628	-	0.95335
629	-	0.9696
630	-	0.96855
631	-	0.93972
632	-	0.92557
633	-	0.94863
634	-	0.92452
635	-	0.91456
636	-	0.935
637	-	0.90879
638	-	0.91508
639	-	0.90146
640	-	0.9046
641	-	0.88625
642	-	0.86634
643	-	0.86581
644	-	0.86529
645	-	0.87525
646	-	0.83803
647	-	0.84117
648	-	0.81287
649	-	0.82597
650	-	0.78614
651	-	0.80972
652	-	0.78352
653	-	0.7919
654	-	0.78404
655	-	0.7269
656	-	0.75154
657	-	0.73844
658	-	0.73057
659	-	0.73529
660	-	0.7138
661	-	0.67973
662	-	0.6855
663	-	0.68235
664	-	0.68497
665	-	0.6792
666	-	0.65719
667	-	0.62417
668	-	0.62836
669	-	0.62207
670	-	0.61421
671	-	0.6011
672	-	0.60897
673	-	0.57856
674	-	0.58643
675	-	0.55917
676	-	0.55602
677	-	0.55602
678	-	0.5424
679	-	0.54869
680	-	0.52352
681	-	0.5078
682	-	0.49365
683	-	0.48945
684	-	0.48578
685	-	0.47111
686	-	0.46482
687	-	0.43913
688	-	0.46534
689	-	0.42655
690	-	0.43599
691	-	0.4276
692	-	0.41921
693	-	0.42236
694	-	0.38829
695	-	0.39877
696	-	0.39038
697	-	0.38409
698	-	0.35893
699	-	0.38043
700	-	0.35474
701	-	0.34583
702	-	0.34111
703	-	0.33639
704	-	0.3343
705	-	0.32119
706	-	0.3191
707	-	0.31385
708	-	0.31385
709	-	0.28869
710	-	0.29394
711	-	0.29551
712	-	0.28712
713	-	0.27192
714	-	0.25986
715	-	0.25986
716	-	0.25305
717	-	0.24991
718	-	0.24414
719	-	0.2562
720	-	0.2389
721	-	0.22422
722	-	0.22632
723	-	0.22265
724	-	0.20116
725	-	0.20954
726	-	0.20116
727	-	0.19696
728	-	0.19644
729	-	0.19434
730	-	0.18858
731	-	0.18543
732	-	0.1739
733	-	0.17128
734	-	0.1739
735	-	0.16918
736	-	0.16394
737	-	0.16499
738	-	0.15346
739	-	0.14612
740	-	0.15398
741	-	0.14664
742	-	0.14507
743	-	0.13354
744	-	0.12672
745	-	0.1393
746	-	0.13354
747	-	0.12515
748	-	0.12987
749	-	0.11939
750	-	0.12725
751	-	0.11362
752	-	0.12725
753	-	0.11205
754	-	0.10785
755	-	0.10681
756	-	0.10785
757	-	0.10681
758	-	0.10419
759	-	0.09423
760	-	0.09265
761	-	0.09003
762	-	0.08374
763	-	0.08689
764	-	0.08741
765	-	0.08322
766	-	0.08112
767	-	0.0785
768	-	0.07798
769	-	0.07431
770	-	0.07273
771	-	0.07169
772	-	0.07169
773	-	0.06854
774	-	0.06644
775	-	0.05701
776	-	0.06907
777	-	0.06225
778	-	0.05806
779	-	0.05596
780	-	0.06435
781	-	0.06068
782	-	0.0612
783	-	0.05124
784	-	0.05649
785	-	0.04967
786	-	0.04967
787	-	0.04915
788	-	0.04757
789	-	0.05124
790	-	0.04076
791	-	0.04338
792	-	0.05229
793	-	0.04443
794	-	0.04286
795	-	0.03709
796	-	0.04653
797	-	0.04233
798	-	0.04286
799	-	0.04286
800	-	0.04024

## Sheet: Extended Data Fig. 1. b
	Cyclic voltammetry (CV)
	Blank		BTP
	Energy /V	Current /uA	Energy /V	Current /uA		Electrolyte: 1xPBS
	0.86261	0.129	0.86261	-0.353		WE: GC
	0.86061	0.058	0.86061	-0.184		RE: Ag/AgCl (-37 mV vs Ag/AgCl)
	0.85861	0.038	0.85861	-0.138		CE: Pt-wire
	0.85661	0.026	0.85661	-0.108
	0.85461	0.019	0.85461	-0.114		pH = 7.24
	0.85261	0.014	0.85261	-0.108		0.0592*7.24 = 0.4286
	0.85061	0.01	0.85061	-0.102
	0.84861	0.007	0.84861	-0.098		0.197+0.4286 = 0.625608
	0.84661	0.005	0.84661	-0.102		0.625608 + 37 mV = 0.662608
	0.84461	0.002	0.84461	-0.101
	0.84261	0	0.84261	-0.099		Scan rate: 10 mV/s
	0.84061	-0.001	0.84061	-0.099
	0.83861	-0.003	0.83861	-0.099
	0.83661	-0.004	0.83661	-0.1
	0.83461	-0.005	0.83461	-0.101
	0.83261	-0.006	0.83261	-0.101
	0.83061	-0.007	0.83061	-0.103
	0.82861	-0.008	0.82861	-0.104
	0.82661	-0.009	0.82661	-0.105
	0.82461	-0.01	0.82461	-0.107
	0.82261	-0.01	0.82261	-0.109
	0.82061	-0.01	0.82061	-0.109
	0.81861	-0.012	0.81861	-0.112
	0.81661	-0.012	0.81661	-0.114
	0.81461	-0.013	0.81461	-0.115
	0.81261	-0.014	0.81261	-0.117
	0.81061	-0.014	0.81061	-0.119
	0.80861	-0.015	0.80861	-0.121
	0.80661	-0.016	0.80661	-0.124
	0.80461	-0.016	0.80461	-0.127
	0.80261	-0.017	0.80261	-0.129
	0.80061	-0.018	0.80061	-0.128
	0.79861	-0.018	0.79861	-0.132
	0.79661	-0.018	0.79661	-0.133
	0.79461	-0.019	0.79461	-0.137
	0.79261	-0.02	0.79261	-0.14
	0.79061	-0.02	0.79061	-0.141
	0.78861	-0.021	0.78861	-0.144
	0.78661	-0.022	0.78661	-0.147
	0.78461	-0.022	0.78461	-0.148
	0.78261	-0.023	0.78261	-0.15
	0.78061	-0.024	0.78061	-0.153
	0.77861	-0.024	0.77861	-0.154
	0.77661	-0.025	0.77661	-0.157
	0.77461	-0.025	0.77461	-0.158
	0.77261	-0.026	0.77261	-0.162
	0.77061	-0.027	0.77061	-0.164
	0.76861	-0.027	0.76861	-0.166
	0.76661	-0.027	0.76661	-0.168
	0.76461	-0.028	0.76461	-0.17
	0.76261	-0.028	0.76261	-0.172
	0.76061	-0.029	0.76061	-0.175
	0.75861	-0.03	0.75861	-0.177
	0.75661	-0.03	0.75661	-0.179
	0.75461	-0.031	0.75461	-0.182
	0.75261	-0.031	0.75261	-0.182
	0.75061	-0.032	0.75061	-0.185
	0.74861	-0.032	0.74861	-0.187
	0.74661	-0.033	0.74661	-0.188
	0.74461	-0.033	0.74461	-0.19
	0.74261	-0.034	0.74261	-0.192
	0.74061	-0.034	0.74061	-0.193
	0.73861	-0.035	0.73861	-0.196
	0.73661	-0.036	0.73661	-0.195
	0.73461	-0.036	0.73461	-0.199
	0.73261	-0.037	0.73261	-0.201
	0.73061	-0.037	0.73061	-0.203
	0.72861	-0.038	0.72861	-0.203
	0.72661	-0.038	0.72661	-0.207
	0.72461	-0.039	0.72461	-0.208
	0.72261	-0.04	0.72261	-0.209
	0.72061	-0.04	0.72061	-0.212
	0.71861	-0.041	0.71861	-0.212
	0.71661	-0.041	0.71661	-0.216
	0.71461	-0.042	0.71461	-0.218
	0.71261	-0.042	0.71261	-0.219
	0.71061	-0.043	0.71061	-0.221
	0.70861	-0.044	0.70861	-0.223
	0.70661	-0.044	0.70661	-0.225
	0.70461	-0.045	0.70461	-0.227
	0.70261	-0.045	0.70261	-0.229
	0.70061	-0.046	0.70061	-0.231
	0.69861	-0.047	0.69861	-0.233
	0.69661	-0.048	0.69661	-0.235
	0.69461	-0.048	0.69461	-0.237
	0.69261	-0.049	0.69261	-0.239
	0.69061	-0.05	0.69061	-0.241
	0.68861	-0.05	0.68861	-0.242
	0.68661	-0.051	0.68661	-0.247
	0.68461	-0.052	0.68461	-0.248
	0.68261	-0.052	0.68261	-0.249
	0.68061	-0.053	0.68061	-0.251
	0.67861	-0.054	0.67861	-0.253
	0.67661	-0.055	0.67661	-0.254
	0.67461	-0.055	0.67461	-0.257
	0.67261	-0.056	0.67261	-0.257
	0.67061	-0.057	0.67061	-0.259
	0.66861	-0.058	0.66861	-0.263
	0.66661	-0.058	0.66661	-0.263
	0.66461	-0.059	0.66461	-0.267
	0.66261	-0.06	0.66261	-0.269
	0.66061	-0.061	0.66061	-0.269
	0.65861	-0.061	0.65861	-0.272
	0.65661	-0.062	0.65661	-0.272
	0.65461	-0.063	0.65461	-0.276
	0.65261	-0.064	0.65261	-0.277
	0.65061	-0.064	0.65061	-0.28
	0.64861	-0.065	0.64861	-0.281
	0.64661	-0.066	0.64661	-0.286
	0.64461	-0.067	0.64461	-0.286
	0.64261	-0.068	0.64261	-0.287
	0.64061	-0.068	0.64061	-0.291
	0.63861	-0.069	0.63861	-0.293
	0.63661	-0.07	0.63661	-0.296
	0.63461	-0.071	0.63461	-0.297
	0.63261	-0.072	0.63261	-0.3
	0.63061	-0.073	0.63061	-0.301
	0.62861	-0.074	0.62861	-0.304
	0.62661	-0.075	0.62661	-0.304
	0.62461	-0.076	0.62461	-0.305
	0.62261	-0.077	0.62261	-0.309
	0.62061	-0.078	0.62061	-0.309
	0.61861	-0.079	0.61861	-0.312
	0.61661	-0.079	0.61661	-0.315
	0.61461	-0.081	0.61461	-0.319
	0.61261	-0.082	0.61261	-0.319
	0.61061	-0.083	0.61061	-0.321
	0.60861	-0.084	0.60861	-0.321
	0.60661	-0.085	0.60661	-0.326
	0.60461	-0.086	0.60461	-0.326
	0.60261	-0.087	0.60261	-0.329
	0.60061	-0.088	0.60061	-0.331
	0.59861	-0.09	0.59861	-0.333
	0.59661	-0.09	0.59661	-0.334
	0.59461	-0.092	0.59461	-0.338
	0.59261	-0.093	0.59261	-0.34
	0.59061	-0.094	0.59061	-0.342
	0.58861	-0.095	0.58861	-0.345
	0.58661	-0.097	0.58661	-0.346
	0.58461	-0.098	0.58461	-0.349
	0.58261	-0.099	0.58261	-0.351
	0.58061	-0.101	0.58061	-0.352
	0.57861	-0.102	0.57861	-0.354
	0.57661	-0.103	0.57661	-0.359
	0.57461	-0.105	0.57461	-0.359
	0.57261	-0.106	0.57261	-0.365
	0.57061	-0.108	0.57061	-0.367
	0.56861	-0.109	0.56861	-0.37
	0.56661	-0.11	0.56661	-0.373
	0.56461	-0.112	0.56461	-0.374
	0.56261	-0.114	0.56261	-0.377
	0.56061	-0.115	0.56061	-0.379
	0.55861	-0.117	0.55861	-0.384
	0.55661	-0.118	0.55661	-0.385
	0.55461	-0.12	0.55461	-0.386
	0.55261	-0.121	0.55261	-0.391
	0.55061	-0.123	0.55061	-0.394
	0.54861	-0.125	0.54861	-0.394
	0.54661	-0.127	0.54661	-0.399
	0.54461	-0.128	0.54461	-0.402
	0.54261	-0.13	0.54261	-0.406
	0.54061	-0.132	0.54061	-0.41
	0.53861	-0.134	0.53861	-0.412
	0.53661	-0.136	0.53661	-0.417
	0.53461	-0.138	0.53461	-0.42
	0.53261	-0.14	0.53261	-0.423
	0.53061	-0.142	0.53061	-0.427
	0.52861	-0.144	0.52861	-0.432
	0.52661	-0.146	0.52661	-0.434
	0.52461	-0.148	0.52461	-0.44
	0.52261	-0.151	0.52261	-0.443
	0.52061	-0.153	0.52061	-0.448
	0.51861	-0.155	0.51861	-0.453
	0.51661	-0.158	0.51661	-0.456
	0.51461	-0.16	0.51461	-0.463
	0.51261	-0.162	0.51261	-0.466
	0.51061	-0.165	0.51061	-0.472
	0.50861	-0.168	0.50861	-0.479
	0.50661	-0.17	0.50661	-0.482
	0.50461	-0.173	0.50461	-0.488
	0.50261	-0.176	0.50261	-0.496
	0.50061	-0.179	0.50061	-0.501
	0.49861	-0.182	0.49861	-0.509
	0.49661	-0.184	0.49661	-0.514
	0.49461	-0.188	0.49461	-0.522
	0.49261	-0.19	0.49261	-0.529
	0.49061	-0.194	0.49061	-0.535
	0.48861	-0.197	0.48861	-0.543
	0.48661	-0.2	0.48661	-0.552
	0.48461	-0.203	0.48461	-0.558
	0.48261	-0.207	0.48261	-0.568
	0.48061	-0.21	0.48061	-0.575
	0.47861	-0.214	0.47861	-0.585
	0.47661	-0.217	0.47661	-0.595
	0.47461	-0.221	0.47461	-0.604
	0.47261	-0.225	0.47261	-0.613
	0.47061	-0.228	0.47061	-0.625
	0.46861	-0.233	0.46861	-0.633
	0.46661	-0.237	0.46661	-0.646
	0.46461	-0.24	0.46461	-0.654
	0.46261	-0.247	0.46261	-0.668
	0.46061	-0.249	0.46061	-0.679
	0.45861	-0.253	0.45861	-0.692
	0.45661	-0.258	0.45661	-0.705
	0.45461	-0.262	0.45461	-0.718
	0.45261	-0.266	0.45261	-0.732
	0.45061	-0.271	0.45061	-0.746
	0.44861	-0.276	0.44861	-0.76
	0.44661	-0.281	0.44661	-0.775
	0.44461	-0.286	0.44461	-0.789
	0.44261	-0.291	0.44261	-0.804
	0.44061	-0.296	0.44061	-0.82
	0.43861	-0.301	0.43861	-0.837
	0.43661	-0.307	0.43661	-0.852
	0.43461	-0.313	0.43461	-0.87
	0.43261	-0.319	0.43261	-0.888
	0.43061	-0.324	0.43061	-0.908
	0.42861	-0.33	0.42861	-0.926
	0.42661	-0.336	0.42661	-0.945
	0.42461	-0.342	0.42461	-0.964
	0.42261	-0.349	0.42261	-0.985
	0.42061	-0.355	0.42061	-1.004
	0.41861	-0.362	0.41861	-1.025
	0.41661	-0.368	0.41661	-1.044
	0.41461	-0.376	0.41461	-1.067
	0.41261	-0.383	0.41261	-1.089
	0.41061	-0.39	0.41061	-1.112
	0.40861	-0.398	0.40861	-1.134
	0.40661	-0.405	0.40661	-1.158
	0.40461	-0.413	0.40461	-1.182
	0.40261	-0.421	0.40261	-1.206
	0.40061	-0.429	0.40061	-1.229
	0.39861	-0.437	0.39861	-1.257
	0.39661	-0.446	0.39661	-1.28
	0.39461	-0.455	0.39461	-1.306
	0.39261	-0.463	0.39261	-1.333
	0.39061	-0.473	0.39061	-1.358
	0.38861	-0.482	0.38861	-1.384
	0.38661	-0.491	0.38661	-1.411
	0.38461	-0.501	0.38461	-1.438
	0.38261	-0.511	0.38261	-1.466
	0.38061	-0.521	0.38061	-1.494
	0.37861	-0.531	0.37861	-1.519
	0.37661	-0.542	0.37661	-1.547
	0.37461	-0.553	0.37461	-1.576
	0.37261	-0.564	0.37261	-1.602
	0.37061	-0.576	0.37061	-1.632
	0.36861	-0.587	0.36861	-1.659
	0.36661	-0.599	0.36661	-1.687
	0.36461	-0.611	0.36461	-1.717
	0.36261	-0.624	0.36261	-1.744
	0.36061	-0.636	0.36061	-1.772
	0.35861	-0.649	0.35861	-1.802
	0.35661	-0.662	0.35661	-1.826
	0.35461	-0.676	0.35461	-1.855
	0.35261	-0.689	0.35261	-1.882
	0.35061	-0.703	0.35061	-1.911
	0.34861	-0.718	0.34861	-1.937
	0.34661	-0.732	0.34661	-1.966
	0.34461	-0.747	0.34461	-1.992
	0.34261	-0.762	0.34261	-2.019
	0.34061	-0.777	0.34061	-2.046
	0.33861	-0.793	0.33861	-2.072
	0.33661	-0.809	0.33661	-2.097
	0.33461	-0.825	0.33461	-2.124
	0.33261	-0.842	0.33261	-2.15
	0.33061	-0.858	0.33061	-2.174
	0.32861	-0.876	0.32861	-2.2
	0.32661	-0.893	0.32661	-2.223
	0.32461	-0.911	0.32461	-2.246
	0.32261	-0.929	0.32261	-2.27
	0.32061	-0.947	0.32061	-2.294
	0.31861	-0.966	0.31861	-2.317
	0.31661	-0.985	0.31661	-2.34
	0.31461	-1.005	0.31461	-2.361
	0.31261	-1.024	0.31261	-2.382
	0.31061	-1.044	0.31061	-2.403
	0.30861	-1.064	0.30861	-2.424
	0.30661	-1.084	0.30661	-2.443
	0.30461	-1.105	0.30461	-2.463
	0.30261	-1.126	0.30261	-2.482
	0.30061	-1.147	0.30061	-2.499
	0.29861	-1.169	0.29861	-2.518
	0.29661	-1.191	0.29661	-2.536
	0.29461	-1.213	0.29461	-2.552
	0.29261	-1.236	0.29261	-2.585
	0.29061	-1.258	0.29061	-2.59
	0.28861	-1.281	0.28861	-2.602
	0.28661	-1.305	0.28661	-2.614
	0.28461	-1.328	0.28461	-2.628
	0.28261	-1.352	0.28261	-2.642
	0.28061	-1.376	0.28061	-2.653
	0.27861	-1.401	0.27861	-2.667
	0.27661	-1.425	0.27661	-2.679
	0.27461	-1.45	0.27461	-2.691
	0.27261	-1.475	0.27261	-2.702
	0.27061	-1.501	0.27061	-2.713
	0.26861	-1.526	0.26861	-2.722
	0.26661	-1.552	0.26661	-2.733
	0.26461	-1.579	0.26461	-2.744
	0.26261	-1.605	0.26261	-2.753
	0.26061	-1.631	0.26061	-2.76
	0.25861	-1.658	0.25861	-2.77
	0.25661	-1.686	0.25661	-2.779
	0.25461	-1.713	0.25461	-2.785
	0.25261	-1.741	0.25261	-2.791
	0.25061	-1.768	0.25061	-2.799
	0.24861	-1.796	0.24861	-2.807
	0.24661	-1.824	0.24661	-2.811
	0.24461	-1.852	0.24461	-2.817
	0.24261	-1.88	0.24261	-2.823
	0.24061	-1.909	0.24061	-2.828
	0.23861	-1.938	0.23861	-2.834
	0.23661	-1.966	0.23661	-2.837
	0.23461	-1.996	0.23461	-2.843
	0.23261	-2.025	0.23261	-2.847
	0.23061	-2.054	0.23061	-2.85
	0.22861	-2.083	0.22861	-2.854
	0.22661	-2.113	0.22661	-2.857
	0.22461	-2.143	0.22461	-2.862
	0.22261	-2.173	0.22261	-2.865
	0.22061	-2.203	0.22061	-2.868
	0.21861	-2.233	0.21861	-2.87
	0.21661	-2.263	0.21661	-2.871
	0.21461	-2.293	0.21461	-2.877
	0.21261	-2.323	0.21261	-2.877
	0.21061	-2.353	0.21061	-2.877
	0.20861	-2.383	0.20861	-2.88
	0.20661	-2.413	0.20661	-2.883
	0.20461	-2.443	0.20461	-2.885
	0.20261	-2.474	0.20261	-2.885
	0.20061	-2.503	0.20061	-2.888
	0.19861	-2.533	0.19861	-2.888
	0.19661	-2.563	0.19661	-2.888
	0.19461	-2.593	0.19461	-2.891
	0.19261	-2.622	0.19261	-2.891
	0.19061	-2.668	0.19061	-2.893
	0.18861	-2.685	0.18861	-2.893
	0.18661	-2.711	0.18661	-2.894
	0.18461	-2.739	0.18461	-2.894
	0.18261	-2.768	0.18261	-2.894
	0.18061	-2.796	0.18061	-2.894
	0.17861	-2.823	0.17861	-2.894
	0.17661	-2.853	0.17661	-2.896
	0.17461	-2.879	0.17461	-2.896
	0.17261	-2.907	0.17261	-2.896
	0.17061	-2.934	0.17061	-2.894
	0.16861	-2.962	0.16861	-2.894
	0.16661	-2.988	0.16661	-2.894
	0.16461	-3.013	0.16461	-2.894
	0.16261	-3.039	0.16261	-2.896
	0.16061	-3.065	0.16061	-2.894
	0.15861	-3.09	0.15861	-2.894
	0.15661	-3.114	0.15661	-2.905
	0.15461	-3.139	0.15461	-2.905
	0.15261	-3.162	0.15261	-2.905
	0.15061	-3.185	0.15061	-2.905
	0.14861	-3.208	0.14861	-2.903
	0.14661	-3.231	0.14661	-2.903
	0.14461	-3.253	0.14461	-2.9
	0.14261	-3.273	0.14261	-2.899
	0.14061	-3.293	0.14061	-2.896
	0.13861	-3.314	0.13861	-2.894
	0.13661	-3.333	0.13661	-2.893
	0.13461	-3.353	0.13461	-2.89
	0.13261	-3.369	0.13261	-2.89
	0.13061	-3.386	0.13061	-2.888
	0.12861	-3.405	0.12861	-2.887
	0.12661	-3.422	0.12661	-2.887
	0.12461	-3.437	0.12461	-2.887
	0.12261	-3.452	0.12261	-2.887
	0.12061	-3.466	0.12061	-2.885
	0.11861	-3.479	0.11861	-2.883
	0.11661	-3.492	0.11661	-2.883
	0.11461	-3.506	0.11461	-2.885
	0.11261	-3.517	0.11261	-2.882
	0.11061	-3.529	0.11061	-2.882
	0.10861	-3.539	0.10861	-2.882
	0.10661	-3.549	0.10661	-2.88
	0.10461	-3.559	0.10461	-2.882
	0.10261	-3.566	0.10261	-2.882
	0.10061	-3.574	0.10061	-2.88
	0.09861	-3.583	0.09861	-2.882
	0.09661	-3.589	0.09661	-2.88
	0.09461	-3.595	0.09461	-2.88
	0.09261	-3.602	0.09261	-2.879
	0.09061	-3.606	0.09061	-2.88
	0.08861	-3.609	0.08861	-2.879
	0.08661	-3.614	0.08661	-2.879
	0.08461	-3.617	0.08461	-2.876
	0.08261	-3.62	0.08261	-2.877
	0.08061	-3.622	0.08061	-2.876
	0.07861	-3.623	0.07861	-2.876
	0.07661	-3.625	0.07661	-2.876
	0.07461	-3.625	0.07461	-2.874
	0.07261	-3.626	0.07261	-2.874
	0.07061	-3.626	0.07061	-2.874
	0.06861	-3.625	0.06861	-2.874
	0.06661	-3.625	0.06661	-2.873
	0.06461	-3.623	0.06461	-2.873
	0.06261	-3.622	0.06261	-2.871
	0.06061	-3.619	0.06061	-2.871
	0.05861	-3.615	0.05861	-2.871
	0.05661	-3.612	0.05661	-2.87
	0.05461	-3.611	0.05461	-2.87
	0.05261	-3.606	0.05261	-2.87
	0.05061	-3.603	0.05061	-2.87
	0.04861	-3.599	0.04861	-2.87
	0.04661	-3.594	0.04661	-2.868
	0.04461	-3.589	0.04461	-2.867
	0.04261	-3.585	0.04261	-2.868
	0.04061	-3.58	0.04061	-2.868
	0.03861	-3.575	0.03861	-2.868
	0.03661	-3.569	0.03661	-2.867
	0.03461	-3.563	0.03461	-2.868
	0.03261	-3.559	0.03261	-2.865
	0.03061	-3.552	0.03061	-2.865
	0.02861	-3.546	0.02861	-2.865
	0.02661	-3.54	0.02661	-2.865
	0.02461	-3.532	0.02461	-2.865
	0.02261	-3.526	0.02261	-2.865
	0.02061	-3.52	0.02061	-2.865
	0.01861	-3.512	0.01861	-2.862
	0.01661	-3.506	0.01661	-2.865
	0.01461	-3.499	0.01461	-2.865
	0.01261	-3.491	0.01261	-2.863
	0.01061	-3.483	0.01061	-2.863
	0.00861	-3.477	0.00861	-2.862
	0.00661	-3.469	0.00661	-2.862
	0.00461	-3.462	0.00461	-2.862
	0.00261	-3.456	0.00261	-2.862
	0.000608	-3.448	0.000608	-2.86
	-0.00139	-3.44	-0.00139	-2.86
	-0.00339	-3.432	-0.00339	-2.862
	-0.00539	-3.425	-0.00539	-2.86
	-0.00739	-3.417	-0.00739	-2.86
	-0.00939	-3.409	-0.00939	-2.862
	-0.01139	-3.402	-0.01139	-2.86
	-0.01339	-3.394	-0.01339	-2.86
	-0.01539	-3.386	-0.01539	-2.86
	-0.01739	-3.38	-0.01739	-2.859
	-0.01939	-3.371	-0.01939	-2.86
	-0.02139	-3.365	-0.02139	-2.86
	-0.02339	-3.357	-0.02339	-2.859
	-0.02539	-3.349	-0.02539	-2.86
	-0.02739	-3.342	-0.02739	-2.859
	-0.02939	-3.334	-0.02939	-2.859
	-0.03139	-3.328	-0.03139	-2.857
	-0.03339	-3.32	-0.03339	-2.857
	-0.03539	-3.313	-0.03539	-2.859
	-0.03739	-3.305	-0.03739	-2.859
	-0.03939	-3.297	-0.03939	-2.857
	-0.04139	-3.291	-0.04139	-2.859
	-0.04339	-3.283	-0.04339	-2.859
	-0.04539	-3.277	-0.04539	-2.857
	-0.04739	-3.269	-0.04739	-2.857
	-0.04939	-3.263	-0.04939	-2.857
	-0.05139	-3.257	-0.05139	-2.856
	-0.05339	-3.251	-0.05339	-2.856
	-0.05539	-3.243	-0.05539	-2.854
	-0.05739	-3.237	-0.05739	-2.856
	-0.05939	-3.231	-0.05939	-2.856
	-0.06139	-3.223	-0.06139	-2.854
	-0.06339	-3.217	-0.06339	-2.856
	-0.06539	-3.211	-0.06539	-2.854
	-0.06739	-3.205	-0.06739	-2.854
	-0.06939	-3.196	-0.06939	-2.854
	-0.07139	-3.191	-0.07139	-2.854
	-0.07339	-3.185	-0.07339	-2.856
	-0.07539	-3.179	-0.07539	-2.854
	-0.07739	-3.173	-0.07739	-2.853
	-0.07939	-3.166	-0.07939	-2.854
	-0.08139	-3.16	-0.08139	-2.854
	-0.08339	-3.154	-0.08339	-2.853
	-0.08539	-3.15	-0.08539	-2.854
	-0.08739	-3.143	-0.08739	-2.854
	-0.08939	-3.137	-0.08939	-2.853
	-0.09139	-3.133	-0.09139	-2.851
	-0.09339	-3.126	-0.09339	-2.853
	-0.09539	-3.12	-0.09539	-2.851
	-0.09739	-3.114	-0.09739	-2.853
	-0.09939	-3.11	-0.09939	-2.853
	-0.10139	-3.105	-0.10139	-2.853
	-0.10339	-3.099	-0.10339	-2.853
	-0.10539	-3.094	-0.10539	-2.851
	-0.10739	-3.088	-0.10739	-2.851
	-0.10939	-3.083	-0.10939	-2.851
	-0.11139	-3.079	-0.11139	-2.851
	-0.11339	-3.074	-0.11339	-2.851
	-0.11539	-3.07	-0.11539	-2.85
	-0.11739	-3.065	-0.11739	-2.85
	-0.11939	-3.06	-0.11939	-2.85
	-0.12139	-3.057	-0.12139	-2.848
	-0.12339	-3.051	-0.12339	-2.848
	-0.12539	-3.046	-0.12539	-2.848
	-0.12739	-3.042	-0.12739	-2.848
	-0.12939	-3.037	-0.12939	-2.848
	-0.13139	-3.034	-0.13139	-2.847
	-0.13339	-3.028	-0.13339	-2.847
	-0.13539	-3.023	-0.13539	-2.848
	-0.13739	-3.02	-0.13739	-2.847
	-0.13939	-3.017	-0.13939	-2.848
	-0.14139	-3.013	-0.14139	-2.845
	-0.14339	-3.006	-0.14339	-2.847
	-0.14539	-3.003	-0.14539	-2.845
	-0.14739	-2.999	-0.14739	-2.845
	-0.14939	-2.996	-0.14939	-2.843
	-0.15139	-2.991	-0.15139	-2.843
	-0.15339	-2.988	-0.15339	-2.843
	-0.15539	-2.983	-0.15539	-2.843
	-0.15739	-2.98	-0.15739	-2.845
	-0.15939	-2.976	-0.15939	-2.847
	-0.16139	-2.974	-0.16139	-2.845
	-0.16339	-2.968	-0.16339	-2.845
	-0.16539	-2.966	-0.16539	-2.842
	-0.16739	-2.96	-0.16739	-2.842
	-0.16939	-2.959	-0.16939	-2.842
	-0.17139	-2.954	-0.17139	-2.842
	-0.17339	-2.951	-0.17339	-2.842
	-0.17539	-2.947	-0.17539	-2.84
	-0.17739	-2.943	-0.17739	-2.842
	-0.17939	-2.94	-0.17939	-2.84
	-0.18139	-2.937	-0.18139	-2.84
	-0.18339	-2.934	-0.18339	-2.84
	-0.18539	-2.931	-0.18539	-2.84
	-0.18739	-2.928	-0.18739	-2.839
	-0.18939	-2.923	-0.18939	-2.84
	-0.19139	-2.92	-0.19139	-2.842
	-0.19339	-2.917	-0.19339	-2.839
	-0.19539	-2.916	-0.19539	-2.84
	-0.19739	-2.913	-0.19739	-2.839
	-0.19939	-2.908	-0.19939	-2.839
	-0.20139	-2.907	-0.20139	-2.839
	-0.20339	-2.902	-0.20339	-2.84
	-0.20539	-2.9	-0.20539	-2.839
	-0.20739	-2.896	-0.20739	-2.839
	-0.20939	-2.894	-0.20939	-2.839
	-0.21139	-2.893	-0.21139	-2.837
	-0.21339	-2.888	-0.21339	-2.839
	-0.21539	-2.887	-0.21539	-2.837
	-0.21739	-2.885	-0.21739	-2.84
	-0.21939	-2.882	-0.21939	-2.839
	-0.22139	-2.879	-0.22139	-2.839
	-0.22339	-2.876	-0.22339	-2.839
	-0.22539	-2.874	-0.22539	-2.84
	-0.22739	-2.871	-0.22739	-2.842
	-0.22939	-2.87	-0.22939	-2.842
	-0.23139	-2.868	-0.23139	-2.843
	-0.23339	-2.867	-0.23339	-2.843
	-0.23539	-2.865	-0.23539	-2.843
	-0.23739	-2.862	-0.23739	-2.845
	-0.23939	-2.86	-0.23939	-2.843
	-0.24139	-2.857	-0.24139	-2.843
	-0.24339	-2.856	-0.24339	-2.845
	-0.24539	-2.853	-0.24539	-2.847
	-0.24739	-2.851	-0.24739	-2.847
	-0.24939	-2.848	-0.24939	-2.848
	-0.25139	-2.847	-0.25139	-2.85
	-0.25339	-2.845	-0.25339	-2.85
	-0.25539	-2.842	-0.25539	-2.851
	-0.25739	-2.842	-0.25739	-2.854
	-0.25939	-2.837	-0.25939	-2.853
	-0.26139	-2.84	-0.26139	-2.856
	-0.26339	-2.834	-0.26339	-2.857
	-0.26539	-2.837	-0.26539	-2.859
	-0.26739	-2.831	-0.26739	-2.86
	-0.26939	-2.831	-0.26939	-2.862
	-0.27139	-2.828	-0.27139	-2.862
	-0.27339	-2.828	-0.27339	-2.865
	-0.27539	-2.825	-0.27539	-2.868
	-0.27739	-2.823	-0.27739	-2.871
	-0.27939	-2.823	-0.27939	-2.873
	-0.28139	-2.82	-0.28139	-2.876
	-0.28339	-2.82	-0.28339	-2.877
	-0.28539	-2.819	-0.28539	-2.88
	-0.28739	-2.819	-0.28739	-2.883
	-0.28939	-2.817	-0.28939	-2.888
	-0.29139	-2.816	-0.29139	-2.891
	-0.29339	-2.814	-0.29339	-2.894
	-0.29539	-2.814	-0.29539	-2.899
	-0.29739	-2.813	-0.29739	-2.902
	-0.29939	-2.813	-0.29939	-2.905
	-0.30139	-2.813	-0.30139	-2.91
	-0.30339	-2.811	-0.30339	-2.914
	-0.30539	-2.81	-0.30539	-2.919
	-0.30739	-2.81	-0.30739	-2.923
	-0.30939	-2.808	-0.30939	-2.928
	-0.31139	-2.808	-0.31139	-2.933
	-0.31339	-2.808	-0.31339	-2.939
	-0.31539	-2.805	-0.31539	-2.943
	-0.31739	-2.807	-0.31739	-2.95
	-0.31939	-2.805	-0.31939	-2.956
	-0.32139	-2.807	-0.32139	-2.96
	-0.32339	-2.805	-0.32339	-2.966
	-0.32539	-2.805	-0.32539	-2.971
	-0.32739	-2.805	-0.32739	-2.976
	-0.32939	-2.805	-0.32939	-2.983
	-0.33139	-2.805	-0.33139	-2.99
	-0.33339	-2.807	-0.33339	-2.996
	-0.33539	-2.803	-0.33539	-3.002
	-0.33739	-2.802	-0.33739	-3.01
	-0.33939	-2.803	-0.33939	-3.016
	-0.34139	-2.802	-0.34139	-3.023
	-0.34339	-2.805	-0.34339	-3.031
	-0.34539	-2.802	-0.34539	-3.039
	-0.34739	-2.805	-0.34739	-3.045
	-0.34939	-2.803	-0.34939	-3.054
	-0.35139	-2.803	-0.35139	-3.063
	-0.35339	-2.805	-0.35339	-3.07
	-0.35539	-2.805	-0.35539	-3.077
	-0.35739	-2.807	-0.35739	-3.085
	-0.35939	-2.805	-0.35939	-3.093
	-0.36139	-2.807	-0.36139	-3.102
	-0.36339	-2.807	-0.36339	-3.114
	-0.36539	-2.807	-0.36539	-3.122
	-0.36739	-2.807	-0.36739	-3.131
	-0.36939	-2.808	-0.36939	-3.142
	-0.37139	-2.808	-0.37139	-3.153
	-0.37339	-2.81	-0.37339	-3.163
	-0.37539	-2.811	-0.37539	-3.174
	-0.37739	-2.811	-0.37739	-3.186
	-0.37939	-2.813	-0.37939	-3.2
	-0.38139	-2.813	-0.38139	-3.213
	-0.38339	-2.814	-0.38339	-3.225
	-0.38539	-2.814	-0.38539	-3.239
	-0.38739	-2.816	-0.38739	-3.253
	-0.38939	-2.816	-0.38939	-3.268
	-0.39139	-2.817	-0.39139	-3.28
	-0.39339	-2.819	-0.39339	-3.297
	-0.39539	-2.82	-0.39539	-3.314
	-0.39739	-2.819	-0.39739	-3.334
	-0.39939	-2.822	-0.39939	-3.351
	-0.40139	-2.822	-0.40139	-3.369
	-0.40339	-2.825	-0.40339	-3.389
	-0.40539	-2.825	-0.40539	-3.411
	-0.40739	-2.828	-0.40739	-3.436
	-0.40939	-2.828	-0.40939	-3.457
	-0.41139	-2.831	-0.41139	-3.48
	-0.41339	-2.833	-0.41339	-3.508
	-0.41539	-2.834	-0.41539	-3.535
	-0.41739	-2.839	-0.41739	-3.56
	-0.41939	-2.837	-0.41939	-3.592
	-0.42139	-2.842	-0.42139	-3.623
	-0.42339	-2.84	-0.42339	-3.655
	-0.42539	-2.845	-0.42539	-3.689
	-0.42739	-2.845	-0.42739	-3.72
	-0.42939	-2.848	-0.42939	-3.758
	-0.43139	-2.85	-0.43139	-3.797
	-0.43339	-2.853	-0.43339	-3.84
	-0.43539	-2.854	-0.43539	-3.882
	-0.43739	-2.857	-0.43739	-3.921
	-0.43939	-2.859	-0.43939	-3.968
	-0.44139	-2.862	-0.44139	-4.014
	-0.44339	-2.865	-0.44339	-4.061
	-0.44539	-2.867	-0.44539	-4.112
	-0.44739	-2.87	-0.44739	-4.163
	-0.44939	-2.873	-0.44939	-4.215
	-0.45139	-2.874	-0.45139	-4.271
	-0.45339	-2.877	-0.45339	-4.324
	-0.45539	-2.88	-0.45539	-4.38
	-0.45739	-2.883	-0.45739	-4.437
	-0.45939	-2.888	-0.45939	-4.492
	-0.46139	-2.891	-0.46139	-4.552
	-0.46339	-2.894	-0.46339	-4.609
	-0.46539	-2.899	-0.46539	-4.666
	-0.46739	-2.902	-0.46739	-4.724
	-0.46939	-2.907	-0.46939	-4.78
	-0.47139	-2.91	-0.47139	-4.838
	-0.47339	-2.914	-0.47339	-4.896
	-0.47539	-2.917	-0.47539	-4.955
	-0.47739	-2.922	-0.47739	-5.015
	-0.47939	-2.928	-0.47939	-5.075
	-0.48139	-2.931	-0.48139	-5.135
	-0.48339	-2.936	-0.48339	-5.193
	-0.48539	-2.94	-0.48539	-5.255
	-0.48739	-2.945	-0.48739	-5.316
	-0.48939	-2.951	-0.48939	-5.379
	-0.49139	-2.956	-0.49139	-5.441
	-0.49339	-2.963	-0.49339	-5.507
	-0.49539	-2.968	-0.49539	-5.573
	-0.49739	-2.971	-0.49739	-5.645
	-0.49939	-2.979	-0.49939	-5.712
	-0.50139	-2.985	-0.50139	-5.784
	-0.50339	-2.991	-0.50339	-5.856
	-0.50539	-2.997	-0.50539	-5.935
	-0.50739	-3.003	-0.50739	-6.021
	-0.50939	-3.011	-0.50939	-6.102
	-0.51139	-3.017	-0.51139	-6.184
	-0.51339	-3.023	-0.51339	-6.271
	-0.51539	-3.033	-0.51539	-6.354
	-0.51739	-3.039	-0.51739	-6.447
	-0.51939	-3.046	-0.51939	-6.544
	-0.52139	-3.056	-0.52139	-6.642
	-0.52339	-3.062	-0.52339	-6.736
	-0.52539	-3.071	-0.52539	-6.84
	-0.52739	-3.077	-0.52739	-6.945
	-0.52939	-3.09	-0.52939	-7.054
	-0.53139	-3.096	-0.53139	-7.166
	-0.53339	-3.108	-0.53339	-7.279
	-0.53539	-3.116	-0.53539	-7.394
	-0.53739	-3.13	-0.53739	-7.517
	-0.53939	-3.137	-0.53939	-7.635
	-0.54139	-3.148	-0.54139	-7.76
	-0.54339	-3.16	-0.54339	-7.881
	-0.54539	-3.169	-0.54539	-8.008
	-0.54739	-3.183	-0.54739	-8.135
	-0.54939	-3.194	-0.54939	-8.261
	-0.55139	-3.208	-0.55139	-8.39
	-0.55339	-3.219	-0.55339	-8.527
	-0.55539	-3.233	-0.55539	-8.653
	-0.55739	-3.245	-0.55739	-8.786
	-0.55939	-3.259	-0.55939	-8.916
	-0.56139	-3.271	-0.56139	-9.052
	-0.56339	-3.283	-0.56339	-9.162
	-0.56539	-3.302	-0.56539	-9.299
	-0.56739	-3.314	-0.56739	-9.427
	-0.56939	-3.331	-0.56939	-9.562
	-0.57139	-3.343	-0.57139	-9.687
	-0.57339	-3.359	-0.57339	-9.816
	-0.57539	-3.374	-0.57539	-9.941
	-0.57739	-3.388	-0.57739	-10.065
	-0.57939	-3.408	-0.57939	-10.201
	-0.58139	-3.419	-0.58139	-10.317
	-0.58339	-3.44	-0.58339	-10.43
	-0.58539	-3.452	-0.58539	-10.546
	-0.58739	-3.471	-0.58739	-10.65
	-0.58939	-3.486	-0.58939	-10.759
	-0.59139	-3.503	-0.59139	-10.856
	-0.59339	-3.522	-0.59339	-10.957
	-0.59539	-3.537	-0.59539	-11.049
	-0.59739	-3.555	-0.59739	-11.139
	-0.59939	-3.572	-0.59939	-11.223
	-0.60139	-3.589	-0.60139	-11.311
	-0.60339	-3.608	-0.60339	-11.381
	-0.60539	-3.625	-0.60539	-11.455
	-0.60739	-3.642	-0.60739	-11.506
	-0.60939	-3.66	-0.60939	-11.572
	-0.61139	-3.677	-0.61139	-11.626
	-0.61339	-3.695	-0.61339	-11.675
	-0.61539	-3.714	-0.61539	-11.718
	-0.61739	-3.732	-0.61739	-11.76
	-0.61939	-3.751	-0.61939	-11.788
	-0.62139	-3.769	-0.62139	-11.812
	-0.62339	-3.786	-0.62339	-11.826
	-0.62539	-3.806	-0.62539	-11.844
	-0.62739	-3.823	-0.62739	-11.846
	-0.62939	-3.842	-0.62939	-11.844
	-0.63139	-3.858	-0.63139	-11.834
	-0.63339	-3.878	-0.63339	-11.821
	-0.63539	-3.895	-0.63539	-11.769
	-0.63739	-3.914	-0.63739	-11.748
	-0.63939	-3.934	-0.63939	-11.706
	-0.64139	-3.952	-0.64139	-11.669
	-0.64339	-3.971	-0.64339	-11.62
	-0.64539	-3.989	-0.64539	-11.558
	-0.64739	-4.008	-0.64739	-11.497
	-0.64939	-4.026	-0.64939	-11.431
	-0.65139	-4.046	-0.65139	-11.354
	-0.65339	-4.063	-0.65339	-11.272
	-0.65539	-4.081	-0.65539	-11.182
	-0.65739	-4.1	-0.65739	-11.089
	-0.65939	-4.12	-0.65939	-10.989
	-0.66139	-4.138	-0.66139	-10.883
	-0.66339	-4.157	-0.66339	-10.773
	-0.66539	-4.175	-0.66539	-10.663
	-0.66739	-4.194	-0.66739	-10.54
	-0.66939	-4.215	-0.66939	-10.42
	-0.67139	-4.232	-0.67139	-10.294
	-0.67339	-4.252	-0.67339	-10.168
	-0.67539	-4.268	-0.67539	-10.034
	-0.67739	-4.288	-0.67739	-9.902
	-0.67939	-4.306	-0.67939	-9.765
	-0.68139	-4.324	-0.68139	-9.63
	-0.68339	-4.343	-0.68339	-9.488
	-0.68539	-4.361	-0.68539	-9.35
	-0.68739	-4.381	-0.68739	-9.207
	-0.68939	-4.398	-0.68939	-9.069
	-0.69139	-4.417	-0.69139	-8.929
	-0.69339	-4.435	-0.69339	-8.781
	-0.69539	-4.451	-0.69539	-8.647
	-0.69739	-4.469	-0.69739	-8.512
	-0.69939	-4.487	-0.69939	-8.375
	-0.70139	-4.504	-0.70139	-8.243
	-0.70339	-4.521	-0.70339	-8.112
	-0.70539	-4.538	-0.70539	-7.984
	-0.70739	-4.557	-0.70739	-7.861
	-0.70939	-4.572	-0.70939	-7.735
	-0.71139	-4.592	-0.71139	-7.617
	-0.71339	-4.606	-0.71339	-7.503
	-0.71539	-4.623	-0.71539	-7.389
	-0.71739	-4.641	-0.71739	-7.288
	-0.71939	-4.655	-0.71939	-7.179
	-0.72139	-4.672	-0.72139	-7.069
	-0.72339	-4.686	-0.72339	-6.973
	-0.72539	-4.706	-0.72539	-6.877
	-0.72739	-4.718	-0.72739	-6.796
	-0.72939	-4.738	-0.72939	-6.708
	-0.73139	-4.75	-0.73139	-6.623
	-0.73339	-4.767	-0.73339	-6.544
	-0.73539	-4.783	-0.73539	-6.468
	-0.73739	-4.8	-0.73739	-6.396
	-0.73539	-4.695	-0.73939	-6.33
	-0.73339	-4.603	-0.74139	-6.267
	-0.73139	-4.521	-0.74339	-6.207
	-0.72939	-4.446	-0.74539	-6.15
	-0.72739	-4.375	-0.74739	-6.093
	-0.72539	-4.311	-0.74939	-6.044
	-0.72339	-4.251	-0.75139	-5.994
	-0.72139	-4.192	-0.75339	-5.95
	-0.71939	-4.137	-0.75539	-5.908
	-0.71739	-4.086	-0.75739	-5.871
	-0.71539	-4.038	-0.75939	-5.835
	-0.71339	-3.991	-0.76139	-5.802
	-0.71139	-3.948	-0.76339	-5.77
	-0.70939	-3.902	-0.76539	-5.738
	-0.70739	-3.863	-0.76739	-5.713
	-0.70539	-3.823	-0.76939	-5.692
	-0.70339	-3.783	-0.77139	-5.672
	-0.70139	-3.746	-0.77339	-5.65
	-0.69939	-3.712	-0.77539	-5.636
	-0.69739	-3.677	-0.77739	-5.621
	-0.69539	-3.645	-0.77939	-5.605
	-0.69339	-3.611	-0.78139	-5.596
	-0.69139	-3.58	-0.78339	-5.592
	-0.68939	-3.549	-0.78539	-5.584
	-0.68739	-3.52	-0.78739	-5.579
	-0.68539	-3.489	-0.78939	-5.575
	-0.68339	-3.465	-0.79139	-5.572
	-0.68139	-3.436	-0.79339	-5.573
	-0.67939	-3.409	-0.79539	-5.572
	-0.67739	-3.385	-0.79739	-5.575
	-0.67539	-3.359	-0.79939	-5.579
	-0.67339	-3.334	-0.80139	-5.585
	-0.67139	-3.308	-0.80339	-5.59
	-0.66939	-3.285	-0.80539	-5.599
	-0.66739	-3.263	-0.80739	-5.612
	-0.66539	-3.242	-0.80939	-5.622
	-0.66339	-3.217	-0.81139	-5.635
	-0.66139	-3.199	-0.81339	-5.647
	-0.65939	-3.173	-0.81539	-5.661
	-0.65739	-3.157	-0.81739	-5.679
	-0.65539	-3.133	-0.81939	-5.698
	-0.65339	-3.114	-0.82139	-5.718
	-0.65139	-3.093	-0.82339	-5.736
	-0.64939	-3.074	-0.82539	-5.762
	-0.64739	-3.057	-0.82739	-5.787
	-0.64539	-3.037	-0.82939	-5.813
	-0.64339	-3.022	-0.83139	-5.833
	-0.64139	-3.002	-0.83339	-5.862
	-0.63939	-2.985	-0.83539	-5.891
	-0.63739	-2.968	-0.83739	-5.924
	-0.63539	-2.95	-0.83539	-5.652
	-0.63339	-2.934	-0.83339	-5.438
	-0.63139	-2.916	-0.83139	-5.256
	-0.62939	-2.9	-0.82939	-5.099
	-0.62739	-2.885	-0.82739	-4.958
	-0.62539	-2.87	-0.82539	-4.832
	-0.62339	-2.856	-0.82339	-4.72
	-0.62139	-2.839	-0.82139	-4.615
	-0.61939	-2.827	-0.81939	-4.518
	-0.61739	-2.81	-0.81739	-4.429
	-0.61539	-2.796	-0.81539	-4.346
	-0.61339	-2.779	-0.81339	-4.269
	-0.61139	-2.77	-0.81139	-4.197
	-0.60939	-2.751	-0.80939	-4.131
	-0.60739	-2.74	-0.80739	-4.066
	-0.60539	-2.725	-0.80539	-4.006
	-0.60339	-2.713	-0.80339	-3.949
	-0.60139	-2.699	-0.80139	-3.895
	-0.59939	-2.685	-0.79939	-3.843
	-0.59739	-2.673	-0.79739	-3.795
	-0.59539	-2.66	-0.79539	-3.748
	-0.59339	-2.648	-0.79339	-3.702
	-0.59139	-2.636	-0.79139	-3.659
	-0.58939	-2.624	-0.78939	-3.619
	-0.58739	-2.611	-0.78739	-3.579
	-0.58539	-2.6	-0.78539	-3.54
	-0.58339	-2.587	-0.78339	-3.503
	-0.58139	-2.576	-0.78139	-3.468
	-0.57939	-2.564	-0.77939	-3.434
	-0.57739	-2.553	-0.77739	-3.405
	-0.57539	-2.542	-0.77539	-3.369
	-0.57339	-2.531	-0.77339	-3.34
	-0.57139	-2.519	-0.77139	-3.311
	-0.56939	-2.508	-0.76939	-3.282
	-0.56739	-2.497	-0.76739	-3.254
	-0.56539	-2.487	-0.76539	-3.226
	-0.56339	-2.477	-0.76339	-3.199
	-0.56139	-2.467	-0.76139	-3.173
	-0.55939	-2.457	-0.75939	-3.148
	-0.55739	-2.447	-0.75739	-3.125
	-0.55539	-2.437	-0.75539	-3.1
	-0.55339	-2.427	-0.75339	-3.076
	-0.55139	-2.418	-0.75139	-3.054
	-0.54939	-2.408	-0.74939	-3.033
	-0.54739	-2.398	-0.74739	-3.013
	-0.54539	-2.39	-0.74539	-2.991
	-0.54339	-2.379	-0.74339	-2.97
	-0.54139	-2.371	-0.74139	-2.95
	-0.53939	-2.361	-0.73939	-2.931
	-0.53739	-2.354	-0.73739	-2.914
	-0.53539	-2.344	-0.73539	-2.894
	-0.53339	-2.336	-0.73339	-2.876
	-0.53139	-2.327	-0.73139	-2.859
	-0.52939	-2.319	-0.72939	-2.84
	-0.52739	-2.31	-0.72739	-2.823
	-0.52539	-2.301	-0.72539	-2.807
	-0.52339	-2.294	-0.72339	-2.79
	-0.52139	-2.285	-0.72139	-2.776
	-0.51939	-2.279	-0.71939	-2.757
	-0.51739	-2.27	-0.71739	-2.742
	-0.51539	-2.262	-0.71539	-2.728
	-0.51339	-2.254	-0.71339	-2.713
	-0.51139	-2.248	-0.71139	-2.697
	-0.50939	-2.239	-0.70939	-2.684
	-0.50739	-2.233	-0.70739	-2.67
	-0.50539	-2.225	-0.70539	-2.656
	-0.50339	-2.218	-0.70339	-2.642
	-0.50139	-2.213	-0.70139	-2.628
	-0.49939	-2.202	-0.69939	-2.616
	-0.49739	-2.198	-0.69739	-2.602
	-0.49539	-2.19	-0.69539	-2.59
	-0.49339	-2.184	-0.69339	-2.576
	-0.49139	-2.176	-0.69139	-2.565
	-0.48939	-2.171	-0.68939	-2.551
	-0.48739	-2.162	-0.68739	-2.539
	-0.48539	-2.156	-0.68539	-2.528
	-0.48339	-2.151	-0.68339	-2.517
	-0.48139	-2.144	-0.68139	-2.505
	-0.47939	-2.138	-0.67939	-2.491
	-0.47739	-2.13	-0.67739	-2.482
	-0.47539	-2.125	-0.67539	-2.471
	-0.47339	-2.118	-0.67339	-2.459
	-0.47139	-2.113	-0.67139	-2.448
	-0.46939	-2.105	-0.66939	-2.439
	-0.46739	-2.101	-0.66739	-2.428
	-0.46539	-2.095	-0.66539	-2.418
	-0.46339	-2.09	-0.66339	-2.407
	-0.46139	-2.084	-0.66139	-2.396
	-0.45939	-2.078	-0.65939	-2.387
	-0.45739	-2.073	-0.65739	-2.376
	-0.45539	-2.067	-0.65539	-2.367
	-0.45339	-2.062	-0.65339	-2.359
	-0.45139	-2.056	-0.65139	-2.348
	-0.44939	-2.051	-0.64939	-2.339
	-0.44739	-2.045	-0.64739	-2.328
	-0.44539	-2.041	-0.64539	-2.319
	-0.44339	-2.035	-0.64339	-2.31
	-0.44139	-2.03	-0.64139	-2.301
	-0.43939	-2.025	-0.63939	-2.291
	-0.43739	-2.021	-0.63739	-2.284
	-0.43539	-2.015	-0.63539	-2.276
	-0.43339	-2.01	-0.63339	-2.267
	-0.43139	-2.004	-0.63139	-2.258
	-0.42939	-2.001	-0.62939	-2.25
	-0.42739	-1.995	-0.62739	-2.241
	-0.42539	-1.99	-0.62539	-2.233
	-0.42339	-1.985	-0.62339	-2.224
	-0.42139	-1.981	-0.62139	-2.216
	-0.41939	-1.978	-0.61939	-2.208
	-0.41739	-1.972	-0.61739	-2.199
	-0.41539	-1.968	-0.61539	-2.191
	-0.41339	-1.962	-0.61339	-2.184
	-0.41139	-1.959	-0.61139	-2.176
	-0.40939	-1.955	-0.60939	-2.168
	-0.40739	-1.95	-0.60739	-2.161
	-0.40539	-1.945	-0.60539	-2.153
	-0.40339	-1.941	-0.60339	-2.145
	-0.40139	-1.938	-0.60139	-2.138
	-0.39939	-1.933	-0.59939	-2.13
	-0.39739	-1.93	-0.59739	-2.122
	-0.39539	-1.924	-0.59539	-2.116
	-0.39339	-1.921	-0.59339	-2.107
	-0.39139	-1.916	-0.59139	-2.101
	-0.38939	-1.913	-0.58939	-2.093
	-0.38739	-1.908	-0.58739	-2.088
	-0.38539	-1.905	-0.58539	-2.082
	-0.38339	-1.901	-0.58339	-2.073
	-0.38139	-1.896	-0.58139	-2.067
	-0.37939	-1.893	-0.57939	-2.061
	-0.37739	-1.888	-0.57739	-2.055
	-0.37539	-1.885	-0.57539	-2.047
	-0.37339	-1.882	-0.57339	-2.041
	-0.37139	-1.879	-0.57139	-2.035
	-0.36939	-1.875	-0.56939	-2.028
	-0.36739	-1.872	-0.56739	-2.022
	-0.36539	-1.867	-0.56539	-2.015
	-0.36339	-1.864	-0.56339	-2.008
	-0.36139	-1.859	-0.56139	-2.002
	-0.35939	-1.856	-0.55939	-1.996
	-0.35739	-1.853	-0.55739	-1.99
	-0.35539	-1.848	-0.55539	-1.984
	-0.35339	-1.845	-0.55339	-1.979
	-0.35139	-1.841	-0.55139	-1.973
	-0.34939	-1.838	-0.54939	-1.965
	-0.34739	-1.833	-0.54739	-1.961
	-0.34539	-1.83	-0.54539	-1.955
	-0.34339	-1.827	-0.54339	-1.95
	-0.34139	-1.822	-0.54139	-1.942
	-0.33939	-1.819	-0.53939	-1.938
	-0.33739	-1.816	-0.53739	-1.933
	-0.33539	-1.81	-0.53539	-1.927
	-0.33339	-1.809	-0.53339	-1.922
	-0.33139	-1.804	-0.53139	-1.916
	-0.32939	-1.801	-0.52939	-1.91
	-0.32739	-1.796	-0.52739	-1.905
	-0.32539	-1.795	-0.52539	-1.901
	-0.32339	-1.789	-0.52339	-1.895
	-0.32139	-1.787	-0.52139	-1.89
	-0.31939	-1.782	-0.51939	-1.885
	-0.31739	-1.781	-0.51739	-1.881
	-0.31539	-1.775	-0.51539	-1.876
	-0.31339	-1.772	-0.51339	-1.872
	-0.31139	-1.767	-0.51139	-1.865
	-0.30939	-1.765	-0.50939	-1.861
	-0.30739	-1.761	-0.50739	-1.858
	-0.30539	-1.758	-0.50539	-1.852
	-0.30339	-1.755	-0.50339	-1.847
	-0.30139	-1.75	-0.50139	-1.842
	-0.29939	-1.747	-0.49939	-1.839
	-0.29739	-1.742	-0.49739	-1.833
	-0.29539	-1.739	-0.49539	-1.829
	-0.29339	-1.736	-0.49339	-1.825
	-0.29139	-1.733	-0.49139	-1.819
	-0.28939	-1.73	-0.48939	-1.815
	-0.28739	-1.725	-0.48739	-1.812
	-0.28539	-1.722	-0.48539	-1.807
	-0.28339	-1.719	-0.48339	-1.802
	-0.28139	-1.715	-0.48139	-1.799
	-0.27939	-1.712	-0.47939	-1.795
	-0.27739	-1.709	-0.47739	-1.79
	-0.27539	-1.707	-0.47539	-1.787
	-0.27339	-1.702	-0.47339	-1.782
	-0.27139	-1.698	-0.47139	-1.779
	-0.26939	-1.695	-0.46939	-1.775
	-0.26739	-1.692	-0.46739	-1.77
	-0.26539	-1.69	-0.46539	-1.767
	-0.26339	-1.685	-0.46339	-1.762
	-0.26139	-1.684	-0.46139	-1.758
	-0.25939	-1.681	-0.45939	-1.756
	-0.25739	-1.676	-0.45739	-1.752
	-0.25539	-1.673	-0.45539	-1.749
	-0.25339	-1.67	-0.45339	-1.744
	-0.25139	-1.667	-0.45139	-1.741
	-0.24939	-1.664	-0.44939	-1.736
	-0.24739	-1.659	-0.44739	-1.733
	-0.24539	-1.658	-0.44539	-1.73
	-0.24339	-1.653	-0.44339	-1.725
	-0.24139	-1.65	-0.44139	-1.721
	-0.23939	-1.647	-0.43939	-1.718
	-0.23739	-1.644	-0.43739	-1.716
	-0.23539	-1.641	-0.43539	-1.712
	-0.23339	-1.636	-0.43339	-1.707
	-0.23139	-1.633	-0.43139	-1.705
	-0.22939	-1.632	-0.42939	-1.702
	-0.22739	-1.627	-0.42739	-1.699
	-0.22539	-1.624	-0.42539	-1.695
	-0.22339	-1.621	-0.42339	-1.693
	-0.22139	-1.618	-0.42139	-1.69
	-0.21939	-1.613	-0.41939	-1.687
	-0.21739	-1.612	-0.41739	-1.684
	-0.21539	-1.607	-0.41539	-1.679
	-0.21339	-1.604	-0.41339	-1.678
	-0.21139	-1.601	-0.41139	-1.673
	-0.20939	-1.598	-0.40939	-1.672
	-0.20739	-1.595	-0.40739	-1.669
	-0.20539	-1.593	-0.40539	-1.665
	-0.20339	-1.59	-0.40339	-1.662
	-0.20139	-1.587	-0.40139	-1.659
	-0.19939	-1.584	-0.39939	-1.656
	-0.19739	-1.581	-0.39739	-1.653
	-0.19539	-1.576	-0.39539	-1.652
	-0.19339	-1.573	-0.39339	-1.649
	-0.19139	-1.57	-0.39139	-1.644
	-0.18939	-1.567	-0.38939	-1.641
	-0.18739	-1.564	-0.38739	-1.639
	-0.18539	-1.561	-0.38539	-1.636
	-0.18339	-1.556	-0.38339	-1.633
	-0.18139	-1.553	-0.38139	-1.632
	-0.17939	-1.55	-0.37939	-1.629
	-0.17739	-1.546	-0.37739	-1.626
	-0.17539	-1.542	-0.37539	-1.622
	-0.17339	-1.539	-0.37339	-1.621
	-0.17139	-1.536	-0.37139	-1.616
	-0.16939	-1.532	-0.36939	-1.615
	-0.16739	-1.527	-0.36739	-1.613
	-0.16539	-1.524	-0.36539	-1.61
	-0.16339	-1.521	-0.36339	-1.607
	-0.16139	-1.516	-0.36139	-1.604
	-0.15939	-1.513	-0.35939	-1.602
	-0.15739	-1.51	-0.35739	-1.601
	-0.15539	-1.506	-0.35539	-1.598
	-0.15339	-1.502	-0.35339	-1.596
	-0.15139	-1.498	-0.35139	-1.593
	-0.14939	-1.495	-0.34939	-1.592
	-0.14739	-1.492	-0.34739	-1.59
	-0.14539	-1.489	-0.34539	-1.589
	-0.14339	-1.484	-0.34339	-1.586
	-0.14139	-1.479	-0.34139	-1.584
	-0.13939	-1.476	-0.33939	-1.581
	-0.13739	-1.472	-0.33739	-1.579
	-0.13539	-1.467	-0.33539	-1.576
	-0.13339	-1.462	-0.33339	-1.575
	-0.13139	-1.459	-0.33139	-1.572
	-0.12939	-1.455	-0.32939	-1.57
	-0.12739	-1.45	-0.32739	-1.567
	-0.12539	-1.446	-0.32539	-1.566
	-0.12339	-1.443	-0.32339	-1.562
	-0.12139	-1.438	-0.32139	-1.561
	-0.11939	-1.433	-0.31939	-1.559
	-0.11739	-1.429	-0.31739	-1.556
	-0.11539	-1.424	-0.31539	-1.555
	-0.11339	-1.419	-0.31339	-1.552
	-0.11139	-1.415	-0.31139	-1.55
	-0.10939	-1.412	-0.30939	-1.547
	-0.10739	-1.407	-0.30739	-1.546
	-0.10539	-1.401	-0.30539	-1.542
	-0.10339	-1.398	-0.30339	-1.541
	-0.10139	-1.392	-0.30139	-1.539
	-0.09939	-1.389	-0.29939	-1.536
	-0.09739	-1.383	-0.29739	-1.535
	-0.09539	-1.378	-0.29539	-1.533
	-0.09339	-1.373	-0.29339	-1.53
	-0.09139	-1.369	-0.29139	-1.529
	-0.08939	-1.364	-0.28939	-1.526
	-0.08739	-1.359	-0.28739	-1.524
	-0.08539	-1.353	-0.28539	-1.522
	-0.08339	-1.349	-0.28339	-1.519
	-0.08139	-1.343	-0.28139	-1.516
	-0.07939	-1.338	-0.27939	-1.516
	-0.07739	-1.332	-0.27739	-1.513
	-0.07539	-1.327	-0.27539	-1.51
	-0.07339	-1.321	-0.27339	-1.509
	-0.07139	-1.316	-0.27139	-1.507
	-0.06939	-1.31	-0.26939	-1.504
	-0.06739	-1.304	-0.26739	-1.502
	-0.06539	-1.299	-0.26539	-1.499
	-0.06339	-1.295	-0.26339	-1.498
	-0.06139	-1.29	-0.26139	-1.495
	-0.05939	-1.284	-0.25939	-1.495
	-0.05739	-1.278	-0.25739	-1.492
	-0.05539	-1.272	-0.25539	-1.49
	-0.05339	-1.266	-0.25339	-1.489
	-0.05139	-1.26	-0.25139	-1.486
	-0.04939	-1.253	-0.24939	-1.484
	-0.04739	-1.247	-0.24739	-1.482
	-0.04539	-1.241	-0.24539	-1.478
	-0.04339	-1.235	-0.24339	-1.476
	-0.04139	-1.23	-0.24139	-1.475
	-0.03939	-1.223	-0.23939	-1.472
	-0.03739	-1.216	-0.23739	-1.472
	-0.03539	-1.21	-0.23539	-1.467
	-0.03339	-1.204	-0.23339	-1.466
	-0.03139	-1.198	-0.23139	-1.464
	-0.02939	-1.192	-0.22939	-1.461
	-0.02739	-1.184	-0.22739	-1.459
	-0.02539	-1.178	-0.22539	-1.456
	-0.02339	-1.172	-0.22339	-1.455
	-0.02139	-1.166	-0.22139	-1.452
	-0.01939	-1.158	-0.21939	-1.45
	-0.01739	-1.15	-0.21739	-1.447
	-0.01539	-1.144	-0.21539	-1.444
	-0.01339	-1.138	-0.21339	-1.443
	-0.01139	-1.13	-0.21139	-1.441
	-0.00939	-1.123	-0.20939	-1.438
	-0.00739	-1.116	-0.20739	-1.435
	-0.00539	-1.109	-0.20539	-1.433
	-0.00339	-1.101	-0.20339	-1.43
	-0.00139	-1.095	-0.20139	-1.429
	0.000608	-1.089	-0.19939	-1.426
	0.00261	-1.081	-0.19739	-1.423
	0.00461	-1.073	-0.19539	-1.421
	0.00661	-1.067	-0.19339	-1.418
	0.00861	-1.06	-0.19139	-1.415
	0.01061	-1.052	-0.18939	-1.413
	0.01261	-1.044	-0.18739	-1.412
	0.01461	-1.037	-0.18539	-1.409
	0.01661	-1.029	-0.18339	-1.404
	0.01861	-1.021	-0.18139	-1.403
	0.02061	-1.013	-0.17939	-1.401
	0.02261	-1.007	-0.17739	-1.398
	0.02461	-1	-0.17539	-1.395
	0.02661	-0.992	-0.17339	-1.392
	0.02861	-0.984	-0.17139	-1.39
	0.03061	-0.975	-0.16939	-1.389
	0.03261	-0.969	-0.16739	-1.384
	0.03461	-0.96	-0.16539	-1.383
	0.03661	-0.953	-0.16339	-1.379
	0.03861	-0.944	-0.16139	-1.378
	0.04061	-0.938	-0.15939	-1.373
	0.04261	-0.929	-0.15739	-1.372
	0.04461	-0.921	-0.15539	-1.369
	0.04661	-0.913	-0.15339	-1.366
	0.04861	-0.906	-0.15139	-1.363
	0.05061	-0.9	-0.14939	-1.359
	0.05261	-0.892	-0.14739	-1.358
	0.05461	-0.883	-0.14539	-1.353
	0.05661	-0.875	-0.14339	-1.35
	0.05861	-0.869	-0.14139	-1.349
	0.06061	-0.86	-0.13939	-1.344
	0.06261	-0.852	-0.13739	-1.341
	0.06461	-0.844	-0.13539	-1.339
	0.06661	-0.837	-0.13339	-1.336
	0.06861	-0.829	-0.13139	-1.335
	0.07061	-0.82	-0.12939	-1.33
	0.07261	-0.814	-0.12739	-1.327
	0.07461	-0.806	-0.12539	-1.324
	0.07661	-0.798	-0.12339	-1.321
	0.07861	-0.789	-0.12139	-1.319
	0.08061	-0.781	-0.11939	-1.315
	0.08261	-0.774	-0.11739	-1.313
	0.08461	-0.766	-0.11539	-1.31
	0.08661	-0.758	-0.11339	-1.306
	0.08861	-0.749	-0.11139	-1.303
	0.09061	-0.741	-0.10939	-1.301
	0.09261	-0.734	-0.10739	-1.298
	0.09461	-0.726	-0.10539	-1.295
	0.09661	-0.718	-0.10339	-1.292
	0.09861	-0.711	-0.10139	-1.289
	0.10061	-0.703	-0.09939	-1.286
	0.10261	-0.695	-0.09739	-1.283
	0.10461	-0.687	-0.09539	-1.278
	0.10661	-0.68	-0.09339	-1.276
	0.10861	-0.672	-0.09139	-1.272
	0.11061	-0.663	-0.08939	-1.269
	0.11261	-0.655	-0.08739	-1.266
	0.11461	-0.647	-0.08539	-1.263
	0.11661	-0.64	-0.08339	-1.258
	0.11861	-0.632	-0.08139	-1.255
	0.12061	-0.624	-0.07939	-1.252
	0.12261	-0.617	-0.07739	-1.249
	0.12461	-0.609	-0.07539	-1.244
	0.12661	-0.601	-0.07339	-1.243
	0.12861	-0.594	-0.07139	-1.236
	0.13061	-0.586	-0.06939	-1.233
	0.13261	-0.578	-0.06739	-1.23
	0.13461	-0.571	-0.06539	-1.226
	0.13661	-0.563	-0.06339	-1.223
	0.13861	-0.555	-0.06139	-1.22
	0.14061	-0.547	-0.05939	-1.216
	0.14261	-0.54	-0.05739	-1.212
	0.14461	-0.532	-0.05539	-1.209
	0.14661	-0.526	-0.05339	-1.206
	0.14861	-0.518	-0.05139	-1.203
	0.15061	-0.511	-0.04939	-1.196
	0.15261	-0.504	-0.04739	-1.193
	0.15461	-0.498	-0.04539	-1.19
	0.15661	-0.491	-0.04339	-1.187
	0.15861	-0.486	-0.04139	-1.183
	0.16061	-0.48	-0.03939	-1.18
	0.16261	-0.472	-0.03739	-1.175
	0.16461	-0.466	-0.03539	-1.17
	0.16661	-0.459	-0.03339	-1.167
	0.16861	-0.452	-0.03139	-1.163
	0.17061	-0.446	-0.02939	-1.161
	0.17261	-0.438	-0.02739	-1.155
	0.17461	-0.431	-0.02539	-1.15
	0.17661	-0.425	-0.02339	-1.147
	0.17861	-0.418	-0.02139	-1.143
	0.18061	-0.412	-0.01939	-1.14
	0.18261	-0.405	-0.01739	-1.135
	0.18461	-0.399	-0.01539	-1.132
	0.18661	-0.393	-0.01339	-1.126
	0.18861	-0.386	-0.01139	-1.123
	0.19061	-0.38	-0.00939	-1.12
	0.19261	-0.374	-0.00739	-1.115
	0.19461	-0.368	-0.00539	-1.11
	0.19661	-0.362	-0.00339	-1.106
	0.19861	-0.356	-0.00139	-1.103
	0.20061	-0.35	0.000608	-1.098
	0.20261	-0.344	0.00261	-1.095
	0.20461	-0.338	0.00461	-1.09
	0.20661	-0.332	0.00661	-1.086
	0.20861	-0.326	0.00861	-1.081
	0.21061	-0.321	0.01061	-1.078
	0.21261	-0.315	0.01261	-1.073
	0.21461	-0.31	0.01461	-1.069
	0.21661	-0.304	0.01661	-1.064
	0.21861	-0.299	0.01861	-1.06
	0.22061	-0.293	0.02061	-1.055
	0.22261	-0.288	0.02261	-1.05
	0.22461	-0.283	0.02461	-1.046
	0.22661	-0.277	0.02661	-1.043
	0.22861	-0.272	0.02861	-1.037
	0.23061	-0.267	0.03061	-1.033
	0.23261	-0.262	0.03261	-1.029
	0.23461	-0.257	0.03461	-1.023
	0.23661	-0.252	0.03661	-1.018
	0.23861	-0.247	0.03861	-1.015
	0.24061	-0.242	0.04061	-1.009
	0.24261	-0.238	0.04261	-1.004
	0.24461	-0.233	0.04461	-1.001
	0.24661	-0.228	0.04661	-0.995
	0.24861	-0.224	0.04861	-0.992
	0.25061	-0.219	0.05061	-0.986
	0.25261	-0.215	0.05261	-0.983
	0.25461	-0.21	0.05461	-0.977
	0.25661	-0.206	0.05661	-0.97
	0.25861	-0.201	0.05861	-0.967
	0.26061	-0.197	0.06061	-0.961
	0.26261	-0.192	0.06261	-0.957
	0.26461	-0.188	0.06461	-0.952
	0.26661	-0.184	0.06661	-0.947
	0.26861	-0.18	0.06861	-0.944
	0.27061	-0.175	0.07061	-0.938
	0.27261	-0.172	0.07261	-0.933
	0.27461	-0.168	0.07461	-0.929
	0.27661	-0.163	0.07661	-0.924
	0.27861	-0.16	0.07861	-0.92
	0.28061	-0.156	0.08061	-0.915
	0.28261	-0.152	0.08261	-0.909
	0.28461	-0.149	0.08461	-0.906
	0.28661	-0.145	0.08661	-0.901
	0.28861	-0.141	0.08861	-0.897
	0.29061	-0.137	0.09061	-0.892
	0.29261	-0.134	0.09261	-0.887
	0.29461	-0.13	0.09461	-0.883
	0.29661	-0.127	0.09661	-0.877
	0.29861	-0.123	0.09861	-0.874
	0.30061	-0.12	0.10061	-0.869
	0.30261	-0.116	0.10261	-0.863
	0.30461	-0.113	0.10461	-0.858
	0.30661	-0.11	0.10661	-0.854
	0.30861	-0.107	0.10861	-0.849
	0.31061	-0.103	0.11061	-0.844
	0.31261	-0.1	0.11261	-0.838
	0.31461	-0.097	0.11461	-0.834
	0.31661	-0.094	0.11661	-0.827
	0.31861	-0.09	0.11861	-0.823
	0.32061	-0.088	0.12061	-0.818
	0.32261	-0.084	0.12261	-0.815
	0.32461	-0.082	0.12461	-0.81
	0.32661	-0.078	0.12661	-0.804
	0.32861	-0.076	0.12861	-0.8
	0.33061	-0.073	0.13061	-0.795
	0.33261	-0.07	0.13261	-0.79
	0.33461	-0.067	0.13461	-0.784
	0.33661	-0.064	0.13661	-0.78
	0.33861	-0.061	0.13861	-0.775
	0.34061	-0.059	0.14061	-0.769
	0.34261	-0.056	0.14261	-0.766
	0.34461	-0.053	0.14461	-0.76
	0.34661	-0.051	0.14661	-0.754
	0.34861	-0.048	0.14861	-0.749
	0.35061	-0.045	0.15061	-0.744
	0.35261	-0.043	0.15261	-0.74
	0.35461	-0.041	0.15461	-0.735
	0.35661	-0.038	0.15661	-0.727
	0.35861	-0.036	0.15861	-0.723
	0.36061	-0.033	0.16061	-0.718
	0.36261	-0.031	0.16261	-0.712
	0.36461	-0.028	0.16461	-0.707
	0.36661	-0.026	0.16661	-0.703
	0.36861	-0.023	0.16861	-0.698
	0.37061	-0.021	0.17061	-0.692
	0.37261	-0.018	0.17261	-0.686
	0.37461	-0.016	0.17461	-0.683
	0.37661	-0.014	0.17661	-0.675
	0.37861	-0.012	0.17861	-0.671
	0.38061	-0.009	0.18061	-0.666
	0.38261	-0.007	0.18261	-0.658
	0.38461	-0.005	0.18461	-0.654
	0.38661	-0.003	0.18661	-0.647
	0.38861	-0.001	0.18861	-0.641
	0.39061	0.001	0.19061	-0.637
	0.39261	0.002	0.19261	-0.629
	0.39461	0.005	0.19461	-0.624
	0.39661	0.007	0.19661	-0.618
	0.39861	0.009	0.19861	-0.614
	0.40061	0.011	0.20061	-0.607
	0.40261	0.013	0.20261	-0.603
	0.40461	0.015	0.20461	-0.595
	0.40661	0.017	0.20661	-0.591
	0.40861	0.018	0.20861	-0.584
	0.41061	0.021	0.21061	-0.578
	0.41261	0.022	0.21261	-0.572
	0.41461	0.024	0.21461	-0.566
	0.41661	0.026	0.21661	-0.561
	0.41861	0.028	0.21861	-0.554
	0.42061	0.029	0.22061	-0.549
	0.42261	0.031	0.22261	-0.541
	0.42461	0.033	0.22461	-0.535
	0.42661	0.034	0.22661	-0.531
	0.42861	0.036	0.22861	-0.523
	0.43061	0.037	0.23061	-0.517
	0.43261	0.039	0.23261	-0.512
	0.43461	0.041	0.23461	-0.504
	0.43661	0.042	0.23661	-0.501
	0.43861	0.044	0.23861	-0.494
	0.44061	0.045	0.24061	-0.492
	0.44261	0.046	0.24261	-0.486
	0.44461	0.048	0.24461	-0.48
	0.44661	0.05	0.24661	-0.475
	0.44861	0.051	0.24861	-0.468
	0.45061	0.052	0.25061	-0.461
	0.45261	0.054	0.25261	-0.455
	0.45461	0.055	0.25461	-0.449
	0.45661	0.056	0.25661	-0.443
	0.45861	0.058	0.25861	-0.435
	0.46061	0.059	0.26061	-0.429
	0.46261	0.061	0.26261	-0.424
	0.46461	0.062	0.26461	-0.417
	0.46661	0.063	0.26661	-0.409
	0.46861	0.064	0.26861	-0.404
	0.47061	0.066	0.27061	-0.397
	0.47261	0.067	0.27261	-0.391
	0.47461	0.068	0.27461	-0.385
	0.47661	0.069	0.27661	-0.377
	0.47861	0.07	0.27861	-0.371
	0.48061	0.071	0.28061	-0.366
	0.48261	0.072	0.28261	-0.36
	0.48461	0.073	0.28461	-0.352
	0.48661	0.074	0.28661	-0.347
	0.48861	0.076	0.28861	-0.341
	0.49061	0.076	0.29061	-0.334
	0.49261	0.078	0.29261	-0.328
	0.49461	0.079	0.29461	-0.32
	0.49661	0.08	0.29661	-0.314
	0.49861	0.081	0.29861	-0.308
	0.50061	0.081	0.30061	-0.301
	0.50261	0.083	0.30261	-0.295
	0.50461	0.083	0.30461	-0.288
	0.50661	0.084	0.30661	-0.282
	0.50861	0.085	0.30861	-0.275
	0.51061	0.086	0.31061	-0.269
	0.51261	0.087	0.31261	-0.262
	0.51461	0.088	0.31461	-0.256
	0.51661	0.088	0.31661	-0.249
	0.51861	0.09	0.31861	-0.244
	0.52061	0.09	0.32061	-0.236
	0.52261	0.091	0.32261	-0.231
	0.52461	0.092	0.32461	-0.224
	0.52661	0.093	0.32661	-0.217
	0.52861	0.094	0.32861	-0.211
	0.53061	0.094	0.33061	-0.203
	0.53261	0.095	0.33261	-0.198
	0.53461	0.096	0.33461	-0.192
	0.53661	0.097	0.33661	-0.184
	0.53861	0.097	0.33861	-0.179
	0.54061	0.098	0.34061	-0.17
	0.54261	0.098	0.34261	-0.166
	0.54461	0.1	0.34461	-0.158
	0.54661	0.1	0.34661	-0.153
	0.54861	0.101	0.34861	-0.147
	0.55061	0.101	0.35061	-0.141
	0.55261	0.102	0.35261	-0.135
	0.55461	0.102	0.35461	-0.127
	0.55661	0.103	0.35661	-0.122
	0.55861	0.104	0.35861	-0.116
	0.56061	0.104	0.36061	-0.109
	0.56261	0.105	0.36261	-0.104
	0.56461	0.105	0.36461	-0.097
	0.56661	0.106	0.36661	-0.092
	0.56861	0.107	0.36861	-0.085
	0.57061	0.108	0.37061	-0.078
	0.57261	0.108	0.37261	-0.073
	0.57461	0.109	0.37461	-0.067
	0.57661	0.109	0.37661	-0.061
	0.57861	0.109	0.37861	-0.053
	0.58061	0.11	0.38061	-0.049
	0.58261	0.111	0.38261	-0.043
	0.58461	0.111	0.38461	-0.035
	0.58661	0.112	0.38661	-0.029
	0.58861	0.112	0.38861	-0.024
	0.59061	0.113	0.39061	-0.019
	0.59261	0.113	0.39261	-0.012
	0.59461	0.114	0.39461	-0.007
	0.59661	0.114	0.39661	0
	0.59861	0.115	0.39861	0.005
	0.60061	0.115	0.40061	0.011
	0.60261	0.116	0.40261	0.017
	0.60461	0.116	0.40461	0.022
	0.60661	0.116	0.40661	0.028
	0.60861	0.117	0.40861	0.033
	0.61061	0.118	0.41061	0.039
	0.61261	0.118	0.41261	0.045
	0.61461	0.119	0.41461	0.051
	0.61661	0.119	0.41661	0.056
	0.61861	0.12	0.41861	0.061
	0.62061	0.119	0.42061	0.066
	0.62261	0.12	0.42261	0.073
	0.62461	0.121	0.42461	0.077
	0.62661	0.121	0.42661	0.083
	0.62861	0.121	0.42861	0.089
	0.63061	0.122	0.43061	0.094
	0.63261	0.122	0.43261	0.099
	0.63461	0.123	0.43461	0.104
	0.63661	0.123	0.43661	0.111
	0.63861	0.124	0.43861	0.115
	0.64061	0.124	0.44061	0.12
	0.64261	0.125	0.44261	0.126
	0.64461	0.125	0.44461	0.13
	0.64661	0.125	0.44661	0.136
	0.64861	0.126	0.44861	0.142
	0.65061	0.126	0.45061	0.146
	0.65261	0.126	0.45261	0.152
	0.65461	0.127	0.45461	0.155
	0.65661	0.127	0.45661	0.16
	0.65861	0.127	0.45861	0.166
	0.66061	0.128	0.46061	0.171
	0.66261	0.128	0.46261	0.175
	0.66461	0.129	0.46461	0.18
	0.66661	0.129	0.46661	0.184
	0.66861	0.129	0.46861	0.188
	0.67061	0.13	0.47061	0.193
	0.67261	0.13	0.47261	0.198
	0.67461	0.13	0.47461	0.204
	0.67661	0.131	0.47661	0.208
	0.67861	0.131	0.47861	0.211
	0.68061	0.132	0.48061	0.22
	0.68261	0.132	0.48261	0.222
	0.68461	0.132	0.48461	0.225
	0.68661	0.133	0.48661	0.229
	0.68861	0.133	0.48861	0.233
	0.69061	0.133	0.49061	0.237
	0.69261	0.134	0.49261	0.242
	0.69461	0.134	0.49461	0.245
	0.69661	0.135	0.49661	0.247
	0.69861	0.135	0.49861	0.25
	0.70061	0.136	0.50061	0.254
	0.70261	0.136	0.50261	0.257
	0.70461	0.136	0.50461	0.261
	0.70661	0.136	0.50661	0.264
	0.70861	0.138	0.50861	0.267
	0.71061	0.138	0.51061	0.271
	0.71261	0.138	0.51261	0.275
	0.71461	0.138	0.51461	0.278
	0.71661	0.139	0.51661	0.282
	0.71861	0.139	0.51861	0.285
	0.72061	0.14	0.52061	0.287
	0.72261	0.141	0.52261	0.29
	0.72461	0.141	0.52461	0.292
	0.72661	0.141	0.52661	0.296
	0.72861	0.142	0.52861	0.3
	0.73061	0.142	0.53061	0.3
	0.73261	0.142	0.53261	0.304
	0.73461	0.143	0.53461	0.306
	0.73661	0.143	0.53661	0.309
	0.73861	0.144	0.53861	0.311
	0.74061	0.145	0.54061	0.313
	0.74261	0.145	0.54261	0.316
	0.74461	0.146	0.54461	0.317
	0.74661	0.146	0.54661	0.32
	0.74861	0.147	0.54861	0.321
	0.75061	0.147	0.55061	0.322
	0.75261	0.148	0.55261	0.325
	0.75461	0.148	0.55461	0.326
	0.75661	0.149	0.55661	0.329
	0.75861	0.148	0.55861	0.333
	0.76061	0.15	0.56061	0.335
	0.76261	0.149	0.56261	0.335
	0.76461	0.15	0.56461	0.338
	0.76661	0.151	0.56661	0.34
	0.76861	0.151	0.56861	0.34
	0.77061	0.152	0.57061	0.344
	0.77261	0.152	0.57261	0.344
	0.77461	0.152	0.57461	0.345
	0.77661	0.153	0.57661	0.347
	0.77861	0.153	0.57861	0.348
	0.78061	0.153	0.58061	0.35
	0.78261	0.153	0.58261	0.352
	0.78461	0.153	0.58461	0.354
	0.78661	0.154	0.58661	0.356
	0.78861	0.153	0.58861	0.356
	0.79061	0.154	0.59061	0.357
	0.79261	0.155	0.59261	0.359
	0.79461	0.155	0.59461	0.36
	0.79661	0.155	0.59661	0.359
	0.79861	0.155	0.59861	0.363
	0.80061	0.156	0.60061	0.363
	0.80261	0.156	0.60261	0.365
	0.80461	0.155	0.60461	0.366
	0.80661	0.156	0.60661	0.367
	0.80861	0.156	0.60861	0.367
	0.81061	0.156	0.61061	0.369
	0.81261	0.157	0.61261	0.37
	0.81461	0.156	0.61461	0.369
	0.81661	0.156	0.61661	0.373
	0.81861	0.157	0.61861	0.373
	0.82061	0.157	0.62061	0.374
	0.82261	0.157	0.62261	0.375
	0.82461	0.157	0.62461	0.377
	0.82661	0.157	0.62661	0.378
	0.82861	0.158	0.62861	0.379
	0.83061	0.157	0.63061	0.379
	0.83261	0.157	0.63261	0.381
	0.83461	0.158	0.63461	0.381
	0.83661	0.158	0.63661	0.383
	0.83861	0.158	0.63861	0.383
	0.84061	0.158	0.64061	0.385
	0.84261	0.158	0.64261	0.385
	0.84461	0.159	0.64461	0.388
	0.84661	0.159	0.64661	0.386
	0.84861	0.159	0.64861	0.389
	0.85061	0.159	0.65061	0.389
	0.85261	0.159	0.65261	0.391
	0.85461	0.159	0.65461	0.391
	0.85661	0.159	0.65661	0.394
	0.85861	0.159	0.65861	0.394
	0.86061	0.159	0.66061	0.395
	0.86261	0.16	0.66261	0.396
	0.86461	0.16	0.66461	0.396
	0.86661	0.162	0.66661	0.398
	0.86861	0.161	0.66861	0.398
	0.87061	0.161	0.67061	0.398
	0.87261	0.161	0.67261	0.4
	0.87461	0.161	0.67461	0.424
	0.87661	0.161	0.67661	0.402
	0.87861	0.161	0.67861	0.403
	0.88061	0.161	0.68061	0.405
	0.88261	0.161	0.68261	0.406
	0.88461	0.162	0.68461	0.407
	0.88661	0.162	0.68661	0.408
	0.88861	0.162	0.68861	0.41
	0.89061	0.162	0.69061	0.409
	0.89261	0.163	0.69261	0.412
	0.89461	0.163	0.69461	0.413
	0.89661	0.163	0.69661	0.414
	0.89861	0.164	0.69861	0.415
	0.90061	0.164	0.70061	0.418
	0.90261	0.164	0.70261	0.416
	0.90461	0.165	0.70461	0.421
	0.90661	0.165	0.70661	0.421
	0.90861	0.165	0.70861	0.421
	0.91061	0.166	0.71061	0.422
	0.91261	0.166	0.71261	0.424
	0.91461	0.167	0.71461	0.426
	0.91661	0.167	0.71661	0.427
	0.91861	0.167	0.71861	0.429
	0.92061	0.168	0.72061	0.431
	0.92261	0.169	0.72261	0.433
	0.92461	0.169	0.72461	0.436
	0.92661	0.17	0.72661	0.437
	0.92861	0.171	0.72861	0.439
	0.93061	0.171	0.73061	0.443
	0.93261	0.172	0.73261	0.441
	0.93461	0.172	0.73461	0.444
	0.93661	0.173	0.73661	0.446
	0.93861	0.173	0.73861	0.448
	0.94061	0.174	0.74061	0.45
	0.94261	0.174	0.74261	0.447
	0.94461	0.175	0.74461	0.45
	0.94661	0.175	0.74661	0.454
	0.94861	0.175	0.74861	0.458
	0.95061	0.176	0.75061	0.459
	0.95261	0.177	0.75261	0.459
	0.95461	0.177	0.75461	0.464
	0.95661	0.178	0.75661	0.464
	0.95861	0.178	0.75861	0.464
	0.96061	0.178	0.76061	0.467
	0.96261	0.179	0.76261	0.465
	0.96461	0.179	0.76461	0.469
	0.96661	0.179	0.76661	0.47
	0.96861	0.18	0.76861	0.472
	0.97061	0.18	0.77061	0.473
	0.97261	0.18	0.77261	0.473
	0.97461	0.18	0.77461	0.472
	0.97661	0.18	0.77661	0.476
	0.97861	0.181	0.77861	0.477
	0.98061	0.181	0.78061	0.479
	0.98261	0.181	0.78261	0.479
	0.98461	0.181	0.78461	0.482
	0.98661	0.181	0.78661	0.48
	0.98861	0.181	0.78861	0.483
	0.99061	0.181	0.79061	0.486
	0.99261	0.181	0.79261	0.485
	0.99461	0.181	0.79461	0.486
	0.99661	0.181	0.79661	0.487
	0.99861	0.181	0.79861	0.487
	1.00061	0.182	0.80061	0.487
	1.00261	0.182	0.80261	0.488
	1.00461	0.181	0.80461	0.489
	1.00661	0.182	0.80661	0.491
	1.00861	0.181	0.80861	0.49
	1.01061	0.182	0.81061	0.49
	1.01261	0.182	0.81261	0.494
	1.01461	0.182	0.81461	0.493
	1.01661	0.182	0.81661	0.494
	1.01861	0.182	0.81861	0.496
	1.02061	0.182	0.82061	0.496
	1.02261	0.182	0.82261	0.496
	1.02461	0.182	0.82461	0.498
	1.02661	0.182	0.82661	0.498
	1.02861	0.182	0.82861	0.499
	1.03061	0.182	0.83061	0.499
	1.03261	0.182	0.83261	0.501
	1.03461	0.182	0.83461	0.499
	1.03661	0.182	0.83661	0.502
	1.03861	0.182	0.83861	0.503
	1.04061	0.182	0.84061	0.506
	1.04261	0.182	0.84261	0.507
	1.04461	0.183	0.84461	0.504
	1.04661	0.183	0.84661	0.506
	1.04861	0.183	0.84861	0.508
	1.05061	0.183	0.85061	0.509
	1.05261	0.183	0.85261	0.511
	1.05461	0.183	0.85461	0.51
	1.05661	0.183	0.85661	0.512
	1.05861	0.184	0.85861	0.514
	1.06061	0.184	0.86061	0.514
	1.06261	0.184	0.86261	0.516
	1.06461	0.184	0.86461	0.519
	1.06661	0.184	0.86661	0.532
	1.06861	0.185	0.86861	0.527
	1.07061	0.185	0.87061	0.529
	1.07261	0.185	0.87261	0.531
	1.07461	0.185	0.87461	0.538
	1.07661	0.186	0.87661	0.534
	1.07861	0.186	0.87861	0.535
	1.08061	0.187	0.88061	0.537
	1.08261	0.186	0.88261	0.54
	1.08461	0.187	0.88461	0.541
	1.08661	0.187	0.88661	0.543
	1.08861	0.187	0.88861	0.547
	1.09061	0.188	0.89061	0.551
	1.09261	0.188	0.89261	0.552
	1.09461	0.188	0.89461	0.555
	1.09661	0.189	0.89661	0.56
	1.09861	0.189	0.89861	0.561
	1.10061	0.19	0.90061	0.566
	1.10261	0.19	0.90261	0.569
	1.10461	0.191	0.90461	0.574
	1.10661	0.191	0.90661	0.577
	1.10861	0.192	0.90861	0.58
	1.11061	0.192	0.91061	0.583
	1.11261	0.193	0.91261	0.587
	1.11461	0.193	0.91461	0.592
	1.11661	0.194	0.91661	0.597
	1.11861	0.194	0.91861	0.6
	1.12061	0.195	0.92061	0.604
	1.12261	0.195	0.92261	0.609
	1.12461	0.196	0.92461	0.612
	1.12661	0.197	0.92661	0.617
	1.12861	0.197	0.92861	0.621
	1.13061	0.198	0.93061	0.626
	1.13261	0.198	0.93261	0.63
	1.13461	0.199	0.93461	0.634
	1.13661	0.2	0.93661	0.635
	1.13861	0.201	0.93861	0.641
	1.14061	0.201	0.94061	0.646
	1.14261	0.202	0.94261	0.65
	1.14461	0.202	0.94461	0.654
	1.14661	0.203	0.94661	0.658
	1.14861	0.204	0.94861	0.661
	1.15061	0.204	0.95061	0.664
	1.15261	0.204	0.95261	0.667
	1.15461	0.205	0.95461	0.669
	1.15661	0.206	0.95661	0.672
	1.15861	0.206	0.95861	0.675
	1.16061	0.206	0.96061	0.678
	1.16261	0.207	0.96261	0.678
	1.16461	0.207	0.96461	0.681
	1.16661	0.207	0.96661	0.684
	1.16861	0.208	0.96861	0.686
	1.17061	0.208	0.97061	0.686
	1.17261	0.209	0.97261	0.689
	1.17461	0.209	0.97461	0.69
	1.17661	0.21	0.97661	0.692
	1.17861	0.21	0.97861	0.694
	1.18061	0.21	0.98061	0.695
	1.18261	0.211	0.98261	0.697
	1.18461	0.211	0.98461	0.695
	1.18661	0.212	0.98661	0.697
	1.18861	0.212	0.98861	0.703
	1.19061	0.213	0.99061	0.701
	1.19261	0.214	0.99261	0.704
	1.19461	0.214	0.99461	0.706
	1.19661	0.215	0.99661	0.707
	1.19861	0.216	0.99861	0.707
	1.20061	0.216	1.00061	0.71
	1.20261	0.217	1.00261	0.709
	1.20461	0.218	1.00461	0.714
	1.20661	0.219	1.00661	0.714
	1.20861	0.22	1.00861	0.717
	1.21061	0.22	1.01061	0.717
	1.21261	0.221	1.01261	0.718
	1.21461	0.222	1.01461	0.718
	1.21661	0.223	1.01661	0.721
	1.21861	0.224	1.01861	0.723
	1.22061	0.225	1.02061	0.723
	1.22261	0.225	1.02261	0.726
	1.22461	0.227	1.02461	0.727
	1.22661	0.228	1.02661	0.726
	1.22861	0.229	1.02861	0.732
	1.23061	0.23	1.03061	0.734
	1.23261	0.231	1.03261	0.735
	1.23461	0.232	1.03461	0.735
	1.23661	0.233	1.03661	0.744
	1.23861	0.235	1.03861	0.741
	1.24061	0.236	1.04061	0.754
	1.24261	0.237	1.04261	0.749
	1.24461	0.238	1.04461	0.752
	1.24661	0.24	1.04661	0.754
	1.24861	0.241	1.04861	0.755
	1.25061	0.243	1.05061	0.76
	1.25261	0.244	1.05261	0.761
	1.25461	0.245	1.05461	0.764
	1.25661	0.247	1.05661	0.767
	1.25861	0.248	1.05861	0.772
	1.26061	0.25	1.06061	0.775
	1.26261	0.251	1.06261	0.777
	1.26461	0.253	1.06461	0.781
	1.26661	0.254	1.06661	0.784
	1.26861	0.256	1.06861	0.787
	1.27061	0.257	1.07061	0.789
	1.27261	0.259	1.07261	0.797
	1.27461	0.26	1.07461	0.801
	1.27661	0.263	1.07661	0.804
	1.27861	0.264	1.07861	0.809
	1.28061	0.266	1.08061	0.813
	1.28261	0.268	1.08261	0.818
	1.28461	0.27	1.08461	0.82
	1.28661	0.271	1.08661	0.826
	1.28861	0.274	1.08861	0.83
	1.29061	0.275	1.09061	0.84
	1.29261	0.277	1.09261	0.841
	1.29461	0.279	1.09461	0.844
	1.29661	0.281	1.09661	0.85
	1.29861	0.284	1.09861	0.857
	1.30061	0.285	1.10061	0.861
	1.30261	0.287	1.10261	0.867
	1.30461	0.29	1.10461	0.87
	1.30661	0.292	1.10661	0.877
	1.30861	0.294	1.10861	0.884
	1.31061	0.296	1.11061	0.89
	1.31261	0.298	1.11261	0.897
	1.31461	0.301	1.11461	0.904
	1.31661	0.303	1.11661	0.91
	1.31861	0.305	1.11861	0.917
	1.32061	0.307	1.12061	0.924
	1.32261	0.309	1.12261	0.933
	1.32461	0.311	1.12461	0.94
	1.32661	0.314	1.12661	0.949
	1.32861	0.316	1.12861	0.957
	1.33061	0.318	1.13061	0.966
	1.33261	0.32	1.13261	0.973
	1.33461	0.322	1.13461	0.983
	1.33661	0.324	1.13661	0.989
	1.33861	0.326	1.13861	1.001
	1.34061	0.328	1.14061	1.012
	1.34261	0.33	1.14261	1.023
	1.34461	0.332	1.14461	1.033
	1.34661	0.334	1.14661	1.044
	1.34861	0.336	1.14861	1.056
	1.35061	0.337	1.15061	1.067
	1.35261	0.339	1.15261	1.08
	1.35461	0.341	1.15461	1.092
	1.35661	0.343	1.15661	1.106
	1.35861	0.344	1.15861	1.12
	1.36061	0.346	1.16061	1.135
	1.36261	0.347	1.16261	1.149
	1.36461	0.349	1.16461	1.163
	1.36661	0.35	1.16661	1.181
	1.36861	0.352	1.16861	1.199
	1.37061	0.353	1.17061	1.215
	1.37261	0.355	1.17261	1.233
	1.37461	0.356	1.17461	1.252
	1.37661	0.357	1.17661	1.272
	1.37861	0.359	1.17861	1.292
	1.38061	0.361	1.18061	1.315
	1.38261	0.361	1.18261	1.336
	1.38461	0.363	1.18461	1.361
	1.38661	0.364	1.18661	1.387
	1.38861	0.366	1.18861	1.412
	1.39061	0.367	1.19061	1.439
	1.39261	0.368	1.19261	1.466
	1.39461	0.37	1.19461	1.495
	1.39661	0.37	1.19661	1.527
	1.39861	0.372	1.19861	1.558
	1.40061	0.373	1.20061	1.589
	1.40261	0.375	1.20261	1.622
	1.40461	0.376	1.20461	1.659
	1.40661	0.377	1.20661	1.695
	1.40861	0.379	1.20861	1.735
	1.41061	0.38	1.21061	1.776
	1.41261	0.381	1.21261	1.819
	1.41461	0.383	1.21461	1.861
	1.41661	0.385	1.21661	1.907
	1.41861	0.386	1.21861	1.953
	1.42061	0.388	1.22061	2.002
	1.42261	0.389	1.22261	2.05
	1.42461	0.391	1.22461	2.102
	1.42661	0.393	1.22661	2.154
	1.42861	0.395	1.22861	2.211
	1.43061	0.396	1.23061	2.267
	1.43261	0.398	1.23261	2.325
	1.43461	0.4	1.23461	2.384
	1.43661	0.402	1.23661	2.444
	1.43861	0.404	1.23861	2.507
	1.44061	0.406	1.24061	2.571
	1.44261	0.408	1.24261	2.636
	1.44461	0.411	1.24461	2.702
	1.44661	0.413	1.24661	2.77
	1.44861	0.415	1.24861	2.837
	1.45061	0.418	1.25061	2.905
	1.45261	0.42	1.25261	2.974
	1.45461	0.422	1.25461	3.039
	1.45661	0.425	1.25661	3.105
	1.45861	0.428	1.25861	3.157
	1.46061	0.43	1.26061	3.219
	1.46261	0.433	1.26261	3.3
	1.46461	0.436	1.26461	3.337
	1.46661	0.439	1.26661	3.377
	1.46861	0.442	1.26861	3.412
	1.47061	0.445	1.27061	3.429
	1.47261	0.448	1.27261	3.44
	1.47461	0.451	1.27461	3.437
	1.47661	0.455	1.27661	3.416
	1.47861	0.457	1.27861	3.374
	1.48061	0.461	1.28061	3.309
	1.48261	0.465	1.28261	3.222
	1.48461	0.468	1.28461	3.114
	1.48661	0.472	1.28661	2.986
	1.48861	0.475	1.28861	2.843
	1.49061	0.479	1.29061	2.694
	1.49261	0.483	1.29261	2.544
	1.49461	0.487	1.29461	2.394
	1.49661	0.491	1.29661	2.27
	1.49861	0.495	1.29861	2.168
	1.50061	0.499	1.30061	2.073
	1.50261	0.503	1.30261	1.991
	1.50461	0.507	1.30461	1.933
	1.50661	0.512	1.30661	1.893
	1.50861	0.516	1.30861	1.858
	1.51061	0.521	1.31061	1.83
	1.51261	0.525	1.31261	1.812
	1.51461	0.53	1.31461	1.798
	1.51661	0.535	1.31661	1.788
	1.51861	0.54	1.31861	1.785
	1.52061	0.544	1.32061	1.784
	1.52261	0.549	1.32261	1.788
	1.52461	0.555	1.32461	1.795
	1.52661	0.559	1.32661	1.796
	1.52861	0.565	1.32861	1.807
	1.53061	0.57	1.33061	1.819
	1.53261	0.575	1.33261	1.838
	1.53461	0.58	1.33461	1.853
	1.53661	0.586	1.33661	1.87
	1.53861	0.591	1.33861	1.885
	1.54061	0.597	1.34061	1.905
	1.54261	0.602	1.34261	1.927
	1.54461	0.608	1.34461	1.947
	1.54661	0.614	1.34661	1.971
	1.54861	0.619	1.34861	1.995
	1.55061	0.625	1.35061	2.021
	1.55261	0.631	1.35261	2.073
	1.55461	0.636	1.35461	2.076
	1.55661	0.642	1.35661	2.102
	1.55861	0.648	1.35861	2.131
	1.56061	0.654	1.36061	2.164
	1.56261	0.66	1.36261	2.193
	1.56461	0.667	1.36461	2.225
	1.56661	0.672	1.36661	2.258
	1.56861	0.679	1.36861	2.285
	1.57061	0.686	1.37061	2.331
	1.57261	0.692	1.37261	2.367
	1.57461	0.698	1.37461	2.402
	1.57661	0.705	1.37661	2.434
	1.57861	0.712	1.37861	2.474
	1.58061	0.718	1.38061	2.514
	1.58261	0.725	1.38261	2.56
	1.58461	0.732	1.38461	2.607
	1.58661	0.739	1.38661	2.662
	1.58861	0.745	1.38861	2.707
	1.59061	0.752	1.39061	2.759
	1.59261	0.759	1.39261	2.802
	1.59461	0.766	1.39461	2.856
	1.59661	0.773	1.39661	2.913
	1.59861	0.78	1.39861	2.979
	1.60061	0.787	1.40061	3.042
	1.60261	0.794	1.40261	3.106
	1.60461	0.801	1.40461	3.173
	1.60661	0.807	1.40661	3.239
	1.60861	0.815	1.40861	3.317
	1.61061	0.822	1.41061	3.392
	1.61261	0.829	1.41261	3.471
	1.61461	0.836	1.41461	3.551
	1.61661	0.843	1.41661	3.637
	1.61861	0.851	1.41861	3.728
	1.62061	0.858	1.42061	3.818
	1.62261	0.865	1.42261	3.92
	1.62461	0.873	1.42461	4.023
	1.62661	0.88	1.42661	4.129
	1.62861	0.887	1.42861	4.241
	1.63061	0.894	1.43061	4.354
	1.63261	0.902	1.43261	4.475
	1.63461	0.91	1.43461	4.598
	1.63661	0.917	1.43661	4.729
	1.63861	0.925	1.43861	4.86
	1.64061	0.932	1.44061	5.001
	1.64261	0.94	1.44261	5.139
	1.64461	0.947	1.44461	5.289
	1.64661	0.955	1.44661	5.439
	1.64861	0.963	1.44861	5.607
	1.65061	0.97	1.45061	5.767
	1.65261	0.978	1.45261	5.913
	1.65461	0.986	1.45461	6.111
[truncated: 1,203 more rows]

## Sheet: Extended Data Fig. 1. e
	Time-correlated single photon counting (TCSPC)
BTP_H2O_0% | Acetonitrile							BTP_H2O_5% | Acetonitrile							BTP_H2O_10% | Acetonitrile							fitted decay and exponential components BTP_H2O_0% | Acetonitrile						normalized		10000		fitted decay and exponential components BTP_H2O_5% | Acetonitrile						normalized		0		fitted decay and exponential components BTP_H2O_10% | Acetonitrile						normalized
Decay		Model Decay		Residuals			Decay		Model D	ecay	Residual	s		Decay		Model Deca	y	Residuals			Time[ns] Amp(t0) Amp(t1) sum						Decay				Time[ns] Amp(t0) Amp(t1) sum						Decay				Time[ns] Amp(t0) sum						Decay
t[ns]	Intens.	t[ns]	Intens.	t[ns]	diff.		t[ns]	Intens.	t[ns]	Intens.	t[ns]	diff.		t[ns]	Intens.	t[ns]	Intens.	t[ns]	diff.		0.0000 2950.712 6146.625 9097.3						t[ns]	normalized PL counts			0.0000 763.526 10115.678 10879.2						t[ns]	normalized PL counts			0.0000 11445.563 11445.6						t[ns]	normalized PL counts
0	7	0	0	0	0		0	6	0	0	0	0		0	2	0	0	0	0		0.0233 2928.856 5965.899 8894.8						0	0.0007			0.0144 760.327 9899.354 10659.7						0	0			0.0036 11331.678 11331.7						0	0
0.008	11	0.008	0	0.008	0		0.008	12	0.008	0	0.008	0		0.004	6	0.004	0	0.004	0		0.0467 2907.161 5790.487 8697.6						0.008	0.0011			0.0288 757.143 9687.656 10444.8						0.008	0			0.0072 11218.926 11218.9						0.004	0
0.016	12	0.016	0	0.016	0		0.016	16	0.016	0	0.016	0		0.008	5	0.008	0	0.008	0		0.0700 2885.628 5620.233 8505.9						0.016	0.0012			0.0432 753.971 9480.485 10234.5						0.016	0			0.0109 11107.296 11107.3						0.008	0
0.024	8	0.024	0	0.024	0		0.024	11	0.024	0	0.024	0		0.012	7	0.012	0	0.012	0		0.0934 2864.254 5454.984 8319.2						0.024	0.0008			0.0576 750.813 9277.744 10028.6						0.024	0			0.0145 10996.777 10996.8						0.012	0
0.032	14	0.032	0	0.032	0		0.032	9	0.032	0	0.032	0		0.016	2	0.016	0	0.016	0		0.1167 2843.038 5294.594 8137.6						0.032	0.0014			0.0719 747.669 9079.339 9827.0						0.032	0			0.0181 10887.357 10887.4						0.016	0
0.04	6	0.04	0	0.04	0		0.04	11	0.04	0	0.04	0		0.02	0	0.02	0	0.02	0		0.1401 2821.979 5138.920 7960.9						0.04	0.0006			0.0863 744.537 8885.177 9629.7						0.04	0			0.0217 10779.026 10779.0						0.02	0
0.048	8	0.048	0	0.048	0		0.048	17	0.048	0	0.048	0		0.024	2	0.024	0	0.024	0		0.1634 2801.077 4987.823 7788.9						0.048	0.0008			0.1007 741.418 8695.167 9436.6						0.048	0			0.0253 10671.773 10671.8						0.024	0
0.056	15	0.056	0	0.056	0		0.056	12	0.056	0	0.056	0		0.028	3	0.028	0	0.028	0		0.1868 2780.329 4841.168 7621.5						0.056	0.0015			0.1151 738.313 8509.221 9247.5						0.056	0			0.0290 10565.587 10565.6						0.028	0
0.064	1	0.064	0	0.064	0		0.064	15	0.064	0	0.064	0		0.032	6	0.032	0	0.032	0		0.2101 2759.735 4698.826 7458.6						0.064	0.0001			0.1295 735.220 8327.251 9062.5						0.064	0			0.0326 10460.457 10460.5						0.032	0
0.072	10	0.072	0	0.072	0		0.072	20	0.072	0	0.072	0		0.036	4	0.036	0	0.036	0		0.2334 2739.293 4560.669 7300.0						0.072	0.001			0.1439 732.141 8149.172 8881.3						0.072	0			0.0362 10356.374 10356.4						0.036	0
0.08	8	0.08	0	0.08	0		0.08	16	0.08	0	0.08	0		0.04	2	0.04	0	0.04	0		0.2568 2719.003 4426.574 7145.6						0.08	0.0008			0.1583 729.074 7974.902 8704.0						0.08	0			0.0398 10253.326 10253.3						0.04	0
0.088	9	0.088	0	0.088	0		0.088	19	0.088	0	0.088	0		0.044	4	0.044	0	0.044	0		0.2801 2698.863 4296.422 6995.3						0.088	0.0009			0.1727 726.021 7804.358 8530.4						0.088	0			0.0434 10151.304 10151.3						0.044	0
0.096	15	0.096	0	0.096	0		0.096	15	0.096	0	0.096	0		0.048	4	0.048	0	0.048	0		0.3035 2678.873 4170.096 6849.0						0.096	0.0015			0.1871 722.980 7637.462 8360.4						0.096	0			0.0471 10050.297 10050.3						0.048	0
0.104	13	0.104	0	0.104	0		0.104	12	0.104	0	0.104	0		0.052	3	0.052	0	0.052	0		0.3268 2659.030 4047.485 6706.5						0.104	0.0013			0.2015 719.951 7474.134 8194.1						0.104	0			0.0507 9950.295 9950.3						0.052	0
0.112	8	0.112	0	0.112	0		0.112	13	0.112	0	0.112	0		0.056	5	0.056	0	0.056	0		0.3502 2639.335 3928.479 6567.8						0.112	0.0008			0.2158 716.936 7314.300 8031.2						0.112	0			0.0543 9851.288 9851.3						0.056	0
0.12	16	0.12	0	0.12	0		0.12	11	0.12	0	0.12	0		0.06	2	0.06	0	0.06	0		0.3735 2619.785 3812.972 6432.8						0.12	0.0016			0.2302 713.933 7157.883 7871.8						0.12	0			0.0579 9753.266 9753.3						0.06	0
0.128	11	0.128	0	0.128	0		0.128	16	0.128	0	0.128	0		0.064	3	0.064	0	0.064	0		0.3969 2600.380 3700.861 6301.2						0.128	0.0011			0.2446 710.942 7004.811 7715.8						0.128	0			0.0615 9656.219 9656.2						0.064	0
0.136	12	0.136	0	0.136	0		0.136	14	0.136	0	0.136	0		0.068	3	0.068	0	0.068	0		0.4202 2581.119 3592.047 6173.2						0.136	0.0012			0.2590 707.965 6855.013 7563.0						0.136	0			0.0652 9560.138 9560.1						0.068	0
0.144	15	0.144	0	0.144	0		0.144	15	0.144	0	0.144	0		0.072	5	0.072	0	0.072	0		0.4435 2562.000 3486.432 6048.4						0.144	0.0015			0.2734 704.999 6708.419 7413.4						0.144	0			0.0688 9465.013 9465.0						0.072	0
0.152	10	0.152	0	0.152	0		0.152	13	0.152	0	0.152	0		0.076	5	0.076	0	0.076	0		0.4669 2543.023 3383.922 5926.9						0.152	0.001			0.2878 702.046 6564.959 7267.0						0.152	0			0.0724 9370.835 9370.8						0.076	0
0.16	14	0.16	0	0.16	0		0.16	12	0.16	0	0.16	0		0.08	3	0.08	0	0.08	0		0.4902 2524.187 3284.426 5808.6						0.16	0.0014			0.3022 699.106 6424.567 7123.7						0.16	0			0.0760 9277.593 9277.6						0.08	0
0.168	13	0.168	0	0.168	0		0.168	12	0.168	0	0.168	0		0.084	6	0.084	0	0.084	0		0.5136 2505.490 3187.856 5693.3						0.168	0.0013			0.3166 696.178 6287.177 6983.4						0.168	0			0.0796 9185.280 9185.3						0.084	0
0.176	14	0.176	0	0.176	0		0.176	12	0.176	0	0.176	0		0.088	4	0.088	0	0.088	0		0.5369 2486.932 3094.125 5581.1						0.176	0.0014			0.3310 693.262 6152.726 6846.0						0.176	0			0.0833 9093.885 9093.9						0.088	0
0.184	13	0.184	0	0.184	0		0.184	11	0.184	0	0.184	0		0.092	2	0.092	0	0.092	0		0.5603 2468.511 3003.150 5471.7						0.184	0.0013			0.3453 690.358 6021.149 6711.5						0.184	0			0.0869 9003.399 9003.4						0.092	0
0.192	11	0.192	0	0.192	0		0.192	14	0.192	0	0.192	0		0.096	3	0.096	0	0.096	0		0.5836 2450.227 2914.850 5365.1						0.192	0.0011			0.3597 687.466 5892.387 6579.9						0.192	0			0.0905 8913.814 8913.8						0.096	0
0.2	11	0.2	0	0.2	0		0.2	10	0.2	0	0.2	0		0.1	4	0.1	0	0.1	0		0.6070 2432.078 2829.147 5261.2						0.2	0.0011			0.3741 684.587 5766.378 6451.0						0.2	0			0.0941 8825.120 8825.1						0.1	0
0.208	8	0.208	0	0.208	0		0.208	16	0.208	0	0.208	0		0.104	3	0.104	0	0.104	0		0.6303 2414.063 2745.963 5160.0						0.208	0.0008			0.3885 681.719 5643.064 6324.8						0.208	0			0.0977 8737.308 8737.3						0.104	0
0.216	12	0.216	0	0.216	0		0.216	14	0.216	0	0.216	0		0.108	5	0.108	0	0.108	0		0.6536 2396.182 2665.225 5061.4						0.216	0.0012			0.4029 678.864 5522.387 6201.3						0.216	0			0.1014 8650.371 8650.4						0.108	0
0.224	11	0.224	0	0.224	0		0.224	9	0.224	0	0.224	0		0.112	4	0.112	0	0.112	0		0.6770 2378.433 2586.860 4965.3						0.224	0.0011			0.4173 676.020 5404.290 6080.3						0.224	0			0.1050 8564.298 8564.3						0.112	0
0.232	9	0.232	0	0.232	0		0.232	14	0.232	0	0.232	0		0.116	5	0.116	0	0.116	0		0.7003 2360.816 2510.800 4871.6						0.232	0.0009			0.4317 673.189 5288.719 5961.9						0.232	0			0.1086 8479.082 8479.1						0.116	0
0.24	10	0.24	0	0.24	0		0.24	16	0.24	0	0.24	0		0.12	3	0.12	0	0.12	0		0.7237 2343.329 2436.977 4780.3						0.24	0.001			0.4461 670.369 5175.620 5846.0						0.24	0			0.1122 8394.714 8394.7						0.12	0
0.248	6	0.248	0	0.248	0		0.248	14	0.248	0	0.248	0		0.124	3	0.124	0	0.124	0		0.7470 2325.972 2365.323 4691.3						0.248	0.0006			0.4605 667.561 5064.939 5732.5						0.248	0			0.1158 8311.185 8311.2						0.124	0
0.256	8	0.256	0	0.256	0		0.256	12	0.256	0	0.256	0		0.128	4	0.128	0	0.128	0		0.7704 2308.743 2295.777 4604.5						0.256	0.0008			0.4748 664.765 4956.625 5621.4						0.256	0			0.1195 8228.487 8228.5						0.128	0
0.264	13	0.264	0	0.264	0		0.264	10	0.264	0	0.264	0		0.132	5	0.132	0	0.132	0		0.7937 2291.642 2228.276 4519.9						0.264	0.0013			0.4892 661.981 4850.627 5512.6						0.264	0			0.1231 8146.612 8146.6						0.132	0
0.272	11	0.272	0	0.272	0		0.272	18	0.272	0	0.272	0		0.136	4	0.136	0	0.136	0		0.8171 2274.668 2162.759 4437.4						0.272	0.0011			0.5036 659.208 4746.897 5406.1						0.272	0			0.1267 8065.552 8065.6						0.136	0
0.28	13	0.28	0	0.28	0		0.28	17	0.28	0	0.28	0		0.14	4	0.14	0	0.14	0		0.8404 2257.819 2099.168 4357.0						0.28	0.0013			0.5180 656.447 4645.384 5301.8						0.28	0			0.1303 7985.299 7985.3						0.14	0
0.288	10	0.288	0	0.288	0		0.288	19	0.288	0	0.288	0		0.144	4	0.144	0	0.144	0		0.8637 2241.096 2037.448 4278.5						0.288	0.001			0.5324 653.697 4546.042 5199.7						0.288	0			0.1339 7905.844 7905.8						0.144	0
0.296	13	0.296	0	0.296	0		0.296	15	0.296	0	0.296	0		0.148	4	0.148	0	0.148	0		0.8871 2224.496 1977.542 4202.0						0.296	0.0013			0.5468 650.959 4448.825 5099.8						0.296	0			0.1376 7827.179 7827.2						0.148	0
0.304	14	0.304	0	0.304	0		0.304	8	0.304	0	0.304	0		0.152	6	0.152	0	0.152	0		0.9104 2208.019 1919.397 4127.4						0.304	0.0014			0.5612 648.233 4353.687 5001.9						0.304	0			0.1412 7749.297 7749.3						0.152	0
0.312	11	0.312	0	0.312	0		0.312	9	0.312	0	0.312	0		0.156	1	0.156	0	0.156	0		0.9338 2191.664 1862.962 4054.6						0.312	0.0011			0.5756 645.518 4260.583 4906.1						0.312	0			0.1448 7672.191 7672.2						0.156	0
0.32	12	0.32	0	0.32	0		0.32	12	0.32	0	0.32	0		0.16	2	0.16	0	0.16	0		0.9571 2175.430 1808.186 3983.6						0.32	0.0012			0.5900 642.814 4169.470 4812.3						0.32	0			0.1484 7595.851 7595.9						0.16	0
0.328	14	0.328	0	0.328	0		0.328	17	0.328	0	0.328	0		0.164	0	0.164	0	0.164	0		0.9805 2159.316 1755.021 3914.3						0.328	0.0014			0.6044 640.121 4080.306 4720.4						0.328	0			0.1520 7520.271 7520.3						0.164	0
0.336	4	0.336	0	0.336	0		0.336	10	0.336	0	0.336	0		0.168	3	0.168	0	0.168	0		1.0038 2143.322 1703.419 3846.7						0.336	0.0004			0.6187 637.440 3993.048 4630.5						0.336	0			0.1557 7445.443 7445.4						0.168	0
0.344	13	0.344	0	0.344	0		0.344	4	0.344	0	0.344	0		0.172	3	0.172	0	0.172	0		1.0272 2127.446 1653.334 3780.8						0.344	0.0013			0.6331 634.770 3907.657 4542.4						0.344	0			0.1593 7371.360 7371.4						0.172	0
0.352	8	0.352	0	0.352	0		0.352	13	0.352	0	0.352	0		0.176	5	0.176	0	0.176	0		1.0505 2111.688 1604.722 3716.4						0.352	0.0008			0.6475 632.111 3824.092 4456.2						0.352	0			0.1629 7298.013 7298.0						0.176	0
0.36	8	0.36	0	0.36	0		0.36	20	0.36	0	0.36	0		0.18	4	0.18	0	0.18	0		1.0738 2096.047 1557.539 3653.6						0.36	0.0008			0.6619 629.464 3742.313 4371.8						0.36	0			0.1665 7225.397 7225.4						0.18	0
0.368	10	0.368	0	0.368	0		0.368	5	0.368	0	0.368	0		0.184	3	0.184	0	0.184	0		1.0972 2080.521 1511.744 3592.3						0.368	0.001			0.6763 626.827 3662.284 4289.1						0.368	0			0.1701 7153.503 7153.5						0.184	0
0.376	2	0.376	0	0.376	0		0.376	14	0.376	0	0.376	0		0.188	6	0.188	0	0.188	0		1.1205 2065.111 1467.295 3532.4						0.376	0.0002			0.6907 624.202 3583.966 4208.2						0.376	0			0.1738 7082.325 7082.3						0.188	0
0.384	8	0.384	0	0.384	0		0.384	16	0.384	0	0.384	0		0.192	5	0.192	0	0.192	0		1.1439 2049.814 1424.153 3474.0						0.384	0.0008			0.7051 621.587 3507.322 4128.9						0.384	0			0.1774 7011.854 7011.9						0.192	0
0.392	6	0.392	0	0.392	0		0.392	15	0.392	0	0.392	0		0.196	6	0.196	0	0.196	0		1.1672 2034.631 1382.279 3416.9						0.392	0.0006			0.7195 618.984 3432.318 4051.3						0.392	0			0.1810 6942.085 6942.1						0.196	0
0.4	9	0.4	0	0.4	0		0.4	10	0.4	0	0.4	0		0.2	0	0.2	0	0.2	0		1.1906 2019.561 1341.637 3361.2						0.4	0.0009			0.7339 616.391 3358.918 3975.3						0.4	0			0.1846 6873.010 6873.0						0.2	0
0.408	8	0.408	0	0.408	0		0.408	15	0.408	0	0.408	0		0.204	6	0.204	0	0.204	0		1.2139 2004.602 1302.189 3306.8						0.408	0.0008			0.7482 613.809 3287.087 3900.9						0.408	0			0.1882 6804.623 6804.6						0.204	0
0.416	16	0.416	0	0.416	0		0.416	9	0.416	0	0.416	0		0.208	5	0.208	0	0.208	0		1.2373 1989.753 1263.902 3253.7						0.416	0.0016			0.7626 611.238 3216.793 3828.0						0.416	0			0.1919 6736.916 6736.9						0.208	0
0.424	10	0.424	0	0.424	0		0.424	11	0.424	0	0.424	0		0.212	5	0.212	0	0.212	0		1.2606 1975.015 1226.740 3201.8						0.424	0.001			0.7770 608.678 3148.002 3756.7						0.424	0			0.1955 6669.882 6669.9						0.212	0
0.432	17	0.432	0	0.432	0		0.432	18	0.432	0	0.432	0		0.216	6	0.216	0	0.216	0		1.2839 1960.386 1190.671 3151.1						0.432	0.0017			0.7914 606.128 3080.681 3686.8						0.432	0			0.1991 6603.516 6603.5						0.216	0
0.44	12	0.44	0	0.44	0		0.44	10	0.44	0	0.44	0		0.22	3	0.22	0	0.22	0		1.3073 1945.865 1155.662 3101.5						0.44	0.0012			0.8058 603.590 3014.801 3618.4						0.44	0			0.2027 6537.810 6537.8						0.22	0
0.448	13	0.448	0	0.448	0		0.448	14	0.448	0	0.448	0		0.224	4	0.224	0	0.224	0		1.3306 1931.452 1121.683 3053.1						0.448	0.0013			0.8202 601.062 2950.329 3551.4						0.448	0			0.2063 6472.757 6472.8						0.224	0
0.456	5	0.456	0	0.456	0		0.456	7	0.456	0	0.456	0		0.228	5	0.228	0	0.228	0		1.3540 1917.146 1088.703 3005.8						0.456	0.0005			0.8346 598.544 2887.236 3485.8						0.456	0			0.2100 6408.352 6408.4						0.228	0
0.464	7	0.464	0	0.464	0		0.464	9	0.464	0	0.464	0		0.232	7	0.232	0	0.232	0		1.3773 1902.945 1056.692 2959.6						0.464	0.0007			0.8490 596.037 2825.493 3421.5						0.464	0			0.2136 6344.588 6344.6						0.232	0
0.472	12	0.472	0	0.472	0		0.472	14	0.472	0	0.472	0		0.236	1	0.236	0	0.236	0		1.4007 1888.850 1025.623 2914.5						0.472	0.0012			0.8634 593.540 2765.069 3358.6						0.472	0			0.2172 6281.458 6281.5						0.236	0
0.48	10	0.48	0	0.48	0		0.48	16	0.48	0	0.48	0		0.24	3	0.24	0	0.24	0		1.4240 1874.859 995.467 2870.3						0.48	0.001			0.8777 591.054 2705.938 3297.0						0.48	0			0.2208 6218.957 6219.0						0.24	0
0.488	6	0.488	0	0.488	0		0.488	19	0.488	0	0.488	0		0.244	7	0.244	0	0.244	0		1.4474 1860.972 966.198 2827.2						0.488	0.0006			0.8921 588.579 2648.072 3236.7						0.488	0			0.2244 6157.077 6157.1						0.244	0
0.496	6	0.496	0	0.496	0		0.496	12	0.496	0	0.496	0		0.248	1	0.248	0	0.248	0		1.4707 1847.188 937.789 2785.0						0.496	0.0006			0.9065 586.113 2591.443 3177.6						0.496	0			0.2280 6095.813 6095.8						0.248	0
0.504	9	0.504	0	0.504	0		0.504	18	0.504	0	0.504	0		0.252	3	0.252	0	0.252	0		1.4940 1833.505 910.216 2743.7						0.504	0.0009			0.9209 583.658 2536.025 3119.7						0.504	0			0.2317 6035.159 6035.2						0.252	0
0.512	13	0.512	0	0.512	0		0.512	12	0.512	0	0.512	0		0.256	3	0.256	0	0.256	0		1.5174 1819.925 883.453 2703.4						0.512	0.0013			0.9353 581.214 2481.792 3063.0						0.512	0			0.2353 5975.108 5975.1						0.256	0
0.52	7	0.52	0	0.52	0		0.52	17	0.52	0	0.52	0		0.26	6	0.26	0	0.26	0		1.5407 1806.444 857.477 2663.9						0.52	0.0007			0.9497 578.779 2428.718 3007.5						0.52	0			0.2389 5915.655 5915.7						0.26	0
0.528	10	0.528	0	0.528	0		0.528	12	0.528	0	0.528	0		0.264	4	0.264	0	0.264	0		1.5641 1793.064 832.265 2625.3						0.528	0.001			0.9641 576.355 2376.780 2953.1						0.528	0			0.2425 5856.793 5856.8						0.264	0
0.536	9	0.536	0	0.536	0		0.536	12	0.536	0	0.536	0		0.268	7	0.268	0	0.268	0		1.5874 1779.782 807.795 2587.6						0.536	0.0009			0.9785 573.941 2325.953 2899.9						0.536	0			0.2461 5798.517 5798.5						0.268	0
0.544	9	0.544	0	0.544	0		0.544	11	0.544	0	0.544	0		0.272	2	0.272	0	0.272	0		1.6108 1766.600 784.044 2550.6						0.544	0.0009			0.9929 571.537 2276.212 2847.7						0.544	0			0.2498 5740.821 5740.8						0.272	0
0.552	11	0.552	0	0.552	0		0.552	13	0.552	0	0.552	0		0.276	1	0.276	0	0.276	0		1.6341 1753.514 760.991 2514.5						0.552	0.0011			1.0073 569.143 2227.535 2796.7						0.552	0			0.2534 5683.699 5683.7						0.276	0
0.56	9	0.56	0	0.56	0		0.56	11	0.56	0	0.56	0		0.28	4	0.28	0	0.28	0		1.6575 1740.526 738.616 2479.1						0.56	0.0009			1.0216 566.759 2179.899 2746.7						0.56	0			0.2570 5627.145 5627.1						0.28	0
0.568	15	0.568	0	0.568	0		0.568	12	0.568	0	0.568	0		0.284	4	0.284	0	0.284	0		1.6808 1727.634 716.899 2444.5						0.568	0.0015			1.0360 564.385 2133.282 2697.7						0.568	0			0.2606 5571.154 5571.2						0.284	0
0.576	7	0.576	0	0.576	0		0.576	13	0.576	0	0.576	0		0.288	4	0.288	0	0.288	0		1.7041 1714.837 695.820 2410.7						0.576	0.0007			1.0504 562.021 2087.662 2649.7						0.576	0			0.2642 5515.720 5515.7						0.288	0
0.584	7	0.584	0	0.584	0		0.584	13	0.584	0	0.584	0		0.292	2	0.292	0	0.292	0		1.7275 1702.135 675.361 2377.5						0.584	0.0007			1.0648 559.667 2043.017 2602.7						0.584	0			0.2679 5460.838 5460.8						0.292	0
0.592	10	0.592	0	0.592	0		0.592	12	0.592	0	0.592	0		0.296	8	0.296	0	0.296	0		1.7508 1689.527 655.504 2345.0						0.592	0.001			1.0792 557.323 1999.327 2556.6						0.592	0			0.2715 5406.501 5406.5						0.296	0
0.6	8	0.6	0	0.6	0		0.6	13	0.6	0	0.6	0		0.3	2	0.3	0	0.3	0		1.7742 1677.013 636.230 2313.2						0.6	0.0008			1.0936 554.989 1956.571 2511.6						0.6	0			0.2751 5352.706 5352.7						0.3	0
0.608	6	0.608	0	0.608	0		0.608	12	0.608	0	0.608	0		0.304	3	0.304	0	0.304	0		1.7975 1664.591 617.524 2282.1						0.608	0.0006			1.1080 552.664 1914.730 2467.4						0.608	0			0.2787 5299.445 5299.4						0.304	0
0.616	6	0.616	0	0.616	0		0.616	11	0.616	0	0.616	0		0.308	4	0.308	0	0.308	0		1.8209 1652.261 599.367 2251.6						0.616	0.0006			1.1224 550.349 1873.783 2424.1						0.616	0			0.2823 5246.715 5246.7						0.308	0
0.624	11	0.624	0	0.624	0		0.624	16	0.624	0	0.624	0		0.312	3	0.312	0	0.312	0		1.8442 1640.023 581.744 2221.8						0.624	0.0011			1.1368 548.044 1833.712 2381.8						0.624	0			0.2860 5194.509 5194.5						0.312	0
0.632	10	0.632	0	0.632	0		0.632	13	0.632	0	0.632	0		0.316	6	0.316	0	0.316	0		1.8676 1627.875 564.639 2192.5						0.632	0.001			1.1511 545.748 1794.498 2340.2						0.632	0			0.2896 5142.823 5142.8						0.316	0
0.64	14	0.64	0	0.64	0		0.64	11	0.64	0	0.64	0		0.32	4	0.32	0	0.32	0		1.8909 1615.817 548.038 2163.9						0.64	0.0014			1.1655 543.463 1756.123 2299.6						0.64	0			0.2932 5091.651 5091.7						0.32	0
0.648	9	0.648	0	0.648	0		0.648	14	0.648	0	0.648	0		0.324	4	0.324	0	0.324	0		1.9142 1603.849 531.924 2135.8						0.648	0.0009			1.1799 541.186 1718.568 2259.8						0.648	0			0.2968 5040.988 5041.0						0.324	0
0.656	11	0.656	0	0.656	0		0.656	13	0.656	0	0.656	0		0.328	6	0.328	0	0.328	0		1.9376 1591.969 516.284 2108.3						0.656	0.0011			1.1943 538.919 1681.817 2220.7						0.656	0			0.3004 4990.830 4990.8						0.328	0
0.664	11	0.664	0	0.664	0		0.664	8	0.664	0	0.664	0		0.332	3	0.332	0	0.332	0		1.9609 1580.177 501.104 2081.3						0.664	0.0011			1.2087 536.662 1645.851 2182.5						0.664	0			0.3041 4941.170 4941.2						0.332	0
0.672	11	0.672	0	0.672	0		0.672	10	0.672	0	0.672	0		0.336	3	0.336	0	0.336	0		1.9843 1568.473 486.370 2054.8						0.672	0.0011			1.2231 534.414 1610.654 2145.1						0.672	0			0.3077 4892.005 4892.0						0.336	0
0.68	9	0.68	0	0.68	0		0.68	18	0.68	0	0.68	0		0.34	5	0.34	0	0.34	0		2.0076 1556.855 472.070 2028.9						0.68	0.0009			1.2375 532.176 1576.210 2108.4						0.68	0			0.3113 4843.328 4843.3						0.34	0
0.688	9	0.688	0	0.688	0		0.688	16	0.688	0	0.688	0		0.344	3	0.344	0	0.344	0		2.0310 1545.323 458.190 2003.5						0.688	0.0009			1.2519 529.947 1542.503 2072.4						0.688	0			0.3149 4795.137 4795.1						0.344	0
0.696	8	0.696	0	0.696	0		0.696	13	0.696	0	0.696	0		0.348	5	0.348	0	0.348	0		2.0543 1533.877 444.718 1978.6						0.696	0.0008			1.2663 527.727 1509.517 2037.2						0.696	0			0.3185 4747.424 4747.4						0.348	0
0.704	10	0.704	0	0.704	0		0.704	8	0.704	0	0.704	0		0.352	1	0.352	0	0.352	0		2.0777 1522.515 431.642 1954.2						0.704	0.001			1.2806 525.517 1477.235 2002.8						0.704	0			0.3222 4700.186 4700.2						0.352	0
0.712	11	0.712	0	0.712	0		0.712	7	0.712	0	0.712	0		0.356	6	0.356	0	0.356	0		2.1010 1511.238 418.951 1930.2						0.712	0.0011			1.2950 523.316 1445.645 1969.0						0.712	0			0.3258 4653.419 4653.4						0.356	0
0.72	12	0.72	0	0.72	0		0.72	15	0.72	0	0.72	0		0.36	6	0.36	0	0.36	0		2.1243 1500.044 406.633 1906.7						0.72	0.0012			1.3094 521.124 1414.730 1935.9						0.72	0			0.3294 4607.117 4607.1						0.36	0
0.728	15	0.728	0	0.728	0		0.728	10	0.728	0	0.728	0		0.364	3	0.364	0	0.364	0		2.1477 1488.933 394.677 1883.6						0.728	0.0015			1.3238 518.941 1384.475 1903.4						0.728	0			0.3330 4561.275 4561.3						0.364	0
0.736	13	0.736	0	0.736	0		0.736	16	0.736	0	0.736	0		0.368	1	0.368	0	0.368	0		2.1710 1477.905 383.072 1861.0						0.736	0.0013			1.3382 516.767 1354.868 1871.6						0.736	0			0.3366 4515.890 4515.9						0.368	0
0.744	14	0.744	0	0.744	0		0.744	9	0.744	0	0.744	0		0.372	7	0.372	0	0.372	0		2.1944 1466.958 371.809 1838.8						0.744	0.0014			1.3526 514.603 1325.895 1840.5						0.744	0			0.3403 4470.956 4471.0						0.372	0
0.752	12	0.752	0	0.752	0		0.752	11	0.752	0	0.752	0		0.376	5	0.376	0	0.376	0		2.2177 1456.092 360.877 1817.0						0.752	0.0012			1.3670 512.447 1297.540 1810.0						0.752	0			0.3439 4426.469 4426.5						0.376	0
0.76	9	0.76	0	0.76	0		0.76	12	0.76	0	0.76	0		0.38	2	0.38	0	0.38	0		2.2411 1445.306 350.266 1795.6						0.76	0.0009			1.3814 510.301 1269.792 1780.1						0.76	0			0.3475 4382.425 4382.4						0.38	0
0.768	14	0.768	0	0.768	0		0.768	9	0.768	0	0.768	0		0.384	3	0.384	0	0.384	0		2.2644 1434.601 339.967 1774.6						0.768	0.0014			1.3958 508.163 1242.638 1750.8						0.768	0			0.3511 4338.819 4338.8						0.384	0
0.776	13	0.776	0	0.776	0		0.776	15	0.776	0	0.776	0		0.388	3	0.388	0	0.388	0		2.2878 1423.975 329.972 1753.9						0.776	0.0013			1.4102 506.035 1216.064 1722.1						0.776	0			0.3547 4295.647 4295.6						0.388	0
0.784	6	0.784	0	0.784	0		0.784	9	0.784	0	0.784	0		0.392	4	0.392	0	0.392	0		2.3111 1413.427 320.270 1733.7						0.784	0.0006			1.4245 503.915 1190.058 1694.0						0.784	0			0.3584 4252.905 4252.9						0.392	0
0.792	9	0.792	0	0.792	0		0.792	11	0.792	0	0.792	0		0.396	2	0.396	0	0.396	0		2.3344 1402.958 310.853 1713.8						0.792	0.0009			1.4389 501.805 1164.609 1666.4						0.792	0			0.3620 4210.587 4210.6						0.396	0
0.8	7	0.8	0	0.8	0		0.8	16	0.8	0	0.8	0		0.4	4	0.4	0	0.4	0		2.3578 1392.566 301.713 1694.3						0.8	0.0007			1.4533 499.703 1139.704 1639.4						0.8	0			0.3656 4168.691 4168.7						0.4	0
0.808	14	0.808	0	0.808	0		0.808	16	0.808	0	0.808	0		0.404	3	0.404	0	0.404	0		2.3811 1382.251 292.842 1675.1						0.808	0.0014			1.4677 497.610 1115.331 1612.9						0.808	0			0.3692 4127.212 4127.2						0.404	0
0.816	6	0.816	0	0.816	0		0.816	9	0.816	0	0.816	0		0.408	5	0.408	0	0.408	0		2.4045 1372.013 284.232 1656.2						0.816	0.0006			1.4821 495.526 1091.480 1587.0						0.816	0			0.3728 4086.146 4086.1						0.408	0
0.824	10	0.824	0	0.824	0		0.824	9	0.824	0	0.824	0		0.412	1	0.412	0	0.412	0		2.4278 1361.850 275.874 1637.7						0.824	0.001			1.4965 493.450 1068.138 1561.6						0.824	0			0.3765 4045.488 4045.5						0.412	0
0.832	10	0.832	0	0.832	0		0.832	12	0.832	0	0.832	0		0.416	3	0.416	0	0.416	0		2.4512 1351.763 267.763 1619.5						0.832	0.001			1.5109 491.383 1045.296 1536.7						0.832	0			0.3801 4005.235 4005.2						0.416	0
0.84	8	0.84	0	0.84	0		0.84	10	0.84	0	0.84	0		0.42	1	0.42	0	0.42	0		2.4745 1341.750 259.890 1601.6						0.84	0.0008			1.5253 489.325 1022.942 1512.3						0.84	0			0.3837 3965.382 3965.4						0.42	0
0.848	9	0.848	0	0.848	0		0.848	10	0.848	0	0.848	0		0.424	2	0.424	0	0.424	0		2.4979 1331.812 252.249 1584.1						0.848	0.0009			1.5397 487.275 1001.067 1488.3						0.848	0			0.3873 3925.926 3925.9						0.424	0
0.856	12	0.856	0	0.856	0		0.856	11	0.856	0	0.856	0		0.428	4	0.428	0	0.428	0		2.5212 1321.947 244.832 1566.8						0.856	0.0012			1.5540 485.234 979.659 1464.9						0.856	0			0.3909 3886.862 3886.9						0.428	0
0.864	8	0.864	0	0.864	0		0.864	15	0.864	0	0.864	0		0.432	6	0.432	0	0.432	0		2.5445 1312.155 237.633 1549.8						0.864	0.0008			1.5684 483.202 958.709 1441.9						0.864	0			0.3946 3848.187 3848.2						0.432	0
0.872	8	0.872	0	0.872	0		0.872	11	0.872	0	0.872	0		0.436	5	0.436	0	0.436	0		2.5679 1302.436 230.646 1533.1						0.872	0.0008			1.5828 481.178 938.207 1419.4						0.872	0			0.3982 3809.897 3809.9						0.436	0
0.88	14	0.88	0	0.88	0		0.88	20	0.88	0	0.88	0		0.44	7	0.44	0	0.44	0		2.5912 1292.789 223.865 1516.7						0.88	0.0014			1.5972 479.163 918.143 1397.3						0.88	0			0.4018 3771.988 3772.0						0.44	0
0.888	9	0.888	0	0.888	0		0.888	13	0.888	0	0.888	0		0.444	4	0.444	0	0.444	0		2.6146 1283.213 217.283 1500.5						0.888	0.0009			1.6116 477.156 898.509 1375.7						0.888	0			0.4054 3734.456 3734.5						0.444	0
0.896	8	0.896	0	0.896	0		0.896	15	0.896	0	0.896	0		0.448	4	0.448	0	0.448	0		2.6379 1273.708 210.894 1484.6						0.896	0.0008			1.6260 475.157 879.294 1354.5						0.896	0			0.4090 3697.298 3697.3						0.448	0
0.904	3	0.904	0	0.904	0		0.904	15	0.904	0	0.904	0		0.452	7	0.452	0	0.452	0		2.6613 1264.274 204.693 1469.0						0.904	0.0003			1.6404 473.167 860.490 1333.7						0.904	0			0.4127 3660.509 3660.5						0.452	0
0.912	10	0.912	0	0.912	0		0.912	10	0.912	0	0.912	0		0.456	3	0.456	0	0.456	0		2.6846 1254.909 198.675 1453.6						0.912	0.001			1.6548 471.185 842.089 1313.3						0.912	0			0.4163 3624.086 3624.1						0.456	0
0.92	15	0.92	0	0.92	0		0.92	12	0.92	0	0.92	0		0.46	0	0.46	0	0.46	0		2.7080 1245.614 192.833 1438.4						0.92	0.0015			1.6692 469.211 824.081 1293.3						0.92	0			0.4199 3588.026 3588.0						0.46	0
0.928	4	0.928	0	0.928	0		0.928	12	0.928	0	0.928	0		0.464	2	0.464	0	0.464	0		2.7313 1236.388 187.163 1423.6						0.928	0.0004			1.6835 467.246 806.458 1273.7						0.928	0			0.4235 3552.325 3552.3						0.464	0
0.936	11	0.936	0	0.936	0		0.936	18	0.936	0	0.936	0		0.468	3	0.468	0	0.468	0		2.7546 1227.230 181.660 1408.9						0.936	0.0011			1.6979 465.289 789.211 1254.5						0.936	0			0.4271 3516.978 3517.0						0.468	0
0.944	11	0.944	0	0.944	0		0.944	17	0.944	0	0.944	0		0.472	4	0.472	0	0.472	0		2.7780 1218.140 176.319 1394.5						0.944	0.0011			1.7123 463.340 772.334 1235.7						0.944	0			0.4308 3481.984 3482.0						0.472	0
0.952	13	0.952	0	0.952	0		0.952	13	0.952	0	0.952	0		0.476	1	0.476	0	0.476	0		2.8013 1209.117 171.135 1380.3						0.952	0.0013			1.7267 461.399 755.818 1217.2						0.952	0			0.4344 3447.337 3447.3						0.476	0
0.96	9	0.96	0	0.96	0		0.96	10	0.96	0	0.96	0		0.48	7	0.48	0	0.48	0		2.8247 1200.161 166.103 1366.3						0.96	0.0009			1.7411 459.467 739.655 1199.1						0.96	0			0.4380 3413.036 3413.0						0.48	0
0.968	9	0.968	0	0.968	0		0.968	11	0.968	0	0.968	0		0.484	4	0.484	0	0.484	0		2.8480 1191.271 161.219 1352.5						0.968	0.0009			1.7555 457.542 723.837 1181.4						0.968	0			0.4416 3379.076 3379.1						0.484	0
0.976	11	0.976	0	0.976	0		0.976	13	0.976	0	0.976	0		0.488	4	0.488	0	0.488	0		2.8714 1182.447 156.479 1338.9						0.976	0.0011			1.7699 455.626 708.358 1164.0						0.976	0			0.4452 3345.453 3345.5						0.488	0
0.984	10	0.984	0	0.984	0		0.984	16	0.984	0	0.984	0		0.492	3	0.492	0	0.492	0		2.8947 1173.689 151.878 1325.6						0.984	0.001			1.7843 453.717 693.209 1146.9						0.984	0			0.4489 3312.165 3312.2						0.492	0
0.992	3	0.992	0	0.992	0		0.992	11	0.992	0	0.992	0		0.496	3	0.496	0	0.496	0		2.9181 1164.995 147.413 1312.4						0.992	0.0003			1.7987 451.817 678.385 1130.2						0.992	0			0.4525 3279.209 3279.2						0.496	0
1	5	1	0	1	0		1	13	1	0	1	0		0.5	4	0.5	0	0.5	0		2.9414 1156.366 143.078 1299.4						1	0.0005			1.8131 449.924 663.878 1113.8						1	0			0.4561 3246.580 3246.6						0.5	0
1.008	12	1.008	0	1.008	0		1.008	11	1.008	0	1.008	0		0.504	4	0.504	0	0.504	0		2.9647 1147.801 138.871 1286.7						1.008	0.0012			1.8274 448.040 649.681 1097.7						1.008	0			0.4597 3214.276 3214.3						0.504	0
1.016	12	1.016	0	1.016	0		1.016	9	1.016	0	1.016	0		0.508	0	0.508	0	0.508	0		2.9881 1139.299 134.788 1274.1						1.016	0.0012			1.8418 446.163 635.787 1082.0						1.016	0			0.4633 3182.294 3182.3						0.508	0
1.024	14	1.024	0	1.024	0		1.024	13	1.024	0	1.024	0		0.512	2	0.512	0	0.512	0		3.0114 1130.860 130.825 1261.7						1.024	0.0014			1.8562 444.295 622.191 1066.5						1.024	0			0.4670 3150.629 3150.6						0.512	0
1.032	16	1.032	0	1.032	0		1.032	13	1.032	0	1.032	0		0.516	1	0.516	0	0.516	0		3.0348 1122.484 126.979 1249.5						1.032	0.0016			1.8706 442.434 608.885 1051.3						1.032	0			0.4706 3119.280 3119.3						0.516	0
1.04	13	1.04	0	1.04	0		1.04	11	1.04	0	1.04	0		0.52	2	0.52	0	0.52	0		3.0581 1114.169 123.245 1237.4						1.04	0.0013			1.8850 440.580 595.864 1036.4						1.04	0			0.4742 3088.243 3088.2						0.52	0
1.048	18	1.048	0	1.048	0		1.048	10	1.048	0	1.048	0		0.524	4	0.524	0	0.524	0		3.0815 1105.917 119.621 1225.5						1.048	0.0018			1.8994 438.735 583.122 1021.9						1.048	0			0.4778 3057.514 3057.5						0.524	0
1.056	12	1.056	0	1.056	0		1.056	16	1.056	0	1.056	0		0.528	4	0.528	0	0.528	0		3.1048 1097.725 116.104 1213.8						1.056	0.0012			1.9138 436.897 570.652 1007.5						1.056	0			0.4814 3027.091 3027.1						0.528	0
1.064	16	1.064	0	1.064	0		1.064	6	1.064	0	1.064	0		0.532	5	0.532	0	0.532	0		3.1282 1089.594 112.690 1202.3						1.064	0.0016			1.9282 435.067 558.448 993.5						1.064	0			0.4851 2996.971 2997.0						0.532	0
1.072	9	1.072	0	1.072	0		1.072	7	1.072	0	1.072	0		0.536	1	0.536	0	0.536	0		3.1515 1081.523 109.377 1190.9						1.072	0.0009			1.9426 433.245 546.506 979.8						1.072	0			0.4887 2967.151 2967.2						0.536	0
1.08	13	1.08	0	1.08	0		1.08	10	1.08	0	1.08	0		0.54	2	0.54	0	0.54	0		3.1748 1073.512 106.161 1179.7						1.08	0.0013			1.9569 431.430 534.819 966.2						1.08	0			0.4923 2937.627 2937.6						0.54	0
1.088	15	1.088	0	1.088	0		1.088	9	1.088	0	1.088	0		0.544	2	0.544	0	0.544	0		3.1982 1065.561 103.040 1168.6						1.088	0.0015			1.9713 429.623 523.382 953.0						1.088	0			0.4959 2908.397 2908.4						0.544	0
1.096	10	1.096	0	1.096	0		1.096	10	1.096	0	1.096	0		0.548	7	0.548	0	0.548	0		3.2215 1057.668 100.010 1157.7						1.096	0.001			1.9857 427.824 512.189 940.0						1.096	0			0.4995 2879.458 2879.5						0.548	0
1.104	13	1.104	0	1.104	0		1.104	8	1.104	0	1.104	0		0.552	3	0.552	0	0.552	0		3.2449 1049.834 97.070 1146.9						1.104	0.0013			2.0001 426.032 501.236 927.3						1.104	0			0.5032 2850.807 2850.8						0.552	0
1.112	9	1.112	0	1.112	0		1.112	11	1.112	0	1.112	0		0.556	4	0.556	0	0.556	0		3.2682 1042.058 94.215 1136.3						1.112	0.0009			2.0145 424.247 490.517 914.8						1.112	0			0.5068 2822.441 2822.4						0.556	0
1.12	11	1.12	0	1.12	0		1.12	9	1.12	0	1.12	0		0.56	4	0.56	0	0.56	0		3.2916 1034.339 91.445 1125.8						1.12	0.0011			2.0289 422.470 480.027 902.5						1.12	0			0.5104 2794.357 2794.4						0.56	0
1.128	8	1.128	0	1.128	0		1.128	9	1.128	0	1.128	0		0.564	5	0.564	0	0.564	0		3.3149 1026.678 88.757 1115.4						1.128	0.0008			2.0433 420.701 469.762 890.5						1.128	0			0.5140 2766.553 2766.6						0.564	0
1.136	14	1.136	0	1.136	0		1.136	16	1.136	0	1.136	0		0.568	3	0.568	0	0.568	0		3.3383 1019.073 86.147 1105.2						1.136	0.0014			2.0577 418.939 459.716 878.7						1.136	0			0.5176 2739.025 2739.0						0.568	0
1.144	8	1.144	0	1.144	0		1.144	14	1.144	0	1.144	0		0.572	2	0.572	0	0.572	0		3.3616 1011.525 83.614 1095.1						1.144	0.0008			2.0721 417.184 449.885 867.1						1.144	0			0.5213 2711.772 2711.8						0.572	0
1.152	9	1.152	0	1.152	0		1.152	12	1.152	0	1.152	0		0.576	3	0.576	0	0.576	0		3.3849 1004.032 81.155 1085.2						1.152	0.0009			2.0865 415.437 440.264 855.7						1.152	0			0.5249 2684.789 2684.8						0.576	0
1.16	12	1.16	0	1.16	0		1.16	10	1.16	0	1.16	0		0.58	3	0.58	0	0.58	0		3.4083 996.595 78.769 1075.4						1.16	0.0012			2.1008 413.697 430.849 844.5						1.16	0			0.5285 2658.075 2658.1						0.58	0
1.168	6	1.168	0	1.168	0		1.168	11	1.168	0	1.168	0		0.584	4	0.584	0	0.584	0		3.4316 989.214 76.453 1065.7						1.168	0.0006			2.1152 411.964 421.635 833.6						1.168	0			0.5321 2631.627 2631.6						0.584	0
1.176	6	1.176	0	1.176	0		1.176	15	1.176	0	1.176	0		0.588	3	0.588	0	0.588	0		3.4550 981.886 74.205 1056.1						1.176	0.0006			2.1296 410.238 412.619 822.9						1.176	0			0.5357 2605.442 2605.4						0.588	0
1.184	13	1.184	0	1.184	0		1.184	11	1.184	0	1.184	0		0.592	3	0.592	0	0.592	0		3.4783 974.613 72.024 1046.6						1.184	0.0013			2.1440 408.520 403.795 812.3						1.184	0			0.5394 2579.517 2579.5						0.592	0
1.192	7	1.192	0	1.192	0		1.192	10	1.192	0	1.192	0		0.596	5	0.596	0	0.596	0		3.5017 967.394 69.906 1037.3						1.192	0.0007			2.1584 406.809 395.160 802.0						1.192	0			0.5430 2553.850 2553.9						0.596	0
1.2	5	1.2	0	1.2	0		1.2	9	1.2	0	1.2	0		0.6	3	0.6	0	0.6	0		3.5250 960.229 67.850 1028.1						1.2	0.0005			2.1728 405.105 386.709 791.8						1.2	0			0.5466 2528.439 2528.4						0.6	0
1.208	10	1.208	0	1.208	0		1.208	12	1.208	0	1.208	0		0.604	8	0.604	0	0.604	0		3.5483 953.116 65.856 1019.0						1.208	0.001			2.1872 403.408 378.439 781.8						1.208	0			0.5502 2503.281 2503.3						0.604	0
1.216	12	1.216	0	1.216	0		1.216	7	1.216	0	1.216	0		0.608	5	0.608	0	0.608	0		3.5717 946.057 63.919 1010.0						1.216	0.0012			2.2016 401.718 370.346 772.1						1.216	0			0.5538 2478.373 2478.4						0.608	0
1.224	11	1.224	0	1.224	0		1.224	9	1.224	0	1.224	0		0.612	4	0.612	0	0.612	0		3.5950 939.049 62.040 1001.1						1.224	0.0011			2.2160 400.036 362.427 762.5						1.224	0			0.5575 2453.713 2453.7						0.612	0
1.232	6	1.232	0	1.232	0		1.232	20	1.232	0	1.232	0		0.616	3	0.616	0	0.616	0		3.6184 932.093 60.216 992.3						1.232	0.0006			2.2303 398.360 354.676 753.0						1.232	0			0.5611 2429.298 2429.3						0.616	0
1.24	8	1.24	0	1.24	0		1.24	17	1.24	0	1.24	0		0.62	3	0.62	0	0.62	0		3.6417 925.189 58.445 983.6						1.24	0.0008			2.2447 396.692 347.091 743.8						1.24	0			0.5647 2405.126 2405.1						0.62	0
1.248	8	1.248	0	1.248	0		1.248	14	1.248	0	1.248	0		0.624	3	0.624	0	0.624	0		3.6651 918.336 56.727 975.1						1.248	0.0008			2.2591 395.030 339.669 734.7						1.248	0			0.5683 2381.194 2381.2						0.624	0
1.256	11	1.256	0	1.256	0		1.256	13	1.256	0	1.256	0		0.628	5	0.628	0	0.628	0		3.6884 911.534 55.059 966.6						1.256	0.0011			2.2735 393.375 332.405 725.8						1.256	0			0.5719 2357.501 2357.5						0.628	0
1.264	15	1.264	0	1.264	0		1.264	12	1.264	0	1.264	0		0.632	7	0.632	0	0.632	0		3.7118 904.783 53.440 958.2						1.264	0.0015			2.2879 391.728 325.296 717.0						1.264	0			0.5756 2334.044 2334.0						0.632	0
1.272	12	1.272	0	1.272	0		1.272	11	1.272	0	1.272	0		0.636	6	0.636	0	0.636	0		3.7351 898.081 51.869 949.9						1.272	0.0012			2.3023 390.087 318.340 708.4						1.272	0			0.5792 2310.819 2310.8						0.636	0
1.28	16	1.28	0	1.28	0		1.28	17	1.28	0	1.28	0		0.64	3	0.64	0	0.64	0		3.7584 891.429 50.344 941.8						1.28	0.0016			2.3167 388.453 311.532 700.0						1.28	0			0.5828 2287.826 2287.8						0.64	0
1.288	7	1.288	0	1.288	0		1.288	11	1.288	0	1.288	0		0.644	4	0.644	0	0.644	0		3.7818 884.826 48.863 933.7						1.288	0.0007			2.3311 386.826 304.870 691.7						1.288	0			0.5864 2265.062 2265.1						0.644	0
1.296	9	1.296	0	1.296	0		1.296	10	1.296	0	1.296	0		0.648	8	0.648	0	0.648	0		3.8051 878.272 47.427 925.7						1.296	0.0009			2.3455 385.206 298.350 683.6						1.296	0			0.5900 2242.524 2242.5						0.648	0
1.304	9	1.304	0	1.304	0		1.304	8	1.304	0	1.304	0		0.652	3	0.652	0	0.652	0		3.8285 871.766 46.032 917.8						1.304	0.0009			2.3598 383.592 291.970 675.6						1.304	0			0.5937 2220.211 2220.2						0.652	0
1.312	9	1.312	0	1.312	0		1.312	10	1.312	0	1.312	0		0.656	1	0.656	0	0.656	0		3.8518 865.309 44.679 910.0						1.312	0.0009			2.3742 381.986 285.726 667.7						1.312	0			0.5973 2198.119 2198.1						0.656	0
1.32	13	1.32	0	1.32	0		1.32	18	1.32	0	1.32	0		0.66	4	0.66	0	0.66	0		3.8752 858.900 43.365 902.3						1.32	0.0013			2.3886 380.386 279.616 660.0						1.32	0			0.6009 2176.248 2176.2						0.66	0
1.328	6	1.328	0	1.328	0		1.328	8	1.328	0	1.328	0		0.664	4	0.664	0	0.664	0		3.8985 852.538 42.090 894.6						1.328	0.0006			2.4030 378.792 273.637 652.4						1.328	0			0.6045 2154.594 2154.6						0.664	0
1.336	9	1.336	0	1.336	0		1.336	15	1.336	0	1.336	0		0.668	6	0.668	0	0.668	0		3.9219 846.223 40.853 887.1						1.336	0.0009			2.4174 377.206 267.785 645.0						1.336	0			0.6081 2133.155 2133.2						0.668	0
1.344	11	1.344	0	1.344	0		1.344	13	1.344	0	1.344	0		0.672	3	0.672	0	0.672	0		3.9452 839.955 39.651 879.6						1.344	0.0011			2.4318 375.626 262.058 637.7						1.344	0			0.6118 2111.930 2111.9						0.672	0
1.352	11	1.352	0	1.352	0		1.352	12	1.352	0	1.352	0		0.676	2	0.676	0	0.676	0		3.9685 833.733 38.486 872.2						1.352	0.0011			2.4462 374.052 256.454 630.5						1.352	0			0.6154 2090.916 2090.9						0.676	0
1.36	12	1.36	0	1.36	0		1.36	11	1.36	0	1.36	0		0.68	3	0.68	0	0.68	0		3.9919 827.558 37.354 864.9						1.36	0.0012			2.4606 372.486 250.970 623.5						1.36	0			0.6190 2070.111 2070.1						0.68	0
1.368	5	1.368	0	1.368	0		1.368	18	1.368	0	1.368	0		0.684	3	0.684	0	0.684	0		4.0152 821.428 36.256 857.7						1.368	0.0005			2.4750 370.926 245.603 616.5						1.368	0			0.6226 2049.513 2049.5						0.684	0
1.376	10	1.376	0	1.376	0		1.376	17	1.376	0	1.376	0		0.688	3	0.688	0	0.688	0		4.0386 815.344 35.190 850.5						1.376	0.001			2.4894 369.372 240.351 609.7						1.376	0			0.6262 2029.120 2029.1						0.688	0
1.384	9	1.384	0	1.384	0		1.384	11	1.384	0	1.384	0		0.692	2	0.692	0	0.692	0		4.0619 809.304 34.155 843.5						1.384	0.0009			2.5037 367.825 235.211 603.0						1.384	0			0.6299 2008.930 2008.9						0.692	0
1.392	10	1.392	0	1.392	0		1.392	12	1.392	0	1.392	0		0.696	5	0.696	0	0.696	0		4.0853 803.310 33.151 836.5						1.392	0.001			2.5181 366.284 230.181 596.5						1.392	0			0.6335 1988.941 1988.9						0.696	0
1.4	8	1.4	0	1.4	0		1.4	14	1.4	0	1.4	0		0.7	9	0.7	0	0.7	0		4.1086 797.360 32.176 829.5						1.4	0.0008			2.5325 364.750 225.258 590.0						1.4	0			0.6371 1969.150 1969.2						0.7	0
1.408	10	1.408	0	1.408	0		1.408	14	1.408	0	1.408	0		0.704	4	0.704	0	0.704	0		4.1320 791.454 31.230 822.7						1.408	0.001			2.5469 363.222 220.441 583.7						1.408	0			0.6407 1949.557 1949.6						0.704	0
1.416	21	1.416	0	1.416	0		1.416	10	1.416	0	1.416	0		0.708	4	0.708	0	0.708	0		4.1553 785.591 30.312 815.9						1.416	0.0021			2.5613 361.701 215.727 577.4						1.416	0			0.6443 1930.159 1930.2						0.708	0
1.424	14	1.424	0	1.424	0		1.424	18	1.424	0	1.424	0		0.712	4	0.712	0	0.712	0		4.1786 779.772 29.421 809.2						1.424	0.0014			2.5757 360.186 211.114 571.3						1.424	0			0.6479 1910.953 1911.0						0.712	0
1.432	11	1.432	0	1.432	0		1.432	12	1.432	0	1.432	0		0.716	3	0.716	0	0.716	0		4.2020 773.996 28.555 802.6						1.432	0.0011			2.5901 358.677 206.599 565.3						1.432	0			0.6516 1891.939 1891.9						0.716	0
1.44	8	1.44	0	1.44	0		1.44	11	1.44	0	1.44	0		0.72	3	0.72	0	0.72	0		4.2253 768.263 27.716 796.0						1.44	0.0008			2.6045 357.175 202.181 559.4						1.44	0			0.6552 1873.114 1873.1						0.72	0
1.448	7	1.448	0	1.448	0		1.448	14	1.448	0	1.448	0		0.724	6	0.724	0	0.724	0		4.2487 762.573 26.901 789.5						1.448	0.0007			2.6189 355.679 197.857 553.5						1.448	0			0.6588 1854.476 1854.5						0.724	0
1.456	6	1.456	0	1.456	0		1.456	12	1.456	0	1.456	0		0.728	5	0.728	0	0.728	0		4.2720 756.924 26.110 783.0						1.456	0.0006			2.6332 354.189 193.626 547.8						1.456	0			0.6624 1836.024 1836.0						0.728	0
1.464	8	1.464	0	1.464	0		1.464	14	1.464	0	1.464	0		0.732	6	0.732	0	0.732	0		4.2954 751.318 25.342 776.7						1.464	0.0008			2.6476 352.705 189.485 542.2						1.464	0			0.6660 1817.755 1817.8						0.732	0
1.472	15	1.472	0	1.472	0		1.472	10	1.472	0	1.472	0		0.736	6	0.736	0	0.736	0		4.3187 745.753 24.597 770.3						1.472	0.0015			2.6620 351.228 185.433 536.7						1.472	0			0.6697 1799.668 1799.7						0.736	0
1.48	13	1.48	0	1.48	0		1.48	18	1.48	0	1.48	0		0.74	4	0.74	0	0.74	0		4.3421 740.229 23.874 764.1						1.48	0.0013			2.6764 349.757 181.468 531.2						1.48	0			0.6733 1781.761 1781.8						0.74	0
1.488	11	1.488	0	1.488	0		1.488	20	1.488	0	1.488	0		0.744	6	0.744	0	0.744	0		4.3654 734.746 23.172 757.9						1.488	0.0011			2.6908 348.292 177.587 525.9						1.488	0			0.6769 1764.032 1764.0						0.744	0
1.496	6	1.496	0	1.496	0		1.496	5	1.496	0	1.496	0		0.748	2	0.748	0	0.748	0		4.3887 729.304 22.491 751.8						1.496	0.0006			2.7052 346.833 173.789 520.6						1.496	0			0.6805 1746.480 1746.5						0.748	0
1.504	14	1.504	0	1.504	0		1.504	14	1.504	0	1.504	0		0.752	5	0.752	0	0.752	0		4.4121 723.902 21.829 745.7						1.504	0.0014			2.7196 345.380 170.073 515.5						1.504	0			0.6841 1729.102 1729.1						0.752	0
1.512	11	1.512	0	1.512	0		1.512	7	1.512	0	1.512	0		0.756	4	0.756	0	0.756	0		4.4354 718.540 21.188 739.7						1.512	0.0011			2.7340 343.934 166.436 510.4						1.512	0			0.6878 1711.897 1711.9						0.756	0
1.52	9	1.52	0	1.52	0		1.52	17	1.52	0	1.52	0		0.76	5	0.76	0	0.76	0		4.4588 713.217 20.565 733.8						1.52	0.0009			2.7484 342.493 162.877 505.4						1.52	0			0.6914 1694.863 1694.9						0.76	0
1.528	9	1.528	0	1.528	0		1.528	9	1.528	0	1.528	0		0.764	6	0.764	0	0.764	0		4.4821 707.935 19.960 727.9						1.528	0.0009			2.7627 341.059 159.393 500.5						1.528	0			0.6950 1677.999 1678.0						0.764	0
1.536	12	1.536	0	1.536	0		1.536	12	1.536	0	1.536	0		0.768	2	0.768	0	0.768	0		4.5055 702.691 19.373 722.1						1.536	0.0012			2.7771 339.630 155.985 495.6						1.536	0			0.6986 1661.303 1661.3						0.768	0
1.544	12	1.544	0	1.544	0		1.544	10	1.544	0	1.544	0		0.772	8	0.772	0	0.772	0		4.5288 697.486 18.803 716.3						1.544	0.0012			2.7915 338.207 152.649 490.9						1.544	0			0.7022 1644.773 1644.8						0.772	0
1.552	5	1.552	0	1.552	0		1.552	13	1.552	0	1.552	0		0.776	9	0.776	0	0.776	0		4.5522 692.320 18.251 710.6						1.552	0.0005			2.8059 336.791 149.385 486.2						1.552	0			0.7059 1628.407 1628.4						0.776	0
1.56	9	1.56	0	1.56	0		1.56	19	1.56	0	1.56	0		0.78	5	0.78	0	0.78	0		4.5755 687.192 17.714 704.9						1.56	0.0009			2.8203 335.380 146.190 481.6						1.56	0			0.7095 1612.204 1612.2						0.78	0
1.568	12	1.568	0	1.568	0		1.568	13	1.568	0	1.568	0		0.784	3	0.784	0	0.784	0		4.5988 682.101 17.193 699.3						1.568	0.0012			2.8347 333.975 143.064 477.0						1.568	0			0.7131 1596.162 1596.2						0.784	0
1.576	8	1.576	0	1.576	0		1.576	10	1.576	0	1.576	0		0.788	0	0.788	0	0.788	0		4.6222 677.049 16.688 693.7						1.576	0.0008			2.8491 332.577 140.004 472.6						1.576	0			0.7167 1580.280 1580.3						0.788	0
1.584	11	1.584	0	1.584	0		1.584	12	1.584	0	1.584	0		0.792	3	0.792	0	0.792	0		4.6455 672.034 16.197 688.2						1.584	0.0011			2.8635 331.184 137.010 468.2						1.584	0			0.7203 1564.556 1564.6						0.792	0
1.592	11	1.592	0	1.592	0		1.592	8	1.592	0	1.592	0		0.796	3	0.796	0	0.796	0		4.6689 667.056 15.721 682.8						1.592	0.0011			2.8779 329.796 134.080 463.9						1.592	0			0.7240 1548.989 1549.0						0.796	0
1.6	6	1.6	0	1.6	0		1.6	8	1.6	0	1.6	0		0.8	1	0.8	0	0.8	0		4.6922 662.115 15.259 677.4						1.6	0.0006			2.8923 328.415 131.213 459.6						1.6	0			0.7276 1533.576 1533.6						0.8	0
1.608	9	1.608	0	1.608	0		1.608	14	1.608	0	1.608	0		0.804	4	0.804	0	0.804	0		4.7156 657.211 14.810 672.0						1.608	0.0009			2.9066 327.039 128.407 455.4						1.608	0			0.7312 1518.317 1518.3						0.804	0
1.616	12	1.616	0	1.616	0		1.616	14	1.616	0	1.616	0		0.808	5	0.808	0	0.808	0		4.7389 652.343 14.374 666.7						1.616	0.0012			2.9210 325.670 125.661 451.3						1.616	0			0.7348 1503.209 1503.2						0.808	0
1.624	10	1.624	0	1.624	0		1.624	16	1.624	0	1.624	0		0.812	3	0.812	0	0.812	0		4.7623 647.511 13.952 661.5						1.624	0.001			2.9354 324.306 122.974 447.3						1.624	0			0.7384 1488.252 1488.3						0.812	0
1.632	14	1.632	0	1.632	0		1.632	9	1.632	0	1.632	0		0.816	3	0.816	0	0.816	0		4.7856 642.715 13.542 656.3						1.632	0.0014			2.9498 322.947 120.344 443.3						1.632	0			0.7421 1473.444 1473.4						0.816	0
1.64	13	1.64	0	1.64	0		1.64	13	1.64	0	1.64	0		0.82	3	0.82	0	0.82	0		4.8089 637.954 13.143 651.1						1.64	0.0013			2.9642 321.594 117.770 439.4						1.64	0			0.7457 1458.783 1458.8						0.82	0
1.648	9	1.648	0	1.648	0		1.648	18	1.648	0	1.648	0		0.824	3	0.824	0	0.824	0		4.8323 633.229 12.757 646.0						1.648	0.0009			2.9786 320.247 115.252 435.5						1.648	0			0.7493 1444.267 1444.3						0.824	0
1.656	10	1.656	0	1.656	0		1.656	11	1.656	0	1.656	0		0.828	2	0.828	0	0.828	0		4.8556 628.539 12.382 640.9						1.656	0.001			2.9930 318.906 112.787 431.7						1.656	0			0.7529 1429.897 1429.9						0.828	0
1.664	5	1.664	0	1.664	0		1.664	11	1.664	0	1.664	0		0.832	11	0.832	0	0.832	0		4.8790 623.883 12.018 635.9						1.664	0.0005			3.0074 317.570 110.375 427.9						1.664	0			0.7565 1415.669 1415.7						0.832	0
1.672	11	1.672	0	1.672	0		1.672	14	1.672	0	1.672	0		0.836	6	0.836	0	0.836	0		4.9023 619.262 11.664 630.9						1.672	0.0011			3.0218 316.240 108.015 424.3						1.672	0			0.7602 1401.583 1401.6						0.836	0
1.68	9	1.68	0	1.68	0		1.68	11	1.68	0	1.68	0		0.84	3	0.84	0	0.84	0		4.9257 614.675 11.321 626.0						1.68	0.0009			3.0361 314.916 105.705 420.6						1.68	0			0.7638 1387.637 1387.6						0.84	0
1.688	4	1.688	0	1.688	0		1.688	13	1.688	0	1.688	0		0.844	3	0.844	0	0.844	0		4.9490 610.122 10.989 621.1						1.688	0.0004			3.0505 313.597 103.444 417.0						1.688	0			0.7674 1373.830 1373.8						0.844	0
1.696	9	1.696	0	1.696	0		1.696	10	1.696	0	1.696	0		0.848	2	0.848	0	0.848	0		4.9724 605.603 10.666 616.3						1.696	0.0009			3.0649 312.283 101.232 413.5						1.696	0			0.7710 1360.160 1360.2						0.848	0
1.704	8	1.704	0	1.704	0		1.704	20	1.704	0	1.704	0		0.852	2	0.852	0	0.852	0		4.9957 601.117 10.352 611.5						1.704	0.0008			3.0793 310.975 99.067 410.0						1.704	0			0.7746 1346.626 1346.6						0.852	0
1.712	11	1.712	0	1.712	0		1.712	6	1.712	0	1.712	0		0.856	4	0.856	0	0.856	0		5.0190 596.665 10.048 606.7						1.712	0.0011			3.0937 309.672 96.949 406.6						1.712	0			0.7783 1333.227 1333.2						0.856	0
1.72	14	1.72	0	1.72	0		1.72	13	1.72	0	1.72	0		0.86	5	0.86	0	0.86	0		5.0424 592.245 9.752 602.0						1.72	0.0014			3.1081 308.375 94.876 403.3						1.72	0			0.7819 1319.961 1320.0						0.86	0
1.728	14	1.728	0	1.728	0		1.728	11	1.728	0	1.728	0		0.864	4	0.864	0	0.864	0		5.0657 587.858 9.465 597.3						1.728	0.0014			3.1225 307.084 92.847 399.9						1.728	0			0.7855 1306.827 1306.8						0.864	0
1.736	6	1.736	0	1.736	0		1.736	9	1.736	0	1.736	0		0.868	4	0.868	0	0.868	0		5.0891 583.504 9.187 592.7						1.736	0.0006			3.1369 305.797 90.861 396.7						1.736	0			0.7891 1293.824 1293.8						0.868	0
1.744	12	1.744	0	1.744	0		1.744	12	1.744	0	1.744	0		0.872	4	0.872	0	0.872	0		5.1124 579.182 8.917 588.1						1.744	0.0012			3.1513 304.517 88.918 393.4						1.744	0			0.7927 1280.950 1281.0						0.872	0
1.752	9	1.752	0	1.752	0		1.752	12	1.752	0	1.752	0		0.876	5	0.876	0	0.876	0		5.1358 574.892 8.655 583.5						1.752	0.0009			3.1656 303.241 87.017 390.3						1.752	0			0.7964 1268.205 1268.2						0.876	0
1.76	13	1.76	0	1.76	0		1.76	10	1.76	0	1.76	0		0.88	2	0.88	0	0.88	0		5.1591 570.634 8.400 579.0						1.76	0.0013			3.1800 301.971 85.156 387.1						1.76	0			0.8000 1255.586 1255.6						0.88	0
1.768	12	1.768	0	1.768	0		1.768	13	1.768	0	1.768	0		0.884	5	0.884	0	0.884	0		5.1825 566.407 8.153 574.6						1.768	0.0012			3.1944 300.706 83.335 384.0						1.768	0			0.8036 1243.092 1243.1						0.884	0
1.776	9	1.776	0	1.776	0		1.776	15	1.776	0	1.776	0		0.888	4	0.888	0	0.888	0		5.2058 562.211 7.914 570.1						1.776	0.0009			3.2088 299.447 81.553 381.0						1.776	0			0.8072 1230.723 1230.7						0.888	0
1.784	10	1.784	0	1.784	0		1.784	12	1.784	0	1.784	0		0.892	4	0.892	0	0.892	0		5.2291 558.047 7.681 565.7						1.784	0.001			3.2232 298.192 79.809 378.0						1.784	0			0.8108 1218.478 1218.5						0.892	0
1.792	12	1.792	0	1.792	0		1.792	13	1.792	0	1.792	0		0.896	5	0.896	0	0.896	0		5.2525 553.914 7.455 561.4						1.792	0.0012			3.2376 296.943 78.102 375.0						1.792	0			0.8145 1206.354 1206.4						0.896	0
1.8	9	1.8	0	1.8	0		1.8	10	1.8	0	1.8	0		0.9	2	0.9	0	0.9	0		5.2758 549.811 7.236 557.0						1.8	0.0009			3.2520 295.700 76.432 372.1						1.8	0			0.8181 1194.350 1194.4						0.9	0
1.808	11	1.808	0	1.808	0		1.808	17	1.808	0	1.808	0		0.904	7	0.904	0	0.904	0		5.2992 545.738 7.023 552.8						1.808	0.0011			3.2664 294.461 74.797 369.3						1.808	0			0.8217 1182.466 1182.5						0.904	0
1.816	12	1.816	0	1.816	0		1.816	7	1.816	0	1.816	0		0.908	3	0.908	0	0.908	0		5.3225 541.696 6.817 548.5						1.816	0.0012			3.2808 293.228 73.198 366.4						1.816	0			0.8253 1170.700 1170.7						0.908	0
1.824	8	1.824	0	1.824	0		1.824	18	1.824	0	1.824	0		0.912	5	0.912	0	0.912	0		5.3459 537.683 6.616 544.3						1.824	0.0008			3.2952 292.000 71.632 363.6						1.824	0			0.8289 1159.052 1159.1						0.912	0
1.832	4	1.832	0	1.832	0		1.832	10	1.832	0	1.832	0		0.916	4	0.916	0	0.916	0		5.3692 533.701 6.422 540.1						1.832	0.0004			3.3095 290.776 70.100 360.9						1.832	0			0.8326 1147.519 1147.5						0.916	0
1.84	16	1.84	0	1.84	0		1.84	11	1.84	0	1.84	0		0.92	5	0.92	0	0.92	0		5.3926 529.748 6.233 536.0						1.84	0.0016			3.3239 289.559 68.601 358.2						1.84	0			0.8362 1136.101 1136.1						0.92	0
1.848	9	1.848	0	1.848	0		1.848	15	1.848	0	1.848	0		0.924	3	0.924	0	0.924	0		5.4159 525.824 6.050 531.9						1.848	0.0009			3.3383 288.346 67.134 355.5						1.848	0			0.8398 1124.797 1124.8						0.924	0
1.856	16	1.856	0	1.856	0		1.856	18	1.856	0	1.856	0		0.928	4	0.928	0	0.928	0		5.4392 521.929 5.872 527.8						1.856	0.0016			3.3527 287.138 65.699 352.8						1.856	0			0.8434 1113.605 1113.6						0.928	0
1.864	7	1.864	0	1.864	0		1.864	14	1.864	0	1.864	0		0.932	5	0.932	0	0.932	0		5.4626 518.063 5.699 523.8						1.864	0.0007			3.3671 285.935 64.294 350.2						1.864	0			0.8470 1102.524 1102.5						0.932	0
1.872	3	1.872	0	1.872	0		1.872	8	1.872	0	1.872	0		0.936	3	0.936	0	0.936	0		5.4859 514.226 5.532 519.8						1.872	0.0003			3.3815 284.738 62.919 347.7						1.872	0			0.8507 1091.554 1091.6						0.936	0
1.88	6	1.88	0	1.88	0		1.88	11	1.88	0	1.88	0		0.94	5	0.94	0	0.94	0		5.5093 510.417 5.369 515.8						1.88	0.0006			3.3959 283.545 61.573 345.1						1.88	0			0.8543 1080.693 1080.7						0.94	0
1.888	6	1.888	0	1.888	0		1.888	15	1.888	0	1.888	0		0.944	6	0.944	0	0.944	0		5.5326 506.636 5.211 511.8						1.888	0.0006			3.4103 282.357 60.256 342.6						1.888	0			0.8579 1069.940 1069.9						0.944	0
1.896	11	1.896	0	1.896	0		1.896	14	1.896	0	1.896	0		0.948	5	0.948	0	0.948	0		5.5560 502.883 5.058 507.9						1.896	0.0011			3.4247 281.175 58.968 340.1						1.896	0			0.8615 1059.294 1059.3						0.948	0
1.904	6	1.904	0	1.904	0		1.904	11	1.904	0	1.904	0		0.952	0	0.952	0	0.952	0		5.5793 499.159 4.909 504.1						1.904	0.0006			3.4390 279.997 57.707 337.7						1.904	0			0.8651 1048.753 1048.8						0.952	0
1.912	11	1.912	0	1.912	0		1.912	13	1.912	0	1.912	0		0.956	4	0.956	0	0.956	0		5.6027 495.461 4.765 500.2						1.912	0.0011			3.4534 278.824 56.473 335.3						1.912	0			0.8688 1038.318 1038.3						0.956	0
1.92	10	1.92	0	1.92	0		1.92	12	1.92	0	1.92	0		0.96	4	0.96	0	0.96	0		5.6260 491.791 4.625 496.4						1.92	0.001			3.4678 277.656 55.265 332.9						1.92	0			0.8724 1027.987 1028.0						0.96	0
1.928	6	1.928	0	1.928	0		1.928	16	1.928	0	1.928	0		0.964	5	0.964	0	0.964	0		5.6493 488.149 4.489 492.6						1.928	0.0006			3.4822 276.493 54.083 330.6						1.928	0			0.8760 1017.758 1017.8						0.964	0
1.936	15	1.936	0	1.936	0		1.936	13	1.936	0	1.936	0		0.968	5	0.968	0	0.968	0		5.6727 484.533 4.357 488.9						1.936	0.0015			3.4966 275.335 52.927 328.3						1.936	0			0.8796 1007.631 1007.6						0.968	0
1.944	3	1.944	0	1.944	0		1.944	12	1.944	0	1.944	0		0.972	4	0.972	0	0.972	0		5.6960 480.944 4.229 485.2						1.944	0.0003			3.5110 274.182 51.795 326.0						1.944	0			0.8832 997.605 997.6						0.972	0
1.952	10	1.952	0	1.952	0		1.952	13	1.952	0	1.952	0		0.976	3	0.976	0	0.976	0		5.7194 477.381 4.104 481.5						1.952	0.001			3.5254 273.033 50.687 323.7						1.952	0			0.8869 987.679 987.7						0.976	0
1.96	4	1.96	0	1.96	0		1.96	9	1.96	0	1.96	0		0.98	4	0.98	0	0.98	0		5.7427 473.845 3.984 477.8						1.96	0.0004			3.5398 271.890 49.603 321.5						1.96	0			0.8905 977.851 977.9						0.98	0
1.968	12	1.968	0	1.968	0		1.968	15	1.968	0	1.968	0		0.984	3	0.984	0	0.984	0		5.7661 470.336 3.866 474.2						1.968	0.0012			3.5542 270.751 48.543 319.3						1.968	0			0.8941 968.121 968.1						0.984	0
1.976	11	1.976	0	1.976	0		1.976	15	1.976	0	1.976	0		0.988	2	0.988	0	0.988	0		5.7894 466.852 3.753 470.6						1.976	0.0011			3.5685 269.617 47.504 317.1						1.976	0			0.8977 958.488 958.5						0.988	0
1.984	12	1.984	0	1.984	0		1.984	15	1.984	0	1.984	0		0.992	5	0.992	0	0.992	0		5.8128 463.394 3.642 467.0						1.984	0.0012			3.5829 268.488 46.489 315.0						1.984	0			0.9013 948.951 949.0						0.992	0
1.992	12	1.992	0	1.992	0		1.992	16	1.992	0	1.992	0		0.996	1	0.996	0	0.996	0		5.8361 459.961 3.535 463.5						1.992	0.0012			3.5973 267.363 45.494 312.9						1.992	0			0.9050 939.509 939.5						0.996	0
2	9	2	0	2	0		2	9	2	0	2	0		1	5	1	0	1	0		5.8594 456.555 3.431 460.0						2	0.0009			3.6117 266.243 44.521 310.8						2	0			0.9086 930.161 930.2						1	0
2.008	12	2.008	0	2.008	0		2.008	10	2.008	0	2.008	0		1.004	5	1.004	0	1.004	0		5.8828 453.173 3.331 456.5						2.008	0.0012			3.6261 265.128 43.569 308.7						2.008	0			0.9122 920.906 920.9						1.004	0
2.016	9	2.016	0	2.016	0		2.016	10	2.016	0	2.016	0		1.008	3	1.008	0	1.008	0		5.9061 449.816 3.233 453.0						2.016	0.0009			3.6405 264.018 42.638 306.7						2.016	0			0.9158 911.742 911.7						1.008	0
2.024	7	2.024	0	2.024	0		2.024	4	2.024	0	2.024	0		1.012	7	1.012	0	1.012	0		5.9295 446.484 3.138 449.6						2.024	0.0007			3.6549 262.912 41.726 304.6						2.024	0			0.9194 902.670 902.7						1.012	0
2.032	12	2.032	0	2.032	0		2.032	13	2.032	0	2.032	0		1.016	3	1.016	0	1.016	0		5.9528 443.177 3.045 446.2						2.032	0.0012			3.6693 261.810 40.834 302.6						2.032	0			0.9231 893.689 893.7						1.016	0
2.04	10	2.04	0	2.04	0		2.04	6	2.04	0	2.04	0		1.02	4	1.02	0	1.02	0		5.9762 439.894 2.956 442.9						2.04	0.001			3.6837 260.714 39.960 300.7						2.04	0			0.9267 884.796 884.8						1.02	0
2.048	5	2.048	0	2.048	0		2.048	12	2.048	0	2.048	0		1.024	7	1.024	0	1.024	0		5.9995 436.636 2.869 439.5						2.048	0.0005			3.6981 259.622 39.106 298.7						2.048	0			0.9303 875.992 876.0						1.024	0
2.056	9	2.056	0	2.056	0		2.056	7	2.056	0	2.056	0		1.028	2	1.028	0	1.028	0		6.0229 433.402 2.784 436.2						2.056	0.0009			3.7124 258.534 38.269 296.8						2.056	0			0.9339 867.276 867.3						1.028	0
2.064	13	2.064	0	2.064	0		2.064	12	2.064	0	2.064	0		1.032	2	1.032	0	1.032	0		6.0462 430.192 2.703 432.9						2.064	0.0013			3.7268 257.452 37.451 294.9						2.064	0			0.9375 858.647 858.6						1.032	0
2.072	14	2.072	0	2.072	0		2.072	17	2.072	0	2.072	0		1.036	6	1.036	0	1.036	0		6.0695 427.005 2.623 429.6						2.072	0.0014			3.7412 256.373 36.650 293.0						2.072	0			0.9412 850.103 850.1						1.036	0
2.08	11	2.08	0	2.08	0		2.08	12	2.08	0	2.08	0		1.04	3	1.04	0	1.04	0		6.0929 423.842 2.546 426.4						2.08	0.0011			3.7556 255.299 35.866 291.2						2.08	0			0.9448 841.644 841.6						1.04	0
2.088	12	2.088	0	2.088	0		2.088	12	2.088	0	2.088	0		1.044	2	1.044	0	1.044	0		6.1162 420.703 2.471 423.2						2.088	0.0012			3.7700 254.230 35.099 289.3						2.088	0			0.9484 833.270 833.3						1.044	0
2.096	16	2.096	0	2.096	0		2.096	13	2.096	0	2.096	0		1.048	1	1.048	0	1.048	0		6.1396 417.587 2.399 420.0						2.096	0.0016			3.7844 253.165 34.349 287.5						2.096	0			0.9520 824.979 825.0						1.048	0
2.104	10	2.104	0	2.104	0		2.104	8	2.104	0	2.104	0		1.052	4	1.052	0	1.052	0		6.1629 414.494 2.328 416.8						2.104	0.001			3.7988 252.105 33.614 285.7						2.104	0			0.9556 816.770 816.8						1.052	0
2.112	10	2.112	0	2.112	0		2.112	11	2.112	0	2.112	0		1.056	3	1.056	0	1.056	0		6.1863 411.424 2.260 413.7						2.112	0.001			3.8132 251.049 32.895 283.9						2.112	0			0.9593 808.643 808.6						1.056	0
2.12	9	2.12	0	2.12	0		2.12	7	2.12	0	2.12	0		1.06	3	1.06	0	1.06	0		6.2096 408.376 2.193 410.6						2.12	0.0009			3.8276 249.997 32.192 282.2						2.12	0			0.9629 800.597 800.6						1.06	0
2.128	11	2.128	0	2.128	0		2.128	11	2.128	0	2.128	0		1.064	3	1.064	0	1.064	0		6.2330 405.351 2.129 407.5						2.128	0.0011			3.8419 248.950 31.504 280.5						2.128	0			0.9665 792.631 792.6						1.064	0
2.136	12	2.136	0	2.136	0		2.136	11	2.136	0	2.136	0		1.068	4	1.068	0	1.068	0		6.2563 402.349 2.066 404.4						2.136	0.0012			3.8563 247.907 30.830 278.7						2.136	0			0.9701 784.744 784.7						1.068	0
2.144	13	2.144	0	2.144	0		2.144	11	2.144	0	2.144	0		1.072	5	1.072	0	1.072	0		6.2796 399.369 2.005 401.4						2.144	0.0013			3.8707 246.869 30.171 277.0						2.144	0			0.9737 776.936 776.9						1.072	0
2.152	8	2.152	0	2.152	0		2.152	17	2.152	0	2.152	0		1.076	2	1.076	0	1.076	0		6.3030 396.410 1.946 398.4						2.152	0.0008			3.8851 245.835 29.525 275.4						2.152	0			0.9774 769.205 769.2						1.076	0
2.16	15	2.16	0	2.16	0		2.16	9	2.16	0	2.16	0		1.08	5	1.08	0	1.08	0		6.3263 393.474 1.889 395.4						2.16	0.0015			3.8995 244.805 28.894 273.7						2.16	0			0.9810 761.551 761.6						1.08	0
2.168	10	2.168	0	2.168	0		2.168	9	2.168	0	2.168	0		1.084	2	1.084	0	1.084	0		6.3497 390.560 1.834 392.4						2.168	0.001			3.9139 243.780 28.276 272.1						2.168	0			0.9846 753.974 754.0						1.084	0
2.176	10	2.176	0	2.176	0		2.176	12	2.176	0	2.176	0		1.088	2	1.088	0	1.088	0		6.3730 387.667 1.780 389.4						2.176	0.001			3.9283 242.759 27.671 270.4						2.176	0			0.9882 746.472 746.5						1.088	0
2.184	9	2.184	0	2.184	0		2.184	10	2.184	0	2.184	0		1.092	3	1.092	0	1.092	0		6.3964 384.795 1.727 386.5						2.184	0.0009			3.9427 241.742 27.080 268.8						2.184	0			0.9918 739.044 739.0						1.092	0
2.192	9	2.192	0	2.192	0		2.192	14	2.192	0	2.192	0		1.096	3	1.096	0	1.096	0		6.4197 381.945 1.677 383.6						2.192	0.0009			3.9571 240.729 26.500 267.2						2.192	0			0.9955 731.690 731.7						1.096	0
2.2	11	2.2	0	2.2	0		2.2	16	2.2	0	2.2	0		1.1	4	1.1	0	1.1	0		6.4431 379.116 1.627 380.7						2.2	0.0011			3.9714 239.721 25.934 265.7						2.2	0			0.9991 724.410 724.4						1.1	0
2.208	10	2.208	0	2.208	0		2.208	12	2.208	0	2.208	0		1.104	4	1.104	0	1.104	0		6.4664 376.308 1.579 377.9						2.208	0.001			3.9858 238.717 25.379 264.1						2.208	0			1.0027 717.202 717.2						1.104	0
2.216	11	2.216	0	2.216	0		2.216	13	2.216	0	2.216	0		1.108	3	1.108	0	1.108	0		6.4897 373.521 1.533 375.1						2.216	0.0011			4.0002 237.717 24.836 262.6						2.216	0			1.0063 710.066 710.1						1.108	0
2.224	14	2.224	0	2.224	0		2.224	13	2.224	0	2.224	0		1.112	4	1.112	0	1.112	0		6.5131 370.754 1.488 372.2						2.224	0.0014			4.0146 236.722 24.305 261.0						2.224	0			1.0099 703.000 703.0						1.112	0
2.232	7	2.232	0	2.232	0		2.232	14	2.232	0	2.232	0		1.116	4	1.116	0	1.116	0		6.5364 368.008 1.444 369.5						2.232	0.0007			4.0290 235.730 23.786 259.5						2.232	0			1.0136 696.005 696.0						1.116	0
2.24	9	2.24	0	2.24	0		2.24	12	2.24	0	2.24	0		1.12	5	1.12	0	1.12	0		6.5598 365.282 1.402 366.7						2.24	0.0009			4.0434 234.743 23.277 258.0						2.24	0			1.0172 689.080 689.1						1.12	0
2.248	8	2.248	0	2.248	0		2.248	12	2.248	0	2.248	0		1.124	5	1.124	0	1.124	0		6.5831 362.576 1.360 363.9						2.248	0.0008			4.0578 233.759 22.779 256.5						2.248	0			1.0208 682.224 682.2						1.124	0
2.256	12	2.256	0	2.256	0		2.256	13	2.256	0	2.256	0		1.128	5	1.128	0	1.128	0		6.6065 359.890 1.320 361.2						2.256	0.0012			4.0722 232.780 22.292 255.1						2.256	0			1.0244 675.435 675.4						1.128	0
2.264	8	2.264	0	2.264	0		2.264	16	2.264	0	2.264	0		1.132	2	1.132	0	1.132	0		6.6298 357.225 1.282 358.5						2.264	0.0008			4.0866 231.805 21.815 253.6						2.264	0			1.0280 668.715 668.7						1.132	0
2.272	7	2.272	0	2.272	0		2.272	18	2.272	0	2.272	0		1.136	2	1.136	0	1.136	0		6.6532 354.579 1.244 355.8						2.272	0.0007			4.1010 230.834 21.349 252.2						2.272	0			1.0317 662.061 662.1						1.136	0
2.28	7	2.28	0	2.28	0		2.28	8	2.28	0	2.28	0		1.14	2	1.14	0	1.14	0		6.6765 351.952 1.207 353.2						2.28	0.0007			4.1153 229.867 20.892 250.8						2.28	0			1.0353 655.473 655.5						1.14	0
2.288	11	2.288	0	2.288	0		2.288	10	2.288	0	2.288	0		1.144	9	1.144	0	1.144	0		6.6998 349.345 1.172 350.5						2.288	0.0011			4.1297 228.905 20.445 249.4						2.288	0			1.0389 648.951 649.0						1.144	0
2.296	11	2.296	0	2.296	0		2.296	13	2.296	0	2.296	0		1.148	6	1.148	0	1.148	0		6.7232 346.758 1.137 347.9						2.296	0.0011			4.1441 227.946 20.008 248.0						2.296	0			1.0425 642.494 642.5						1.148	0
2.304	7	2.304	0	2.304	0		2.304	6	2.304	0	2.304	0		1.152	1	1.152	0	1.152	0		6.7465 344.189 1.104 345.3						2.304	0.0007			4.1585 226.991 19.580 246.6						2.304	0			1.0461 636.101 636.1						1.152	0
2.312	6	2.312	0	2.312	0		2.312	7	2.312	0	2.312	0		1.156	2	1.156	0	1.156	0		6.7699 341.640 1.072 342.7						2.312	0.0006			4.1729 226.040 19.162 245.2						2.312	0			1.0498 629.772 629.8						1.156	0
2.32	9	2.32	0	2.32	0		2.32	16	2.32	0	2.32	0		1.16	1	1.16	0	1.16	0		6.7932 339.109 1.040 340.1						2.32	0.0009			4.1873 225.094 18.752 243.8						2.32	0			1.0534 623.505 623.5						1.16	0
2.328	13	2.328	0	2.328	0		2.328	9	2.328	0	2.328	0		1.164	5	1.164	0	1.164	0		6.8166 336.598 1.009 337.6						2.328	0.0013			4.2017 224.151 18.351 242.5						2.328	0			1.0570 617.301 617.3						1.164	0
2.336	9	2.336	0	2.336	0		2.336	20	2.336	0	2.336	0		1.168	5	1.168	0	1.168	0		6.8399 334.104 0.980 335.1						2.336	0.0009			4.2161 223.212 17.958 241.2						2.336	0			1.0606 611.159 611.2						1.168	0
2.344	13	2.344	0	2.344	0		2.344	11	2.344	0	2.344	0		1.172	1	1.172	0	1.172	0		6.8633 331.630 0.951 332.6						2.344	0.0013			4.2305 222.277 17.574 239.9						2.344	0			1.0642 605.078 605.1						1.172	0
2.352	11	2.352	0	2.352	0		2.352	11	2.352	0	2.352	0		1.176	3	1.176	0	1.176	0		6.8866 329.173 0.923 330.1						2.352	0.0011			4.2448 221.346 17.199 238.5						2.352	0			1.0679 599.057 599.1						1.176	0
2.36	13	2.36	0	2.36	0		2.36	13	2.36	0	2.36	0		1.18	4	1.18	0	1.18	0		6.9099 326.735 0.896 327.6						2.36	0.0013			4.2592 220.419 16.831 237.2						2.36	0			1.0715 593.097 593.1						1.18	0
2.368	12	2.368	0	2.368	0		2.368	12	2.368	0	2.368	0		1.184	3	1.184	0	1.184	0		6.9333 324.315 0.870 325.2						2.368	0.0012			4.2736 219.496 16.471 236.0						2.368	0			1.0751 587.195 587.2						1.184	0
2.376	8	2.376	0	2.376	0		2.376	14	2.376	0	2.376	0		1.188	2	1.188	0	1.188	0		6.9566 321.913 0.844 322.8						2.376	0.0008			4.2880 218.576 16.119 234.7						2.376	0			1.0787 581.353 581.4						1.188	0
2.384	6	2.384	0	2.384	0		2.384	10	2.384	0	2.384	0		1.192	4	1.192	0	1.192	0		6.9800 319.528 0.819 320.3						2.384	0.0006			4.3024 217.661 15.774 233.4						2.384	0			1.0823 575.568 575.6						1.192	0
2.392	7	2.392	0	2.392	0		2.392	13	2.392	0	2.392	0		1.196	5	1.196	0	1.196	0		7.0033 317.161 0.795 318.0						2.392	0.0007			4.3168 216.749 15.437 232.2						2.392	0			1.0859 569.841 569.8						1.196	0
2.4	8	2.4	0	2.4	0		2.4	11	2.4	0	2.4	0		1.2	2	1.2	0	1.2	0		7.0267 314.812 0.772 315.6						2.4	0.0008			4.3312 215.841 15.106 230.9						2.4	0			1.0896 564.171 564.2						1.2	0
2.408	8	2.408	0	2.408	0		2.408	9	2.408	0	2.408	0		1.204	5	1.204	0	1.204	0		7.0500 312.480 0.749 313.2						2.408	0.0008			4.3456 214.937 14.783 229.7						2.408	0			1.0932 558.557 558.6						1.204	0
2.416	12	2.416	0	2.416	0		2.416	14	2.416	0	2.416	0		1.208	2	1.208	0	1.208	0		7.0734 310.166 0.727 310.9						2.416	0.0012			4.3600 214.037 14.467 228.5						2.416	0			1.0968 553.000 553.0						1.208	0
2.424	9	2.424	0	2.424	0		2.424	14	2.424	0	2.424	0		1.212	6	1.212	0	1.212	0		7.0967 307.868 0.706 308.6						2.424	0.0009			4.3744 213.140 14.158 227.3						2.424	0			1.1004 547.497 547.5						1.212	0
2.432	17	2.432	0	2.432	0		2.432	11	2.432	0	2.432	0		1.216	1	1.216	0	1.216	0		7.1200 305.588 0.685 306.3						2.432	0.0017			4.3887 212.248 13.855 226.1						2.432	0			1.1040 542.050 542.0						1.216	0
2.44	5	2.44	0	2.44	0		2.44	6	2.44	0	2.44	0		1.22	2	1.22	0	1.22	0		7.1434 303.324 0.665 304.0						2.44	0.0005			4.4031 211.359 13.559 224.9						2.44	0			1.1077 536.656 536.7						1.22	0
2.448	16	2.448	0	2.448	0		2.448	13	2.448	0	2.448	0		1.224	2	1.224	0	1.224	0		7.1667 301.078 0.645 301.7						2.448	0.0016			4.4175 210.473 13.269 223.7						2.448	0			1.1113 531.316 531.3						1.224	0
2.456	8	2.456	0	2.456	0		2.456	10	2.456	0	2.456	0		1.228	0	1.228	0	1.228	0		7.1901 298.848 0.626 299.5						2.456	0.0008			4.4319 209.592 12.985 222.6						2.456	0			1.1149 526.030 526.0						1.228	0
2.464	11	2.464	0	2.464	0		2.464	7	2.464	0	2.464	0		1.232	8	1.232	0	1.232	0		7.2134 296.634 0.608 297.2						2.464	0.0011			4.4463 208.714 12.707 221.4						2.464	0			1.1185 520.796 520.8						1.232	0
2.472	7	2.472	0	2.472	0		2.472	12	2.472	0	2.472	0		1.236	6	1.236	0	1.236	0		7.2368 294.437 0.590 295.0						2.472	0.0007			4.4607 207.840 12.436 220.3						2.472	0			1.1221 515.614 515.6						1.236	0
2.48	6	2.48	0	2.48	0		2.48	14	2.48	0	2.48	0		1.24	2	1.24	0	1.24	0		7.2601 292.256 0.573 292.8						2.48	0.0006			4.4751 206.969 12.170 219.1						2.48	0			1.1258 510.483 510.5						1.24	0
2.488	12	2.488	0	2.488	0		2.488	9	2.488	0	2.488	0		1.244	5	1.244	0	1.244	0		7.2835 290.091 0.556 290.6						2.488	0.0012			4.4895 206.102 11.909 218.0						2.488	0			1.1294 505.404 505.4						1.244	0
2.496	10	2.496	0	2.496	0		2.496	10	2.496	0	2.496	0		1.248	6	1.248	0	1.248	0		7.3068 287.942 0.539 288.5						2.496	0.001			4.5039 205.239 11.655 216.9						2.496	0			1.1330 500.375 500.4						1.248	0
2.504	16	2.504	0	2.504	0		2.504	11	2.504	0	2.504	0		1.252	1	1.252	0	1.252	0		7.3301 285.810 0.524 286.3						2.504	0.0016			4.5182 204.379 11.406 215.8						2.504	0			1.1366 495.396 495.4						1.252	0
2.512	8	2.512	0	2.512	0		2.512	15	2.512	0	2.512	0		1.256	4	1.256	0	1.256	0		7.3535 283.693 0.508 284.2						2.512	0.0008			4.5326 203.523 11.162 214.7						2.512	0			1.1402 490.467 490.5						1.256	0
2.52	11	2.52	0	2.52	0		2.52	14	2.52	0	2.52	0		1.26	5	1.26	0	1.26	0		7.3768 281.591 0.493 282.1						2.52	0.0011			4.5470 202.671 10.923 213.6						2.52	0			1.1439 485.587 485.6						1.26	0
2.528	10	2.528	0	2.528	0		2.528	16	2.528	0	2.528	0		1.264	2	1.264	0	1.264	0		7.4002 279.506 0.479 280.0						2.528	0.001			4.5614 201.822 10.689 212.5						2.528	0			1.1475 480.755 480.8						1.264	0
2.536	11	2.536	0	2.536	0		2.536	11	2.536	0	2.536	0		1.268	3	1.268	0	1.268	0		7.4235 277.435 0.465 277.9						2.536	0.0011			4.5758 200.976 10.461 211.4						2.536	0			1.1511 475.971 476.0						1.268	0
2.544	12	2.544	0	2.544	0		2.544	6	2.544	0	2.544	0		1.272	3	1.272	0	1.272	0		7.4469 275.380 0.451 275.8						2.544	0.0012			4.5902 200.135 10.237 210.4						2.544	0			1.1547 471.235 471.2						1.272	0
2.552	8	2.552	0	2.552	0		2.552	4	2.552	0	2.552	0		1.276	2	1.276	0	1.276	0		7.4702 273.340 0.438 273.8						2.552	0.0008			4.6046 199.296 10.018 209.3						2.552	0			1.1583 466.546 466.5						1.276	0
2.56	4	2.56	0	2.56	0		2.56	9	2.56	0	2.56	0		1.28	4	1.28	0	1.28	0		7.4936 271.316 0.425 271.7						2.56	0.0004			4.6190 198.462 9.804 208.3						2.56	0			1.1620 461.904 461.9						1.28	0
2.568	9	2.568	0	2.568	0		2.568	17	2.568	0	2.568	0		1.284	3	1.284	0	1.284	0		7.5169 269.306 0.412 269.7						2.568	0.0009			4.6334 197.630 9.594 207.2						2.568	0			1.1656 457.308 457.3						1.284	0
2.576	3	2.576	0	2.576	0		2.576	14	2.576	0	2.576	0		1.288	4	1.288	0	1.288	0		7.5402 267.311 0.400 267.7						2.576	0.0003			4.6477 196.803 9.389 206.2						2.576	0			1.1692 452.758 452.8						1.288	0
2.584	7	2.584	0	2.584	0		2.584	11	2.584	0	2.584	0		1.292	3	1.292	0	1.292	0		7.5636 265.331 0.388 265.7						2.584	0.0007			4.6621 195.978 9.188 205.2						2.584	0			1.1728 448.253 448.3						1.292	0
2.592	11	2.592	0	2.592	0		2.592	13	2.592	0	2.592	0		1.296	5	1.296	0	1.296	0		7.5869 263.366 0.377 263.7						2.592	0.0011			4.6765 195.157 8.992 204.1						2.592	0			1.1764 443.793 443.8						1.296	0
2.6	6	2.6	0	2.6	0		2.6	23	2.6	0	2.6	0		1.3	4	1.3	0	1.3	0		7.6103 261.415 0.366 261.8						2.6	0.0006			4.6909 194.340 8.800 203.1						2.6	0			1.1801 439.377 439.4						1.3	0
2.608	9	2.608	0	2.608	0		2.608	14	2.608	0	2.608	0		1.304	4	1.304	0	1.304	0		7.6336 259.479 0.355 259.8						2.608	0.0009			4.7053 193.526 8.611 202.1						2.608	0			1.1837 435.005 435.0						1.304	0
2.616	11	2.616	0	2.616	0		2.616	9	2.616	0	2.616	0		1.308	3	1.308	0	1.308	0		7.6570 257.557 0.345 257.9						2.616	0.0011			4.7197 192.715 8.427 201.1						2.616	0			1.1873 430.677 430.7						1.308	0
2.624	18	2.624	0	2.624	0		2.624	8	2.624	0	2.624	0		1.312	3	1.312	0	1.312	0		7.6803 255.649 0.335 256.0						2.624	0.0018			4.7341 191.908 8.247 200.2						2.624	0			1.1909 426.391 426.4						1.312	0
2.632	10	2.632	0	2.632	0		2.632	10	2.632	0	2.632	0		1.316	4	1.316	0	1.316	0		7.7037 253.756 0.325 254.1						2.632	0.001			4.7485 191.104 8.071 199.2						2.632	0			1.1945 422.149 422.1						1.316	0
2.64	10	2.64	0	2.64	0		2.64	12	2.64	0	2.64	0		1.32	3	1.32	0	1.32	0		7.7270 251.876 0.315 252.2						2.64	0.001			4.7629 190.304 7.898 198.2						2.64	0			1.1982 417.948 417.9						1.32	0
2.648	8	2.648	0	2.648	0		2.648	13	2.648	0	2.648	0		1.324	7	1.324	0	1.324	0		7.7503 250.010 0.306 250.3						2.648	0.0008			4.7773 189.507 7.729 197.2						2.648	0			1.2018 413.790 413.8						1.324	0
2.656	15	2.656	0	2.656	0		2.656	11	2.656	0	2.656	0		1.328	4	1.328	0	1.328	0		7.7737 248.159 0.297 248.5						2.656	0.0015			4.7916 188.713 7.564 196.3						2.656	0			1.2054 409.672 409.7						1.328	0
2.664	9	2.664	0	2.664	0		2.664	8	2.664	0	2.664	0		1.332	4	1.332	0	1.332	0		7.7970 246.320 0.288 246.6						2.664	0.0009			4.8060 187.923 7.402 195.3						2.664	0			1.2090 405.596 405.6						1.332	0
2.672	10	2.672	0	2.672	0		2.672	13	2.672	0	2.672	0		1.336	4	1.336	0	1.336	0		7.8204 244.496 0.280 244.8						2.672	0.001			4.8204 187.135 7.244 194.4						2.672	0			1.2126 401.560 401.6						1.336	0
2.68	11	2.68	0	2.68	0		2.68	10	2.68	0	2.68	0		1.34	3	1.34	0	1.34	0		7.8437 242.685 0.272 243.0						2.68	0.0011			4.8348 186.352 7.089 193.4						2.68	0			1.2163 397.565 397.6						1.34	0
2.688	6	2.688	0	2.688	0		2.688	18	2.688	0	2.688	0		1.344	4	1.344	0	1.344	0		7.8671 240.887 0.264 241.2						2.688	0.0006			4.8492 185.571 6.937 192.5						2.688	0			1.2199 393.609 393.6						1.344	0
2.696	10	2.696	0	2.696	0		2.696	11	2.696	0	2.696	0		1.348	3	1.348	0	1.348	0		7.8904 239.103 0.256 239.4						2.696	0.001			4.8636 184.794 6.789 191.6						2.696	0			1.2235 389.692 389.7						1.348	0
2.704	14	2.704	0	2.704	0		2.704	10	2.704	0	2.704	0		1.352	1	1.352	0	1.352	0		7.9138 237.332 0.248 237.6						2.704	0.0014			4.8780 184.020 6.644 190.7						2.704	0			1.2271 385.815 385.8						1.352	0
2.712	15	2.712	0	2.712	0		2.712	10	2.712	0	2.712	0		1.356	3	1.356	0	1.356	0		7.9371 235.574 0.241 235.8						2.712	0.0015			4.8924 183.249 6.502 189.8						2.712	0			1.2307 381.976 382.0						1.356	0
2.72	9	2.72	0	2.72	0		2.72	10	2.72	0	2.72	0		1.36	3	1.36	0	1.36	0		7.9604 233.829 0.234 234.1						2.72	0.0009			4.9068 182.481 6.363 188.8						2.72	0			1.2344 378.175 378.2						1.36	0
2.728	8	2.728	0	2.728	0		2.728	7	2.728	0	2.728	0		1.364	5	1.364	0	1.364	0		7.9838 232.097 0.227 232.3						2.728	0.0008			4.9211 181.717 6.227 187.9						2.728	0			1.2380 374.412 374.4						1.364	0
2.736	5	2.736	0	2.736	0		2.736	15	2.736	0	2.736	0		1.368	1	1.368	0	1.368	0		8.0071 230.378 0.220 230.6						2.736	0.0005			4.9355 180.956 6.093 187.0						2.736	0			1.2416 370.687 370.7						1.368	0
2.744	11	2.744	0	2.744	0		2.744	15	2.744	0	2.744	0		1.372	7	1.372	0	1.372	0		8.0305 228.672 0.214 228.9						2.744	0.0011			4.9499 180.198 5.963 186.2						2.744	0			1.2452 366.998 367.0						1.372	0
2.752	10	2.752	0	2.752	0		2.752	12	2.752	0	2.752	0		1.376	7	1.376	0	1.376	0		8.0538 226.978 0.208 227.2						2.752	0.001			4.9643 179.443 5.836 185.3						2.752	0			1.2488 363.347 363.3						1.376	0
2.76	11	2.76	0	2.76	0		2.76	14	2.76	0	2.76	0		1.38	2	1.38	0	1.38	0		8.0772 225.297 0.201 225.5						2.76	0.0011			4.9787 178.692 5.711 184.4						2.76	0			1.2525 359.731 359.7						1.38	0
2.768	10	2.768	0	2.768	0		2.768	10	2.768	0	2.768	0		1.384	2	1.384	0	1.384	0		8.1005 223.628 0.196 223.8						2.768	0.001			4.9931 177.943 5.589 183.5						2.768	0			1.2561 356.152 356.2						1.384	0
2.776	2	2.776	0	2.776	0		2.776	13	2.776	0	2.776	0		1.388	6	1.388	0	1.388	0		8.1239 221.971 0.190 222.2						2.776	0.0002			5.0075 177.198 5.469 182.7						2.776	0			1.2597 352.608 352.6						1.388	0
2.784	9	2.784	0	2.784	0		2.784	14	2.784	0	2.784	0		1.392	4	1.392	0	1.392	0		8.1472 220.327 0.184 220.5						2.784	0.0009			5.0219 176.456 5.352 181.8						2.784	0			1.2633 349.100 349.1						1.392	0
2.792	4	2.792	0	2.792	0		2.792	8	2.792	0	2.792	0		1.396	8	1.396	0	1.396	0		8.1705 218.695 0.179 218.9						2.792	0.0004			5.0363 175.717 5.238 181.0						2.792	0			1.2669 345.626 345.6						1.396	0
2.8	8	2.8	0	2.8	0		2.8	9	2.8	0	2.8	0		1.4	3	1.4	0	1.4	0		8.1939 217.075 0.174 217.2						2.8	0.0008			5.0506 174.981 5.126 180.1						2.8	0			1.2706 342.187 342.2						1.4	0
2.808	13	2.808	0	2.808	0		2.808	10	2.808	0	2.808	0		1.404	7	1.404	0	1.404	0		8.2172 215.467 0.168 215.6						2.808	0.0013			5.0650 174.248 5.016 179.3						2.808	0			1.2742 338.782 338.8						1.404	0
2.816	12	2.816	0	2.816	0		2.816	12	2.816	0	2.816	0		1.408	3	1.408	0	1.408	0		8.2406 213.871 0.163 214.0						2.816	0.0012			5.0794 173.518 4.909 178.4						2.816	0			1.2778 335.411 335.4						1.408	0
2.824	9	2.824	0	2.824	0		2.824	12	2.824	0	2.824	0		1.412	2	1.412	0	1.412	0		8.2639 212.287 0.159 212.4						2.824	0.0009			5.0938 172.791 4.804 177.6						2.824	0			1.2814 332.074 332.1						1.412	0
2.832	11	2.832	0	2.832	0		2.832	12	2.832	0	2.832	0		1.416	4	1.416	0	1.416	0		8.2873 210.715 0.154 210.9						2.832	0.0011			5.1082 172.067 4.701 176.8						2.832	0			1.2850 328.770 328.8						1.416	0
2.84	6	2.84	0	2.84	0		2.84	9	2.84	0	2.84	0		1.42	3	1.42	0	1.42	0		8.3106 209.154 0.149 209.3						2.84	0.0006			5.1226 171.347 4.601 175.9						2.84	0			1.2887 325.498 325.5						1.42	0
2.848	11	2.848	0	2.848	0		2.848	11	2.848	0	2.848	0		1.424	3	1.424	0	1.424	0		8.3340 207.605 0.145 207.7						2.848	0.0011			5.1370 170.629 4.502 175.1						2.848	0			1.2923 322.260 322.3						1.424	0
2.856	7	2.856	0	2.856	0		2.856	5	2.856	0	2.856	0		1.428	2	1.428	0	1.428	0		8.3573 206.067 0.141 206.2						2.856	0.0007			5.1514 169.914 4.406 174.3						2.856	0			1.2959 319.053 319.1						1.428	0
2.864	3	2.864	0	2.864	0		2.864	11	2.864	0	2.864	0		1.432	5	1.432	0	1.432	0		8.3806 204.541 0.137 204.7						2.864	0.0003			5.1658 169.202 4.312 173.5						2.864	0			1.2995 315.878 315.9						1.432	0
2.872	9	2.872	0	2.872	0		2.872	14	2.872	0	2.872	0		1.436	1	1.436	0	1.436	0		8.4040 203.026 0.133 203.2						2.872	0.0009			5.1802 168.494 4.220 172.7						2.872	0			1.3031 312.735 312.7						1.436	0
2.88	12	2.88	0	2.88	0		2.88	13	2.88	0	2.88	0		1.44	1	1.44	0	1.44	0		8.4273 201.522 0.129 201.7						2.88	0.0012			5.1945 167.788 4.129 171.9						2.88	0			1.3068 309.624 309.6						1.44	0
2.888	11	2.888	0	2.888	0		2.888	9	2.888	0	2.888	0		1.444	2	1.444	0	1.444	0		8.4507 200.029 0.125 200.2						2.888	0.0011			5.2089 167.085 4.041 171.1						2.888	0			1.3104 306.543 306.5						1.444	0
2.896	13	2.896	0	2.896	0		2.896	10	2.896	0	2.896	0		1.448	7	1.448	0	1.448	0		8.4740 198.548 0.121 198.7						2.896	0.0013			5.2233 166.385 3.955 170.3						2.896	0			1.3140 303.493 303.5						1.448	0
2.904	7	2.904	0	2.904	0		2.904	13	2.904	0	2.904	0		1.452	1	1.452	0	1.452	0		8.4974 197.077 0.118 197.2						2.904	0.0007			5.2377 165.688 3.870 169.6						2.904	0			1.3176 300.473 300.5						1.452	0
2.912	12	2.912	0	2.912	0		2.912	9	2.912	0	2.912	0		1.456	2	1.456	0	1.456	0		8.5207 195.617 0.114 195.7						2.912	0.0012			5.2521 164.994 3.787 168.8						2.912	0			1.3212 297.483 297.5						1.456	0
2.92	7	2.92	0	2.92	0		2.92	8	2.92	0	2.92	0		1.46	6	1.46	0	1.46	0		8.5441 194.168 0.111 194.3						2.92	0.0007			5.2665 164.303 3.706 168.0						2.92	0			1.3249 294.523 294.5						1.46	0
2.928	5	2.928	0	2.928	0		2.928	8	2.928	0	2.928	0		1.464	6	1.464	0	1.464	0		8.5674 192.730 0.108 192.8						2.928	0.0005			5.2809 163.615 3.627 167.2						2.928	0			1.3285 291.593 291.6						1.464	0
2.936	10	2.936	0	2.936	0		2.936	10	2.936	0	2.936	0		1.468	2	1.468	0	1.468	0		8.5907 191.302 0.104 191.4						2.936	0.001			5.2953 162.930 3.549 166.5						2.936	0			1.3321 288.691 288.7						1.468	0
2.944	5	2.944	0	2.944	0		2.944	11	2.944	0	2.944	0		1.472	2	1.472	0	1.472	0		8.6141 189.885 0.101 190.0						2.944	0.0005			5.3097 162.247 3.474 165.7						2.944	0			1.3357 285.819 285.8						1.472	0
2.952	13	2.952	0	2.952	0		2.952	11	2.952	0	2.952	0		1.476	5	1.476	0	1.476	0		8.6374 188.479 0.098 188.6						2.952	0.0013			5.3240 161.568 3.399 165.0						2.952	0			1.3393 282.975 283.0						1.476	0
2.96	9	2.96	0	2.96	0		2.96	14	2.96	0	2.96	0		1.48	6	1.48	0	1.48	0		8.6608 187.083 0.096 187.2						2.96	0.0009			5.3384 160.891 3.327 164.2						2.96	0			1.3430 280.159 280.2						1.48	0
2.968	10	2.968	0	2.968	0		2.968	14	2.968	0	2.968	0		1.484	3	1.484	0	1.484	0		8.6841 185.697 0.093 185.8						2.968	0.001			5.3528 160.217 3.255 163.5						2.968	0			1.3466 277.371 277.4						1.484	0
2.976	9	2.976	0	2.976	0		2.976	8	2.976	0	2.976	0		1.488	2	1.488	0	1.488	0		8.7075 184.322 0.090 184.4						2.976	0.0009			5.3672 159.546 3.186 162.7						2.976	0			1.3502 274.612 274.6						1.488	0
2.984	15	2.984	0	2.984	0		2.984	12	2.984	0	2.984	0		1.492	7	1.492	0	1.492	0		8.7308 182.956 0.087 183.0						2.984	0.0015			5.3816 158.878 3.118 162.0						2.984	0			1.3538 271.879 271.9						1.492	0
2.992	13	2.992	0	2.992	0		2.992	6	2.992	0	2.992	0		1.496	0	1.496	0	1.496	0		8.7542 181.601 0.085 181.7						2.992	0.0013			5.3960 158.212 3.051 161.3						2.992	0			1.3574 269.174 269.2						1.496	0
3	9	3	0	3	0		3	11	3	0	3	0		1.5	1	1.5	0	1.5	0		8.7775 180.256 0.082 180.3						3	0.0009			5.4104 157.550 2.986 160.5						3	0			1.3611 266.496 266.5						1.5	0
3.008	5	3.008	0	3.008	0		3.008	8	3.008	0	3.008	0		1.504	3	1.504	0	1.504	0		8.8008 178.921 0.080 179.0						3.008	0.0005			5.4248 156.890 2.922 159.8						3.008	0			1.3647 263.844 263.8						1.504	0
3.016	6	3.016	0	3.016	0		3.016	6	3.016	0	3.016	0		1.508	3	1.508	0	1.508	0		8.8242 177.596 0.078 177.7						3.016	0.0006			5.4392 156.233 2.859 159.1						3.016	0			1.3683 261.219 261.2						1.508	0
3.024	6	3.024	0	3.024	0		3.024	14	3.024	0	3.024	0		1.512	4	1.512	0	1.512	0		8.8475 176.280 0.075 176.4						3.024	0.0006			5.4535 155.578 2.798 158.4						3.024	0			1.3719 258.619 258.6						1.512	0
3.032	11	3.032	0	3.032	0		3.032	8	3.032	0	3.032	0		1.516	6	1.516	0	1.516	0		8.8709 174.974 0.073 175.0						3.032	0.0011			5.4679 154.927 2.738 157.7						3.032	0			1.3755 256.046 256.0						1.516	0
3.04	12	3.04	0	3.04	0		3.04	15	3.04	0	3.04	0		1.52	6	1.52	0	1.52	0		8.8942 173.678 0.071 173.7						3.04	0.0012			5.4823 154.278 2.680 157.0						3.04	0			1.3792 253.498 253.5						1.52	0
3.048	5	3.048	0	3.048	0		3.048	11	3.048	0	3.048	0		1.524	5	1.524	0	1.524	0		8.9176 172.392 0.069 172.5						3.048	0.0005			5.4967 153.631 2.623 156.3						3.048	0			1.3828 250.976 251.0						1.524	0
3.056	14	3.056	0	3.056	0		3.056	13	3.056	0	3.056	0		1.528	6	1.528	0	1.528	0		8.9409 171.115 0.067 171.2						3.056	0.0014			5.5111 152.988 2.566 155.6						3.056	0			1.3864 248.479 248.5						1.528	0
3.064	7	3.064	0	3.064	0		3.064	10	3.064	0	3.064	0		1.532	3	1.532	0	1.532	0		8.9643 169.848 0.065 169.9						3.064	0.0007			5.5255 152.347 2.512 154.9						3.064	0			1.3900 246.006 246.0						1.532	0
3.072	12	3.072	0	3.072	0		3.072	11	3.072	0	3.072	0		1.536	4	1.536	0	1.536	0		8.9876 168.590 0.063 168.7						3.072	0.0012			5.5399 151.709 2.458 154.2						3.072	0			1.3936 243.559 243.6						1.536	0
3.08	13	3.08	0	3.08	0		3.08	16	3.08	0	3.08	0		1.54	4	1.54	0	1.54	0		9.0109 167.341 0.061 167.4						3.08	0.0013			5.5543 151.074 2.405 153.5						3.08	0			1.3973 241.135 241.1						1.54	0
3.088	10	3.088	0	3.088	0		3.088	14	3.088	0	3.088	0		1.544	6	1.544	0	1.544	0		9.0343 166.101 0.059 166.2						3.088	0.001			5.5687 150.441 2.354 152.8						3.088	0			1.4009 238.736 238.7						1.544	0
3.096	13	3.096	0	3.096	0		3.096	13	3.096	0	3.096	0		1.548	5	1.548	0	1.548	0		9.0576 164.871 0.058 164.9						3.096	0.0013			5.5831 149.811 2.304 152.1						3.096	0			1.4045 236.360 236.4						1.548	0
3.104	10	3.104	0	3.104	0		3.104	9	3.104	0	3.104	0		1.552	2	1.552	0	1.552	0		9.0810 163.650 0.056 163.7						3.104	0.001			5.5974 149.183 2.254 151.4						3.104	0			1.4081 234.009 234.0						1.552	0
3.112	7	3.112	0	3.112	0		3.112	6	3.112	0	3.112	0		1.556	2	1.556	0	1.556	0		9.1043 162.438 0.054 162.5						3.112	0.0007			5.6118 148.558 2.206 150.8						3.112	0			1.4117 231.680 231.7						1.556	0
3.12	11	3.12	0	3.12	0		3.12	11	3.12	0	3.12	0		1.56	5	1.56	0	1.56	0		9.1277 161.234 0.053 161.3						3.12	0.0011			5.6262 147.936 2.159 150.1						3.12	0			1.4154 229.375 229.4						1.56	0
3.128	16	3.128	0	3.128	0		3.128	15	3.128	0	3.128	0		1.564	6	1.564	0	1.564	0		9.1510 160.040 0.051 160.1						3.128	0.0016			5.6406 147.316 2.113 149.4						3.128	0			1.4190 227.093 227.1						1.564	0
3.136	13	3.136	0	3.136	0		3.136	14	3.136	0	3.136	0		1.568	5	1.568	0	1.568	0		9.1744 158.855 0.050 158.9						3.136	0.0013			5.6550 146.699 2.068 148.8						3.136	0			1.4226 224.833 224.8						1.568	0
3.144	7	3.144	0	3.144	0		3.144	11	3.144	0	3.144	0		1.572	0	1.572	0	1.572	0		9.1977 157.678 0.048 157.7						3.144	0.0007			5.6694 146.085 2.023 148.1						3.144	0			1.4262 222.596 222.6						1.572	0
3.152	13	3.152	0	3.152	0		3.152	14	3.152	0	3.152	0		1.576	4	1.576	0	1.576	0		9.2210 156.510 0.047 156.6						3.152	0.0013			5.6838 145.473 1.980 147.5						3.152	0			1.4298 220.381 220.4						1.576	0
3.16	8	3.16	0	3.16	0		3.16	11	3.16	0	3.16	0		1.58	3	1.58	0	1.58	0		9.2444 155.351 0.045 155.4						3.16	0.0008			5.6982 144.864 1.938 146.8						3.16	0			1.4335 218.188 218.2						1.58	0
3.168	10	3.168	0	3.168	0		3.168	9	3.168	0	3.168	0		1.584	2	1.584	0	1.584	0		9.2677 154.200 0.044 154.2						3.168	0.001			5.7126 144.257 1.896 146.2						3.168	0			1.4371 216.017 216.0						1.584	0
3.176	8	3.176	0	3.176	0		3.176	12	3.176	0	3.176	0		1.588	3	1.588	0	1.588	0		9.2911 153.058 0.043 153.1						3.176	0.0008			5.7269 143.653 1.856 145.5						3.176	0			1.4407 213.868 213.9						1.588	0
3.184	9	3.184	0	3.184	0		3.184	12	3.184	0	3.184	0		1.592	3	1.592	0	1.592	0		9.3144 151.924 0.041 152.0						3.184	0.0009			5.7413 143.051 1.816 144.9						3.184	0			1.4443 211.740 211.7						1.592	0
3.192	14	3.192	0	3.192	0		3.192	7	3.192	0	3.192	0		1.596	5	1.596	0	1.596	0		9.3378 150.799 0.040 150.8						3.192	0.0014			5.7557 142.452 1.777 144.2						3.192	0			1.4479 209.633 209.6						1.596	0
3.2	10	3.2	0	3.2	0		3.2	13	3.2	0	3.2	0		1.6	6	1.6	0	1.6	0		9.3611 149.682 0.039 149.7						3.2	0.001			5.7701 141.855 1.739 143.6						3.2	0			1.4516 207.547 207.5						1.6	0
3.208	14	3.208	0	3.208	0		3.208	12	3.208	0	3.208	0		1.604	3	1.604	0	1.604	0		9.3845 148.573 0.038 148.6						3.208	0.0014			5.7845 141.261 1.702 143.0						3.208	0			1.4552 205.482 205.5						1.604	0
3.216	12	3.216	0	3.216	0		3.216	16	3.216	0	3.216	0		1.608	4	1.608	0	1.608	0		9.4078 147.473 0.037 147.5						3.216	0.0012			5.7989 140.669 1.666 142.3						3.216	0			1.4588 203.437 203.4						1.608	0
3.224	11	3.224	0	3.224	0		3.224	9	3.224	0	3.224	0		1.612	4	1.612	0	1.612	0		9.4311 146.380 0.036 146.4						3.224	0.0011			5.8133 140.080 1.630 141.7						3.224	0			1.4624 201.413 201.4						1.612	0
3.232	9	3.232	0	3.232	0		3.232	5	3.232	0	3.232	0		1.616	3	1.616	0	1.616	0		9.4545 145.296 0.035 145.3						3.232	0.0009			5.8277 139.493 1.595 141.1						3.232	0			1.4660 199.409 199.4						1.616	0
3.24	9	3.24	0	3.24	0		3.24	9	3.24	0	3.24	0		1.62	6	1.62	0	1.62	0		9.4778 144.220 0.034 144.3						3.24	0.0009			5.8421 138.909 1.561 140.5						3.24	0			1.4697 197.425 197.4						1.62	0
3.248	8	3.248	0	3.248	0		3.248	11	3.248	0	3.248	0		1.624	3	1.624	0	1.624	0		9.5012 143.152 0.033 143.2						3.248	0.0008			5.8564 138.327 1.528 139.9						3.248	0			1.4733 195.460 195.5						1.624	0
3.256	8	3.256	0	3.256	0		3.256	17	3.256	0	3.256	0		1.628	6	1.628	0	1.628	0		9.5245 142.091 0.032 142.1						3.256	0.0008			5.8708 137.748 1.495 139.2						3.256	0			1.4769 193.515 193.5						1.628	0
3.264	14	3.264	0	3.264	0		3.264	7	3.264	0	3.264	0		1.632	4	1.632	0	1.632	0		9.5479 141.039 0.031 141.1						3.264	0.0014			5.8852 137.171 1.463 138.6						3.264	0			1.4805 191.590 191.6						1.632	0
3.272	6	3.272	0	3.272	0		3.272	10	3.272	0	3.272	0		1.636	5	1.636	0	1.636	0		9.5712 139.994 0.030 140.0						3.272	0.0006			5.8996 136.596 1.432 138.0						3.272	0			1.4841 189.684 189.7						1.636	0
3.28	9	3.28	0	3.28	0		3.28	14	3.28	0	3.28	0		1.64	2	1.64	0	1.64	0		9.5946 138.957 0.029 139.0						3.28	0.0009			5.9140 136.024 1.401 137.4						3.28	0			1.4878 187.796 187.8						1.64	0
3.288	13	3.288	0	3.288	0		3.288	7	3.288	0	3.288	0		1.644	5	1.644	0	1.644	0		9.6179 137.928 0.028 138.0						3.288	0.0013			5.9284 135.455 1.371 136.8						3.288	0			1.4914 185.928 185.9						1.644	0
3.296	11	3.296	0	3.296	0		3.296	8	3.296	0	3.296	0		1.648	1	1.648	0	1.648	0		9.6412 136.906 0.027 136.9						3.296	0.0011			5.9428 134.887 1.342 136.2						3.296	0			1.4950 184.078 184.1						1.648	0
3.304	11	3.304	0	3.304	0		3.304	14	3.304	0	3.304	0		1.652	2	1.652	0	1.652	0		9.6646 135.892 0.026 135.9						3.304	0.0011			5.9572 134.322 1.313 135.6						3.304	0			1.4986 182.246 182.2						1.652	0
3.312	11	3.312	0	3.312	0		3.312	8	3.312	0	3.312	0		1.656	6	1.656	0	1.656	0		9.6879 134.886 0.026 134.9						3.312	0.0011			5.9716 133.760 1.285 135.0						3.312	0			1.5022 180.433 180.4						1.656	0
3.32	15	3.32	0	3.32	0		3.32	16	3.32	0	3.32	0		1.66	6	1.66	0	1.66	0		9.7113 133.887 0.025 133.9						3.32	0.0015			5.9860 133.199 1.258 134.5						3.32	0			1.5058 178.637 178.6						1.66	0
3.328	8	3.328	0	3.328	0		3.328	10	3.328	0	3.328	0		1.664	4	1.664	0	1.664	0		9.7346 132.895 0.024 132.9						3.328	0.0008			6.0003 132.641 1.231 133.9						3.328	0			1.5095 176.860 176.9						1.664	0
3.336	10	3.336	0	3.336	0		3.336	13	3.336	0	3.336	0		1.668	4	1.668	0	1.668	0		9.7580 131.911 0.023 131.9						3.336	0.001			6.0147 132.086 1.204 133.3						3.336	0			1.5131 175.100 175.1						1.668	0
3.344	12	3.344	0	3.344	0		3.344	12	3.344	0	3.344	0		1.672	1	1.672	0	1.672	0		9.7813 130.933 0.023 131.0						3.344	0.0012			6.0291 131.533 1.179 132.7						3.344	0			1.5167 173.358 173.4						1.672	0
3.352	15	3.352	0	3.352	0		3.352	8	3.352	0	3.352	0		1.676	4	1.676	0	1.676	0		9.8047 129.964 0.022 130.0						3.352	0.0015			6.0435 130.982 1.153 132.1						3.352	0			1.5203 171.633 171.6						1.676	0
3.36	17	3.36	0	3.36	0		3.36	14	3.36	0	3.36	0		1.68	3	1.68	0	1.68	0		9.8280 129.001 0.021 129.0						3.36	0.0017			6.0579 130.433 1.129 131.6						3.36	0			1.5239 169.925 169.9						1.68	0
3.368	10	3.368	0	3.368	0		3.368	12	3.368	0	3.368	0		1.684	2	1.684	0	1.684	0		9.8513 128.045 0.021 128.1						3.368	0.001			6.0723 129.887 1.105 131.0						3.368	0			1.5276 168.234 168.2						1.684	0
3.376	14	3.376	0	3.376	0		3.376	8	3.376	0	3.376	0		1.688	6	1.688	0	1.688	0		9.8747 127.097 0.020 127.1						3.376	0.0014			6.0867 129.343 1.081 130.4						3.376	0			1.5312 166.560 166.6						1.688	0
3.384	11	3.384	0	3.384	0		3.384	10	3.384	0	3.384	0		1.692	5	1.692	0	1.692	0		9.8980 126.156 0.020 126.2						3.384	0.0011			6.1011 128.801 1.058 129.9						3.384	0			1.5348 164.903 164.9						1.692	0
3.392	14	3.392	0	3.392	0		3.392	10	3.392	0	3.392	0		1.696	4	1.696	0	1.696	0		9.9214 125.221 0.019 125.2						3.392	0.0014			6.1155 128.261 1.035 129.3						3.392	0			1.5384 163.262 163.3						1.696	0
3.4	7	3.4	0	3.4	0		3.4	14	3.4	0	3.4	0		1.7	6	1.7	0	1.7	0		9.9447 124.294 0.019 124.3						3.4	0.0007			6.1298 127.724 1.013 128.7						3.4	0			1.5420 161.638 161.6						1.7	0
3.408	15	3.408	0	3.408	0		3.408	10	3.408	0	3.408	0		1.704	1	1.704	0	1.704	0		9.9681 123.373 0.018 123.4						3.408	0.0015			6.1442 127.189 0.991 128.2						3.408	0			1.5457 160.029 160.0						1.704	0
3.416	17	3.416	0	3.416	0		3.416	9	3.416	0	3.416	0		1.708	1	1.708	0	1.708	0		9.9914 122.459 0.017 122.5						3.416	0.0017			6.1586 126.656 0.970 127.6						3.416	0			1.5493 158.437 158.4						1.708	0
3.424	15	3.424	0	3.424	0		3.424	8	3.424	0	3.424	0		1.712	5	1.712	0	1.712	0		10.0148 121.552 0.017 121.6						3.424	0.0015			6.1730 126.126 0.949 127.1						3.424	0			1.5529 156.861 156.9						1.712	0
3.432	15	3.432	0	3.432	0		3.432	11	3.432	0	3.432	0		1.716	3	1.716	0	1.716	0		10.0381 120.652 0.016 120.7						3.432	0.0015			6.1874 125.598 0.929 126.5						3.432	0			1.5565 155.300 155.3						1.716	0
3.44	15	3.44	0	3.44	0		3.44	8	3.44	0	3.44	0		1.72	1	1.72	0	1.72	0		10.0614 119.758 0.016 119.8						3.44	0.0015			6.2018 125.072 0.909 126.0						3.44	0			1.5601 153.755 153.8						1.72	0
3.448	20	3.448	0	3.448	0		3.448	7	3.448	0	3.448	0		1.724	3	1.724	0	1.724	0		10.0848 118.871 0.015 118.9						3.448	0.002			6.2162 124.548 0.890 125.4						3.448	0			1.5638 152.225 152.2						1.724	0
3.456	12	3.456	0	3.456	0		3.456	13	3.456	0	3.456	0		1.728	7	1.728	0	1.728	0		10.1081 117.991 0.015 118.0						3.456	0.0012			6.2306 124.026 0.871 124.9						3.456	0			1.5674 150.710 150.7						1.728	0
3.464	18	3.464	0	3.464	0		3.464	11	3.464	0	3.464	0		1.732	3	1.732	0	1.732	0		10.1315 117.117 0.015 117.1						3.464	0.0018			6.2450 123.507 0.852 124.4						3.464	0			1.5710 149.210 149.2						1.732	0
3.472	21	3.472	0	3.472	0		3.472	12	3.472	0	3.472	0		1.736	3	1.736	0	1.736	0		10.1548 116.249 0.014 116.3						3.472	0.0021			6.2594 122.989 0.834 123.8						3.472	0			1.5746 147.726 147.7						1.736	0
3.48	22	3.48	0	3.48	0		3.48	13	3.48	0	3.48	0		1.74	6	1.74	0	1.74	0		10.1782 115.388 0.014 115.4						3.48	0.0022			6.2737 122.474 0.816 123.3						3.48	0			1.5782 146.256 146.3						1.74	0
3.488	22	3.488	0	3.488	0		3.488	11	3.488	0	3.488	0		1.744	1	1.744	0	1.744	0		10.2015 114.533 0.013 114.5						3.488	0.0022			6.2881 121.961 0.799 122.8						3.488	0			1.5819 144.801 144.8						1.744	0
3.496	20	3.496	0	3.496	0		3.496	12	3.496	0	3.496	0		1.748	2	1.748	0	1.748	0		10.2249 113.685 0.013 113.7						3.496	0.002			6.3025 121.450 0.782 122.2						3.496	0			1.5855 143.360 143.4						1.748	0
3.504	27	3.504	0	3.504	0		3.504	12	3.504	0	3.504	0		1.752	7	1.752	0	1.752	0		10.2482 112.843 0.013 112.9						3.504	0.0027			6.3169 120.942 0.765 121.7						3.504	0			1.5891 141.933 141.9						1.752	0
3.512	41	3.512	0	3.512	0		3.512	9	3.512	0	3.512	0		1.756	4	1.756	0	1.756	0		10.2715 112.007 0.012 112.0						3.512	0.0041			6.3313 120.435 0.749 121.2						3.512	0			1.5927 140.521 140.5						1.756	0
3.52	42	3.52	0	3.52	0		3.52	7	3.52	0	3.52	0		1.76	6	1.76	0	1.76	0		10.2949 111.177 0.012 111.2						3.52	0.0042			6.3457 119.931 0.733 120.7						3.52	0			1.5963 139.123 139.1						1.76	0
3.528	43	3.528	0	3.528	0		3.528	11	3.528	0	3.528	0		1.764	1	1.764	0	1.764	0		10.3182 110.354 0.011 110.4						3.528	0.0043			6.3601 119.428 0.717 120.1						3.528	0			1.6000 137.739 137.7						1.764	0
3.536	46	3.536	0	3.536	0		3.536	13	3.536	0	3.536	0		1.768	3	1.768	0	1.768	0		10.3416 109.537 0.011 109.5						3.536	0.0046			6.3745 118.928 0.702 119.6						3.536	0			1.6036 136.368 136.4						1.768	0
3.544	63	3.544	0	3.544	0		3.544	15	3.544	0	3.544	0		1.772	4	1.772	0	1.772	0		10.3649 108.725 0.011 108.7						3.544	0.0063			6.3889 118.430 0.687 119.1						3.544	0			1.6072 135.011 135.0						1.772	0
3.552	77	3.552	0	3.552	0		3.552	13	3.552	0	3.552	0		1.776	3	1.776	0	1.776	0		10.3883 107.920 0.010 107.9						3.552	0.0077			6.4032 117.934 0.672 118.6						3.552	0			1.6108 133.668 133.7						1.776	0
3.56	87	3.56	0	3.56	0		3.56	18	3.56	0	3.56	0		1.78	3	1.78	0	1.78	0		10.4116 107.120 0.010 107.1						3.56	0.0087			6.4176 117.440 0.657 118.1						3.56	0			1.6144 132.338 132.3						1.78	0
3.568	103	3.568	0	3.568	0		3.568	9	3.568	0	3.568	0		1.784	3	1.784	0	1.784	0		10.4349 106.327 0.010 106.3						3.568	0.0103			6.4320 116.948 0.643 117.6						3.568	0			1.6181 131.021 131.0						1.784	0
3.576	116	3.576	0	3.576	0		3.576	12	3.576	0	3.576	0		1.788	0	1.788	0	1.788	0		10.4583 105.539 0.010 105.5						3.576	0.0116			6.4464 116.458 0.630 117.1						3.576	0			1.6217 129.717 129.7						1.788	0
3.584	136	3.584	0	3.584	0		3.584	15	3.584	0	3.584	0		1.792	6	1.792	0	1.792	0		10.4816 104.758 0.009 104.8						3.584	0.0136			6.4608 115.970 0.616 116.6						3.584	0			1.6253 128.427 128.4						1.792	0
3.592	178	3.592	0	3.592	0		3.592	7	3.592	0	3.592	0		1.796	6	1.796	0	1.796	0		10.5050 103.982 0.009 104.0						3.592	0.0178			6.4752 115.485 0.603 116.1						3.592	0			1.6289 127.149 127.1						1.796	0
3.6	203	3.6	0	3.6	0		3.6	8	3.6	0	3.6	0		1.8	7	1.8	0	1.8	0		10.5283 103.212 0.009 103.2						3.6	0.0203			6.4896 115.001 0.590 115.6						3.6	0			1.6325 125.884 125.9						1.8	0
3.608	252	3.608	0	3.608	0		3.608	17	3.608	0	3.608	0		1.804	3	1.804	0	1.804	0		10.5517 102.447 0.009 102.5						3.608	0.0252			6.5040 114.519 0.577 115.1						3.608	0			1.6362 124.631 124.6						1.804	0
3.616	314	3.616	0	3.616	0		3.616	10	3.616	0	3.616	0		1.808	6	1.808	0	1.808	0		10.5750 101.688 0.008 101.7						3.616	0.0314			6.5184 114.039 0.565 114.6						3.616	0			1.6398 123.391 123.4						1.808	0
3.624	364	3.624	0	3.624	0		3.624	16	3.624	0	3.624	0		1.812	4	1.812	0	1.812	0		10.5984 100.935 0.008 100.9						3.624	0.0364			6.5327 113.562 0.553 114.1						3.624	0			1.6434 122.163 122.2						1.812	0
3.632	503	3.632	0	3.632	0		3.632	8	3.632	0	3.632	0		1.816	4	1.816	0	1.816	0		10.6217 100.187 0.008 100.2						3.632	0.0503			6.5471 113.086 0.541 113.6						3.632	0			1.6470 120.948 120.9						1.816	0
3.64	619	3.64	0	3.64	0		3.64	15	3.64	0	3.64	0		1.82	6	1.82	0	1.82	0		10.6450 99.445 0.008 99.5						3.64	0.0619			6.5615 112.612 0.530 113.1						3.64	0			1.6506 119.744 119.7						1.82	0
3.648	696	3.648	0	3.648	0		3.648	13	3.648	0	3.648	0		1.824	5	1.824	0	1.824	0		10.6684 98.709 0.007 98.7						3.648	0.0696			6.5759 112.141 0.518 112.7						3.648	0			1.6543 118.553 118.6						1.824	0
3.656	817	3.656	0	3.656	0		3.656	14	3.656	0	3.656	0		1.828	4	1.828	0	1.828	0		10.6917 97.978 0.007 98.0						3.656	0.0817			6.5903 111.671 0.507 112.2						3.656	0			1.6579 117.373 117.4						1.828	0
3.664	1033	3.664	0	3.664	0		3.664	10	3.664	0	3.664	0		1.832	2	1.832	0	1.832	0		10.7151 97.252 0.007 97.3						3.664	0.1033			6.6047 111.203 0.496 111.7						3.664	0			1.6615 116.205 116.2						1.832	0
3.672	1216	3.672	0	3.672	0		3.672	17	3.672	0	3.672	0		1.836	1	1.836	0	1.836	0		10.7384 96.531 0.007 96.5						3.672	0.1216			6.6191 110.738 0.486 111.2						3.672	0			1.6651 115.049 115.0						1.836	0
3.68	1453	3.68	0	3.68	0		3.68	20	3.68	0	3.68	0		1.84	4	1.84	0	1.84	0		10.7618 95.816 0.007 95.8						3.68	0.1453			6.6335 110.274 0.475 110.7						3.68	0			1.6687 113.904 113.9						1.84	0
3.688	1719	3.688	0	3.688	0		3.688	18	3.688	0	3.688	0		1.844	3	1.844	0	1.844	0		10.7851 95.107 0.006 95.1						3.688	0.1719			6.6479 109.812 0.465 110.3						3.688	0			1.6724 112.771 112.8						1.844	0
3.696	2016	3.696	0	3.696	0		3.696	19	3.696	0	3.696	0		1.848	3	1.848	0	1.848	0		10.8085 94.402 0.006 94.4						3.696	0.2016			6.6623 109.352 0.455 109.8						3.696	0			1.6760 111.649 111.6						1.848	0
3.704	2354	3.704	0	3.704	0		3.704	14	3.704	0	3.704	0		1.852	2	1.852	0	1.852	0		10.8318 93.703 0.006 93.7						3.704	0.2354			6.6766 108.894 0.446 109.3						3.704	0			1.6796 110.538 110.5						1.852	0
3.712	2607	3.712	0	3.712	0		3.712	18	3.712	0	3.712	0		1.856	1	1.856	0	1.856	0		10.8551 93.009 0.006 93.0						3.712	0.2607			6.6910 108.438 0.436 108.9						3.712	0			1.6832 109.438 109.4						1.856	0
3.72	3099	3.72	0	3.72	0		3.72	15	3.72	0	3.72	0		1.86	4	1.86	0	1.86	0		10.8785 92.320 0.006 92.3						3.72	0.3099			6.7054 107.984 0.427 108.4						3.72	0			1.6868 108.349 108.3						1.86	0
3.728	3452	3.728	0	3.728	0		3.728	10	3.728	0	3.728	0		1.864	3	1.864	0	1.864	0		10.9018 91.636 0.005 91.6						3.728	0.3452			6.7198 107.531 0.418 107.9						3.728	0			1.6905 107.271 107.3						1.864	0
3.736	3748	3.736	0	3.736	0		3.736	12	3.736	0	3.736	0		1.868	4	1.868	0	1.868	0		10.9252 90.957 0.005 91.0						3.736	0.3748			6.7342 107.081 0.409 107.5						3.736	0			1.6941 106.204 106.2						1.868	0
3.744	4268	3.744	0	3.744	0		3.744	11	3.744	0	3.744	0		1.872	7	1.872	0	1.872	0		10.9485 90.284 0.005 90.3						3.744	0.4268			6.7486 106.632 0.400 107.0						3.744	0			1.6977 105.147 105.1						1.872	0
3.752	4677	3.752	0	3.752	0		3.752	26	3.752	0	3.752	0		1.876	4	1.876	0	1.876	0		10.9719 89.615 0.005 89.6						3.752	0.4677			6.7630 106.186 0.391 106.6						3.752	0			1.7013 104.101 104.1						1.876	0
3.76	5243	3.76	0	3.76	0		3.76	14	3.76	0	3.76	0		1.88	4	1.88	0	1.88	0		10.9952 88.951 0.005 89.0						3.76	0.5243			6.7774 105.741 0.383 106.1						3.76	0			1.7049 103.065 103.1						1.88	0
3.768	5601	3.768	0	3.768	0		3.768	24	3.768	0	3.768	0		1.884	5	1.884	0	1.884	0		11.0186 88.292 0.005 88.3						3.768	0.5601			6.7918 105.298 0.375 105.7						3.768	0			1.7086 102.039 102.0						1.884	0
3.776	6153	3.776	0	3.776	0		3.776	18	3.776	0	3.776	0		1.888	5	1.888	0	1.888	0		11.0419 87.638 0.005 87.6						3.776	0.6153			6.8061 104.857 0.367 105.2						3.776	0			1.7122 101.024 101.0						1.888	0
3.784	6625	3.784	0	3.784	0		3.784	24	3.784	0	3.784	0		1.892	2	1.892	0	1.892	0		11.0652 86.989 0.004 87.0						3.784	0.6625			6.8205 104.418 0.359 104.8						3.784	0			1.7158 100.019 100.0						1.892	0
3.792	6917	3.792	0	3.792	0		3.792	16	3.792	0	3.792	0		1.896	6	1.896	0	1.896	0		11.0886 86.345 0.004 86.3						3.792	0.6917			6.8349 103.980 0.351 104.3						3.792	0			1.7194 99.024 99.0						1.896	0
3.8	7464	3.8	0	3.8	0		3.8	33	3.8	0	3.8	0		1.9	1	1.9	0	1.9	0		11.1119 85.705 0.004 85.7						3.8	0.7464			6.8493 103.545 0.344 103.9						3.8	0			1.7230 98.038 98.0						1.9	0
3.808	7697	3.808	0	3.808	0		3.808	39	3.808	0	3.808	0		1.904	3	1.904	0	1.904	0		11.1353 85.071 0.004 85.1						3.808	0.7697			6.8637 103.111 0.336 103.4						3.808	0			1.7267 97.063 97.1						1.904	0
3.816	8236	3.816	0	3.816	0		3.816	44	3.816	0	3.816	0		1.908	2	1.908	0	1.908	0		11.1586 84.440 0.004 84.4						3.816	0.8236			6.8781 102.679 0.329 103.0						3.816	0			1.7303 96.097 96.1						1.908	0
3.824	8295	3.824	0	3.824	0		3.824	60	3.824	0	3.824	0		1.912	2	1.912	0	1.912	0		11.1820 83.815 0.004 83.8						3.824	0.8295			6.8925 102.249 0.322 102.6						3.824	0			1.7339 95.141 95.1						1.912	0
3.832	8855	3.832	0	3.832	0		3.832	67	3.832	0	3.832	0		1.916	3	1.916	0	1.916	0		11.2053 83.194 0.004 83.2						3.832	0.8855			6.9069 101.821 0.315 102.1						3.832	0			1.7375 94.194 94.2						1.916	0
3.84	9059	3.84	0	3.84	0		3.84	79	3.84	0	3.84	0		1.92	5	1.92	0	1.92	0		11.2287 82.578 0.004 82.6						3.84	0.9059			6.9213 101.394 0.309 101.7						3.84	0			1.7411 93.257 93.3						1.92	0
3.848	9144	3.848	0	3.848	0		3.848	101	3.848	0	3.848	0		1.924	1	1.924	0	1.924	0		11.2520 81.966 0.003 82.0						3.848	0.9144			6.9356 100.970 0.302 101.3						3.848	0			1.7448 92.329 92.3						1.924	0
3.856	9506	3.856	0	3.856	0		3.856	132	3.856	0	3.856	0		1.928	2	1.928	0	1.928	0		11.2753 81.359 0.003 81.4						3.856	0.9506			6.9500 100.547 0.295 100.8						3.856	0			1.7484 91.410 91.4						1.928	0
3.864	9503	3.864	0	3.864	0		3.864	163	3.864	0	3.864	0		1.932	4	1.932	0	1.932	0		11.2987 80.756 0.003 80.8						3.864	0.9503			6.9644 100.126 0.289 100.4						3.864	0			1.7520 90.501 90.5						1.932	0
3.872	9640	3.872	0	3.872	0		3.872	191	3.872	0	3.872	0		1.936	3	1.936	0	1.936	0		11.3220 80.158 0.003 80.2						3.872	0.964			6.9788 99.706 0.283 100.0						3.872	0			1.7556 89.600 89.6						1.936	0
3.88	9662	3.88	0	3.88	0		3.88	230	3.88	0	3.88	0		1.94	5	1.94	0	1.94	0		11.3454 79.565 0.003 79.6						3.88	0.9662			6.9932 99.289 0.277 99.6						3.88	0			1.7592 88.709 88.7						1.94	0
3.888	9859	3.888	0	3.888	0		3.888	299	3.888	0	3.888	0		1.944	4	1.944	0	1.944	0		11.3687 78.975 0.003 79.0						3.888	0.9859			7.0076 98.873 0.271 99.1						3.888	0			1.7629 87.826 87.8						1.944	0
3.896	9824	3.896	0	3.896	0		3.896	383	3.896	0	3.896	0		1.948	3	1.948	0	1.948	0		11.3921 78.390 0.003 78.4						3.896	0.9824			7.0220 98.459 0.265 98.7						3.896	0			1.7665 86.952 87.0						1.948	0
3.904	9844	3.904	9110.36	3.904	7.394		3.904	471	3.904	0	3.904	0		1.952	7	1.952	0	1.952	0		11.4154 77.810 0.003 77.8						3.904	0.9844			7.0364 98.046 0.260 98.3						3.904	0			1.7701 86.087 86.1						1.952	0
3.912	9786	3.912	9040.31	3.912	7.538		3.912	577	3.912	0	3.912	0		1.956	2	1.956	0	1.956	0		11.4388 77.233 0.003 77.2						3.912	0.9786			7.0508 97.636 0.254 97.9						3.912	0			1.7737 85.230 85.2						1.956	0
3.92	10000	3.92	8970.92	3.92	10.291		3.92	657	3.92	0	3.92	0		1.96	4	1.96	0	1.96	0		11.4621 76.661 0.003 76.7						3.92	1			7.0652 97.227 0.249 97.5						3.92	0			1.7773 84.382 84.4						1.96	0
3.928	9540	3.928	8902.17	3.928	6.53		3.928	897	3.928	0	3.928	0		1.964	3	1.964	0	1.964	0		11.4854 76.093 0.003 76.1						3.928	0.954			7.0795 96.819 0.243 97.1						3.928	0			1.7810 83.543 83.5						1.964	0
3.936	9635	3.936	8834.07	3.936	8.16		3.936	1074	3.936	0	3.936	0		1.968	2	1.968	0	1.968	0		11.5088 75.530 0.003 75.5						3.936	0.9635			7.0939 96.414 0.238 96.7						3.936	0			1.7846 82.711 82.7						1.968	0
3.944	9570	3.944	8766.6	3.944	8.213		3.944	1231	3.944	0	3.944	0		1.972	4	1.972	0	1.972	0		11.5321 74.970 0.002 75.0						3.944	0.957			7.1083 96.010 0.233 96.2						3.944	0			1.7882 81.888 81.9						1.972	0
3.952	9507	3.952	8699.76	3.952	8.279		3.952	1491	3.952	0	3.952	0		1.976	4	1.976	0	1.976	0		11.5555 74.415 0.002 74.4						3.952	0.9507			7.1227 95.608 0.228 95.8						3.952	0			1.7918 81.074 81.1						1.976	0
3.96	9444	3.96	8633.55	3.96	8.34		3.96	1751	3.96	0	3.96	0		1.98	3	1.98	0	1.98	0		11.5788 73.864 0.002 73.9						3.96	0.9444			7.1371 95.207 0.223 95.4						3.96	0			1.7954 80.267 80.3						1.98	0
3.968	9419	3.968	8567.95	3.968	8.769		3.968	2076	3.968	0	3.968	0		1.984	2	1.984	0	1.984	0		11.6022 73.317 0.002 73.3						3.968	0.9419			7.1515 94.809 0.218 95.0						3.968	0			1.7991 79.468 79.5						1.984	0
3.976	9092	3.976	8502.97	3.976	6.177		3.976	2361	3.976	0	3.976	0		1.988	4	1.988	0	1.988	0		11.6255 72.774 0.002 72.8						3.976	0.9092			7.1659 94.412 0.214 94.6						3.976	0			1.8027 78.678 78.7						1.988	0
3.984	9129	3.984	8438.59	3.984	7.226		3.984	2709	3.984	0	3.984	0		1.992	3	1.992	0	1.992	0		11.6489 72.235 0.002 72.2						3.984	0.9129			7.1803 94.016 0.209 94.2						3.984	0			1.8063 77.895 77.9						1.992	0
3.992	9093	3.992	8374.81	3.992	7.532		3.992	2932	3.992	0	3.992	0		1.996	2	1.996	0	1.996	0		11.6722 71.700 0.002 71.7						3.992	0.9093			7.1947 93.622 0.205 93.8						3.992	0			1.8099 77.120 77.1						1.996	0
4	8890	4	8311.62	4	6.134		4	3517	4	0	4	0		2	6	2	0	2	0		11.6955 71.168 0.002 71.2						4	0.889			7.2090 93.230 0.200 93.4						4	0			1.8135 76.352 76.4						2	0
4.008	8750	4.008	8249.01	4.008	5.356		4.008	3722	4.008	0	4.008	0		2.004	5	2.004	0	2.004	0		11.7189 70.641 0.002 70.6						4.008	0.875			7.2234 92.840 0.196 93.0						4.008	0			1.8172 75.593 75.6						2.004	0
4.016	8474	4.016	8186.99	4.016	3.118		4.016	4141	4.016	0	4.016	0		2.008	4	2.008	0	2.008	0		11.7422 70.118 0.002 70.1						4.016	0.8474			7.2378 92.451 0.192 92.6						4.016	0			1.8208 74.840 74.8						2.008	0
4.024	8590	4.024	8125.55	4.024	5.011		4.024	4712	4.024	0	4.024	0		2.012	6	2.012	0	2.012	0		11.7656 69.599 0.002 69.6						4.024	0.859			7.2522 92.064 0.188 92.3						4.024	0			1.8244 74.096 74.1						2.012	0
4.032	8532	4.032	8064.68	4.032	5.059		4.032	5152	4.032	0	4.032	0		2.016	2	2.016	0	2.016	0		11.7889 69.083 0.002 69.1						4.032	0.8532			7.2666 91.678 0.184 91.9						4.032	0			1.8280 73.358 73.4						2.016	0
4.04	8401	4.04	8004.37	4.04	4.327		4.04	5487	4.04	0	4.04	0		2.02	4	2.02	0	2.02	0		11.8123 68.571 0.002 68.6						4.04	0.8401			7.2810 91.294 0.180 91.5						4.04	0			1.8316 72.629 72.6						2.02	0
4.048	8262	4.048	7944.61	4.048	3.492		4.048	6034	4.048	0	4.048	0		2.024	4	2.024	0	2.024	0		11.8356 68.064 0.002 68.1						4.048	0.8262			7.2954 90.912 0.176 91.1						4.048	0			1.8353 71.906 71.9						2.024	0
4.056	8233	4.056	7885.42	4.056	3.831		4.056	6434	4.056	0	4.056	0		2.028	3	2.028	0	2.028	0		11.8590 67.559 0.002 67.6						4.056	0.8233			7.3098 90.531 0.172 90.7						4.056	0			1.8389 71.190 71.2						2.028	0
4.064	7923	4.064	7826.77	4.064	1.081		4.064	6810	4.064	0	4.064	0		2.032	8	2.032	0	2.032	0		11.8823 67.059 0.002 67.1						4.064	0.7923			7.3242 90.152 0.168 90.3						4.064	0			1.8425 70.482 70.5						2.032	0
4.072	8030	4.072	7768.66	4.072	2.916		4.072	7147	4.072	0	4.072	0		2.036	7	2.036	0	2.036	0		11.9056 66.562 0.002 66.6						4.072	0.803			7.3385 89.774 0.165 89.9						4.072	0			1.8461 69.781 69.8						2.036	0
4.08	7903	4.08	7711.09	4.08	2.159		4.08	7432	4.08	0	4.08	0		2.04	5	2.04	0	2.04	0		11.9290 66.069 0.001 66.1						4.08	0.7903			7.3529 89.398 0.161 89.6						4.08	0			1.8497 69.086 69.1						2.04	0
4.088	7914	4.088	7654.05	4.088	2.922		4.088	7913	4.088	0	4.088	0		2.044	2	2.044	0	2.044	0		11.9523 65.580 0.001 65.6						4.088	0.7914			7.3673 89.024 0.158 89.2						4.088	0			1.8534 68.399 68.4						2.044	0
4.096	7658	4.096	7597.53	4.096	0.691		4.096	8146	4.096	0	4.096	0		2.048	4	2.048	0	2.048	0		11.9757 65.094 0.001 65.1						4.096	0.7658			7.3817 88.651 0.154 88.8						4.096	0			1.8570 67.718 67.7						2.048	0
4.104	7538	4.104	7541.54	4.104	-0.041		4.104	8412	4.104	0	4.104	0		2.052	1	2.052	0	2.052	0		11.9990 64.612 0.001 64.6						4.104	0.7538			7.3961 88.279 0.151 88.4						4.104	0			1.8606 67.045 67.0						2.052	0
4.112	7613	4.112	7486.06	4.112	1.455		4.112	8798	4.112	0	4.112	0		2.056	3	2.056	0	2.056	0		12.0224 64.133 0.001 64.1						4.112	0.7613			7.4105 87.910 0.148 88.1						4.112	0			1.8642 66.377 66.4						2.056	0
4.12	7446	4.12	7431.1	4.12	0.173		4.12	9235	4.12	0	4.12	0		2.06	8	2.06	0	2.06	0		12.0457 63.658 0.001 63.7						4.12	0.7446			7.4249 87.541 0.145 87.7						4.12	0			1.8678 65.717 65.7						2.06	0
4.128	7441	4.128	7376.63	4.128	0.746		4.128	9226	4.128	0	4.128	0		2.064	5	2.064	0	2.064	0		12.0691 63.187 0.001 63.2						4.128	0.7441			7.4393 87.175 0.142 87.3						4.128	0			1.8715 65.063 65.1						2.064	0
4.136	7341	4.136	7322.67	4.136	0.214		4.136	9547	4.136	0	4.136	0		2.068	4	2.068	0	2.068	0		12.0924 62.719 0.001 62.7						4.136	0.7341			7.4537 86.810 0.139 86.9						4.136	0			1.8751 64.416 64.4						2.068	0
4.144	7151	4.144	7269.21	4.144	-1.398		4.144	9540	4.144	0	4.144	0		2.072	3	2.072	0	2.072	0		12.1157 62.254 0.001 62.3						4.144	0.7151			7.4681 86.446 0.136 86.6						4.144	0			1.8787 63.775 63.8						2.072	0
4.152	7323	4.152	7216.24	4.152	1.248		4.152	9579	4.152	0	4.152	0		2.076	5	2.076	0	2.076	0		12.1391 61.793 0.001 61.8						4.152	0.7323			7.4824 86.084 0.133 86.2						4.152	0			1.8823 63.140 63.1						2.076	0
4.16	7175	4.16	7163.75	4.16	0.133		4.16	9835	4.16	0	4.16	0		2.08	2	2.08	0	2.08	0		12.1624 61.335 0.001 61.3						4.16	0.7175			7.4968 85.723 0.130 85.9						4.16	0			1.8859 62.512 62.5						2.08	0
4.168	7059	4.168	7111.74	4.168	-0.628		4.168	9616	4.1680 1	890.883	-4.168	13.001		2.084	2	2.084	0	2.084	0		12.1858 60.881 0.001 60.9						4.168	0.7059			7.5112 85.364 0.127 85.5						4.168	0			1.8896 61.890 61.9						2.084	0
4.176	6982	4.176	7060.21	4.176	-0.936		4.176	9928	4.1760 1	768.257	4.176	-8.433		2.088	2	2.088	0	2.088	0		12.2091 60.430 0.001 60.4						4.176	0.6982			7.5256 85.007 0.124 85.1						4.176	0			1.8932 61.274 61.3						2.088	0
4.184	6880	4.184	7009.15	4.184	-1.557		4.184	10000	4.1840 1	647.078	4.184	-6.471		2.092	5	2.092	0	2.092	0		12.2325 59.982 0.001 60.0						4.184	0.688			7.5400 84.651 0.122 84.8						4.184	0			1.8968 60.664 60.7						2.092	0
4.192	6728	4.192	6958.56	4.192	-2.811		4.192	9806	4.1920 1	527.33	4.192	-7.284		2.096	1	2.096	0	2.096	0		12.2558 59.538 0.001 59.5						4.192	0.6728			7.5544 84.296 0.119 84.4						4.192	0			1.9004 60.061 60.1						2.096	0
4.2	6705	4.2	6908.43	4.2	-2.484		4.2	9972	4.2000 1	408.997	4.2	-4.376		2.1	5	2.1	0	2.1	0		12.2792 59.097 0.001 59.1						4.2	0.6705			7.5688 83.943 0.117 84.1						4.2	0			1.9040 59.463 59.5						2.1	0
4.208	6764	4.208	6858.76	4.208	-1.152		4.208	9960	4.2080 1	292.06	4.208	-3.327		2.104	3	2.104	0	2.104	0		12.3025 58.659 0.001 58.7						4.208	0.6764			7.5832 83.591 0.114 83.7						4.208	0			1.9077 58.872 58.9						2.104	0
4.216	6686	4.216	6809.54	4.216	-1.511		4.216	9747	4.2160 1	176.502	4.216	-4.35		2.108	9	2.108	0	2.108	0		12.3258 58.225 0.001 58.2						4.216	0.6686			7.5976 83.241 0.112 83.4						4.216	0			1.9113 58.286 58.3						2.108	0
4.224	6730	4.224	6760.77	4.224	-0.375		4.224	9828	4.2240 1	62.309	4.224	-2.364		2.112	6	2.112	0	2.112	0		12.3492 57.794 0.001 57.8						4.224	0.673			7.6119 82.893 0.109 83.0						4.224	0			1.9149 57.706 57.7						2.112	0
4.232	6450	4.232	6712.45	4.232	-3.268		4.232	9605	4.232	9949.46	4.232	-3.515		2.116	2	2.116	0	2.116	0		12.3725 57.366 0.001 57.4						4.232	0.645			7.6263 82.545 0.107 82.7						4.232	0			1.9185 57.132 57.1						2.116	0
4.24	6695	4.24	6664.56	4.24	0.372		4.24	9672	4.24	9837.95	4.24	-1.687		2.12	4	2.12	0	2.12	0		12.3959 56.941 0.001 56.9						4.24	0.6695			7.6407 82.200 0.105 82.3						4.24	0			1.9221 56.563 56.6						2.12	0
4.248	6549	4.248	6617.11	4.248	-0.842		4.248	9745	4.248	9727.75	4.248	0.175		2.124	3	2.124	0	2.124	0		12.4192 56.519 0.001 56.5						4.248	0.6549			7.6551 81.855 0.102 82.0						4.248	0			1.9257 56.000 56.0						2.124	0
4.256	6171	4.256	6570.1	4.256	-5.08		4.256	9495	4.256	9618.85	4.256	-1.271		2.128	4	2.128	0	2.128	0		12.4426 56.100 0.001 56.1						4.256	0.6171			7.6695 81.512 0.100 81.6						4.256	0			1.9294 55.443 55.4						2.128	0
4.264	6369	4.264	6523.51	4.264	-1.936		4.264	9535	4.264	9511.23	4.264	0.243		2.132	5	2.132	0	2.132	0		12.4659 55.685 0.001 55.7						4.264	0.6369			7.6839 81.171 0.098 81.3						4.264	0			1.9330 54.891 54.9						2.132	0
4.272	6170	4.272	6477.34	4.272	-3.913		4.272	9410	4.272	9404.89	4.272	0.053		2.136	1	2.136	0	2.136	0		12.4893 55.272 0.001 55.3						4.272	0.617			7.6983 80.831 0.096 80.9						4.272	0			1.9366 54.345 54.3						2.136	0
4.28	6265	4.28	6431.59	4.28	-2.105		4.28	9324	4.28	9299.79	4.28	0.251		2.14	3	2.14	0	2.14	0		12.5126 54.863 0.001 54.9						4.28	0.6265			7.7127 80.493 0.094 80.6						4.28	0			1.9402 53.805 53.8						2.14	0
4.288	6209	4.288	6386.25	4.288	-2.249		4.288	9199	4.288	9195.94	4.288	0.032		2.144	3	2.144	0	2.144	0		12.5359 54.457 0.001 54.5						4.288	0.6209			7.7271 80.155 0.092 80.2						4.288	0			1.9438 53.269 53.3						2.144	0
4.296	6328	4.296	6341.33	4.296	-0.168		4.296	9106	4.296	9093.31	4.296	0.133		2.148	5	2.148	0	2.148	0		12.5593 54.053 0.001 54.1						4.296	0.6328			7.7414 79.820 0.090 79.9						4.296	0			1.9475 52.739 52.7						2.148	0
4.304	6151	4.304	6296.81	4.304	-1.859		4.304	8954	4.304	8991.89	4.304	-0.4		2.152	3	2.152	0	2.152	0		12.5826 53.653 0.001 53.7						4.304	0.6151			7.7558 79.485 0.088 79.6						4.304	0			1.9511 52.214 52.2						2.152	0
4.312	6018	4.312	6252.69	4.312	-3.025		4.312	8878	4.312	8891.66	4.312	-0.145		2.156	1	2.156	0	2.156	0		12.6060 53.255 0.001 53.3						4.312	0.6018			7.7702 79.152 0.086 79.2						4.312	0			1.9547 51.695 51.7						2.156	0
4.32	5874	4.32	6208.98	4.32	-4.371		4.32	8914	4.32	8792.62	4.32	1.286		2.16	4	2.16	0	2.16	0		12.6293 52.861 0.001 52.9						4.32	0.5874			7.7846 78.821 0.084 78.9						4.32	0			1.9583 51.180 51.2						2.16	0
4.328	5992	4.328	6165.65	4.328	-2.243		4.328	8622	4.328	8694.74	4.328	-0.783		2.164	4	2.164	0	2.164	0		12.6527 52.469 0.001 52.5						4.328	0.5992			7.7990 78.491 0.083 78.6						4.328	0			1.9619 50.671 50.7						2.164	0
4.336	5820	4.336	6122.72	4.336	-3.968		4.336	8779	4.336	8598.02	4.336	1.932		2.168	2	2.168	0	2.168	0		12.6760 52.081 0.001 52.1						4.336	0.582			7.8134 78.162 0.081 78.2						4.336	0			1.9656 50.167 50.2						2.168	0
4.344	5854	4.344	6080.18	4.344	-2.956		4.344	8615	4.344	8502.43	4.344	1.213		2.172	5	2.172	0	2.172	0		12.6994 51.695 0.001 51.7						4.344	0.5854			7.8278 77.835 0.079 77.9						4.344	0			1.9692 49.668 49.7						2.172	0
4.352	5823	4.352	6038.02	4.352	-2.818		4.352	8456	4.352	8407.97	4.352	0.522		2.176	4	2.176	0	2.176	0		12.7227 51.312 0.001 51.3						4.352	0.5823			7.8422 77.509 0.077 77.6						4.352	0			1.9728 49.174 49.2						2.176	0
4.36	5733	4.36	5996.23	4.36	-3.477		4.36	8345	4.36	8314.62	4.36	0.333		2.18	3	2.18	0	2.18	0		12.7460 50.932 0.001 50.9						4.36	0.5733			7.8566 77.184 0.076 77.3						4.36	0			1.9764 48.684 48.7						2.18	0
4.368	5711	4.368	5954.82	4.368	-3.226		4.368	8361	4.368	8222.37	4.368	1.516		2.184	4	2.184	0	2.184	0		12.7694 50.555 0.001 50.6						4.368	0.5711			7.8710 76.861 0.074 76.9						4.368	0			1.9800 48.200 48.2						2.184	0
4.376	5705	4.376	5913.79	4.376	-2.764		4.376	8361	4.376	8131.21	4.376	2.513		2.188	5	2.188	0	2.188	0		12.7927 50.180 0.000 50.2						4.376	0.5705			7.8853 76.539 0.072 76.6						4.376	0			1.9837 47.720 47.7						2.188	0
4.384	5600	4.384	5873.12	4.384	-3.65		4.384	8223	4.384	8041.12	4.384	2.006		2.192	3	2.192	0	2.192	0		12.8161 49.809 0.000 49.8						4.384	0.56			7.8997 76.218 0.071 76.3						4.384	0			1.9873 47.246 47.2						2.192	0
4.392	5587	4.392	5832.82	4.392	-3.289		4.392	7945	4.392	7952.09	4.392	-0.08		2.196	4	2.196	0	2.196	0		12.8394 49.440 0.000 49.4						4.392	0.5587			7.9141 75.899 0.069 76.0						4.392	0			1.9909 46.775 46.8						2.196	0
4.4	5583	4.4	5792.88	4.4	-2.809		4.4	8022	4.4	7864.11	4.4	1.763		2.2	3	2.2	0	2.2	0		12.8628 49.073 0.000 49.1						4.4	0.5583			7.9285 75.581 0.068 75.6						4.4	0			1.9945 46.310 46.3						2.2	0
4.408	5328	4.408	5753.29	4.408	-5.826		4.408	7941	4.408	7777.16	4.408	1.839		2.204	4	2.204	0	2.204	0		12.8861 48.710 0.000 48.7						4.408	0.5328			7.9429 75.264 0.066 75.3						4.408	0			1.9981 45.849 45.8						2.204	0
4.416	5465	4.416	5714.06	4.416	-3.369		4.416	7831	4.416	7691.24	4.416	1.579		2.208	2	2.208	0	2.208	0		12.9095 48.349 0.000 48.3						4.416	0.5465			7.9573 74.949 0.065 75.0						4.416	0			2.0018 45.393 45.4						2.208	0
4.424	5359	4.424	5675.18	4.424	-4.319		4.424	7676	4.424	7606.32	4.424	0.795		2.212	6	2.212	0	2.212	0		12.9328 47.991 0.000 48.0						4.424	0.5359			7.9717 74.635 0.064 74.7						4.424	0			2.0054 44.941 44.9						2.212	0
4.432	5249	4.432	5636.65	4.432	-5.351		4.432	7731	4.432	7522.41	4.432	2.372		2.216	3	2.216	0	2.216	0		12.9561 47.636 0.000 47.6						4.432	0.5249			7.9861 74.323 0.062 74.4						4.432	0			2.0090 44.494 44.5						2.216	0
4.44	5310	4.44	5598.46	4.44	-3.959		4.44	7666	4.44	7439.48	4.44	2.587		2.22	3	2.22	0	2.22	0		12.9795 47.283 0.000 47.3						4.44	0.531			8.0005 74.011 0.061 74.1						4.44	0			2.0126 44.051 44.1						2.22	0
4.448	5168	4.448	5560.61	4.448	-5.461		4.448	7629	4.448	7357.52	4.448	3.108		2.224	4	2.224	0	2.224	0		13.0028 46.932 0.000 46.9						4.448	0.5168			8.0148 73.701 0.060 73.8						4.448	0			2.0162 43.613 43.6						2.224	0
4.456	5255	4.456	5523.09	4.456	-3.698		4.456	7361	4.456	7276.53	4.456	0.984		2.228	3	2.228	0	2.228	0		13.0262 46.585 0.000 46.6						4.456	0.5255			8.0292 73.393 0.058 73.5						4.456	0			2.0199 43.179 43.2						2.228	0
4.464	5264	4.464	5485.91	4.464	-3.059		4.464	7369	4.464	7196.49	4.464	2.01		2.232	2	2.232	0	2.232	0		13.0495 46.240 0.000 46.2						4.464	0.5264			8.0436 73.085 0.057 73.1						4.464	0			2.0235 42.749 42.7						2.232	0
4.472	5010	4.472	5449.06	4.472	-6.203		4.472	7396	4.472	7117.4	4.472	3.24		2.236	4	2.236	0	2.236	0		13.0729 45.897 0.000 45.9						4.472	0.501			8.0580 72.779 0.056 72.8						4.472	0			2.0271 42.324 42.3						2.236	0
4.48	5070	4.48	5412.54	4.48	-4.811		4.48	7190	4.48	7039.23	4.48	1.778		2.24	2	2.24	0	2.24	0		13.0962 45.557 0.000 45.6						4.48	0.507			8.0724 72.474 0.055 72.5						4.48	0			2.0307 41.903 41.9						2.24	0
4.488	5038	4.488	5376.34	4.488	-4.767		4.488	7179	4.488	6961.98	4.488	2.561		2.244	3	2.244	0	2.244	0		13.1196 45.220 0.000 45.2						4.488	0.5038			8.0868 72.171 0.054 72.2						4.488	0			2.0343 41.486 41.5						2.244	0
4.496	4966	4.496	5340.47	4.496	-5.314		4.496	7087	4.496	6885.63	4.496	2.392		2.248	5	2.248	0	2.248	0		13.1429 44.885 0.000 44.9						4.496	0.4966			8.1012 71.868 0.052 71.9						4.496	0			2.0380 41.073 41.1						2.248	0
4.504	5052	4.504	5304.9	4.504	-3.558		4.504	6921	4.504	6810.18	4.504	1.332		2.252	1	2.252	0	2.252	0		13.1662 44.552 0.000 44.6						4.504	0.5052			8.1156 71.567 0.051 71.6						4.504	0			2.0416 40.665 40.7						2.252	0
4.512	4979	4.512	5269.66	4.512	-4.119		4.512	6819	4.512	6735.62	4.512	1.01		2.256	4	2.256	0	2.256	0		13.1896 44.222 0.000 44.2						4.512	0.4979			8.1300 71.268 0.050 71.3						4.512	0			2.0452 40.260 40.3						2.256	0
4.52	5018	4.52	5234.72	4.52	-3.059		4.52	6978	4.52	6661.94	4.52	3.784		2.26	7	2.26	0	2.26	0		13.2129 43.895 0.000 43.9						4.52	0.5018			8.1443 70.969 0.049 71.0						4.52	0			2.0488 39.859 39.9						2.26	0
4.528	5109	4.528	5200.1	4.528	-1.274		4.528	6803	4.528	6589.11	4.528	2.593		2.264	2	2.264	0	2.264	0		13.2363 43.570 0.000 43.6						4.528	0.5109			8.1587 70.672 0.048 70.7						4.528	0			2.0524 39.463 39.5						2.264	0
4.536	4940	4.536	5165.77	4.536	-3.212		4.536	6717	4.536	6517.15	4.536	2.438		2.268	5	2.268	0	2.268	0		13.2596 43.247 0.000 43.2						4.536	0.494			8.1731 70.376 0.047 70.4						4.536	0			2.0561 39.070 39.1						2.268	0
4.544	4872	4.544	5131.76	4.544	-3.721		4.544	6678	4.544	6446.02	4.544	2.839		2.272	5	2.272	0	2.272	0		13.2830 42.927 0.000 42.9						4.544	0.4872			8.1875 70.081 0.046 70.1						4.544	0			2.0597 38.681 38.7						2.272	0
4.552	4717	4.552	5098.04	4.552	-5.548		4.552	6640	4.552	6375.74	4.552	3.243		2.276	5	2.276	0	2.276	0		13.3063 42.609 0.000 42.6						4.552	0.4717			8.2019 69.787 0.045 69.8						4.552	0			2.0633 38.296 38.3						2.276	0
4.56	4805	4.56	5064.61	4.56	-3.745		4.56	6513	4.56	6306.27	4.56	2.562		2.28	2	2.28	0	2.28	0		13.3297 42.293 0.000 42.3						4.56	0.4805			8.2163 69.495 0.044 69.5						4.56	0			2.0669 37.915 37.9						2.28	0
4.568	4718	4.568	5031.48	4.568	-4.564		4.568	6547	4.568	6237.62	4.568	3.824		2.284	4	2.284	0	2.284	0		13.3530 41.980 0.000 42.0						4.568	0.4718			8.2307 69.204 0.043 69.2						4.568	0			2.0705 37.538 37.5						2.284	0
4.576	4753	4.576	4998.64	4.576	-3.563		4.576	6339	4.576	6169.78	4.576	2.125		2.288	1	2.288	0	2.288	0		13.3763 41.669 0.000 41.7						4.576	0.4753			8.2451 68.914 0.042 69.0						4.576	0			2.0742 37.165 37.2						2.288	0
4.584	4788	4.584	4966.09	4.584	-2.574		4.584	6173	4.584	6102.73	4.584	0.894		2.292	3	2.292	0	2.292	0		13.3997 41.360 0.000 41.4						4.584	0.4788			8.2595 68.626 0.041 68.7						4.584	0			2.0778 36.795 36.8						2.292	0
4.592	4715	4.592	4933.83	4.592	-3.187		4.592	6286	4.592	6036.46	4.592	3.147		2.296	6	2.296	0	2.296	0		13.4230 41.054 0.000 41.1						4.592	0.4715			8.2739 68.338 0.040 68.4						4.592	0			2.0814 36.429 36.4						2.296	0
4.6	4663	4.6	4901.84	4.6	-3.498		4.6	6025	4.6	5970.98	4.6	0.696		2.3	8	2.3	0	2.3	0		13.4464 40.750 0.000 40.8						4.6	0.4663			8.2882 68.052 0.040 68.1						4.6	0			2.0850 36.066 36.1						2.3	0
4.608	4630	4.608	4870.14	4.608	-3.529		4.608	6138	4.608	5906.26	4.608	2.958		2.304	3	2.304	0	2.304	0		13.4697 40.448 0.000 40.4						4.608	0.463			8.3026 67.767 0.039 67.8						4.608	0			2.0886 35.707 35.7						2.304	0
4.616	4582	4.616	4838.71	4.616	-3.792		4.616	6114	4.616	5842.3	4.616	3.475		2.308	7	2.308	0	2.308	0		13.4931 40.148 0.000 40.1						4.616	0.4582			8.3170 67.483 0.038 67.5						4.616	0			2.0923 35.352 35.4						2.308	0
4.624	4625	4.624	4807.55	4.624	-2.684		4.624	5844	4.624	5779.08	4.624	0.849		2.312	3	2.312	0	2.312	0		13.5164 39.851 0.000 39.9						4.624	0.4625			8.3314 67.200 0.037 67.2						4.624	0			2.0959 35.000 35.0						2.312	0
4.632	4530	4.632	4776.67	4.632	-3.665		4.632	6075	4.632	5716.61	4.632	4.598		2.316	2	2.316	0	2.316	0		13.5398 39.556 0.000 39.6						4.632	0.453			8.3458 66.919 0.036 67.0						4.632	0			2.0995 34.652 34.7						2.316	0
4.64	4558	4.64	4746.06	4.64	-2.785		4.64	5803	4.64	5654.87	4.64	1.945		2.32	3	2.32	0	2.32	0		13.5631 39.263 0.000 39.3						4.64	0.4558			8.3602 66.639 0.036 66.7						4.64	0			2.1031 34.307 34.3						2.32	0
4.648	4609	4.648	4715.71	4.648	-1.572		4.648	5846	4.648	5593.85	4.648	3.298		2.324	2	2.324	0	2.324	0		13.5864 38.972 0.000 39.0						4.648	0.4609			8.3746 66.359 0.035 66.4						4.648	0			2.1067 33.966 34.0						2.324	0
4.656	4409	4.656	4685.62	4.656	-4.166		4.656	5670	4.656	5533.55	4.656	1.812		2.328	2	2.328	0	2.328	0		13.6098 38.683 0.000 38.7						4.656	0.4409			8.3890 66.081 0.034 66.1						4.656	0			2.1104 33.628 33.6						2.328	0
4.664	4407	4.664	4655.8	4.664	-3.748		4.664	5703	4.664	5473.95	4.664	3.033		2.332	7	2.332	0	2.332	0		13.6331 38.397 0.000 38.4						4.664	0.4407			8.4034 65.805 0.033 65.8						4.664	0			2.1140 33.293 33.3						2.332	0
4.672	4354	4.672	4626.23	4.672	-4.126		4.672	5545	4.672	5415.05	4.672	1.745		2.336	5	2.336	0	2.336	0		13.6565 38.112 0.000 38.1						4.672	0.4354			8.4177 65.529 0.033 65.6						4.672	0			2.1176 32.962 33.0						2.336	0
4.68	4461	4.68	4596.93	4.68	-2.035		4.68	5517	4.68	5356.83	4.68	2.156		2.34	6	2.34	0	2.34	0		13.6798 37.830 0.000 37.8						4.68	0.4461			8.4321 65.255 0.032 65.3						4.68	0			2.1212 32.634 32.6						2.34	0
4.688	4450	4.688	4567.87	4.688	-1.767		4.688	5436	4.688	5299.3	4.688	1.854		2.344	4	2.344	0	2.344	0		13.7032 37.550 0.000 37.6						4.688	0.445			8.4465 64.981 0.031 65.0						4.688	0			2.1248 32.309 32.3						2.344	0
4.696	4317	4.696	4539.06	4.696	-3.38		4.696	5340	4.696	5242.44	4.696	1.335		2.348	1	2.348	0	2.348	0		13.7265 37.272 0.000 37.3						4.696	0.4317			8.4609 64.709 0.031 64.7						4.696	0			2.1285 31.988 32.0						2.348	0
4.704	4169	4.704	4510.51	4.704	-5.289		4.704	5308	4.704	5186.24	4.704	1.671		2.352	5	2.352	0	2.352	0		13.7499 36.996 0.000 37.0						4.704	0.4169			8.4753 64.438 0.030 64.5						4.704	0			2.1321 31.670 31.7						2.352	0
4.712	4233	4.712	4482.2	4.712	-3.83		4.712	5313	4.712	5130.71	4.712	2.501		2.356	1	2.356	0	2.356	0		13.7732 36.722 0.000 36.7						4.712	0.4233			8.4897 64.168 0.029 64.2						4.712	0			2.1357 31.354 31.4						2.356	0
4.72	4187	4.72	4454.13	4.72	-4.128		4.72	5190	4.72	5075.82	4.72	1.585		2.36	1	2.36	0	2.36	0		13.7965 36.450 0.000 36.4						4.72	0.4187			8.5041 63.899 0.029 63.9						4.72	0			2.1393 31.043 31.0						2.36	0
4.728	4117	4.728	4426.3	4.728	-4.821		4.728	5076	4.728	5021.57	4.728	0.764		2.364	3	2.364	0	2.364	0		13.8199 36.180 0.000 36.2						4.728	0.4117			8.5185 63.632 0.028 63.7						4.728	0			2.1429 30.734 30.7						2.364	0
4.736	4160	4.736	4398.72	4.736	-3.701		4.736	5081	4.736	4967.95	4.736	1.586		2.368	4	2.368	0	2.368	0		13.8432 35.912 0.000 35.9						4.736	0.416			8.5329 63.365 0.027 63.4						4.736	0			2.1466 30.428 30.4						2.368	0
4.744	4046	4.744	4371.37	4.744	-5.115		4.744	4880	4.744	4914.96	4.744	-0.501		2.372	7	2.372	0	2.372	0		13.8666 35.646 0.000 35.6						4.744	0.4046			8.5473 63.100 0.027 63.1						4.744	0			2.1502 30.125 30.1						2.372	0
4.752	4159	4.752	4344.25	4.752	-2.873		4.752	4958	4.752	4862.59	4.752	1.355		2.376	3	2.376	0	2.376	0		13.8899 35.382 0.000 35.4						4.752	0.4159			8.5616 62.835 0.026 62.9						4.752	0			2.1538 29.825 29.8						2.376	0
4.76	4120	4.76	4317.37	4.76	-3.075		4.76	4760	4.76	4810.83	4.76	-0.737		2.38	1	2.38	0	2.38	0		13.9133 35.120 0.000 35.1						4.76	0.412			8.5760 62.572 0.026 62.6						4.76	0			2.1574 29.529 29.5						2.38	0
4.768	4062	4.768	4290.71	4.768	-3.589		4.768	4781	4.768	4759.68	4.768	0.308		2.384	4	2.384	0	2.384	0		13.9366 34.859 0.000 34.9						4.768	0.4062			8.5904 62.310 0.025 62.3						4.768	0			2.1610 29.235 29.2						2.384	0
4.776	4054	4.776	4264.29	4.776	-3.303		4.776	4758	4.776	4709.12	4.776	0.709		2.388	5	2.388	0	2.388	0		13.9600 34.601 0.000 34.6						4.776	0.4054			8.6048 62.049 0.025 62.1						4.776	0			2.1647 28.944 28.9						2.388	0
4.784	4020	4.784	4238.08	4.784	-3.44		4.784	4656	4.784	4659.15	4.784	-0.046		2.392	2	2.392	0	2.392	0		13.9833 34.345 0.000 34.3						4.784	0.402			8.6192 61.789 0.024 61.8						4.784	0			2.1683 28.656 28.7						2.392	0
4.792	4011	4.792	4212.11	4.792	-3.175		4.792	4665	4.792	4609.76	4.792	0.809		2.396	3	2.396	0	2.396	0		14.0066 34.091 0.000 34.1						4.792	0.4011			8.6336 61.531 0.024 61.6						4.792	0			2.1719 28.371 28.4						2.396	0
4.8	4043	4.8	4186.35	4.8	-2.254		4.8	4769	4.8	4560.95	4.8	3.013		2.4	4	2.4	0	2.4	0		14.0300 33.838 0.000 33.8						4.8	0.4043			8.6480 61.273 0.023 61.3						4.8	0			2.1755 28.088 28.1						2.4	0
4.808	3966	4.808	4160.81	4.808	-3.093		4.808	4463	4.808	4512.71	4.808	-0.744		2.404	1	2.404	0	2.404	0		14.0533 33.587 0.000 33.6						4.808	0.3966			8.6624 61.016 0.023 61.0						4.808	0			2.1791 27.809 27.8						2.404	0
4.816	4015	4.816	4135.49	4.816	-1.902		4.816	4543	4.816	4465.03	4.816	1.157		2.408	3	2.408	0	2.408	0		14.0767 33.339 0.000 33.3						4.816	0.4015			8.6768 60.761 0.022 60.8						4.816	0			2.1828 27.532 27.5						2.408	0
4.824	3893	4.824	4110.38	4.824	-3.484		4.824	4563	4.824	4417.91	4.824	2.148		2.412	3	2.412	0	2.412	0		14.1000 33.092 0.000 33.1						4.824	0.3893			8.6911 60.506 0.022 60.5						4.824	0			2.1864 27.258 27.3						2.412	0
4.832	3880	4.832	4085.49	4.832	-3.299		4.832	4354	4.832	4371.33	4.832	-0.263		2.416	2	2.416	0	2.416	0		14.1234 32.847 0.000 32.8						4.832	0.388			8.7055 60.253 0.021 60.3						4.832	0			2.1900 26.987 27.0						2.416	0
4.84	3868	4.84	4060.81	4.84	-3.1		4.84	4391	4.84	4325.3	4.84	0.992		2.42	5	2.42	0	2.42	0		14.1467 32.603 0.000 32.6						4.84	0.3868			8.7199 60.000 0.021 60.0						4.84	0			2.1936 26.719 26.7						2.42	0
4.848	3890	4.848	4036.33	4.848	-2.346		4.848	4341	4.848	4279.8	4.848	0.929		2.424	7	2.424	0	2.424	0		14.1701 32.362 0.000 32.4						4.848	0.389			8.7343 59.749 0.020 59.8						4.848	0			2.1972 26.453 26.5						2.424	0
4.856	3869	4.856	4012.06	4.856	-2.3		4.856	4184	4.856	4234.83	4.856	-0.786		2.428	6	2.428	0	2.428	0		14.1934 32.122 0.000 32.1						4.856	0.3869			8.7487 59.499 0.020 59.5						4.856	0			2.2009 26.189 26.2						2.428	0
4.864	3868	4.864	3988	4.864	-1.929		4.864	4195	4.864	4190.39	4.864	0.071		2.432	3	2.432	0	2.432	0		14.2167 31.884 0.000 31.9						4.864	0.3868			8.7631 59.249 0.019 59.3						4.864	0			2.2045 25.929 25.9						2.432	0
4.872	3900	4.872	3964.14	4.872	-1.027		4.872	4132	4.872	4146.46	4.872	-0.225		2.436	3	2.436	0	2.436	0		14.2401 31.648 0.000 31.6						4.872	0.39			8.7775 59.001 0.019 59.0						4.872	0			2.2081 25.671 25.7						2.436	0
4.88	3682	4.88	3940.48	4.88	-4.26		4.88	3979	4.88	4103.04	4.88	-1.966		2.44	0	2.44	0	2.44	0		14.2634 31.414 0.000 31.4						4.88	0.3682			8.7919 58.754 0.019 58.8						4.88	0			2.2117 25.415 25.4						2.44	0
4.888	3794	4.888	3917.02	4.888	-1.997		4.888	4024	4.888	4060.13	4.888	-0.57		2.444	4	2.444	0	2.444	0		14.2868 31.181 0.000 31.2						4.888	0.3794			8.8063 58.508 0.018 58.5						4.888	0			2.2153 25.163 25.2						2.444	0
4.896	3739	4.896	3893.75	4.896	-2.531		4.896	3963	4.896	4017.72	4.896	-0.869		2.448	3	2.448	0	2.448	0		14.3101 30.950 0.000 30.9						4.896	0.3739			8.8206 58.263 0.018 58.3						4.896	0			2.2190 24.912 24.9						2.448	0
4.904	3734	4.904	3870.68	4.904	-2.237		4.904	3891	4.904	3975.8	4.904	-1.359		2.452	0	2.452	0	2.452	0		14.3335 30.721 0.000 30.7						4.904	0.3734			8.8350 58.019 0.017 58.0						4.904	0			2.2226 24.664 24.7						2.452	0
4.912	3896	4.912	3847.8	4.912	0.772		4.912	3969	4.912	3934.36	4.912	0.55		2.456	7	2.456	0	2.456	0		14.3568 30.493 0.000 30.5						4.912	0.3896			8.8494 57.776 0.017 57.8						4.912	0			2.2262 24.419 24.4						2.456	0
4.92	3843	4.92	3825.12	4.92	0.288		4.92	3725	4.92	3893.41	4.92	-2.759		2.46	3	2.46	0	2.46	0		14.3802 30.267 0.000 30.3						4.92	0.3843			8.8638 57.534 0.017 57.6						4.92	0			2.2298 24.176 24.2						2.46	0
4.928	3676	4.928	3802.62	4.928	-2.088		4.928	3790	4.928	3852.93	4.928	-1.022		2.464	2	2.464	0	2.464	0		14.4035 30.043 0.000 30.0						4.928	0.3676			8.8782 57.293 0.016 57.3						4.928	0			2.2334 23.935 23.9						2.464	0
4.936	3733	4.936	3780.31	4.936	-0.774		4.936	3948	4.936	3812.92	4.936	2.15		2.468	2	2.468	0	2.468	0		14.4268 29.821 0.000 29.8						4.936	0.3733			8.8926 57.053 0.016 57.1						4.936	0			2.2371 23.697 23.7						2.468	0
4.944	3717	4.944	3758.19	4.944	-0.676		4.944	3759	4.944	3773.38	4.944	-0.235		2.472	4	2.472	0	2.472	0		14.4502 29.600 0.000 29.6						4.944	0.3717			8.9070 56.814 0.016 56.8						4.944	0			2.2407 23.461 23.5						2.472	0
4.952	3691	4.952	3736.25	4.952	-0.745		4.952	3668	4.952	3734.3	4.952	-1.095		2.476	4	2.476	0	2.476	0		14.4735 29.380 0.000 29.4						4.952	0.3691			8.9214 56.576 0.015 56.6						4.952	0			2.2443 23.228 23.2						2.476	0
4.96	3719	4.96	3714.49	4.96	0.074		4.96	3625	4.96	3695.66	4.96	-1.174		2.48	3	2.48	0	2.48	0		14.4969 29.163 0.000 29.2						4.96	0.3719			8.9358 56.339 0.015 56.4						4.96	0			2.2479 22.997 23.0						2.48	0
4.968	3581	4.968	3692.91	4.968	-1.87		4.968	3647	4.968	3657.48	4.968	-0.174		2.484	2	2.484	0	2.484	0		14.5202 28.947 0.000 28.9						4.968	0.3581			8.9502 56.103 0.015 56.1						4.968	0			2.2515 22.768 22.8						2.484	0
4.976	3651	4.976	3671.51	4.976	-0.339		4.976	3628	4.976	3619.74	4.976	0.137		2.488	2	2.488	0	2.488	0		14.5436 28.732 0.000 28.7						4.976	0.3651			8.9645 55.868 0.014 55.9						4.976	0			2.2552 22.541 22.5						2.488	0
4.984	3559	4.984	3650.29	4.984	-1.53		4.984	3491	4.984	3582.44	4.984	-1.548		2.492	2	2.492	0	2.492	0		14.5669 28.520 0.000 28.5						4.984	0.3559			8.9789 55.634 0.014 55.6						4.984	0			2.2588 22.317 22.3						2.492	0
4.992	3494	4.992	3629.24	4.992	-2.288		4.992	3619	4.992	3545.57	4.992	1.221		2.496	1	2.496	0	2.496	0		14.5903 28.308 0.000 28.3						4.992	0.3494			8.9933 55.401 0.014 55.4						4.992	0			2.2624 22.095 22.1						2.496	0
5	3562	5	3608.37	5	-0.777		5	3542	5	3509.12	5	0.552		2.5	7	2.5	0	2.5	0		14.6136 28.099 0.000 28.1						5	0.3562			9.0077 55.169 0.013 55.2						5	0			2.2660 21.875 21.9						2.5	0
5.008	3604	5.008	3587.67	5.008	0.272		5.008	3375	5.008	3473.1	5.008	-1.689		2.504	5	2.504	0	2.504	0		14.6369 27.890 0.000 27.9						5.008	0.3604			9.0221 54.938 0.013 55.0						5.008	0			2.2696 21.658 21.7						2.504	0
5.016	3530	5.016	3567.14	5.016	-0.625		5.016	3325	5.016	3437.49	5.016	-1.951		2.508	5	2.508	0	2.508	0		14.6603 27.684 0.000 27.7						5.016	0.353			9.0365 54.708 0.013 54.7						5.016	0			2.2733 21.442 21.4						2.508	0
5.024	3601	5.024	3546.77	5.024	0.904		5.024	3507	5.024	3402.3	5.024	1.768		2.512	3	2.512	0	2.512	0		14.6836 27.479 0.000 27.5						5.024	0.3601			9.0509 54.479 0.013 54.5						5.024	0			2.2769 21.229 21.2						2.512	0
5.032	3526	5.032	3526.58	5.032	-0.01		5.032	3497	5.032	3367.51	5.032	2.19		2.516	4	2.516	0	2.516	0		14.7070 27.275 0.000 27.3						5.032	0.3526			9.0653 54.251 0.012 54.3						5.032	0			2.2805 21.018 21.0						2.516	0
5.04	3579	5.04	3506.55	5.04	1.211		5.04	3316	5.04	3333.13	5.04	-0.297		2.52	3	2.52	0	2.52	0		14.7303 27.073 0.000 27.1						5.04	0.3579			9.0797 54.023 0.012 54.0						5.04	0			2.2841 20.808 20.8						2.52	0
5.048	3546	5.048	3486.68	5.048	0.996		5.048	3286	5.048	3299.14	5.048	-0.229		2.524	2	2.524	0	2.524	0		14.7537 26.873 0.000 26.9						5.048	0.3546			9.0940 53.797 0.012 53.8						5.048	0			2.2877 20.601 20.6						2.524	0
5.056	3446	5.056	3466.98	5.056	-0.357		5.056	3231	5.056	3265.55	5.056	-0.608		2.528	5	2.528	0	2.528	0		14.7770 26.674 0.000 26.7						5.056	0.3446			9.1084 53.572 0.012 53.6						5.056	0			2.2914 20.396 20.4						2.528	0
5.064	3467	5.064	3447.43	5.064	0.332		5.064	3210	5.064	3232.34	5.064	-0.394		2.532	0	2.532	0	2.532	0		14.8004 26.476 0.000 26.5						5.064	0.3467			9.1228 53.347 0.011 53.4						5.064	0			2.2950 20.193 20.2						2.532	0
5.072	3443	5.072	3428.05	5.072	0.255		5.072	3225	5.072	3199.52	5.072	0.449		2.536	3	2.536	0	2.536	0		14.8237 26.280 0.000 26.3						5.072	0.3443			9.1372 53.124 0.011 53.1						5.072	0			2.2986 19.993 20.0						2.536	0
5.08	3415	5.08	3408.82	5.08	0.106		5.08	3170	5.08	3167.08	5.08	0.052		2.54	4	2.54	0	2.54	0		14.8470 26.085 0.000 26.1						5.08	0.3415			9.1516 52.901 0.011 52.9						5.08	0			2.3022 19.794 19.8						2.54	0
5.088	3432	5.088	3389.75	5.088	0.721		5.088	3145	5.088	3135.01	5.088	0.178		2.544	1	2.544	0	2.544	0		14.8704 25.892 0.000 25.9						5.088	0.3432			9.1660 52.680 0.011 52.7						5.088	0			2.3058 19.597 19.6						2.544	0
5.096	3512	5.096	3370.84	5.096	2.382		5.096	3072	5.096	3103.31	5.096	-0.565		2.548	5	2.548	0	2.548	0		14.8937 25.700 0.000 25.7						5.096	0.3512			9.1804 52.459 0.010 52.5						5.096	0			2.3095 19.402 19.4						2.548	0
5.104	3315	5.104	3352.07	5.104	-0.644		5.104	2985	5.104	3071.98	5.104	-1.592		2.552	6	2.552	0	2.552	0		14.9171 25.510 0.000 25.5						5.104	0.3315			9.1948 52.239 0.010 52.2						5.104	0			2.3131 19.209 19.2						2.552	0
5.112	3339	5.112	3333.46	5.112	0.096		5.112	3172	5.112	3041	5.112	2.326		2.556	6	2.556	0	2.556	0		14.9404 25.321 0.000 25.3						5.112	0.3339			9.2092 52.021 0.010 52.0						5.112	0			2.3167 19.017 19.0						2.556	0
5.12	3259	5.12	3315	5.12	-0.981		5.12	2953	5.12	3010.39	5.12	-1.056		2.56	4	2.56	0	2.56	0		14.9638 25.133 0.000 25.1						5.12	0.3259			9.2235 51.803 0.010 51.8						5.12	0			2.3203 18.828 18.8						2.56	0
5.128	3303	5.128	3296.69	5.128	0.11		5.128	2932	5.128	2980.13	5.128	-0.889		2.564	3	2.564	0	2.564	0		14.9871 24.947 0.000 24.9						5.128	0.3303			9.2379 51.586 0.010 51.6						5.128	0			2.3239 18.641 18.6						2.564	0
5.136	3248	5.136	3278.53	5.136	-0.536		5.136	2931	5.136	2950.21	5.136	-0.355		2.568	2	2.568	0	2.568	0		15.0105 24.763 0.000 24.8						5.136	0.3248			9.2523 51.370 0.009 51.4						5.136	0			2.3276 18.455 18.5						2.568	0
5.144	3293	5.144	3260.51	5.144	0.566		5.144	2899	5.144	2920.64	5.144	-0.402		2.572	8	2.572	0	2.572	0		15.0338 24.579 0.000 24.6						5.144	0.3293			9.2667 51.154 0.009 51.2						5.144	0			2.3312 18.272 18.3						2.572	0
5.152	3250	5.152	3242.63	5.152	0.129		5.152	2902	5.152	2891.41	5.152	0.197		2.576	1	2.576	0	2.576	0		15.0571 24.397 0.000 24.4						5.152	0.325			9.2811 50.940 0.009 50.9						5.152	0			2.3348 18.090 18.1						2.576	0
5.16	3182	5.16	3224.9	5.16	-0.761		5.16	2898	5.16	2862.52	5.16	0.659		2.58	5	2.58	0	2.58	0		15.0805 24.216 0.000 24.2						5.16	0.3182			9.2955 50.727 0.009 50.7						5.16	0			2.3384 17.910 17.9						2.58	0
5.168	3144	5.168	3207.31	5.168	-1.129		5.168	2867	5.168	2833.96	5.168	0.617		2.584	5	2.584	0	2.584	0		15.1038 24.037 0.000 24.0						5.168	0.3144			9.3099 50.514 0.009 50.5						5.168	0			2.3420 17.732 17.7						2.584	0
5.176	3130	5.176	3189.86	5.176	-1.07		5.176	2786	5.176	2805.73	5.176	-0.374		2.588	7	2.588	0	2.588	0		15.1272 23.859 0.000 23.9						5.176	0.313			9.3243 50.303 0.008 50.3						5.176	0			2.3457 17.555 17.6						2.588	0
5.184	3167	5.184	3172.56	5.184	-0.099		5.184	2804	5.184	2777.82	5.184	0.494		2.592	4	2.592	0	2.592	0		15.1505 23.682 0.000 23.7						5.184	0.3167			9.3387 50.092 0.008 50.1						5.184	0			2.3493 17.381 17.4						2.592	0
5.192	3148	5.192	3155.39	5.192	-0.132		5.192	2799	5.192	2750.23	5.192	0.922		2.596	3	2.596	0	2.596	0		15.1739 23.507 0.000 23.5						5.192	0.3148			9.3531 49.882 0.008 49.9						5.192	0			2.3529 17.208 17.2						2.596	0
5.2	3288	5.2	3138.35	5.2	2.61		5.2	2705	5.2	2722.96	5.2	-0.345		2.6	1	2.6	0	2.6	0		15.1972 23.333 0.000 23.3						5.2	0.3288			9.3674 49.673 0.008 49.7						5.2	0			2.3565 17.036 17.0						2.6	0
5.208	3121	5.208	3121.45	5.208	-0.008		5.208	2731	5.208	2696.01	5.208	0.67		2.604	5	2.604	0	2.604	0		15.2206 23.160 0.000 23.2						5.208	0.3121			9.3818 49.465 0.008 49.5						5.208	0			2.3601 16.867 16.9						2.604	0
5.216	3167	5.216	3104.69	5.216	1.107		5.216	2614	5.216	2669.36	5.216	-1.083		2.608	3	2.608	0	2.608	0		15.2439 22.988 0.000 23.0						5.216	0.3167			9.3962 49.258 0.007 49.3						5.216	0			2.3637 16.699 16.7						2.608	0
5.224	3153	5.224	3088.05	5.224	1.157		5.224	2567	5.224	2643.02	5.224	-1.5		2.612	2	2.612	0	2.612	0		15.2672 22.818 0.000 22.8						5.224	0.3153			9.4106 49.052 0.007 49.1						5.224	0			2.3674 16.533 16.5						2.612	0
5.232	3074	5.232	3071.55	5.232	0.044		5.232	2620	5.232	2616.98	5.232	0.059		2.616	3	2.616	0	2.616	0		15.2906 22.649 0.000 22.6						5.232	0.3074			9.4250 48.846 0.007 48.9						5.232	0			2.3710 16.368 16.4						2.616	0
5.24	3089	5.24	3055.18	5.24	0.608		5.24	2545	5.24	2591.24	5.24	-0.917		2.62	2	2.62	0	2.62	0		15.3139 22.481 0.000 22.5						5.24	0.3089			9.4394 48.642 0.007 48.6						5.24	0			2.3746 16.206 16.2						2.62	0
5.248	3076	5.248	3038.94	5.248	0.668		5.248	2593	5.248	2565.79	5.248	0.534		2.624	3	2.624	0	2.624	0		15.3373 22.315 0.000 22.3						5.248	0.3076			9.4538 48.438 0.007 48.4						5.248	0			2.3782 16.044 16.0						2.624	0
5.256	3028	5.256	3022.83	5.256	0.094		5.256	2443	5.256	2540.64	5.256	-1.975		2.628	3	2.628	0	2.628	0		15.3606 22.149 0.000 22.1						5.256	0.3028			9.4682 48.235 0.007 48.2						5.256	0			2.3818 15.885 15.9						2.628	0
5.264	3025	5.264	3006.84	5.264	0.33		5.264	2492	5.264	2515.77	5.264	-0.476		2.632	2	2.632	0	2.632	0		15.3840 21.985 0.000 22.0						5.264	0.3025			9.4826 48.033 0.007 48.0						5.264	0			2.3855 15.727 15.7						2.632	0
5.272	3035	5.272	2990.98	5.272	0.799		5.272	2417	5.272	2491.19	5.272	-1.509		2.636	0	2.636	0	2.636	0		15.4073 21.823 0.000 21.8						5.272	0.3035			9.4969 47.832 0.006 47.8						5.272	0			2.3891 15.570 15.6						2.636	0
5.28	3034	5.28	2975.24	5.28	1.067		5.28	2368	5.28	2466.89	5.28	-2.032		2.64	2	2.64	0	2.64	0		15.4307 21.661 0.000 21.7						5.28	0.3034			9.5113 47.632 0.006 47.6						5.28	0			2.3927 15.415 15.4						2.64	0
5.288	3023	5.288	2959.63	5.288	1.153		5.288	2412	5.288	2442.86	5.288	-0.628		2.644	3	2.644	0	2.644	0		15.4540 21.500 0.000 21.5						5.288	0.3023			9.5257 47.432 0.006 47.4						5.288	0			2.3963 15.262 15.3						2.644	0
5.296	2955	5.296	2944.14	5.296	0.2		5.296	2450	5.296	2419.11	5.296	0.624		2.648	3	2.648	0	2.648	0		15.4773 21.341 0.000 21.3						5.296	0.2955			9.5401 47.233 0.006 47.2						5.296	0			2.3999 15.110 15.1						2.648	0
5.304	2967	5.304	2928.76	5.304	0.702		5.304	2361	5.304	2395.64	5.304	-0.713		2.652	8	2.652	0	2.652	0		15.5007 21.183 0.000 21.2						5.304	0.2967			9.5545 47.035 0.006 47.0						5.304	0			2.4036 14.960 15.0						2.652	0
5.312	2889	5.312	2913.51	5.312	-0.456		5.312	2385	5.312	2372.43	5.312	0.257		2.656	4	2.656	0	2.656	0		15.5240 21.026 0.000 21.0						5.312	0.2889			9.5689 46.838 0.006 46.8						5.312	0			2.4072 14.811 14.8						2.656	0
5.32	2960	5.32	2898.38	5.32	1.133		5.32	2422	5.32	2349.49	5.32	1.473		2.66	1	2.66	0	2.66	0		15.5474 20.870 0.000 20.9						5.32	0.296			9.5833 46.642 0.006 46.6						5.32	0			2.4108 14.663 14.7						2.66	0
5.328	2935	5.328	2883.36	5.328	0.953		5.328	2278	5.328	2326.8	5.328	-1.022		2.664	2	2.664	0	2.664	0		15.5707 20.716 0.000 20.7						5.328	0.2935			9.5977 46.447 0.006 46.5						5.328	0			2.4144 14.518 14.5						2.664	0
5.336	2896	5.336	2868.46	5.336	0.512		5.336	2322	5.336	2304.38	5.336	0.366		2.668	2	2.668	0	2.668	0		15.5941 20.562 0.000 20.6						5.336	0.2896			9.6121 46.252 0.005 46.3						5.336	0			2.4180 14.373 14.4						2.668	0
5.344	2879	5.344	2853.68	5.344	0.472		5.344	2250	5.344	2282.21	5.344	-0.679		2.672	7	2.672	0	2.672	0		15.6174 20.410 0.000 20.4						5.344	0.2879			9.6264 46.059 0.005 46.1						5.344	0			2.4217 14.230 14.2						2.672	0
5.352	2841	5.352	2839.01	5.352	0.037		5.352	2269	5.352	2260.3	5.352	0.183		2.676	3	2.676	0	2.676	0		15.6408 20.259 0.000 20.3						5.352	0.2841			9.6408 45.866 0.005 45.9						5.352	0			2.4253 14.088 14.1						2.676	0
5.36	2762	5.36	2824.45	5.36	-1.188		5.36	2234	5.36	2238.63	5.36	-0.098		2.68	0	2.68	0	2.68	0		15.6641 20.109 0.000 20.1						5.36	0.2762			9.6552 45.674 0.005 45.7						5.36	0			2.4289 13.948 13.9						2.68	0
5.368	2842	5.368	2810.01	5.368	0.6		5.368	2193	5.368	2217.21	5.368	-0.517		2.684	6	2.684	0	2.684	0		15.6874 19.960 0.000 20.0						5.368	0.2842			9.6696 45.482 0.005 45.5						5.368	0			2.4325 13.810 13.8						2.684	0
5.376	2876	5.376	2795.67	5.376	1.498		5.376	2199	5.376	2196.04	5.376	0.063		2.688	3	2.688	0	2.688	0		15.7108 19.812 0.000 19.8						5.376	0.2876			9.6840 45.292 0.005 45.3						5.376	0			2.4361 13.672 13.7						2.688	0
5.384	2848	5.384	2781.45	5.384	1.247		5.384	2135	5.384	2175.1	5.384	-0.868		2.692	5	2.692	0	2.692	0		15.7341 19.665 0.000 19.7						5.384	0.2848			9.6984 45.102 0.005 45.1						5.384	0			2.4398 13.536 13.5						2.692	0
5.392	2763	5.392	2767.33	5.392	-0.082		5.392	2183	5.392	2154.41	5.392	0.612		2.696	5	2.696	0	2.696	0		15.7575 19.520 0.000 19.5						5.392	0.2763			9.7128 44.913 0.005 44.9						5.392	0			2.4434 13.401 13.4						2.696	0
5.4	2838	5.4	2753.32	5.4	1.589		5.4	2140	5.4	2133.95	5.4	0.131		2.7	1	2.7	0	2.7	0		15.7808 19.375 0.000 19.4						5.4	0.2838			9.7272 44.725 0.005 44.7						5.4	0			2.4470 13.268 13.3						2.7	0
5.408	2811	5.408	2739.42	5.408	1.35		5.408	2007	5.408	2113.72	5.408	-2.382		2.704	1	2.704	0	2.704	0		15.8042 19.232 0.000 19.2						5.408	0.2811			9.7416 44.538 0.004 44.5						5.408	0			2.4506 13.136 13.1						2.704	0
5.416	2733	5.416	2725.63	5.416	0.141		5.416	2069	5.416	2093.72	5.416	-0.543		2.708	3	2.708	0	2.708	0		15.8275 19.089 0.000 19.1						5.416	0.2733			9.7560 44.351 0.004 44.4						5.416	0			2.4542 13.005 13.0						2.708	0
5.424	2821	5.424	2711.94	5.424	2.053		5.424	2078	5.424	2073.95	5.424	0.089		2.712	4	2.712	0	2.712	0		15.8509 18.948 0.000 18.9						5.424	0.2821			9.7703 44.165 0.004 44.2						5.424	0			2.4579 12.876 12.9						2.712	0
5.432	2825	5.432	2698.35	5.432	2.383		5.432	2008	5.432	2054.4	5.432	-1.035		2.716	3	2.716	0	2.716	0		15.8742 18.807 0.000 18.8						5.432	0.2825			9.7847 43.980 0.004 44.0						5.432	0			2.4615 12.748 12.7						2.716	0
5.44	2687	5.44	2684.87	5.44	0.041		5.44	2011	5.44	2035.08	5.44	-0.537		2.72	6	2.72	0	2.72	0		15.8975 18.668 0.000 18.7						5.44	0.2687			9.7991 43.796 0.004 43.8						5.44	0			2.4651 12.621 12.6						2.72	0
5.448	2815	5.448	2671.49	5.448	2.705		5.448	1991	5.448	2015.97	5.448	-0.56		2.724	5	2.724	0	2.724	0		15.9209 18.530 0.000 18.5						5.448	0.2815			9.8135 43.613 0.004 43.6						5.448	0			2.4687 12.495 12.5						2.724	0
5.456	2730	5.456	2658.2	5.456	1.374		5.456	1921	5.456	1997.08	5.456	-1.736		2.728	4	2.728	0	2.728	0		15.9442 18.393 0.000 18.4						5.456	0.273			9.8279 43.430 0.004 43.4						5.456	0			2.4723 12.371 12.4						2.728	0
5.464	2663	5.464	2645.03	5.464	0.348		5.464	1842	5.464	1978.4	5.464	-3.178		2.732	6	2.732	0	2.732	0		15.9676 18.256 0.000 18.3						5.464	0.2663			9.8423 43.248 0.004 43.3						5.464	0			2.4760 12.248 12.2						2.732	0
5.472	2746	5.472	2631.94	5.472	2.177		5.472	1926	5.472	1959.94	5.472	-0.773		2.736	5	2.736	0	2.736	0		15.9909 18.121 0.000 18.1						5.472	0.2746			9.8567 43.067 0.004 43.1						5.472	0			2.4796 12.126 12.1						2.736	0
5.48	2596	5.48	2618.96	5.48	-0.451		5.48	1863	5.48	1941.68	5.48	-1.823		2.74	3	2.74	0	2.74	0		16.0143 17.987 0.000 18.0						5.48	0.2596			9.8711 42.887 0.004 42.9						5.48	0			2.4832 12.005 12.0						2.74	0
5.488	2639	5.488	2606.08	5.488	0.641		5.488	1868	5.488	1923.63	5.488	-1.287		2.744	1	2.744	0	2.744	0		16.0376 17.854 0.000 17.9						5.488	0.2639			9.8855 42.707 0.004 42.7						5.488	0			2.4868 11.886 11.9						2.744	0
5.496	2732	5.496	2593.29	5.496	2.654		5.496	1905	5.496	1905.79	5.496	-0.018		2.748	4	2.748	0	2.748	0		16.0610 17.721 0.000 17.7						5.496	0.2732			9.8998 42.528 0.004 42.5						5.496	0			2.4904 11.768 11.8						2.748	0
5.504	2567	5.504	2580.59	5.504	-0.268		5.504	1856	5.504	1888.14	5.504	-0.746		2.752	2	2.752	0	2.752	0		16.0843 17.590 0.000 17.6						5.504	0.2567			9.9142 42.350 0.003 42.4						5.504	0			2.4941 11.651 11.7						2.752	0
5.512	2655	5.512	2567.99	5.512	1.689		5.512	1803	5.512	1870.7	5.512	-1.594		2.756	5	2.756	0	2.756	0		16.1076 17.460 0.000 17.5						5.512	0.2655			9.9286 42.173 0.003 42.2						5.512	0			2.4977 11.535 11.5						2.756	0
5.52	2588	5.52	2555.49	5.52	0.639		5.52	1721	5.52	1853.45	5.52	-3.193		2.76	5	2.76	0	2.76	0		16.1310 17.331 0.000 17.3						5.52	0.2588			9.9430 41.996 0.003 42.0						5.52	0			2.5013 11.420 11.4						2.76	0
5.528	2693	5.528	2543.08	5.528	2.889		5.528	1840	5.528	1836.4	5.528	0.084		2.764	9	2.764	0	2.764	0		16.1543 17.202 0.000 17.2						5.528	0.2693			9.9574 41.820 0.003 41.8						5.528	0			2.5049 11.306 11.3						2.764	0
5.536	2628	5.536	2530.76	5.536	1.897		5.536	1909	5.536	1819.54	5.536	2.048		2.768	4	2.768	0	2.768	0		16.1777 17.075 0.000 17.1						5.536	0.2628			9.9718 41.645 0.003 41.6						5.536	0			2.5085 11.194 11.2						2.768	0
5.544	2606	5.544	2518.53	5.544	1.713		5.544	1803	5.544	1802.86	5.544	0.003		2.772	4	2.772	0	2.772	0		16.2010 16.948 0.000 16.9						5.544	0.2606			9.9862 41.470 0.003 41.5						5.544	0			2.5122 11.082 11.1						2.772	0
5.552	2600	5.552	2506.39	5.552	1.836		5.552	1786	5.552	1786.38	5.552	-0.009		2.776	4	2.776	0	2.776	0		16.2244 16.823 0.000 16.8						5.552	0.26			10.0006 41.297 0.003 41.3						5.552	0			2.5158 10.972 11.0						2.776	0
5.56	2573	5.56	2494.34	5.56	1.551		5.56	1749	5.56	1770.08	5.56	-0.504		2.78	6	2.78	0	2.78	0		16.2477 16.698 0.000 16.7						5.56	0.2573			10.0150 41.124 0.003 41.1						5.56	0			2.5194 10.863 10.9						2.78	0
5.568	2569	5.568	2482.38	5.568	1.709		5.568	1765	5.568	1753.97	5.568	0.263		2.784	6	2.784	0	2.784	0		16.2711 16.574 0.000 16.6						5.568	0.2569			10.0293 40.952 0.003 41.0						5.568	0			2.5230 10.755 10.8						2.784	0
5.576	2518	5.576	2470.51	5.576	0.946		5.576	1691	5.576	1738.03	5.576	-1.144		2.788	6	2.788	0	2.788	0		16.2944 16.452 0.000 16.5						5.576	0.2518			10.0437 40.780 0.003 40.8						5.576	0			2.5266 10.648 10.6						2.788	0
5.584	2565	5.584	2458.72	5.584	2.098		5.584	1703	5.584	1722.28	5.584	-0.467		2.792	6	2.792	0	2.792	0		16.3177 16.330 0.000 16.3						5.584	0.2565			10.0581 40.609 0.003 40.6						5.584	0			2.5303 10.542 10.5						2.792	0
5.592	2640	5.592	2447.02	5.592	3.756		5.592	1655	5.592	1706.7	5.592	-1.271		2.796	4	2.796	0	2.796	0		16.3411 16.209 0.000 16.2						5.592	0.264			10.0725 40.439 0.003 40.4						5.592	0			2.5339 10.437 10.4						2.796	0
5.6	2521	5.6	2435.41	5.6	1.705		5.6	1640	5.6	1691.3	5.6	-1.267		2.8	3	2.8	0	2.8	0		16.3644 16.089 0.000 16.1						5.6	0.2521			10.0869 40.270 0.003 40.3						5.6	0			2.5375 10.333 10.3						2.8	0
5.608	2427	5.608	2423.88	5.608	0.063		5.608	1679	5.608	1676.07	5.608	0.072		2.804	5	2.804	0	2.804	0		16.3878 15.970 0.000 16.0						5.608	0.2427			10.1013 40.101 0.003 40.1						5.608	0			2.5411 10.230 10.2						2.804	0
5.616	2464	5.616	2412.43	5.616	1.039		5.616	1738	5.616	1661.01	5.616	1.847		2.808	7	2.808	0	2.808	0		16.4111 15.851 0.000 15.9						5.616	0.2464			10.1157 39.933 0.003 39.9						5.616	0			2.5447 10.129 10.1						2.808	0
5.624	2445	5.624	2401.07	5.624	0.888		5.624	1579	5.624	1646.12	5.624	-1.689		2.812	6	2.812	0	2.812	0		16.4345 15.734 0.000 15.7						5.624	0.2445			10.1301 39.766 0.002 39.8						5.624	0			2.5484 10.028 10.0						2.812	0
5.632	2454	5.632	2389.79	5.632	1.296		5.632	1598	5.632	1631.39	5.632	-0.835		2.816	3	2.816	0	2.816	0		16.4578 15.617 0.000 15.6						5.632	0.2454			10.1445 39.599 0.002 39.6						5.632	0			2.5520 9.928 9.9						2.816	0
5.64	2394	5.64	2378.6	5.64	0.315		5.64	1630	5.64	1616.83	5.64	0.326		2.82	8	2.82	0	2.82	0		16.4812 15.502 0.000 15.5						5.64	0.2394			10.1589 39.433 0.002 39.4						5.64	0			2.5556 9.829 9.8						2.82	0
5.648	2456	5.648	2367.48	5.648	1.786		5.648	1539	5.648	1602.43	5.648	-1.617		2.824	3	2.824	0	2.824	0		16.5045 15.387 0.000 15.4						5.648	0.2456			10.1732 39.268 0.002 39.3						5.648	0			2.5592 9.731 9.7						2.824	0
5.656	2464	5.656	2356.44	5.656	2.167		5.656	1554	5.656	1588.2	5.656	-0.867		2.828	5	2.828	0	2.828	0		16.5278 15.273 0.000 15.3						5.656	0.2464			10.1876 39.104 0.002 39.1						5.656	0			2.5628 9.635 9.6						2.828	0
5.664	2461	5.664	2345.49	5.664	2.329		5.664	1516	5.664	1574.12	5.664	-1.493		2.832	5	2.832	0	2.832	0		16.5512 15.160 0.000 15.2						5.664	0.2461			10.2020 38.940 0.002 38.9						5.664	0			2.5665 9.539 9.5						2.832	0
5.672	2338	5.672	2334.61	5.672	0.07		5.672	1539	5.672	1560.2	5.672	-0.54		2.836	6	2.836	0	2.836	0		16.5745 15.047 0.000 15.0						5.672	0.2338			10.2164 38.777 0.002 38.8						5.672	0			2.5701 9.444 9.4						2.836	0
5.68	2406	5.68	2323.81	5.68	1.676		5.68	1531	5.68	1546.43	5.68	-0.394		2.84	4	2.84	0	2.84	0		16.5979 14.936 0.000 14.9						5.68	0.2406			10.2308 38.614 0.002 38.6						5.68	0			2.5737 9.350 9.3						2.84	0
5.688	2318	5.688	2313.08	5.688	0.102		5.688	1534	5.688	1532.82	5.688	0.03		2.844	2	2.844	0	2.844	0		16.6212 14.825 0.000 14.8						5.688	0.2318			10.2452 38.453 0.002 38.5						5.688	0			2.5773 9.257 9.3						2.844	0
5.696	2407	5.696	2302.44	5.696	2.131		5.696	1521	5.696	1519.36	5.696	0.042		2.848	5	2.848	0	2.848	0		16.6446 14.716 0.000 14.7						5.696	0.2407			10.2596 38.292 0.002 38.3						5.696	0			2.5809 9.165 9.2						2.848	0
5.704	2420	5.704	2291.86	5.704	2.605		5.704	1513	5.704	1506.05	5.704	0.179		2.852	7	2.852	0	2.852	0		16.6679 14.607 0.000 14.6						5.704	0.242			10.2740 38.131 0.002 38.1						5.704	0			2.5846 9.073 9.1						2.852	0
5.712	2365	5.712	2281.37	5.712	1.72		5.712	1538	5.712	1492.89	5.712	1.15		2.856	5	2.856	0	2.856	0		16.6913 14.498 0.000 14.5						5.712	0.2365			10.2884 37.972 0.002 38.0						5.712	0			2.5882 8.983 9.0						2.856	0
5.72	2380	5.72	2270.95	5.72	2.235		5.72	1469	5.72	1479.88	5.72	-0.284		2.86	5	2.86	0	2.86	0		16.7146 14.391 0.000 14.4						5.72	0.238			10.3027 37.813 0.002 37.8						5.72	0			2.5918 8.894 8.9						2.86	0
5.728	2390	5.728	2260.6	5.728	2.647		5.728	1441	5.728	1467.01	5.728	-0.685		2.864	4	2.864	0	2.864	0		16.7379 14.284 0.000 14.3						5.728	0.239			10.3171 37.654 0.002 37.7						5.728	0			2.5954 8.805 8.8						2.864	0
5.736	2238	5.736	2250.33	5.736	-0.261		5.736	1477	5.736	1454.28	5.736	0.591		2.868	3	2.868	0	2.868	0		16.7613 14.179 0.000 14.2						5.736	0.2238			10.3315 37.496 0.002 37.5						5.736	0			2.5990 8.718 8.7						2.868	0
5.744	2395	5.744	2240.12	5.744	3.165		5.744	1429	5.744	1441.69	5.744	-0.336		2.872	5	2.872	0	2.872	0		16.7846 14.074 0.000 14.1						5.744	0.2395			10.3459 37.339 0.002 37.3						5.744	0			2.6027 8.631 8.6						2.872	0
5.752	2395	5.752	2229.99	5.752	3.372		5.752	1402	5.752	1429.24	5.752	-0.728		2.876	6	2.876	0	2.876	0		16.8080 13.969 0.000 14.0						5.752	0.2395			10.3603 37.183 0.002 37.2						5.752	0			2.6063 8.545 8.5						2.876	0
5.76	2320	5.76	2219.94	5.76	2.077		5.76	1418	5.76	1416.93	5.76	0.028		2.88	5	2.88	0	2.88	0		16.8313 13.866 0.000 13.9						5.76	0.232			10.3747 37.027 0.002 37.0						5.76	0			2.6099 8.460 8.5						2.88	0
5.768	2350	5.768	2209.95	5.768	2.889		5.768	1386	5.768	1404.76	5.768	-0.504		2.884	4	2.884	0	2.884	0		16.8547 13.763 0.000 13.8						5.768	0.235			10.3891 36.872 0.002 36.9						5.768	0			2.6135 8.376 8.4						2.884	0
5.776	2281	5.776	2200.03	5.776	1.695		5.776	1427	5.776	1392.72	5.776	0.907		2.888	4	2.888	0	2.888	0		16.8780 13.661 0.000 13.7						5.776	0.2281			10.4035 36.718 0.002 36.7						5.776	0			2.6171 8.293 8.3						2.888	0
5.784	2291	5.784	2190.18	5.784	2.106		5.784	1299	5.784	1380.81	5.784	-2.27		2.892	5	2.892	0	2.892	0		16.9014 13.560 0.000 13.6						5.784	0.2291			10.4179 36.564 0.002 36.6						5.784	0			2.6208 8.210 8.2						2.892	0
5.792	2279	5.792	2180.4	5.792	2.065		5.792	1338	5.792	1369.04	5.792	-0.849		2.896	5	2.896	0	2.896	0		16.9247 13.460 0.000 13.5						5.792	0.2279			10.4323 36.411 0.002 36.4						5.792	0			2.6244 8.128 8.1						2.896	0
5.8	2215	5.8	2170.69	5.8	0.942		5.8	1314	5.8	1357.4	5.8	-1.197		2.9	5	2.9	0	2.9	0		16.9480 13.360 0.000 13.4						5.8	0.2215			10.4466 36.258 0.002 36.3						5.8	0			2.6280 8.047 8.0						2.9	0
5.808	2338	5.808	2161.04	5.808	3.66		5.808	1336	5.808	1345.88	5.808	-0.27		2.904	1	2.904	0	2.904	0		16.9714 13.261 0.000 13.3						5.808	0.2338			10.4610 36.106 0.002 36.1						5.808	0			2.6316 7.967 8.0						2.904	0
5.816	2264	5.816	2151.46	5.816	2.365		5.816	1277	5.816	1334.49	5.816	-1.609		2.908	6	2.908	0	2.908	0		16.9947 13.163 0.000 13.2						5.816	0.2264			10.4754 35.955 0.001 36.0						5.816	0			2.6352 7.888 7.9						2.908	0
5.824	2338	5.824	2141.95	5.824	4.055		5.824	1341	5.824	1323.23	5.824	0.485		2.912	3	2.912	0	2.912	0		17.0181 13.065 0.000 13.1						5.824	0.2338			10.4898 35.805 0.001 35.8						5.824	0			2.6389 7.810 7.8						2.912	0
5.832	2198	5.832	2132.51	5.832	1.397		5.832	1257	5.832	1312.09	5.832	-1.554		2.916	4	2.916	0	2.916	0		17.0414 12.968 0.000 13.0						5.832	0.2198			10.5042 35.655 0.001 35.7						5.832	0			2.6425 7.732 7.7						2.916	0
5.84	2166	5.84	2123.12	5.84	0.921		5.84	1258	5.84	1301.07	5.84	-1.214		2.92	7	2.92	0	2.92	0		17.0648 12.872 0.000 12.9						5.84	0.2166			10.5186 35.505 0.001 35.5						5.84	0			2.6461 7.655 7.7						2.92	0
5.848	2088	5.848	2113.81	5.848	-0.565		5.848	1229	5.848	1290.18	5.848	-1.745		2.924	5	2.924	0	2.924	0		17.0881 12.777 0.000 12.8						5.848	0.2088			10.5330 35.357 0.001 35.4						5.848	0			2.6497 7.579 7.6						2.924	0
5.856	2193	5.856	2104.55	5.856	1.889		5.856	1247	5.856	1279.4	5.856	-0.918		2.928	5	2.928	0	2.928	0		17.1114 12.682 0.000 12.7						5.856	0.2193			10.5474 35.208 0.001 35.2						5.856	0			2.6533 7.503 7.5						2.928	0
5.864	2097	5.864	2095.36	5.864	0.036		5.864	1254	5.864	1268.74	5.864	-0.416		2.932	5	2.932	0	2.932	0		17.1348 12.588 0.000 12.6						5.864	0.2097			10.5618 35.061 0.001 35.1						5.864	0			2.6570 7.429 7.4						2.932	0
5.872	2175	5.872	2086.24	5.872	1.903		5.872	1267	5.872	1258.2	5.872	0.247		2.936	2	2.936	0	2.936	0		17.1581 12.495 0.000 12.5						5.872	0.2175			10.5761 34.914 0.001 34.9						5.872	0			2.6606 7.355 7.4						2.936	0
5.88	2128	5.88	2077.17	5.88	1.102		5.88	1268	5.88	1247.78	5.88	0.568		2.94	4	2.94	0	2.94	0		17.1815 12.403 0.000 12.4						5.88	0.2128			10.5905 34.768 0.001 34.8						5.88	0			2.6642 7.282 7.3						2.94	0
5.888	2137	5.888	2068.17	5.888	1.489		5.888	1234	5.888	1237.46	5.888	-0.099		2.944	5	2.944	0	2.944	0		17.2048 12.311 0.000 12.3						5.888	0.2137			10.6049 34.622 0.001 34.6						5.888	0			2.6678 7.209 7.2						2.944	0
5.896	2164	5.896	2059.23	5.896	2.252		5.896	1204	5.896	1227.27	5.896	-0.671		2.948	3	2.948	0	2.948	0		17.2282 12.220 0.000 12.2						5.896	0.2164			10.6193 34.477 0.001 34.5						5.896	0			2.6714 7.137 7.1						2.948	0
5.904	2223	5.904	2050.35	5.904	3.662		5.904	1228	5.904	1217.18	5.904	0.309		2.952	2	2.952	0	2.952	0		17.2515 12.129 0.000 12.1						5.904	0.2223			10.6337 34.333 0.001 34.3						5.904	0			2.6751 7.066 7.1						2.952	0
5.912	2060	5.912	2041.53	5.912	0.407		5.912	1165	5.912	1207.2	5.912	-1.236		2.956	7	2.956	0	2.956	0		17.2749 12.039 0.000 12.0						5.912	0.206			10.6481 34.189 0.001 34.2						5.912	0			2.6787 6.996 7.0						2.956	0
5.92	2086	5.92	2032.76	5.92	1.166		5.92	1130	5.92	1197.34	5.92	-2.003		2.96	3	2.96	0	2.96	0		17.2982 11.950 0.000 12.0						5.92	0.2086			10.6625 34.046 0.001 34.0						5.92	0			2.6823 6.927 6.9						2.96	0
5.928	2082	5.928	2024.06	5.928	1.27		5.928	1180	5.928	1187.57	5.928	-0.221		2.964	3	2.964	0	2.964	0		17.3215 11.862 0.000 11.9						5.928	0.2082			10.6769 33.903 0.001 33.9						5.928	0			2.6859 6.858 6.9						2.964	0
5.936	2091	5.936	2015.42	5.936	1.653		5.936	1180	5.936	1177.92	5.936	0.061		2.968	3	2.968	0	2.968	0		17.3449 11.774 0.000 11.8						5.936	0.2091			10.6913 33.761 0.001 33.8						5.936	0			2.6895 6.789 6.8						2.968	0
5.944	2050	5.944	2006.83	5.944	0.953		5.944	1192	5.944	1168.37	5.944	0.684		2.972	2	2.972	0	2.972	0		17.3682 11.686 0.000 11.7						5.944	0.205			10.7056 33.620 0.001 33.6						5.944	0			2.6932 6.722 6.7						2.972	0
5.952	2057	5.952	1998.3	5.952	1.294		5.952	1135	5.952	1158.93	5.952	-0.71		2.976	0	2.976	0	2.976	0		17.3916 11.600 0.000 11.6						5.952	0.2057			10.7200 33.479 0.001 33.5						5.952	0			2.6968 6.655 6.7						2.976	0
5.96	2075	5.96	1989.83	5.96	1.87		5.96	1146	5.96	1149.58	5.96	-0.106		2.98	4	2.98	0	2.98	0		17.4149 11.514 0.000 11.5						5.96	0.2075			10.7344 33.339 0.001 33.3						5.96	0			2.7004 6.589 6.6						2.98	0
5.968	2101	5.968	1981.41	5.968	2.609		5.968	1133	5.968	1140.34	5.968	-0.218		2.984	5	2.984	0	2.984	0		17.4383 11.429 0.000 11.4						5.968	0.2101			10.7488 33.199 0.001 33.2						5.968	0			2.7040 6.523 6.5						2.984	0
5.976	2112	5.976	1973.05	5.976	3.024		5.976	1076	5.976	1131.2	5.976	-1.683		2.988	8	2.988	0	2.988	0		17.4616 11.344 0.000 11.3						5.976	0.2112			10.7632 33.060 0.001 33.1						5.976	0			2.7076 6.458 6.5						2.988	0
5.984	2056	5.984	1964.74	5.984	2.013		5.984	1106	5.984	1122.16	5.984	-0.486		2.992	4	2.992	0	2.992	0		17.4850 11.260 0.000 11.3						5.984	0.2056			10.7776 32.922 0.001 32.9						5.984	0			2.7113 6.394 6.4						2.992	0
5.992	1995	5.992	1956.49	5.992	0.862		5.992	1115	5.992	1113.22	5.992	0.053		2.996	3	2.996	0	2.996	0		17.5083 11.177 0.000 11.2						5.992	0.1995			10.7920 32.784 0.001 32.8						5.992	0			2.7149 6.330 6.3						2.996	0
6	1965	6	1948.3	6	0.377		6	1092	6	1104.37	6	-0.374		3	11	3	0	3	0		17.5316 11.094 0.000 11.1						6	0.1965			10.8064 32.646 0.001 32.6						6	0			2.7185 6.267 6.3						3	0
6.008	1997	6.008	1940.16	6.008	1.272		6.008	1134	6.008	1095.62	6.008	1.14		3.004	6	3.004	0	3.004	0		17.5550 11.012 0.000 11.0						6.008	0.1997			10.8208 32.510 0.001 32.5						6.008	0			2.7221 6.205 6.2						3.004	0
6.016	2000	6.016	1932.07	6.016	1.519		6.016	1096	6.016	1086.96	6.016	0.273		3.008	4	3.008	0	3.008	0		17.5783 10.930 0.000 10.9						6.016	0.2			10.8352 32.373 0.001 32.4						6.016	0			2.7257 6.143 6.1						3.008	0
6.024	2051	6.024	1924.03	6.024	2.804		6.024	995	6.024	1078.4	6.024	-2.641		3.012	7	3.012	0	3.012	0		17.6017 10.849 0.000 10.8						6.024	0.2051			10.8495 32.238 0.001 32.2						6.024	0			2.7294 6.082 6.1						3.012	0
6.032	2016	6.032	1916.05	6.032	2.226		6.032	1039	6.032	1069.93	6.032	-0.959		3.016	7	3.016	0	3.016	0		17.6250 10.769 0.000 10.8						6.032	0.2016			10.8639 32.103 0.001 32.1						6.032	0			2.7330 6.022 6.0						3.016	0
6.04	1968	6.04	1908.12	6.04	1.35		6.04	1045	6.04	1061.55	6.04	-0.512		3.02	1	3.02	0	3.02	0		17.6484 10.689 0.000 10.7						6.04	0.1968			10.8783 31.968 0.001 32.0						6.04	0			2.7366 5.962 6.0						3.02	0
6.048	1955	6.048	1900.24	6.048	1.238		6.048	1082	6.048	1053.26	6.048	0.874		3.024	3	3.024	0	3.024	0		17.6717 10.610 0.000 10.6						6.048	0.1955			10.8927 31.834 0.001 31.8						6.048	0			2.7402 5.902 5.9						3.024	0
6.056	2048	6.056	1892.41	6.056	3.438		6.056	1023	6.056	1045.06	6.056	-0.69		3.028	5	3.028	0	3.028	0		17.6951 10.531 0.000 10.5						6.056	0.2048			10.9071 31.701 0.001 31.7						6.056	0			2.7438 5.844 5.8						3.028	0
6.064	1980	6.064	1884.64	6.064	2.143		6.064	1031	6.064	1036.94	6.064	-0.185		3.032	3	3.032	0	3.032	0		17.7184 10.453 0.000 10.5						6.064	0.198			10.9215 31.568 0.001 31.6						6.064	0			2.7475 5.786 5.8						3.032	0
6.072	1943	6.072	1876.91	6.072	1.499		6.072	1029	6.072	1028.92	6.072	0.003		3.036	4	3.036	0	3.036	0		17.7417 10.376 0.000 10.4						6.072	0.1943			10.9359 31.436 0.001 31.4						6.072	0			2.7511 5.728 5.7						3.036	0
6.08	1957	6.08	1869.23	6.08	1.984		6.08	1011	6.08	1020.98	6.08	-0.314		3.04	5	3.04	0	3.04	0		17.7651 10.299 0.000 10.3						6.08	0.1957			10.9503 31.304 0.001 31.3						6.08	0			2.7547 5.671 5.7						3.04	0
6.088	1941	6.088	1861.61	6.088	1.802		6.088	993	6.088	1013.12	6.088	-0.638		3.044	6	3.044	0	3.044	0		17.7884 10.223 0.000 10.2						6.088	0.1941			10.9647 31.173 0.001 31.2						6.088	0			2.7583 5.615 5.6						3.044	0
6.096	1903	6.096	1854.03	6.096	1.123		6.096	988	6.096	1005.36	6.096	-0.552		3.048	4	3.048	0	3.048	0		17.8118 10.147 0.000 10.1						6.096	0.1903			10.9790 31.043 0.001 31.0						6.096	0			2.7619 5.559 5.6						3.048	0
6.104	1914	6.104	1846.5	6.104	1.543		6.104	1028	6.104	997.668	6.104	0.946		3.052	6	3.052	0	3.052	0		17.8351 10.072 0.000 10.1						6.104	0.1914			10.9934 30.913 0.001 30.9						6.104	0			2.7656 5.503 5.5						3.052	0
6.112	1872	6.112	1839.01	6.112	0.762		6.112	1027	6.112	990.062	6.112	1.153		3.056	5	3.056	0	3.056	0		17.8585 9.997 0.000 10.0						6.112	0.1872			11.0078 30.783 0.001 30.8						6.112	0			2.7692 5.449 5.4						3.056	0
6.12	1965	6.12	1831.58	6.12	3.01		6.12	973	6.12	982.538	6.12	-0.305		3.06	4	3.06	0	3.06	0		17.8818 9.923 0.000 9.9						6.12	0.1965			11.0222 30.654 0.001 30.7						6.12	0			2.7728 5.394 5.4						3.06	0
6.128	1954	6.128	1824.19	6.128	2.937		6.128	946	6.128	975.094	6.128	-0.945		3.064	5	3.064	0	3.064	0		17.9052 9.850 0.000 9.8						6.128	0.1954			11.0366 30.526 0.001 30.5						6.128	0			2.7764 5.341 5.3						3.064	0
6.136	1968	6.136	1816.85	6.136	3.407		6.136	936	6.136	967.73	6.136	-1.036		3.068	4	3.068	0	3.068	0		17.9285 9.777 0.000 9.8						6.136	0.1968			11.0510 30.398 0.001 30.4						6.136	0			2.7800 5.288 5.3						3.068	0
6.144	1772	6.144	1809.56	6.144	-0.892		6.144	938	6.144	960.443	6.144	-0.732		3.072	3	3.072	0	3.072	0		17.9518 9.704 0.000 9.7						6.144	0.1772			11.0654 30.271 0.001 30.3						6.144	0			2.7836 5.235 5.2						3.072	0
6.152	1863	6.152	1802.31	6.152	1.406		6.152	890	6.152	953.234	6.152	-2.117		3.076	3	3.076	0	3.076	0		17.9752 9.632 0.000 9.6						6.152	0.1863			11.0798 30.144 0.001 30.1						6.152	0			2.7873 5.183 5.2						3.076	0
6.16	1852	6.16	1795.11	6.16	1.322		6.16	913	6.16	946.102	6.16	-1.094		3.08	1	3.08	0	3.08	0		17.9985 9.561 0.000 9.6						6.16	0.1852			11.0942 30.018 0.001 30.0						6.16	0			2.7909 5.131 5.1						3.08	0
6.168	1882	6.168	1787.95	6.168	2.168		6.168	917	6.168	939.045	6.168	-0.727		3.084	2	3.084	0	3.084	0		18.0219 9.490 0.000 9.5						6.168	0.1882			11.1085 29.892 0.001 29.9						6.168	0			2.7945 5.080 5.1						3.084	0
6.176	1893	6.176	1780.84	6.176	2.578		6.176	891	6.176	932.063	6.176	-1.374		3.088	5	3.088	0	3.088	0		18.0452 9.420 0.000 9.4						6.176	0.1893			11.1229 29.767 0.001 29.8						6.176	0			2.7981 5.030 5.0						3.088	0
6.184	1844	6.184	1773.77	6.184	1.635		6.184	910	6.184	925.155	6.184	-0.502		3.092	4	3.092	0	3.092	0		18.0686 9.350 0.000 9.4						6.184	0.1844			11.1373 29.642 0.001 29.6						6.184	0			2.8017 4.980 5.0						3.092	0
6.192	1790	6.192	1766.75	6.192	0.55		6.192	930	6.192	918.32	6.192	0.383		3.096	4	3.096	0	3.096	0		18.0919 9.281 0.000 9.3						6.192	0.179			11.1517 29.518 0.001 29.5						6.192	0			2.8054 4.930 4.9						3.096	0
6.2	1925	6.2	1759.77	6.2	3.766		6.2	898	6.2	911.557	6.2	-0.452		3.1	5	3.1	0	3.1	0		18.1153 9.212 0.000 9.2						6.2	0.1925			11.1661 29.394 0.001 29.4						6.2	0			2.8090 4.881 4.9						3.1	0
6.208	1840	6.208	1752.83	6.208	2.032		6.208	876	6.208	904.865	6.208	-0.974		3.104	6	3.104	0	3.104	0		18.1386 9.144 0.000 9.1						6.208	0.184			11.1805 29.271 0.001 29.3						6.208	0			2.8126 4.832 4.8						3.104	0
6.216	1818	6.216	1745.94	6.216	1.69		6.216	862	6.216	898.244	6.216	-1.233		3.108	10	3.108	0	3.108	0		18.1619 9.076 0.000 9.1						6.216	0.1818			11.1949 29.149 0.001 29.1						6.216	0			2.8162 4.784 4.8						3.108	0
6.224	1830	6.224	1739.09	6.224	2.125		6.224	880	6.224	891.692	6.224	-0.394		3.112	4	3.112	0	3.112	0		18.1853 9.009 0.000 9.0						6.224	0.183			11.2093 29.026 0.000 29.0						6.224	0			2.8198 4.737 4.7						3.112	0
6.232	1812	6.232	1732.28	6.232	1.873		6.232	921	6.232	885.209	6.232	1.178		3.116	4	3.116	0	3.116	0		18.2086 8.942 0.000 8.9						6.232	0.1812			11.2237 28.905 0.000 28.9						6.232	0			2.8235 4.690 4.7						3.116	0
6.24	1802	6.24	1725.51	6.24	1.802		6.24	840	6.24	878.795	6.24	-1.337		3.12	5	3.12	0	3.12	0		18.2320 8.876 0.000 8.9						6.24	0.1802			11.2381 28.784 0.000 28.8						6.24	0			2.8271 4.643 4.6						3.12	0
6.248	1856	6.248	1718.79	6.248	3.185		6.248	902	6.248	872.447	6.248	0.983		3.124	0	3.124	0	3.124	0		18.2553 8.810 0.000 8.8						6.248	0.1856			11.2524 28.663 0.000 28.7						6.248	0			2.8307 4.597 4.6						3.124	0
6.256	1862	6.256	1712.11	6.256	3.474		6.256	873	6.256	866.166	6.256	0.231		3.128	4	3.128	0	3.128	0		18.2787 8.745 0.000 8.7						6.256	0.1862			11.2668 28.543 0.000 28.5						6.256	0			2.8343 4.551 4.6						3.128	0
6.264	1777	6.264	1705.46	6.264	1.697		6.264	801	6.264	859.951	6.264	-2.08		3.132	2	3.132	0	3.132	0		18.3020 8.680 0.000 8.7						6.264	0.1777			11.2812 28.424 0.000 28.4						6.264	0			2.8379 4.506 4.5						3.132	0
6.272	1752	6.272	1698.86	6.272	1.27		6.272	818	6.272	853.801	6.272	-1.25		3.136	5	3.136	0	3.136	0		18.3254 8.616 0.000 8.6						6.272	0.1752			11.2956 28.305 0.000 28.3						6.272	0			2.8416 4.461 4.5						3.136	0
6.28	1720	6.28	1692.3	6.28	0.668		6.28	810	6.28	847.715	6.28	-1.324		3.14	4	3.14	0	3.14	0		18.3487 8.552 0.000 8.6						6.28	0.172			11.3100 28.186 0.000 28.2						6.28	0			2.8452 4.417 4.4						3.14	0
6.288	1772	6.288	1685.78	6.288	2.048		6.288	841	6.288	841.692	6.288	-0.024		3.144	3	3.144	0	3.144	0		18.3720 8.489 0.000 8.5						6.288	0.1772			11.3244 28.068 0.000 28.1						6.288	0			2.8488 4.373 4.4						3.144	0
6.296	1646	6.296	1679.29	6.296	-0.821		6.296	802	6.296	835.732	6.296	-1.19		3.148	2	3.148	0	3.148	0		18.3954 8.426 0.000 8.4						6.296	0.1646			11.3388 27.950 0.000 28.0						6.296	0			2.8524 4.329 4.3						3.148	0
6.304	1812	6.304	1672.85	6.304	3.269		6.304	797	6.304	829.834	6.304	-1.162		3.152	10	3.152	0	3.152	0		18.4187 8.363 0.000 8.4						6.304	0.1812			11.3532 27.833 0.000 27.8						6.304	0			2.8560 4.286 4.3						3.152	0
6.312	1714	6.312	1666.44	6.312	1.149		6.312	837	6.312	823.997	6.312	0.449		3.156	4	3.156	0	3.156	0		18.4421 8.302 0.000 8.3						6.312	0.1714			11.3676 27.717 0.000 27.7						6.312	0			2.8597 4.243 4.2						3.156	0
6.32	1837	6.32	1660.08	6.32	4.128		6.32	866	6.32	818.221	6.32	1.622		3.16	2	3.16	0	3.16	0		18.4654 8.240 0.000 8.2						6.32	0.1837			11.3819 27.601 0.000 27.6						6.32	0			2.8633 4.201 4.2						3.16	0
6.328	1702	6.328	1653.75	6.328	1.17		6.328	771	6.328	812.505	6.328	-1.493		3.164	3	3.164	0	3.164	0		18.4888 8.179 0.000 8.2						6.328	0.1702			11.3963 27.485 0.000 27.5						6.328	0			2.8669 4.159 4.2						3.164	0
6.336	1699	6.336	1647.46	6.336	1.25		6.336	784	6.336	806.848	6.336	-0.815		3.168	2	3.168	0	3.168	0		18.5121 8.118 0.000 8.1						6.336	0.1699			11.4107 27.370 0.000 27.4						6.336	0			2.8705 4.118 4.1						3.168	0
6.344	1721	6.344	1641.21	6.344	1.923		6.344	747	6.344	801.249	6.344	-1.982		3.172	3	3.172	0	3.172	0		18.5355 8.058 0.000 8.1						6.344	0.1721			11.4251 27.255 0.000 27.3						6.344	0			2.8741 4.077 4.1						3.172	0
6.352	1744	6.352	1634.99	6.352	2.61		6.352	790	6.352	795.708	6.352	-0.203		3.176	3	3.176	0	3.176	0		18.5588 7.999 0.000 8.0						6.352	0.1744			11.4395 27.141 0.000 27.1						6.352	0			2.8778 4.036 4.0						3.176	0
6.36	1657	6.36	1628.81	6.36	0.692		6.36	796	6.36	790.224	6.36	0.204		3.18	8	3.18	0	3.18	0		18.5821 7.939 0.000 7.9						6.36	0.1657			11.4539 27.027 0.000 27.0						6.36	0			2.8814 3.996 4.0						3.18	0
6.368	1815	6.368	1622.67	6.368	4.514		6.368	714	6.368	784.797	6.368	-2.646		3.184	4	3.184	0	3.184	0		18.6055 7.881 0.000 7.9						6.368	0.1815			11.4683 26.914 0.000 26.9						6.368	0			2.8850 3.956 4.0						3.184	0
6.376	1733	6.376	1616.57	6.376	2.797		6.376	781	6.376	779.425	6.376	0.056		3.188	9	3.188	0	3.188	0		18.6288 7.822 0.000 7.8						6.376	0.1733			11.4827 26.801 0.000 26.8						6.376	0			2.8886 3.917 3.9						3.188	0
6.384	1678	6.384	1610.5	6.384	1.648		6.384	751	6.384	774.109	6.384	-0.842		3.192	4	3.192	0	3.192	0		18.6522 7.764 0.000 7.8						6.384	0.1678			11.4971 26.689 0.000 26.7						6.384	0			2.8922 3.878 3.9						3.192	0
6.392	1658	6.392	1604.46	6.392	1.315		6.392	719	6.392	768.847	6.392	-1.856		3.196	4	3.196	0	3.196	0		18.6755 7.707 0.000 7.7						6.392	0.1658			11.5114 26.577 0.000 26.6						6.392	0			2.8959 3.840 3.8						3.196	0
6.4	1642	6.4	1598.46	6.4	1.074		6.4	770	6.4	763.639	6.4	0.229		3.2	4	3.2	0	3.2	0		18.6989 7.650 0.000 7.6						6.4	0.1642			11.5258 26.466 0.000 26.5						6.4	0			2.8995 3.801 3.8						3.2	0
6.408	1660	6.408	1592.5	6.408	1.657		6.408	764	6.408	758.485	6.408	0.199		3.204	2	3.204	0	3.204	0		18.7222 7.593 0.000 7.6						6.408	0.166			11.5402 26.355 0.000 26.4						6.408	0			2.9031 3.764 3.8						3.204	0
6.416	1658	6.416	1586.57	6.416	1.754		6.416	783	6.416	753.383	6.416	1.057		3.208	2	3.208	0	3.208	0		18.7456 7.537 0.000 7.5						6.416	0.1658			11.5546 26.245 0.000 26.2						6.416	0			2.9067 3.726 3.7						3.208	0
6.424	1653	6.424	1580.68	6.424	1.779		6.424	766	6.424	748.333	6.424	0.638		3.212	4	3.212	0	3.212	0		18.7689 7.481 0.000 7.5						6.424	0.1653			11.5690 26.135 0.000 26.1						6.424	0			2.9103 3.689 3.7						3.212	0
6.432	1686	6.432	1574.82	6.432	2.708		6.432	713	6.432	743.334	6.432	-1.134		3.216	2	3.216	0	3.216	0		18.7922 7.425 0.000 7.4						6.432	0.1686			11.5834 26.025 0.000 26.0						6.432	0			2.9140 3.652 3.7						3.216	0
6.44	1656	6.44	1568.99	6.44	2.138		6.44	718	6.44	738.386	6.44	-0.76		3.22	3	3.22	0	3.22	0		18.8156 7.370 0.000 7.4						6.44	0.1656			11.5978 25.916 0.000 25.9						6.44	0			2.9176 3.616 3.6						3.22	0
6.448	1570	6.448	1563.2	6.448	0.172		6.448	671	6.448	733.489	6.448	-2.409		3.224	2	3.224	0	3.224	0		18.8389 7.316 0.000 7.3						6.448	0.157			11.6122 25.808 0.000 25.8						6.448	0			2.9212 3.580 3.6						3.224	0
6.456	1678	6.456	1557.44	6.456	2.943		6.456	719	6.456	728.641	6.456	-0.359		3.228	8	3.228	0	3.228	0		18.8623 7.262 0.000 7.3						6.456	0.1678			11.6266 25.700 0.000 25.7						6.456	0			2.9248 3.544 3.5						3.228	0
6.464	1643	6.464	1551.71	6.464	2.252		6.464	731	6.464	723.843	6.464	0.264		3.232	2	3.232	0	3.232	0		18.8856 7.208 0.000 7.2						6.464	0.1643			11.6410 25.592 0.000 25.6						6.464	0			2.9284 3.509 3.5						3.232	0
6.472	1652	6.472	1546.02	6.472	2.607		6.472	753	6.472	719.093	6.472	1.234		3.236	3	3.236	0	3.236	0		18.9090 7.155 0.000 7.2						6.472	0.1652			11.6553 25.485 0.000 25.5						6.472	0			2.9321 3.474 3.5						3.236	0
6.48	1635	6.48	1540.36	6.48	2.341		6.48	719	6.48	714.391	6.48	0.172		3.24	0	3.24	0	3.24	0		18.9323 7.102 0.000 7.1						6.48	0.1635			11.6697 25.378 0.000 25.4						6.48	0			2.9357 3.440 3.4						3.24	0
6.488	1540	6.488	1534.73	6.488	0.134		6.488	675	6.488	709.736	6.488	-1.335		3.244	1	3.244	0	3.244	0		18.9557 7.049 0.000 7.0						6.488	0.154			11.6841 25.272 0.000 25.3						6.488	0			2.9393 3.405 3.4						3.244	0
6.496	1572	6.496	1529.13	6.496	1.081		6.496	692	6.496	705.128	6.496	-0.498		3.248	1	3.248	0	3.248	0		18.9790 6.997 0.000 7.0						6.496	0.1572			11.6985 25.166 0.000 25.2						6.496	0			2.9429 3.371 3.4						3.248	0
6.504	1641	6.504	1523.57	6.504	2.899		6.504	664	6.504	700.567	6.504	-1.417		3.252	3	3.252	0	3.252	0		19.0023 6.945 0.000 6.9						6.504	0.1641			11.7129 25.061 0.000 25.1						6.504	0			2.9465 3.338 3.3						3.252	0
6.512	1546	6.512	1518.04	6.512	0.711		6.512	662	6.512	696.051	6.512	-1.321		3.256	5	3.256	0	3.256	0		19.0257 6.893 0.000 6.9						6.512	0.1546			11.7273 24.956 0.000 25.0						6.512	0			2.9502 3.305 3.3						3.256	0
6.52	1641	6.52	1512.54	6.52	3.171		6.52	661	6.52	691.581	6.52	-1.188		3.26	2	3.26	0	3.26	0		19.0490 6.842 0.000 6.8						6.52	0.1641			11.7417 24.851 0.000 24.9						6.52	0			2.9538 3.272 3.3						3.26	0
6.528	1599	6.528	1507.07	6.528	2.299		6.528	678	6.528	687.155	6.528	-0.351		3.264	3	3.264	0	3.264	0		19.0724 6.792 0.000 6.8						6.528	0.1599			11.7561 24.747 0.000 24.7						6.528	0			2.9574 3.239 3.2						3.264	0
6.536	1535	6.536	1501.62	6.536	0.852		6.536	679	6.536	682.774	6.536	-0.145		3.268	0	3.268	0	3.268	0		19.0957 6.741 0.000 6.7						6.536	0.1535			11.7705 24.643 0.000 24.6						6.536	0			2.9610 3.207 3.2						3.268	0
6.544	1591	6.544	1496.22	6.544	2.376		6.544	675	6.544	678.437	6.544	-0.132		3.272	8	3.272	0	3.272	0		19.1191 6.691 0.000 6.7						6.544	0.1591			11.7848 24.540 0.000 24.5						6.544	0			2.9646 3.175 3.2						3.272	0
6.552	1507	6.552	1490.84	6.552	0.416		6.552	649	6.552	674.142	6.552	-0.985		3.276	5	3.276	0	3.276	0		19.1424 6.642 0.000 6.6						6.552	0.1507			11.7992 24.437 0.000 24.4						6.552	0			2.9683 3.144 3.1						3.276	0
6.56	1565	6.56	1485.49	6.56	2.01		6.56	639	6.56	669.891	6.56	-1.22		3.28	5	3.28	0	3.28	0		19.1658 6.593 0.000 6.6						6.56	0.1565			11.8136 24.335 0.000 24.3						6.56	0			2.9719 3.112 3.1						3.28	0
6.568	1510	6.568	1480.17	6.568	0.768		6.568	703	6.568	665.682	6.568	1.405		3.284	4	3.284	0	3.284	0		19.1891 6.544 0.000 6.5						6.568	0.151			11.8280 24.233 0.000 24.2						6.568	0			2.9755 3.081 3.1						3.284	0
6.576	1490	6.576	1474.88	6.576	0.392		6.576	654	6.576	661.514	6.576	-0.293		3.288	3	3.288	0	3.288	0		19.2124 6.495 0.000 6.5						6.576	0.149			11.8424 24.132 0.000 24.1						6.576	0			2.9791 3.051 3.1						3.288	0
6.584	1533	6.584	1469.62	6.584	1.619		6.584	689	6.584	657.388	6.584	1.203		3.292	3	3.292	0	3.292	0		19.2358 6.447 0.000 6.4						6.584	0.1533			11.8568 24.031 0.000 24.0						6.584	0			2.9827 3.020 3.0						3.292	0
6.592	1539	6.592	1464.39	6.592	1.902		6.592	640	6.592	653.302	6.592	-0.525		3.296	3	3.296	0	3.296	0		19.2591 6.400 0.000 6.4						6.592	0.1539			11.8712 23.930 0.000 23.9						6.592	0			2.9864 2.990 3.0						3.296	0
6.6	1549	6.6	1459.18	6.6	2.282		6.6	636	6.6	649.257	6.6	-0.525		3.3	5	3.3	0	3.3	0		19.2825 6.352 0.000 6.4						6.6	0.1549			11.8856 23.830 0.000 23.8						6.6	0			2.9900 2.960 3.0						3.3	0
6.608	1557	6.608	1454.01	6.608	2.61		6.608	595	6.608	645.252	6.608	-2.057		3.304	7	3.304	0	3.304	0		19.3058 6.305 0.000 6.3						6.608	0.1557			11.9000 23.730 0.000 23.7						6.608	0			2.9936 2.931 2.9						3.304	0
6.616	1506	6.616	1448.87	6.616	1.472		6.616	627	6.616	641.286	6.616	-0.57		3.308	4	3.308	0	3.308	0		19.3292 6.258 0.000 6.3						6.616	0.1506			11.9143 23.630 0.000 23.6						6.616	0			2.9972 2.902 2.9						3.308	0
6.624	1536	6.624	1443.75	6.624	2.354		6.624	660	6.624	637.36	6.624	0.88		3.312	4	3.312	0	3.312	0		19.3525 6.212 0.000 6.2						6.624	0.1536			11.9287 23.531 0.000 23.5						6.624	0			3.0008 2.873 2.9						3.312	0
6.632	1521	6.632	1438.66	6.632	2.111		6.632	646	6.632	633.471	6.632	0.492		3.316	4	3.316	0	3.316	0		19.3759 6.166 0.000 6.2						6.632	0.1521			11.9431 23.433 0.000 23.4						6.632	0			3.0045 2.844 2.8						3.316	0
6.64	1461	6.64	1433.6	6.64	0.717		6.64	618	6.64	629.621	6.64	-0.467		3.32	8	3.32	0	3.32	0		19.3992 6.120 0.000 6.1						6.64	0.1461			11.9575 23.335 0.000 23.3						6.64	0			3.0081 2.816 2.8						3.32	0
6.648	1495	6.648	1428.56	6.648	1.718		6.648	617	6.648	625.809	6.648	-0.354		3.324	2	3.324	0	3.324	0		19.4225 6.075 0.000 6.1						6.648	0.1495			11.9719 23.237 0.000 23.2						6.648	0			3.0117 2.788 2.8						3.324	0
6.656	1509	6.656	1423.56	6.656	2.2		6.656	651	6.656	622.033	6.656	1.134		3.328	1	3.328	0	3.328	0		19.4459 6.030 0.000 6.0						6.656	0.1509			11.9863 23.140 0.000 23.1						6.656	0			3.0153 2.760 2.8						3.328	0
6.664	1473	6.664	1418.58	6.664	1.418		6.664	616	6.664	618.295	6.664	-0.092		3.332	0	3.332	0	3.332	0		19.4692 5.985 0.000 6.0						6.664	0.1473			12.0007 23.043 0.000 23.0						6.664	0			3.0189 2.733 2.7						3.332	0
6.672	1578	6.672	1413.62	6.672	4.138		6.672	592	6.672	614.593	6.672	-0.927		3.336	4	3.336	0	3.336	0		19.4926 5.941 0.000 5.9						6.672	0.1578			12.0151 22.946 0.000 22.9						6.672	0			3.0226 2.706 2.7						3.336	0
6.68	1506	6.68	1408.69	6.68	2.507		6.68	625	6.68	610.927	6.68	0.562		3.34	5	3.34	0	3.34	0		19.5159 5.897 0.000 5.9						6.68	0.1506			12.0295 22.850 0.000 22.9						6.68	0			3.0262 2.679 2.7						3.34	0
6.688	1372	6.688	1403.8	6.688	-0.858		6.688	647	6.688	607.296	6.688	1.559		3.344	3	3.344	0	3.344	0		19.5393 5.853 0.000 5.9						6.688	0.1372			12.0439 22.754 0.000 22.8						6.688	0			3.0298 2.652 2.7						3.344	0
6.696	1429	6.696	1398.92	6.696	0.796		6.696	606	6.696	603.701	6.696	0.093		3.348	5	3.348	0	3.348	0		19.5626 5.810 0.000 5.8						6.696	0.1429			12.0582 22.659 0.000 22.7						6.696	0			3.0334 2.626 2.6						3.348	0
6.704	1386	6.704	1394.07	6.704	-0.217		6.704	663	6.704	600.14	6.704	2.438		3.352	1	3.352	0	3.352	0		19.5860 5.767 0.000 5.8						6.704	0.1386			12.0726 22.564 0.000 22.6						6.704	0			3.0370 2.600 2.6						3.352	0
6.712	1444	6.712	1389.25	6.712	1.441		6.712	601	6.712	596.614	6.712	0.179		3.356	6	3.356	0	3.356	0		19.6093 5.724 0.000 5.7						6.712	0.1444			12.0870 22.470 0.000 22.5						6.712	0			3.0407 2.574 2.6						3.356	0
6.72	1485	6.72	1384.45	6.72	2.609		6.72	582	6.72	593.121	6.72	-0.46		3.36	1	3.36	0	3.36	0		19.6326 5.682 0.000 5.7						6.72	0.1485			12.1014 22.376 0.000 22.4						6.72	0			3.0443 2.548 2.5						3.36	0
6.728	1512	6.728	1379.68	6.728	3.403		6.728	629	6.728	589.663	6.728	1.566		3.364	3	3.364	0	3.364	0		19.6560 5.640 0.000 5.6						6.728	0.1512			12.1158 22.282 0.000 22.3						6.728	0			3.0479 2.523 2.5						3.364	0
6.736	1409	6.736	1374.94	6.736	0.907		6.736	561	6.736	586.237	6.736	-1.064		3.368	1	3.368	0	3.368	0		19.6793 5.598 0.000 5.6						6.736	0.1409			12.1302 22.189 0.000 22.2						6.736	0			3.0515 2.498 2.5						3.368	0
6.744	1393	6.744	1370.22	6.744	0.61		6.744	572	6.744	582.844	6.744	-0.453		3.372	5	3.372	0	3.372	0		19.7027 5.557 0.000 5.6						6.744	0.1393			12.1446 22.096 0.000 22.1						6.744	0			3.0551 2.473 2.5						3.372	0
6.752	1415	6.752	1365.52	6.752	1.315		6.752	550	6.752	579.484	6.752	-1.255		3.376	2	3.376	0	3.376	0		19.7260 5.515 0.000 5.5						6.752	0.1415			12.1590 22.003 0.000 22.0						6.752	0			3.0588 2.448 2.4						3.376	0
6.76	1469	6.76	1360.85	6.76	2.822		6.76	637	6.76	576.156	6.76	2.407		3.38	2	3.38	0	3.38	0		19.7494 5.474 0.000 5.5						6.76	0.1469			12.1734 21.911 0.000 21.9						6.76	0			3.0624 2.424 2.4						3.38	0
6.768	1453	6.768	1356.2	6.768	2.539		6.768	537	6.768	572.859	6.768	-1.545		3.384	3	3.384	0	3.384	0		19.7727 5.434 0.000 5.4						6.768	0.1453			12.1877 21.819 0.000 21.8						6.768	0			3.0660 2.400 2.4						3.384	0
6.776	1454	6.776	1351.58	6.776	2.686		6.776	570	6.776	569.594	6.776	0.017		3.388	6	3.388	0	3.388	0		19.7961 5.394 0.000 5.4						6.776	0.1454			12.2021 21.728 0.000 21.7						6.776	0			3.0696 2.376 2.4						3.388	0
6.784	1329	6.784	1346.98	6.784	-0.493		6.784	565	6.784	566.359	6.784	-0.057		3.392	2	3.392	0	3.392	0		19.8194 5.354 0.000 5.4						6.784	0.1329			12.2165 21.637 0.000 21.6						6.784	0			3.0732 2.352 2.4						3.392	0
6.792	1413	6.792	1342.4	6.792	1.878		6.792	526	6.792	563.156	6.792	-1.617		3.396	6	3.396	0	3.396	0		19.8427 5.314 0.000 5.3						6.792	0.1413			12.2309 21.546 0.000 21.5						6.792	0			3.0769 2.329 2.3						3.396	0
6.8	1434	6.8	1337.85	6.8	2.539		6.8	569	6.8	559.983	6.8	0.377		3.4	5	3.4	0	3.4	0		19.8661 5.275 0.000 5.3						6.8	0.1434			12.2453 21.456 0.000 21.5						6.8	0			3.0805 2.306 2.3						3.4	0
6.808	1444	6.808	1333.32	6.808	2.913		6.808	572	6.808	556.839	6.808	0.633		3.404	7	3.404	0	3.404	0		19.8894 5.236 0.000 5.2						6.808	0.1444			12.2597 21.366 0.000 21.4						6.808	0			3.0841 2.283 2.3						3.404	0
6.816	1402	6.816	1328.82	6.816	1.954		6.816	535	6.816	553.726	6.816	-0.808		3.408	8	3.408	0	3.408	0		19.9128 5.197 0.000 5.2						6.816	0.1402			12.2741 21.276 0.000 21.3						6.816	0			3.0877 2.260 2.3						3.408	0
6.824	1290	6.824	1324.34	6.824	-0.956		6.824	589	6.824	550.641	6.824	1.578		3.412	5	3.412	0	3.412	0		19.9361 5.158 0.000 5.2						6.824	0.129			12.2885 21.187 0.000 21.2						6.824	0			3.0913 2.237 2.2						3.412	0
6.832	1381	6.832	1319.88	6.832	1.645		6.832	525	6.832	547.586	6.832	-0.984		3.416	4	3.416	0	3.416	0		19.9595 5.120 0.000 5.1						6.832	0.1381			12.3029 21.099 0.000 21.1						6.832	0			3.0950 2.215 2.2						3.416	0
6.84	1373	6.84	1315.44	6.84	1.553		6.84	523	6.84	544.559	6.84	-0.941		3.42	2	3.42	0	3.42	0		19.9828 5.082 0.000 5.1						6.84	0.1373			12.3173 21.010 0.000 21.0						6.84	0			3.0986 2.193 2.2						3.42	0
6.848	1363	6.848	1311.03	6.848	1.408		6.848	538	6.848	541.56	6.848	-0.153		3.424	3	3.424	0	3.424	0		20.0062 5.045 0.000 5.0						6.848	0.1363			12.3316 20.922 0.000 20.9						6.848	0			3.1022 2.171 2.2						3.424	0
6.856	1355	6.856	1306.64	6.856	1.314		6.856	516	6.856	538.589	6.856	-0.993		3.428	3	3.428	0	3.428	0		20.0295 5.007 0.000 5.0						6.856	0.1355			12.3460 20.835 0.000 20.8						6.856	0			3.1058 2.150 2.1						3.428	0
6.864	1339	6.864	1302.27	6.864	1.004		6.864	554	6.864	535.646	6.864	0.778		3.432	5	3.432	0	3.432	0		20.0528 4.970 0.000 5.0						6.864	0.1339			12.3604 20.747 0.000 20.7						6.864	0			3.1094 2.128 2.1						3.432	0
6.872	1339	6.872	1297.92	6.872	1.123		6.872	507	6.872	532.731	6.872	-1.141		3.436	4	3.436	0	3.436	0		20.0762 4.933 0.000 4.9						6.872	0.1339			12.3748 20.660 0.000 20.7						6.872	0			3.1131 2.107 2.1						3.436	0
6.88	1324	6.88	1293.6	6.88	0.836		6.88	539	6.88	529.842	6.88	0.394		3.44	8	3.44	0	3.44	0		20.0995 4.897 0.000 4.9						6.88	0.1324			12.3892 20.574 0.000 20.6						6.88	0			3.1167 2.086 2.1						3.44	0
6.888	1303	6.888	1289.29	6.888	0.38		6.888	495	6.888	526.98	6.888	-1.435		3.444	3	3.444	0	3.444	0		20.1229 4.861 0.000 4.9						6.888	0.1303			12.4036 20.488 0.000 20.5						6.888	0			3.1203 2.065 2.1						3.444	0
6.896	1309	6.896	1285.01	6.896	0.663		6.896	527	6.896	524.145	6.896	0.124		3.448	5	3.448	0	3.448	0		20.1462 4.825 0.000 4.8						6.896	0.1309			12.4180 20.402 0.000 20.4						6.896	0			3.1239 2.045 2.0						3.448	0
6.904	1309	6.904	1280.75	6.904	0.781		6.904	538	6.904	521.336	6.904	0.717		3.452	6	3.452	0	3.452	0		20.1696 4.789 0.000 4.8						6.904	0.1309			12.4324 20.316 0.000 20.3						6.904	0			3.1275 2.025 2.0						3.452	0
6.912	1328	6.912	1276.51	6.912	1.413		6.912	508	6.912	518.552	6.912	-0.467		3.456	4	3.456	0	3.456	0		20.1929 4.753 0.000 4.8						6.912	0.1328			12.4468 20.231 0.000 20.2						6.912	0			3.1312 2.004 2.0						3.456	0
6.92	1439	6.92	1272.3	6.92	4.395		6.92	521	6.92	515.794	6.92	0.228		3.46	4	3.46	0	3.46	0		20.2163 4.718 0.000 4.7						6.92	0.1439			12.4611 20.147 0.000 20.1						6.92	0			3.1348 1.984 2.0						3.46	0
6.928	1297	6.928	1268.1	6.928	0.802		6.928	539	6.928	513.062	6.928	1.115		3.464	4	3.464	0	3.464	0		20.2396 4.683 0.000 4.7						6.928	0.1297			12.4755 20.062 0.000 20.1						6.928	0			3.1384 1.965 2.0						3.464	0
6.936	1336	6.936	1263.92	6.936	1.972		6.936	535	6.936	510.354	6.936	1.064		3.468	3	3.468	0	3.468	0		20.2629 4.648 0.000 4.6						6.936	0.1336			12.4899 19.978 0.000 20.0						6.936	0			3.1420 1.945 1.9						3.468	0
6.944	1275	6.944	1259.77	6.944	0.427		6.944	556	6.944	507.671	6.944	2.046		3.472	4	3.472	0	3.472	0		20.2863 4.614 0.000 4.6						6.944	0.1275			12.5043 19.895 0.000 19.9						6.944	0			3.1456 1.926 1.9						3.472	0
6.952	1305	6.952	1255.63	6.952	1.367		6.952	536	6.952	505.013	6.952	1.336		3.476	3	3.476	0	3.476	0		20.3096 4.580 0.000 4.6						6.952	0.1305			12.5187 19.811 0.000 19.8						6.952	0			3.1493 1.907 1.9						3.476	0
6.96	1225	6.96	1251.52	6.96	-0.758		6.96	503	6.96	502.378	6.96	0.028		3.48	1	3.48	0	3.48	0		20.3330 4.546 0.000 4.5						6.96	0.1225			12.5331 19.728 0.000 19.7						6.96	0			3.1529 1.888 1.9						3.48	0
6.968	1293	6.968	1247.42	6.968	1.267		6.968	508	6.968	499.768	6.968	0.365		3.484	3	3.484	0	3.484	0		20.3563 4.512 0.000 4.5						6.968	0.1293			12.5475 19.646 0.000 19.6						6.968	0			3.1565 1.869 1.9						3.484	0
6.976	1297	6.976	1243.35	6.976	1.49		6.976	494	6.976	497.181	6.976	-0.143		3.488	6	3.488	0	3.488	0		20.3797 4.479 0.000 4.5						6.976	0.1297			12.5619 19.563 0.000 19.6						6.976	0			3.1601 1.850 1.9						3.488	0
6.984	1271	6.984	1239.3	6.984	0.889		6.984	510	6.984	494.617	6.984	0.68		3.492	3	3.492	0	3.492	0		20.4030 4.446 0.000 4.4						6.984	0.1271			12.5763 19.481 0.000 19.5						6.984	0			3.1637 1.832 1.8						3.492	0
6.992	1256	6.992	1235.26	6.992	0.585		6.992	464	6.992	492.077	6.992	-1.301		3.496	2	3.496	0	3.496	0		20.4264 4.413 0.000 4.4						6.992	0.1256			12.5906 19.400 0.000 19.4						6.992	0			3.1674 1.814 1.8						3.496	0
7	1298	7	1231.24	7	1.853		7	476	7	489.559	7	-0.62		3.5	3	3.5	0	3.5	0		20.4497 4.380 0.000 4.4						7	0.1298			12.6050 19.319 0.000 19.3						7	0			3.1710 1.796 1.8						3.5	0
7.008	1325	7.008	1227.25	7.008	2.685		7.008	464	7.008	487.064	7.008	-1.068		3.504	0	3.504	0	3.504	0		20.4730 4.348 0.000 4.3						7.008	0.1325			12.6194 19.238 0.000 19.2						7.008	0			3.1746 1.778 1.8						3.504	0
7.016	1216	7.016	1223.27	7.016	-0.209		7.016	511	7.016	484.591	7.016	1.166		3.508	1	3.508	0	3.508	0		20.4964 4.315 0.000 4.3						7.016	0.1216			12.6338 19.157 0.000 19.2						7.016	0			3.1782 1.760 1.8						3.508	0
7.024	1231	7.024	1219.32	7.024	0.333		7.024	494	7.024	482.14	7.024	0.533		3.512	1	3.512	0	3.512	0		20.5197 4.283 0.000 4.3						7.024	0.1231			12.6482 19.077 0.000 19.1						7.024	0			3.1818 1.743 1.7						3.512	0
7.032	1337	7.032	1215.38	7.032	3.326		7.032	481	7.032	479.711	7.032	0.059		3.516	3	3.516	0	3.516	0		20.5431 4.252 0.000 4.3						7.032	0.1337			12.6626 18.997 0.000 19.0						7.032	0			3.1855 1.725 1.7						3.516	0
7.04	1307	7.04	1211.46	7.04	2.643		7.04	464	7.04	477.304	7.04	-0.616		3.52	6	3.52	0	3.52	0		20.5664 4.220 0.000 4.2						7.04	0.1307			12.6770 18.917 0.000 18.9						7.04	0			3.1891 1.708 1.7						3.52	0
7.048	1263	7.048	1207.56	7.048	1.56		7.048	481	7.048	474.918	7.048	0.277		3.524	3	3.524	0	3.524	0		20.5898 4.189 0.000 4.2						7.048	0.1263			12.6914 18.838 0.000 18.8						7.048	0			3.1927 1.691 1.7						3.524	0
7.056	1237	7.056	1203.67	7.056	0.948		7.056	493	7.056	472.553	7.056	0.919		3.528	1	3.528	0	3.528	0		20.6131 4.158 0.000 4.2						7.056	0.1237			12.7058 18.759 0.000 18.8						7.056	0			3.1963 1.674 1.7						3.528	0
7.064	1286	7.064	1199.81	7.064	2.403		7.064	478	7.064	470.209	7.064	0.356		3.532	3	3.532	0	3.532	0		20.6365 4.127 0.000 4.1						7.064	0.1286			12.7202 18.681 0.000 18.7						7.064	0			3.1999 1.658 1.7						3.532	0
7.072	1247	7.072	1195.96	7.072	1.445		7.072	468	7.072	467.886	7.072	0.005		3.536	0	3.536	0	3.536	0		20.6598 4.097 0.000 4.1						7.072	0.1247			12.7345 18.602 0.000 18.6						7.072	0			3.2036 1.641 1.6						3.536	0
7.08	1177	7.08	1192.14	7.08	-0.441		7.08	472	7.08	465.583	7.08	0.295		3.54	6	3.54	0	3.54	0		20.6831 4.066 0.000 4.1						7.08	0.1177			12.7489 18.524 0.000 18.5						7.08	0			3.2072 1.625 1.6						3.54	0
7.088	1245	7.088	1188.33	7.088	1.606		7.088	475	7.088	463.3	7.088	0.536		3.544	4	3.544	0	3.544	0		20.7065 4.036 0.000 4.0						7.088	0.1245			12.7633 18.447 0.000 18.4						7.088	0			3.2108 1.609 1.6						3.544	0
7.096	1274	7.096	1184.54	7.096	2.506		7.096	479	7.096	461.037	7.096	0.819		3.548	2	3.548	0	3.548	0		20.7298 4.006 0.000 4.0						7.096	0.1274			12.7777 18.370 0.000 18.4						7.096	0			3.2144 1.593 1.6						3.548	0
7.104	1252	7.104	1180.76	7.104	2.013		7.104	477	7.104	458.794	7.104	0.832		3.552	4	3.552	0	3.552	0		20.7532 3.977 0.000 4.0						7.104	0.1252			12.7921 18.293 0.000 18.3						7.104	0			3.2180 1.577 1.6						3.552	0
7.112	1226	7.112	1177.01	7.112	1.399		7.112	475	7.112	456.57	7.112	0.844		3.556	6	3.556	0	3.556	0		20.7765 3.947 0.000 3.9						7.112	0.1226			12.8065 18.216 0.000 18.2						7.112	0			3.2216 1.561 1.6						3.556	0
7.12	1248	7.12	1173.27	7.12	2.115		7.12	433	7.12	454.366	7.12	-1.024		3.56	8	3.56	0	3.56	0		20.7999 3.918 0.000 3.9						7.12	0.1248			12.8209 18.140 0.000 18.1						7.12	0			3.2253 1.546 1.5						3.56	0
7.128	1218	7.128	1169.55	7.128	1.388		7.128	460	7.128	452.181	7.128	0.364		3.564	3	3.564	0	3.564	0		20.8232 3.889 0.000 3.9						7.128	0.1218			12.8353 18.064 0.000 18.1						7.128	0			3.2289 1.530 1.5						3.564	0
7.136	1230	7.136	1165.85	7.136	1.829		7.136	446	7.136	450.015	7.136	-0.19		3.568	1	3.568	0	3.568	0		20.8466 3.860 0.000 3.9						7.136	0.123			12.8497 17.988 0.000 18.0						7.136	0			3.2325 1.515 1.5						3.568	0
7.144	1212	7.144	1162.16	7.144	1.432		7.144	491	7.144	447.867	7.144	1.943		3.572	1	3.572	0	3.572	0		20.8699 3.831 0.000 3.8						7.144	0.1212			12.8640 17.913 0.000 17.9						7.144	0			3.2361 1.500 1.5						3.572	0
7.152	1272	7.152	1158.49	7.152	3.183		7.152	478	7.152	445.738	7.152	1.473		3.576	5	3.576	0	3.576	0		20.8932 3.803 0.000 3.8						7.152	0.1272			12.8784 17.838 0.000 17.8						7.152	0			3.2397 1.485 1.5						3.576	0
7.16	1208	7.16	1154.84	7.16	1.53		7.16	420	7.16	443.627	7.16	-1.15		3.58	2	3.58	0	3.58	0		20.9166 3.775 0.000 3.8						7.16	0.1208			12.8928 17.763 0.000 17.8						7.16	0			3.2434 1.470 1.5						3.58	0
7.168	1193	7.168	1151.2	7.168	1.21		7.168	463	7.168	441.534	7.168	0.995		3.584	5	3.584	0	3.584	0		20.9399 3.747 0.000 3.7						7.168	0.1193			12.9072 17.689 0.000 17.7						7.168	0			3.2470 1.456 1.5						3.584	0
7.176	1176	7.176	1147.58	7.176	0.829		7.176	412	7.176	439.459	7.176	-1.35		3.588	3	3.588	0	3.588	0		20.9633 3.719 0.000 3.7						7.176	0.1176			12.9216 17.614 0.000 17.6						7.176	0			3.2506 1.441 1.4						3.588	0
7.184	1223	7.184	1143.98	7.184	2.26		7.184	440	7.184	437.401	7.184	0.124		3.592	6	3.592	0	3.592	0		20.9866 3.692 0.000 3.7						7.184	0.1223			12.9360 17.541 0.000 17.5						7.184	0			3.2542 1.427 1.4						3.592	0
7.192	1155	7.192	1140.39	7.192	0.43		7.192	453	7.192	435.361	7.192	0.827		3.596	4	3.596	0	3.596	0		21.0100 3.664 0.000 3.7						7.192	0.1155			12.9504 17.467 0.000 17.5						7.192	0			3.2578 1.412 1.4						3.596	0
7.2	1152	7.2	1136.83	7.2	0.447		7.2	409	7.2	433.339	7.2	-1.201		3.6	3	3.6	0	3.6	0		21.0333 3.637 0.000 3.6						7.2	0.1152			12.9648 17.394 0.000 17.4						7.2	0			3.2615 1.398 1.4						3.6	0
7.208	1124	7.208	1133.27	7.208	-0.277		7.208	452	7.208	431.333	7.208	0.97		3.604	3	3.604	0	3.604	0		21.0567 3.610 0.000 3.6						7.208	0.1124			12.9792 17.321 0.000 17.3						7.208	0			3.2651 1.385 1.4						3.604	0
7.216	1185	7.216	1129.73	7.216	1.605		7.216	464	7.216	429.344	7.216	1.605		3.608	3	3.608	0	3.608	0		21.0800 3.583 0.000 3.6						7.216	0.1185			12.9935 17.249 0.000 17.2						7.216	0			3.2687 1.371 1.4						3.608	0
7.224	1179	7.224	1126.21	7.224	1.537		7.224	475	7.224	427.372	7.224	2.181		3.612	4	3.612	0	3.612	0		21.1033 3.557 0.000 3.6						7.224	0.1179			13.0079 17.176 0.000 17.2						7.224	0			3.2723 1.357 1.4						3.612	0
7.232	1157	7.232	1122.71	7.232	1.008		7.232	437	7.232	425.417	7.232	0.553		3.616	5	3.616	0	3.616	0		21.1267 3.531 0.000 3.5						7.232	0.1157			13.0223 17.104 0.000 17.1						7.232	0			3.2759 1.344 1.3						3.616	0
7.24	1151	7.24	1119.22	7.24	0.937		7.24	458	7.24	423.478	7.24	1.61		3.62	6	3.62	0	3.62	0		21.1500 3.504 0.000 3.5						7.24	0.1151			13.0367 17.033 0.000 17.0						7.24	0			3.2796 1.330 1.3						3.62	0
7.248	1146	7.248	1115.74	7.248	0.894		7.248	448	7.248	421.555	7.248	1.247		3.624	4	3.624	0	3.624	0		21.1734 3.478 0.000 3.5						7.248	0.1146			13.0511 16.961 0.000 17.0						7.248	0			3.2832 1.317 1.3						3.624	0
7.256	1182	7.256	1112.29	7.256	2.028		7.256	454	7.256	419.648	7.256	1.609		3.628	3	3.628	0	3.628	0		21.1967 3.453 0.000 3.5						7.256	0.1182			13.0655 16.890 0.000 16.9						7.256	0			3.2868 1.304 1.3						3.628	0
7.264	1134	7.264	1108.84	7.264	0.747		7.264	424	7.264	417.757	7.264	0.302		3.632	6	3.632	0	3.632	0		21.2201 3.427 0.000 3.4						7.264	0.1134			13.0799 16.820 0.000 16.8						7.264	0			3.2904 1.291 1.3						3.632	0
7.272	1198	7.272	1105.41	7.272	2.675		7.272	420	7.272	415.881	7.272	0.201		3.636	5	3.636	0	3.636	0		21.2434 3.402 0.000 3.4						7.272	0.1198			13.0943 16.749 0.000 16.7						7.272	0			3.2940 1.278 1.3						3.636	0
7.28	1094	7.28	1102	7.28	-0.242		7.28	439	7.28	414.021	7.28	1.189		3.64	3	3.64	0	3.64	0		21.2668 3.377 0.000 3.4						7.28	0.1094			13.1087 16.679 0.000 16.7						7.28	0			3.2977 1.265 1.3						3.64	0
7.288	1135	7.288	1098.6	7.288	1.08		7.288	414	7.288	412.176	7.288	0.089		3.644	2	3.644	0	3.644	0		21.2901 3.352 0.000 3.4						7.288	0.1135			13.1231 16.609 0.000 16.6						7.288	0			3.3013 1.253 1.3						3.644	0
7.296	1155	7.296	1095.22	7.296	1.759		7.296	430	7.296	410.347	7.296	0.946		3.648	6	3.648	0	3.648	0		21.3134 3.327 0.000 3.3						7.296	0.1155			13.1374 16.540 0.000 16.5						7.296	0			3.3049 1.240 1.2						3.648	0
7.304	1143	7.304	1091.86	7.304	1.513		7.304	405	7.304	408.532	7.304	-0.175		3.652	2	3.652	0	3.652	0		21.3368 3.302 0.000 3.3						7.304	0.1143			13.1518 16.470 0.000 16.5						7.304	0			3.3085 1.228 1.2						3.652	0
7.312	1093	7.312	1088.5	7.312	0.136		7.312	417	7.312	406.732	7.312	0.502		3.656	4	3.656	0	3.656	0		21.3601 3.278 0.000 3.3						7.312	0.1093			13.1662 16.401 0.000 16.4						7.312	0			3.3121 1.216 1.2						3.656	0
7.32	1022	7.32	1085.16	7.32	-1.976		7.32	381	7.32	404.947	7.32	-1.224		3.66	9	3.66	0	3.66	0		21.3835 3.253 0.000 3.3						7.32	0.1022			13.1806 16.333 0.000 16.3						7.32	0			3.3158 1.204 1.2						3.66	0
7.328	1141	7.328	1081.84	7.328	1.751		7.328	445	7.328	403.176	7.328	1.978		3.664	9	3.664	0	3.664	0		21.4068 3.229 0.000 3.2						7.328	0.1141			13.1950 16.264 0.000 16.3						7.328	0			3.3194 1.192 1.2						3.664	0
7.336	1116	7.336	1078.53	7.336	1.122		7.336	421	7.336	401.42	7.336	0.952		3.668	3	3.668	0	3.668	0		21.4302 3.205 0.000 3.2						7.336	0.1116			13.2094 16.196 0.000 16.2						7.336	0			3.3230 1.180 1.2						3.668	0
7.344	1085	7.344	1075.24	7.344	0.296		7.344	408	7.344	399.678	7.344	0.411		3.672	5	3.672	0	3.672	0		21.4535 3.182 0.000 3.2						7.344	0.1085			13.2238 16.128 0.000 16.1						7.344	0			3.3266 1.168 1.2						3.672	0
7.352	1110	7.352	1071.96	7.352	1.142		7.352	377	7.352	397.949	7.352	-1.076		3.676	5	3.676	0	3.676	0		21.4769 3.158 0.000 3.2						7.352	0.111			13.2382 16.061 0.000 16.1						7.352	0			3.3302 1.156 1.2						3.676	0
7.36	1082	7.36	1068.69	7.36	0.405		7.36	394	7.36	396.235	7.36	-0.112		3.68	3	3.68	0	3.68	0		21.5002 3.135 0.000 3.1						7.36	0.1082			13.2526 15.993 0.000 16.0						7.36	0			3.3339 1.145 1.1						3.68	0
7.368	1050	7.368	1065.44	7.368	-0.476		7.368	387	7.368	394.534	7.368	-0.382		3.684	10	3.684	0	3.684	0		21.5235 3.111 0.000 3.1						7.368	0.105			13.2669 15.927 0.000 15.9						7.368	0			3.3375 1.134 1.1						3.684	0
7.376	1080	7.376	1062.2	7.376	0.542		7.376	413	7.376	392.847	7.376	0.989		3.688	8	3.688	0	3.688	0		21.5469 3.088 0.000 3.1						7.376	0.108			13.2813 15.860 0.000 15.9						7.376	0			3.3411 1.122 1.1						3.688	0
7.384	1076	7.384	1058.98	7.384	0.519		7.384	420	7.384	391.174	7.384	1.403		3.692	6	3.692	0	3.692	0		21.5702 3.065 0.000 3.1						7.384	0.1076			13.2957 15.793 0.000 15.8						7.384	0			3.3447 1.111 1.1						3.692	0
7.392	1079	7.392	1055.77	7.392	0.707		7.392	398	7.392	389.514	7.392	0.424		3.696	6	3.696	0	3.696	0		21.5936 3.043 0.000 3.0						7.392	0.1079			13.3101 15.727 0.000 15.7						7.392	0			3.3483 1.100 1.1						3.696	0
7.4	1052	7.4	1052.57	7.4	-0.018		7.4	407	7.4	387.866	7.4	0.946		3.7	4	3.7	0	3.7	0		21.6169 3.020 0.000 3.0						7.4	0.1052			13.3245 15.661 0.000 15.7						7.4	0			3.3520 1.089 1.1						3.7	0
7.408	1051	7.408	1049.39	7.408	0.05		7.408	401	7.408	386.232	7.408	0.736		3.704	5	3.704	0	3.704	0		21.6403 2.998 0.000 3.0						7.408	0.1051			13.3389 15.596 0.000 15.6						7.408	0			3.3556 1.078 1.1						3.704	0
7.416	1039	7.416	1046.22	7.416	-0.224		7.416	399	7.416	384.611	7.416	0.719		3.708	4	3.708	0	3.708	0		21.6636 2.976 0.000 3.0						7.416	0.1039			13.3533 15.530 0.000 15.5						7.416	0			3.3592 1.068 1.1						3.708	0
7.424	1079	7.424	1043.07	7.424	1.094		7.424	392	7.424	383.002	7.424	0.453		3.712	3	3.712	0	3.712	0		21.6870 2.954 0.000 3.0						7.424	0.1079			13.3677 15.465 0.000 15.5						7.424	0			3.3628 1.057 1.1						3.712	0
7.432	1046	7.432	1039.92	7.432	0.188		7.432	395	7.432	381.406	7.432	0.682		3.716	4	3.716	0	3.716	0		21.7103 2.932 0.000 2.9						7.432	0.1046			13.3821 15.401 0.000 15.4						7.432	0			3.3664 1.046 1.0						3.716	0
7.44	1043	7.44	1036.8	7.44	0.192		7.44	342	7.44	379.823	7.44	-2.039		3.72	3	3.72	0	3.72	0		21.7336 2.910 0.000 2.9						7.44	0.1043			13.3964 15.336 0.000 15.3						7.44	0			3.3701 1.036 1.0						3.72	0
7.448	1103	7.448	1033.68	7.448	2.087		7.448	375	7.448	378.251	7.448	-0.167		3.724	7	3.724	0	3.724	0		21.7570 2.888 0.000 2.9						7.448	0.1103			13.4108 15.272 0.000 15.3						7.448	0			3.3737 1.026 1.0						3.724	0
7.456	1074	7.456	1030.58	7.456	1.325		7.456	359	7.456	376.692	7.456	-0.931		3.728	6	3.728	0	3.728	0		21.7803 2.867 0.000 2.9						7.456	0.1074			13.4252 15.208 0.000 15.2						7.456	0			3.3773 1.015 1.0						3.728	0
7.464	1080	7.464	1027.49	7.464	1.598		7.464	389	7.464	375.145	7.464	0.701		3.732	7	3.732	0	3.732	0		21.8037 2.846 0.000 2.8						7.464	0.108			13.4396 15.144 0.000 15.1						7.464	0			3.3809 1.005 1.0						3.732	0
7.472	1095	7.472	1024.41	7.472	2.133		7.472	393	7.472	373.61	7.472	0.976		3.736	4	3.736	0	3.736	0		21.8270 2.825 0.000 2.8						7.472	0.1095			13.4540 15.081 0.000 15.1						7.472	0			3.3845 0.995 1.0						3.736	0
7.48	1033	7.48	1021.35	7.48	0.363		7.48	377	7.48	372.087	7.48	0.252		3.74	6	3.74	0	3.74	0		21.8504 2.804 0.000 2.8						7.48	0.1033			13.4684 15.018 0.000 15.0						7.48	0			3.3882 0.985 1.0						3.74	0
7.488	1043	7.488	1018.3	7.488	0.765		7.488	382	7.488	370.575	7.488	0.583		3.744	4	3.744	0	3.744	0		21.8737 2.783 0.000 2.8						7.488	0.1043			13.4828 14.955 0.000 15.0						7.488	0			3.3918 0.976 1.0						3.744	0
7.496	1013	7.496	1015.26	7.496	-0.071		7.496	354	7.496	369.075	7.496	-0.799		3.748	4	3.748	0	3.748	0		21.8971 2.762 0.000 2.8						7.496	0.1013			13.4972 14.892 0.000 14.9						7.496	0			3.3954 0.966 1.0						3.748	0
7.504	994	7.504	1012.23	7.504	-0.578		7.504	374	7.504	367.586	7.504	0.331		3.752	8	3.752	0	3.752	0		21.9204 2.742 0.000 2.7						7.504	0.0994			13.5116 14.830 0.000 14.8						7.504	0			3.3990 0.956 1.0						3.752	0
7.512	1021	7.512	1009.22	7.512	0.369		7.512	391	7.512	366.109	7.512	1.256		3.756	6	3.756	0	3.756	0		21.9437 2.722 0.000 2.7						7.512	0.1021			13.5260 14.768 0.000 14.8						7.512	0			3.4026 0.947 0.9						3.756	0
7.52	1066	7.52	1006.22	7.52	1.831		7.52	391	7.52	364.643	7.52	1.33		3.76	5	3.76	0	3.76	0		21.9671 2.702 0.000 2.7						7.52	0.1066			13.5403 14.706 0.000 14.7						7.52	0			3.4063 0.937 0.9						3.76	0
7.528	1042	7.528	1003.23	7.528	1.201		7.528	367	7.528	363.188	7.528	0.198		3.764	6	3.764	0	3.764	0		21.9904 2.681 0.000 2.7						7.528	0.1042			13.5547 14.644 0.000 14.6						7.528	0			3.4099 0.928 0.9						3.764	0
7.536	1025	7.536	1000.25	7.536	0.773		7.536	354	7.536	361.744	7.536	-0.41		3.768	8	3.768	0	3.768	0		22.0138 2.662 0.000 2.7						7.536	0.1025			13.5691 14.583 0.000 14.6						7.536	0			3.4135 0.919 0.9						3.768	0
7.544	1007	7.544	997.292	7.544	0.306		7.544	392	7.544	360.31	7.544	1.597		3.772	2	3.772	0	3.772	0		22.0371 2.642 0.000 2.6						7.544	0.1007			13.5835 14.522 0.000 14.5						7.544	0			3.4171 0.910 0.9						3.772	0
7.552	984	7.552	994.34	7.552	-0.329		7.552	346	7.552	358.888	7.552	-0.691		3.776	6	3.776	0	3.776	0		22.0605 2.622 0.000 2.6						7.552	0.0984			13.5979 14.461 0.000 14.5						7.552	0			3.4207 0.901 0.9						3.776	0
7.56	1048	7.56	991.401	7.56	1.748		7.56	332	7.56	357.476	7.56	-1.394		3.78	9	3.78	0	3.78	0		22.0838 2.603 0.000 2.6						7.56	0.1048			13.6123 14.400 0.000 14.4						7.56	0			3.4244 0.892 0.9						3.78	0
7.568	1011	7.568	988.474	7.568	0.708		7.568	355	7.568	356.074	7.568	-0.057		3.784	10	3.784	0	3.784	0		22.1072 2.584 0.000 2.6						7.568	0.1011			13.6267 14.340 0.000 14.3						7.568	0			3.4280 0.883 0.9						3.784	0
7.576	1007	7.576	985.558	7.576	0.676		7.576	336	7.576	354.683	7.576	-1.016		3.788	3	3.788	0	3.788	0		22.1305 2.565 0.000 2.6						7.576	0.1007			13.6411 14.280 0.000 14.3						7.576	0			3.4316 0.874 0.9						3.788	0
7.584	962	7.584	982.654	7.584	-0.665		7.584	363	7.584	353.302	7.584	0.508		3.792	10	3.792	0	3.792	0		22.1538 2.546 0.000 2.5						7.584	0.0962			13.6555 14.220 0.000 14.2						7.584	0			3.4352 0.865 0.9						3.792	0
7.592	995	7.592	979.762	7.592	0.483		7.592	355	7.592	351.931	7.592	0.162		3.796	8	3.796	0	3.796	0		22.1772 2.527 0.000 2.5						7.592	0.0995			13.6698 14.161 0.000 14.2						7.592	0			3.4388 0.857 0.9						3.796	0
7.6	1016	7.6	976.882	7.6	1.227		7.6	357	7.6	350.571	7.6	0.339		3.8	6	3.8	0	3.8	0		22.2005 2.508 0.000 2.5						7.6	0.1016			13.6842 14.101 0.000 14.1						7.6	0			3.4425 0.848 0.8						3.8	0
7.608	980	7.608	974.013	7.608	0.191		7.608	373	7.608	349.22	7.608	1.228		3.804	9	3.804	0	3.804	0		22.2239 2.489 0.000 2.5						7.608	0.098			13.6986 14.042 0.000 14.0						7.608	0			3.4461 0.840 0.8						3.804	0
7.616	958	7.616	971.156	7.616	-0.425		7.616	350	7.616	347.879	7.616	0.113		3.808	4	3.808	0	3.808	0		22.2472 2.471 0.000 2.5						7.616	0.0958			13.7130 13.983 0.000 14.0						7.616	0			3.4497 0.831 0.8						3.808	0
7.624	1020	7.624	968.31	7.624	1.618		7.624	345	7.624	346.548	7.624	-0.083		3.812	8	3.812	0	3.812	0		22.2706 2.453 0.000 2.5						7.624	0.102			13.7274 13.925 0.000 13.9						7.624	0			3.4533 0.823 0.8						3.812	0
7.632	987	7.632	965.476	7.632	0.684		7.632	385	7.632	345.226	7.632	2.022		3.816	8	3.816	0	3.816	0		22.2939 2.434 0.000 2.4						7.632	0.0987			13.7418 13.866 0.000 13.9						7.632	0			3.4569 0.815 0.8						3.816	0
7.64	948	7.64	962.653	7.64	-0.475		7.64	359	7.64	343.914	7.64	0.794		3.82	8	3.82	0	3.82	0		22.3173 2.416 0.000 2.4						7.64	0.0948			13.7562 13.808 0.000 13.8						7.64	0			3.4606 0.807 0.8						3.82	0
7.648	985	7.648	959.841	7.648	0.801		7.648	364	7.648	342.612	7.648	1.118		3.824	10	3.824	0	3.824	0		22.3406 2.399 0.000 2.4						7.648	0.0985			13.7706 13.751 0.000 13.8						7.648	0			3.4642 0.799 0.8						3.824	0
7.656	934	7.656	957.041	7.656	-0.753		7.656	349	7.656	341.319	7.656	0.41		3.828	8	3.828	0	3.828	0		22.3639 2.381 0.000 2.4						7.656	0.0934			13.7850 13.693 0.000 13.7						7.656	0			3.4678 0.791 0.8						3.828	0
7.664	950	7.664	954.251	7.664	-0.138		7.664	372	7.664	340.035	7.664	1.653		3.832	7	3.832	0	3.832	0		22.3873 2.363 0.000 2.4						7.664	0.095			13.7993 13.636 0.000 13.6						7.664	0			3.4714 0.783 0.8						3.832	0
7.672	983	7.672	951.473	7.672	1.005		7.672	388	7.672	338.76	7.672	2.493		3.836	10	3.836	0	3.836	0		22.4106 2.346 0.000 2.3						7.672	0.0983			13.8137 13.578 0.000 13.6						7.672	0			3.4750 0.775 0.8						3.836	0
7.68	974	7.68	948.706	7.68	0.81		7.68	343	7.68	337.495	7.68	0.296		3.84	8	3.84	0	3.84	0		22.4340 2.328 0.000 2.3						7.68	0.0974			13.8281 13.522 0.000 13.5						7.68	0			3.4787 0.767 0.8						3.84	0
7.688	984	7.688	945.949	7.688	1.212		7.688	315	7.688	336.238	7.688	-1.193		3.844	9	3.844	0	3.844	0		22.4573 2.311 0.000 2.3						7.688	0.0984			13.8425 13.465 0.000 13.5						7.688	0			3.4823 0.760 0.8						3.844	0
7.696	956	7.696	943.203	7.696	0.413		7.696	329	7.696	334.99	7.696	-0.329		3.848	14	3.848	0	3.848	0		22.4807 2.294 0.000 2.3						7.696	0.0956			13.8569 13.409 0.000 13.4						7.696	0			3.4859 0.752 0.8						3.848	0
7.704	994	7.704	940.468	7.704	1.696		7.704	354	7.704	333.751	7.704	1.073		3.852	4	3.852	0	3.852	0		22.5040 2.277 0.000 2.3						7.704	0.0994			13.8713 13.352 0.000 13.4						7.704	0			3.4895 0.745 0.7						3.852	0
7.712	991	7.712	937.744	7.712	1.69		7.712	334	7.712	332.521	7.712	0.081		3.856	6	3.856	0	3.856	0		22.5274 2.260 0.000 2.3						7.712	0.0991			13.8857 13.296 0.000 13.3						7.712	0			3.4931 0.737 0.7						3.856	0
7.72	934	7.72	935.031	7.72	-0.034		7.72	316	7.72	331.299	7.72	-0.858		3.86	12	3.86	0	3.86	0		22.5507 2.243 0.000 2.2						7.72	0.0934			13.9001 13.241 0.000 13.2						7.72	0			3.4968 0.730 0.7						3.86	0
7.728	950	7.728	932.328	7.728	0.573		7.728	326	7.728	330.085	7.728	-0.226		3.864	9	3.864	0	3.864	0		22.5740 2.227 0.000 2.2						7.728	0.095			13.9145 13.185 0.000 13.2						7.728	0			3.5004 0.723 0.7						3.864	0
7.736	934	7.736	929.635	7.736	0.143		7.736	326	7.736	328.881	7.736	-0.159		3.868	14	3.868	0	3.868	0		22.5974 2.210 0.000 2.2						7.736	0.0934			13.9289 13.130 0.000 13.1						7.736	0			3.5040 0.716 0.7						3.868	0
7.744	892	7.744	926.953	7.744	-1.169		7.744	346	7.744	327.684	7.744	0.982		3.872	12	3.872	0	3.872	0		22.6207 2.194 0.000 2.2						7.744	0.0892			13.9432 13.075 0.000 13.1						7.744	0			3.5076 0.708 0.7						3.872	0
7.752	942	7.752	924.281	7.752	0.577		7.752	302	7.752	326.496	7.752	-1.405		3.876	13	3.876	0	3.876	0		22.6441 2.178 0.000 2.2						7.752	0.0942			13.9576 13.020 0.000 13.0						7.752	0			3.5112 0.701 0.7						3.876	0
7.76	940	7.76	921.62	7.76	0.599		7.76	329	7.76	325.316	7.76	0.203		3.88	17	3.88	0	3.88	0		22.6674 2.161 0.000 2.2						7.76	0.094			13.9720 12.966 0.000 13.0						7.76	0			3.5149 0.694 0.7						3.88	0
7.768	990	7.768	918.969	7.768	2.255		7.768	319	7.768	324.144	7.768	-0.287		3.884	17	3.884	0	3.884	0		22.6908 2.145 0.000 2.1						7.768	0.099			13.9864 12.911 0.000 12.9						7.768	0			3.5185 0.688 0.7						3.884	0
7.776	949	7.776	916.328	7.776	1.059		7.776	291	7.776	322.98	7.776	-1.868		3.888	11	3.888	0	3.888	0		22.7141 2.130 0.000 2.1						7.776	0.0949			14.0008 12.857 0.000 12.9						7.776	0			3.5221 0.681 0.7						3.888	0
7.784	871	7.784	913.697	7.784	-1.445		7.784	341	7.784	321.824	7.784	1.035		3.892	20	3.892	0	3.892	0		22.7375 2.114 0.000 2.1						7.784	0.0871			14.0152 12.804 0.000 12.8						7.784	0			3.5257 0.674 0.7						3.892	0
7.792	929	7.792	911.076	7.792	0.587		7.792	340	7.792	320.675	7.792	1.045		3.896	21	3.896	0	3.896	0		22.7608 2.098 0.000 2.1						7.792	0.0929			14.0296 12.750 0.000 12.7						7.792	0			3.5293 0.667 0.7						3.896	0
7.8	900	7.8	908.466	7.8	-0.282		7.8	349	7.8	319.535	7.8	1.573		3.9	24	3.9	0	3.9	0		22.7841 2.083 0.000 2.1						7.8	0.09			14.0440 12.697 0.000 12.7						7.8	0			3.5330 0.661 0.7						3.9	0
7.808	904	7.808	905.865	7.808	-0.062		7.808	328	7.808	318.402	7.808	0.528		3.904	27	3.904	0	3.904	0		22.8075 2.067 0.000 2.1						7.808	0.0904			14.0584 12.643 0.000 12.6						7.808	0			3.5366 0.654 0.7						3.904	0
7.816	944	7.816	903.274	7.816	1.324		7.816	330	7.816	317.277	7.816	0.698		3.908	30	3.908	0	3.908	0		22.8308 2.052 0.000 2.1						7.816	0.0944			14.0727 12.590 0.000 12.6						7.816	0			3.5402 0.647 0.6						3.908	0
7.824	929	7.824	900.693	7.824	0.928		7.824	326	7.824	316.159	7.824	0.543		3.912	29	3.912	0	3.912	0		22.8542 2.037 0.000 2.0						7.824	0.0929			14.0871 12.538 0.000 12.5						7.824	0			3.5438 0.641 0.6						3.912	0
7.832	941	7.832	898.122	7.832	1.396		7.832	364	7.832	315.049	7.832	2.559		3.916	35	3.916	0	3.916	0		22.8775 2.022 0.000 2.0						7.832	0.0941			14.1015 12.485 0.000 12.5						7.832	0			3.5474 0.635 0.6						3.916	0
7.84	900	7.84	895.561	7.84	0.148		7.84	362	7.84	313.946	7.84	2.519		3.92	37	3.92	0	3.92	0		22.9009 2.007 0.000 2.0						7.84	0.09			14.1159 12.433 0.000 12.4						7.84	0			3.5511 0.628 0.6						3.92	0
7.848	942	7.848	893.009	7.848	1.595		7.848	287	7.848	312.85	7.848	-1.521		3.924	39	3.924	0	3.924	0		22.9242 1.992 0.000 2.0						7.848	0.0942			14.1303 12.381 0.000 12.4						7.848	0			3.5547 0.622 0.6						3.924	0
7.856	911	7.856	890.467	7.856	0.68		7.856	284	7.856	311.762	7.856	-1.642		3.928	31	3.928	0	3.928	0		22.9476 1.977 0.000 2.0						7.856	0.0911			14.1447 12.329 0.000 12.3						7.856	0			3.5583 0.616 0.6						3.928	0
7.864	902	7.864	887.934	7.864	0.468		7.864	323	7.864	310.681	7.864	0.683		3.932	45	3.932	0	3.932	0		22.9709 1.962 0.000 2.0						7.864	0.0902			14.1591 12.277 0.000 12.3						7.864	0			3.5619 0.610 0.6						3.932	0
7.872	889	7.872	885.411	7.872	0.12		7.872	298	7.872	309.607	7.872	-0.67		3.936	55	3.936	0	3.936	0		22.9942 1.948 0.000 1.9						7.872	0.0889			14.1735 12.226 0.000 12.2						7.872	0			3.5655 0.604 0.6						3.936	0
7.88	819	7.88	882.897	7.88	-2.23		7.88	299	7.88	308.54	7.88	-0.55		3.94	69	3.94	0	3.94	0		23.0176 1.933 0.000 1.9						7.88	0.0819			14.1879 12.175 0.000 12.2						7.88	0			3.5692 0.598 0.6						3.94	0
7.888	934	7.888	880.393	7.888	1.752		7.888	284	7.888	307.479	7.888	-1.388		3.944	63	3.944	0	3.944	0		23.0409 1.919 0.000 1.9						7.888	0.0934			14.2022 12.124 0.000 12.1						7.888	0			3.5728 0.592 0.6						3.944	0
7.896	869	7.896	877.898	7.896	-0.301		7.896	336	7.896	306.426	7.896	1.609		3.948	67	3.948	0	3.948	0		23.0643 1.905 0.000 1.9						7.896	0.0869			14.2166 12.073 0.000 12.1						7.896	0			3.5764 0.586 0.6						3.948	0
7.904	871	7.904	875.412	7.904	-0.149		7.904	317	7.904	305.38	7.904	0.651		3.952	79	3.952	0	3.952	0		23.0876 1.891 0.000 1.9						7.904	0.0871			14.2310 12.022 0.000 12.0						7.904	0			3.5800 0.580 0.6						3.952	0
7.912	887	7.912	872.935	7.912	0.472		7.912	352	7.912	304.34	7.912	2.533		3.956	91	3.956	0	3.956	0		23.1110 1.877 0.000 1.9						7.912	0.0887			14.2454 11.972 0.000 12.0						7.912	0			3.5836 0.574 0.6						3.956	0
7.92	834	7.92	870.468	7.92	-1.261		7.92	315	7.92	303.307	7.92	0.657		3.96	102	3.96	0	3.96	0		23.1343 1.863 0.000 1.9						7.92	0.0834			14.2598 11.922 0.000 11.9						7.92	0			3.5873 0.569 0.6						3.96	0
7.928	861	7.928	868.01	7.928	-0.239		7.928	301	7.928	302.28	7.928	-0.074		3.964	110	3.964	0	3.964	0		23.1577 1.849 0.000 1.8						7.928	0.0861			14.2742 11.872 0.000 11.9						7.928	0			3.5909 0.563 0.6						3.964	0
7.936	878	7.936	865.561	7.936	0.419		7.936	335	7.936	301.26	7.936	1.838		3.968	144	3.968	0	3.968	0		23.1810 1.835 0.000 1.8						7.936	0.0878			14.2886 11.822 0.000 11.8						7.936	0			3.5945 0.557 0.6						3.968	0
7.944	840	7.944	863.121	7.944	-0.797		7.944	335	7.944	300.247	7.944	1.893		3.972	151	3.972	0	3.972	0		23.2043 1.822 0.000 1.8						7.944	0.084			14.3030 11.773 0.000 11.8						7.944	0			3.5981 0.552 0.6						3.972	0
7.952	911	7.952	860.69	7.952	1.665		7.952	297	7.952	299.24	7.952	-0.13		3.976	163	3.976	0	3.976	0		23.2277 1.808 0.000 1.8						7.952	0.0911			14.3174 11.723 0.000 11.7						7.952	0			3.6017 0.546 0.5						3.976	0
7.96	853	7.96	858.267	7.96	-0.18		7.96	323	7.96	298.239	7.96	1.373		3.98	167	3.98	0	3.98	0		23.2510 1.795 0.000 1.8						7.96	0.0853			14.3318 11.674 0.000 11.7						7.96	0			3.6054 0.541 0.5						3.98	0
7.968	844	7.968	855.854	7.968	-0.408		7.968	296	7.968	297.244	7.968	-0.072		3.984	176	3.984	0	3.984	0		23.2744 1.782 0.000 1.8						7.968	0.0844			14.3461 11.625 0.000 11.6						7.968	0			3.6090 0.535 0.5						3.984	0
7.976	845	7.976	853.449	7.976	-0.29		7.976	272	7.976	296.256	7.976	-1.465		3.988	249	3.988	0	3.988	0		23.2977 1.768 0.000 1.8						7.976	0.0845			14.3605 11.577 0.000 11.6						7.976	0			3.6126 0.530 0.5						3.988	0
7.984	853	7.984	851.053	7.984	0.067		7.984	318	7.984	295.274	7.984	1.27		3.992	228	3.992	0	3.992	0		23.3211 1.755 0.000 1.8						7.984	0.0853			14.3749 11.528 0.000 11.5						7.984	0			3.6162 0.525 0.5						3.992	0
7.992	882	7.992	848.666	7.992	1.121		7.992	296	7.992	294.298	7.992	0.099		3.996	296	3.996	0	3.996	0								7.992	0.0882									7.992	0									3.996	0
8	851	8	846.288	8	0.161		8	315	8	293.328	8	1.217		4	355	4	0	4	0								8	0.0851									8	0									4	0
8.008	852	8.008	843.918	8.008	0.277		8.008	304	8.008	292.364	8.008	0.665		4.004	394	4.004	0	4.004	0								8.008	0.0852									8.008	0									4.004	0
8.016	846	8.016	841.557	8.016	0.153		8.016	313	8.016	291.406	8.016	1.217		4.008	417	4.008	0	4.008	0								8.016	0.0846									8.016	0									4.008	0
8.024	882	8.024	839.204	8.024	1.439		8.024	312	8.024	290.454	8.024	1.216		4.012	464	4.012	0	4.012	0								8.024	0.0882									8.024	0									4.012	0
8.032	808	8.032	836.86	8.032	-1.014		8.032	276	8.032	289.507	8.032	-0.81		4.016	496	4.016	0	4.016	0								8.032	0.0808									8.032	0									4.016	0
8.04	795	8.04	834.524	8.04	-1.4		8.04	278	8.04	288.567	8.04	-0.631		4.02	576	4.02	0	4.02	0								8.04	0.0795									8.04	0									4.02	0
8.048	844	8.048	832.197	8.048	0.406		8.048	272	8.048	287.632	8.048	-0.944		4.024	614	4.024	0	4.024	0								8.048	0.0844									8.048	0									4.024	0
8.056	834	8.056	829.878	8.056	0.143		8.056	307	8.056	286.703	8.056	1.155		4.028	666	4.028	0	4.028	0								8.056	0.0834									8.056	0									4.028	0
8.064	810	8.064	827.567	8.064	-0.616		8.064	298	8.064	285.779	8.064	0.706		4.032	713	4.032	0	4.032	0								8.064	0.081									8.064	0									4.032	0
8.072	831	8.072	825.264	8.072	0.199		8.072	288	8.072	284.861	8.072	0.184		4.036	835	4.036	0	4.036	0								8.072	0.0831									8.072	0									4.036	0
8.08	783	8.08	822.97	8.08	-1.427		8.08	301	8.08	283.948	8.08	0.98		4.04	910	4.04	0	4.04	0								8.08	0.0783									8.08	0									4.04	0
8.088	842	8.088	820.684	8.088	0.734		8.088	288	8.088	283.041	8.088	0.291		4.044	1070	4.044	0	4.044	0								8.088	0.0842									8.088	0									4.044	0
8.096	839	8.096	818.406	8.096	0.71		8.096	295	8.096	282.139	8.096	0.746		4.048	1107	4.048	0	4.048	0								8.096	0.0839									8.096	0									4.048	0
8.104	826	8.104	816.135	8.104	0.343		8.104	292	8.104	281.242	8.104	0.627		4.052	1294	4.052	0	4.052	0								8.104	0.0826									8.104	0									4.052	0
8.112	797	8.112	813.874	8.112	-0.597		8.112	302	8.112	280.351	8.112	1.242		4.056	1361	4.056	0	4.056	0								8.112	0.0797									8.112	0									4.056	0
8.12	807	8.12	811.62	8.12	-0.162		8.12	289	8.12	279.465	8.12	0.559		4.06	1438	4.06	0	4.06	0								8.12	0.0807									8.12	0									4.06	0
8.128	779	8.128	809.373	8.128	-1.087		8.128	285	8.128	278.584	8.128	0.379		4.064	1613	4.064	0	4.064	0								8.128	0.0779									8.128	0									4.064	0
8.136	746	8.136	807.135	8.136	-2.235		8.136	273	8.136	277.708	8.136	-0.284		4.068	1717	4.068	0	4.068	0								8.136	0.0746									8.136	0									4.068	0
8.144	806	8.144	804.905	8.144	0.039		8.144	299	8.144	276.837	8.144	1.277		4.072	1922	4.072	0	4.072	0								8.144	0.0806									8.144	0									4.072	0
8.152	806	8.152	802.682	8.152	0.117		8.152	296	8.152	275.971	8.152	1.16		4.076	2122	4.076	0	4.076	0								8.152	0.0806									8.152	0									4.076	0
8.16	758	8.16	800.467	8.16	-1.54		8.16	299	8.16	275.111	8.16	1.377		4.08	2157	4.08	0	4.08	0								8.16	0.0758									8.16	0									4.08	0
8.168	840	8.168	798.26	8.168	1.438		8.168	277	8.168	274.255	8.168	0.164		4.084	2383	4.084	0	4.084	0								8.168	0.084									8.168	0									4.084	0
8.176	818	8.176	796.061	8.176	0.766		8.176	270	8.176	273.404	8.176	-0.206		4.088	2555	4.088	0	4.088	0								8.176	0.0818									8.176	0									4.088	0
8.184	802	8.184	793.869	8.184	0.287		8.184	281	8.184	272.558	8.184	0.502		4.092	2695	4.092	0	4.092	0								8.184	0.0802									8.184	0									4.092	0
8.192	781	8.192	791.685	8.192	-0.382		8.192	265	8.192	271.717	8.192	-0.411		4.096	3013	4.096	0	4.096	0								8.192	0.0781									8.192	0									4.096	0
8.2	755	8.2	789.509	8.2	-1.254		8.2	285	8.2	270.88	8.2	0.833		4.1	3108	4.1	0	4.1	0								8.2	0.0755									8.2	0									4.1	0
8.208	749	8.208	787.34	8.208	-1.399		8.208	311	8.208	270.048	8.208	2.315		4.104	3335	4.104	0	4.104	0								8.208	0.0749									8.208	0									4.104	0
8.216	820	8.216	785.178	8.216	1.215		8.216	264	8.216	269.221	8.216	-0.32		4.108	3502	4.108	0	4.108	0								8.216	0.082									8.216	0									4.108	0
8.224	770	8.224	783.024	8.224	-0.469		8.224	263	8.224	268.398	8.224	-0.332		4.112	3666	4.112	0	4.112	0								8.224	0.077									8.224	0									4.112	0
8.232	788	8.232	780.877	8.232	0.253		8.232	279	8.232	267.58	8.232	0.681		4.116	3937	4.116	0	4.116	0								8.232	0.0788									8.232	0									4.116	0
8.24	760	8.24	778.738	8.24	-0.679		8.24	260	8.24	266.767	8.24	-0.418		4.12	4299	4.12	0	4.12	0								8.24	0.076									8.24	0									4.12	0
8.248	741	8.248	776.606	8.248	-1.306		8.248	264	8.248	265.958	8.248	-0.12		4.124	4329	4.124	0	4.124	0								8.248	0.0741									8.248	0									4.124	0
8.256	720	8.256	774.481	8.256	-2.028		8.256	297	8.256	265.153	8.256	1.842		4.128	4633	4.128	0	4.128	0								8.256	0.072									8.256	0									4.128	0
8.264	781	8.264	772.364	8.264	0.309		8.264	266	8.264	264.353	8.264	0.101		4.132	5046	4.132	0	4.132	0								8.264	0.0781									8.264	0									4.132	0
8.272	745	8.272	770.253	8.272	-0.924		8.272	265	8.272	263.557	8.272	0.088		4.136	5211	4.136	0	4.136	0								8.272	0.0745									8.272	0									4.136	0
8.28	805	8.28	768.15	8.28	1.297		8.28	287	8.28	262.766	8.28	1.426		4.14	5364	4.14	0	4.14	0								8.28	0.0805									8.28	0									4.14	0
8.288	741	8.288	766.054	8.288	-0.919		8.288	273	8.288	261.979	8.288	0.665		4.144	5528	4.144	0	4.144	0								8.288	0.0741									8.288	0									4.144	0
8.296	793	8.296	763.966	8.296	1.03		8.296	268	8.296	261.196	8.296	0.414		4.148	5835	4.148	0	4.148	0								8.296	0.0793									8.296	0									4.148	0
8.304	788	8.304	761.884	8.304	0.929		8.304	275	8.304	260.417	8.304	0.876		4.152	6017	4.152	0	4.152	0								8.304	0.0788									8.304	0									4.152	0
8.312	738	8.312	759.809	8.312	-0.802		8.312	261	8.312	259.643	8.312	0.084		4.156	6187	4.156	0	4.156	0								8.312	0.0738									8.312	0									4.156	0
8.32	676	8.32	757.742	8.32	-3.139		8.32	268	8.32	258.872	8.32	0.555		4.16	6508	4.16	0	4.16	0								8.32	0.0676									8.32	0									4.16	0
8.328	765	8.328	755.681	8.328	0.336		8.328	274	8.328	258.106	8.328	0.957		4.164	6495	4.164	0	4.164	0								8.328	0.0765									8.328	0									4.164	0
8.336	674	8.336	753.627	8.336	-3.063		8.336	256	8.336	257.344	8.336	-0.084		4.168	6988	4.168	0	4.168	0								8.336	0.0674									8.336	0									4.168	0
8.344	766	8.344	751.58	8.344	0.52		8.344	244	8.344	256.586	8.344	-0.802		4.172	7255	4.172	0	4.172	0								8.344	0.0766									8.344	0									4.172	0
8.352	772	8.352	749.54	8.352	0.807		8.352	282	8.352	255.831	8.352	1.553		4.176	7357	4.176	0	4.176	0								8.352	0.0772									8.352	0									4.176	0
8.36	754	8.36	747.507	8.36	0.236		8.36	252	8.36	255.081	8.36	-0.193		4.18	7430	4.18	0	4.18	0								8.36	0.0754									8.36	0									4.18	0
8.368	706	8.368	745.48	8.368	-1.484		8.368	265	8.368	254.335	8.368	0.653		4.184	7826	4.184	0	4.184	0								8.368	0.0706									8.368	0									4.184	0
8.376	738	8.376	743.461	8.376	-0.201		8.376	233	8.376	253.592	8.376	-1.343		4.188	7792	4.188	0	4.188	0								8.376	0.0738									8.376	0									4.188	0
8.384	749	8.384	741.448	8.384	0.276		8.384	259	8.384	252.853	8.384	0.38		4.192	8048	4.192	0	4.192	0								8.384	0.0749									8.384	0									4.192	0
8.392	773	8.392	739.442	8.392	1.205		8.392	276	8.392	252.119	8.392	1.432		4.196	8503	4.196	0	4.196	0								8.392	0.0773									8.392	0									4.196	0
8.4	729	8.4	737.442	8.4	-0.312		8.4	271	8.4	251.388	8.4	1.187		4.2	8448	4.2	0	4.2	0								8.4	0.0729									8.4	0									4.2	0
8.408	718	8.408	735.449	8.408	-0.65		8.408	247	8.408	250.66	8.408	-0.232		4.204	8670	4.204	0	4.204	0								8.408	0.0718									8.408	0									4.204	0
8.416	755	8.416	733.463	8.416	0.783		8.416	271	8.416	249.937	8.416	1.275		4.208	8844	4.208	0	4.208	0								8.416	0.0755									8.416	0									4.208	0
8.424	753	8.424	731.483	8.424	0.783		8.424	269	8.424	249.217	8.424	1.202		4.212	9015	4.212	0	4.212	0								8.424	0.0753									8.424	0									4.212	0
8.432	717	8.432	729.51	8.432	-0.467		8.432	249	8.432	248.5	8.432	0.032		4.216	9270	4.216	0	4.216	0								8.432	0.0717									8.432	0									4.216	0
8.44	717	8.44	727.543	8.44	-0.393		8.44	256	8.44	247.788	8.44	0.511		4.22	9288	4.22	0	4.22	0								8.44	0.0717									8.44	0									4.22	0
8.448	674	8.448	725.582	8.448	-1.984		8.448	237	8.448	247.079	8.448	-0.652		4.224	9169	4.224	0	4.224	0								8.448	0.0674									8.448	0									4.224	0
8.456	706	8.456	723.629	8.456	-0.663		8.456	242	8.456	246.373	8.456	-0.28		4.228	9355	4.228	0	4.228	0								8.456	0.0706									8.456	0									4.228	0
8.464	715	8.464	721.681	8.464	-0.25		8.464	236	8.464	245.671	8.464	-0.627		4.232	9409	4.232	0	4.232	0								8.464	0.0715									8.464	0									4.232	0
8.472	708	8.472	719.74	8.472	-0.441		8.472	276	8.472	244.972	8.472	1.861		4.236	9412	4.236	0	4.236	0								8.472	0.0708									8.472	0									4.236	0
8.48	744	8.48	717.805	8.48	0.959		8.48	253	8.48	244.277	8.48	0.546		4.24	9539	4.24	0	4.24	0								8.48	0.0744									8.48	0									4.24	0
8.488	681	8.488	715.877	8.488	-1.335		8.488	252	8.488	243.586	8.488	0.528		4.244	9683	4.244	11450.4	4.244	-17.961								8.488	0.0681									8.488	0									4.244	0
8.496	719	8.496	713.955	8.496	0.188		8.496	244	8.496	242.897	8.496	0.07		4.248	9872	4.248	11324.6	4.248	-14.62								8.496	0.0719									8.496	0									4.248	0
8.504	733	8.504	712.039	8.504	0.773		8.504	271	8.504	242.212	8.504	1.742		4.252	9734	4.252	11200.2	4.252	-14.861								8.504	0.0733									8.504	0									4.252	0
8.512	765	8.512	710.129	8.512	1.981		8.512	248	8.512	241.531	8.512	0.409		4.256	9820	4.256	11077.2	4.256	-12.687								8.512	0.0765									8.512	0									4.256	0
8.52	694	8.52	708.225	8.52	-0.539		8.52	247	8.52	240.853	8.52	0.39		4.26	9726	4.26	10955.5	4.26	-12.467								8.52	0.0694									8.52	0									4.26	0
8.528	728	8.528	706.328	8.528	0.802		8.528	269	8.528	240.178	8.528	1.751		4.264	9899	4.264	10835.2	4.264	-9.409								8.528	0.0728									8.528	0									4.264	0
8.536	712	8.536	704.437	8.536	0.283		8.536	269	8.536	239.506	8.536	1.792		4.268	9814	4.268	10716.2	4.268	-9.107								8.536	0.0712									8.536	0									4.268	0
8.544	728	8.544	702.552	8.544	0.942		8.544	244	8.544	238.837	8.544	0.329		4.272	9925	4.272	10598.5	4.272	-6.76								8.544	0.0728									8.544	0									4.272	0
8.552	680	8.552	700.673	8.552	-0.792		8.552	250	8.552	238.172	8.552	0.745		4.276	10000	4.276	10482	4.276	-4.82								8.552	0.068									8.552	0									4.276	0
8.56	714	8.56	698.8	8.56	0.568		8.56	231	8.56	237.51	8.56	-0.426		4.28	9853	4.28	10366.9	4.28	-5.177								8.56	0.0714									8.56	0									4.28	0
8.568	715	8.568	696.933	8.568	0.675		8.568	227	8.568	236.851	8.568	-0.651		4.284	9775	4.284	10253	4.284	-4.835								8.568	0.0715									8.568	0									4.284	0
8.576	668	8.576	695.072	8.576	-1.046		8.576	243	8.576	236.195	8.576	0.435		4.288	9751	4.288	10140.4	4.288	-3.943								8.576	0.0668									8.576	0									4.288	0
8.584	727	8.584	693.217	8.584	1.251		8.584	256	8.584	235.543	8.584	1.274		4.292	9592	4.292	10029	4.292	-4.462								8.584	0.0727									8.584	0									4.292	0
8.592	676	8.592	691.368	8.592	-0.59		8.592	248	8.592	234.893	8.592	0.829		4.296	9715	4.296	9918.86	4.296	-2.068								8.592	0.0676									8.592	0									4.296	0
8.6	677	8.6	689.525	8.6	-0.481		8.6	217	8.6	234.246	8.6	-1.165		4.3	9649	4.3	9809.91	4.3	-1.638								8.6	0.0677									8.6	0									4.3	0
8.608	703	8.608	687.687	8.608	0.577		8.608	232	8.608	233.603	8.608	-0.105		4.304	9543	4.304	9702.16	4.304	-1.629								8.608	0.0703									8.608	0									4.304	0
8.616	668	8.616	685.856	8.616	-0.69		8.616	229	8.616	232.962	8.616	-0.261		4.308	9494	4.308	9595.59	4.308	-1.043								8.616	0.0668									8.616	0									4.308	0
8.624	640	8.624	684.03	8.624	-1.738		8.624	246	8.624	232.324	8.624	0.868		4.312	9384	4.312	9490.19	4.312	-1.096								8.624	0.064									8.624	0									4.312	0
8.632	671	8.632	682.211	8.632	-0.432		8.632	232	8.632	231.69	8.632	0.02		4.316	9450	4.316	9385.95	4.316	0.659								8.632	0.0671									8.632	0									4.316	0
8.64	698	8.64	680.397	8.64	0.665		8.64	257	8.64	231.058	8.64	1.612		4.32	9278	4.32	9282.86	4.32	-0.05								8.64	0.0698									8.64	0									4.32	0
8.648	691	8.648	678.588	8.648	0.471		8.648	255	8.648	230.429	8.648	1.533		4.324	9423	4.324	9180.9	4.324	2.494								8.648	0.0691									8.648	0									4.324	0
8.656	671	8.656	676.786	8.656	-0.223		8.656	228	8.656	229.803	8.656	-0.119		4.328	9365	4.328	9080.06	4.328	2.944								8.656	0.0671									8.656	0									4.328	0
8.664	677	8.664	674.989	8.664	0.077		8.664	242	8.664	229.18	8.664	0.821		4.332	9276	4.332	8980.33	4.332	3.07								8.664	0.0677									8.664	0									4.332	0
8.672	646	8.672	673.198	8.672	-1.068		8.672	221	8.672	228.559	8.672	-0.506		4.336	9188	4.336	8881.69	4.336	3.196								8.672	0.0646									8.672	0									4.336	0
8.68	627	8.68	671.412	8.68	-1.771		8.68	265	8.68	227.942	8.68	2.268		4.34	9074	4.34	8784.14	4.34	3.043								8.68	0.0627									8.68	0									4.34	0
8.688	644	8.688	669.632	8.688	-1.008		8.688	231	8.688	227.327	8.688	0.241		4.344	9038	4.344	8687.66	4.344	3.685								8.688	0.0644									8.688	0									4.344	0
8.696	633	8.696	667.858	8.696	-1.383		8.696	239	8.696	226.715	8.696	0.791		4.348	8938	4.348	8592.24	4.348	3.657								8.696	0.0633									8.696	0									4.348	0
8.704	670	8.704	666.089	8.704	0.151		8.704	235	8.704	226.106	8.704	0.578		4.352	8669	4.352	8497.87	4.352	1.838								8.704	0.067									8.704	0									4.352	0
8.712	712	8.712	664.326	8.712	1.784		8.712	230	8.712	225.499	8.712	0.295		4.356	8973	4.356	8404.54	4.356	6.001								8.712	0.0712									8.712	0									4.356	0
8.72	657	8.72	662.568	8.72	-0.217		8.72	227	8.72	224.895	8.72	0.139		4.36	8706	4.36	8312.23	4.36	4.22								8.72	0.0657									8.72	0									4.36	0
8.728	627	8.728	660.816	8.728	-1.348		8.728	226	8.728	224.294	8.728	0.113		4.364	8558	4.364	8220.94	4.364	3.644								8.728	0.0627									8.728	0									4.364	0
8.736	618	8.736	659.069	8.736	-1.649		8.736	231	8.736	223.695	8.736	0.479		4.368	8551	4.368	8130.65	4.368	4.546								8.736	0.0618									8.736	0									4.368	0
8.744	623	8.744	657.328	8.744	-1.373		8.744	228	8.744	223.099	8.744	0.323		4.372	8471	4.372	8041.35	4.372	4.668								8.744	0.0623									8.744	0									4.372	0
8.752	643	8.752	655.592	8.752	-0.496		8.752	214	8.752	222.506	8.752	-0.579		4.376	8308	4.376	7953.04	4.376	3.894								8.752	0.0643									8.752	0									4.376	0
8.76	584	8.76	653.862	8.76	-2.886		8.76	214	8.76	221.915	8.76	-0.539		4.38	8184	4.38	7865.69	4.38	3.519								8.76	0.0584									8.76	0									4.38	0
8.768	638	8.768	652.137	8.768	-0.559		8.768	199	8.768	221.327	8.768	-1.575		4.384	8106	4.384	7779.3	4.384	3.629								8.768	0.0638									8.768	0									4.384	0
8.776	665	8.776	650.417	8.776	0.565		8.776	207	8.776	220.741	8.776	-0.951		4.388	8005	4.388	7693.87	4.388	3.477								8.776	0.0665									8.776	0									4.388	0
8.784	636	8.784	648.702	8.784	-0.503		8.784	212	8.784	220.158	8.784	-0.558		4.392	7906	4.392	7609.37	4.392	3.336								8.784	0.0636									8.784	0									4.392	0
8.792	619	8.792	646.993	8.792	-1.123		8.792	206	8.792	219.578	8.792	-0.941		4.396	7917	4.396	7525.8	4.396	4.397								8.792	0.0619									8.792	0									4.396	0
8.8	673	8.8	645.29	8.8	1.067		8.8	247	8.8	218.999	8.8	1.774		4.4	7713	4.4	7443.15	4.4	3.073								8.8	0.0673									8.8	0									4.4	0
8.808	616	8.808	643.591	8.808	-1.11		8.808	204	8.808	218.424	8.808	-1.005		4.404	7761	4.404	7361.41	4.404	4.536								8.808	0.0616									8.808	0									4.404	0
8.816	650	8.816	641.898	8.816	0.317		8.816	227	8.816	217.851	8.816	0.605		4.408	7714	4.408	7280.56	4.408	4.935								8.816	0.065									8.816	0									4.408	0
8.824	649	8.824	640.21	8.824	0.345		8.824	223	8.824	217.28	8.824	0.381		4.412	7517	4.412	7200.6	4.412	3.649								8.824	0.0649									8.824	0									4.412	0
8.832	626	8.832	638.527	8.832	-0.5		8.832	244	8.832	216.711	8.832	1.74		4.416	7346	4.416	7121.53	4.416	2.619								8.832	0.0626									8.832	0									4.416	0
8.84	631	8.84	636.849	8.84	-0.232		8.84	229	8.84	216.145	8.84	0.846		4.42	7482	4.42	7043.32	4.42	5.072								8.84	0.0631									8.84	0									4.42	0
8.848	666	8.848	635.176	8.848	1.193		8.848	239	8.848	215.582	8.848	1.509		4.424	7340	4.424	6965.97	4.424	4.366								8.848	0.0666									8.848	0									4.424	0
8.856	630	8.856	633.509	8.856	-0.14		8.856	214	8.856	215.02	8.856	-0.069		4.428	7244	4.428	6889.47	4.428	4.165								8.856	0.063									8.856	0									4.428	0
8.864	624	8.864	631.846	8.864	-0.314		8.864	244	8.864	214.461	8.864	1.883		4.432	7120	4.432	6813.81	4.432	3.629								8.864	0.0624									8.864	0									4.432	0
8.872	608	8.872	630.189	8.872	-0.898		8.872	226	8.872	213.905	8.872	0.801		4.436	6934	4.436	6738.99	4.436	2.342								8.872	0.0608									8.872	0									4.436	0
8.88	607	8.88	628.537	8.88	-0.873		8.88	188	8.88	213.35	8.88	-1.839		4.44	6902	4.44	6664.98	4.44	2.853								8.88	0.0607									8.88	0									4.44	0
8.888	626	8.888	626.889	8.888	-0.035		8.888	227	8.888	212.798	8.888	0.938		4.444	6914	4.444	6591.79	4.444	3.875								8.888	0.0626									8.888	0									4.444	0
8.896	587	8.896	625.247	8.896	-1.576		8.896	210	8.896	212.249	8.896	-0.154		4.448	6808	4.448	6519.41	4.448	3.498								8.896	0.0587									8.896	0									4.448	0
8.904	619	8.904	623.61	8.904	-0.185		8.904	235	8.904	211.701	8.904	1.513		4.452	6857	4.452	6447.81	4.452	4.941								8.904	0.0619									8.904	0									4.452	0
8.912	624	8.912	621.978	8.912	0.081		8.912	206	8.912	211.156	8.912	-0.357		4.456	6808	4.456	6377.01	4.456	5.223								8.912	0.0624									8.912	0									4.456	0
8.92	619	8.92	620.351	8.92	-0.054		8.92	199	8.92	210.613	8.92	-0.819		4.46	6564	4.46	6306.98	4.46	3.172								8.92	0.0619									8.92	0									4.46	0
8.928	560	8.928	618.728	8.928	-2.477		8.928	206	8.928	210.072	8.928	-0.282		4.464	6470	4.464	6237.73	4.464	2.888								8.928	0.056									8.928	0									4.464	0
8.936	615	8.936	617.111	8.936	-0.085		8.936	209	8.936	209.533	8.936	-0.037		4.468	6494	4.468	6169.23	4.468	4.03								8.936	0.0615									8.936	0									4.468	0
8.944	602	8.944	615.498	8.944	-0.549		8.944	208	8.944	208.997	8.944	-0.069		4.472	6296	4.472	6101.49	4.472	2.451								8.944	0.0602									8.944	0									4.472	0
8.952	607	8.952	613.89	8.952	-0.279		8.952	223	8.952	208.462	8.952	0.969		4.476	6275	4.476	6034.49	4.476	3.036								8.952	0.0607									8.952	0									4.476	0
8.96	626	8.96	612.288	8.96	0.547		8.96	234	8.96	207.93	8.96	1.697		4.48	6117	4.48	5968.23	4.48	1.902								8.96	0.0626									8.96	0									4.48	0
8.968	639	8.968	610.69	8.968	1.118		8.968	232	8.968	207.4	8.968	1.608		4.484	6037	4.484	5902.69	4.484	1.729								8.968	0.0639									8.968	0									4.484	0
8.976	609	8.976	609.096	8.976	-0.004		8.976	230	8.976	206.872	8.976	1.518		4.488	6085	4.488	5837.88	4.488	3.168								8.976	0.0609									8.976	0									4.488	0
8.984	609	8.984	607.508	8.984	0.06		8.984	182	8.984	206.346	8.984	-1.795		4.492	5958	4.492	5773.78	4.492	2.387								8.984	0.0609									8.984	0									4.492	0
8.992	593	8.992	605.924	8.992	-0.53		8.992	220	8.992	205.822	8.992	0.952		4.496	5967	4.496	5710.38	4.496	3.322								8.992	0.0593									8.992	0									4.496	0
9	544	9	604.345	9	-2.583		9	221	9	205.3	9	1.051		4.5	5804	4.5	5647.68	4.5	2.052								9	0.0544									9	0									4.5	0
9.008	568	9.008	602.771	9.008	-1.456		9.008	191	9.008	204.78	9.008	-0.992		4.504	5872	4.504	5585.67	4.504	3.737								9.008	0.0568									9.008	0									4.504	0
9.016	573	9.016	601.202	9.016	-1.176		9.016	200	9.016	204.263	9.016	-0.3		4.508	5832	4.508	5524.34	4.508	4.029								9.016	0.0573									9.016	0									4.508	0
9.024	605	9.024	599.637	9.024	0.218		9.024	194	9.024	203.747	9.024	-0.696		4.512	5664	4.512	5463.68	4.512	2.662								9.024	0.0605									9.024	0									4.512	0
9.032	600	9.032	598.077	9.032	0.078		9.032	201	9.032	203.233	9.032	-0.157		4.516	5722	4.516	5403.69	4.516	4.208								9.032	0.06									9.032	0									4.516	0
9.04	572	9.04	596.522	9.04	-1.024		9.04	213	9.04	202.722	9.04	0.701		4.52	5541	4.52	5344.36	4.52	2.642								9.04	0.0572									9.04	0									4.52	0
9.048	578	9.048	594.971	9.048	-0.705		9.048	199	9.048	202.212	9.048	-0.227		4.524	5637	4.524	5285.68	4.524	4.679								9.048	0.0578									9.048	0									4.524	0
9.056	540	9.056	593.425	9.056	-2.295		9.056	207	9.056	201.704	9.056	0.366		4.528	5319	4.528	5227.65	4.528	1.253								9.056	0.054									9.056	0									4.528	0
9.064	561	9.064	591.883	9.064	-1.302		9.064	213	9.064	201.198	9.064	0.805		4.532	5403	4.532	5170.26	4.532	3.166								9.064	0.0561									9.064	0									4.532	0
9.072	550	9.072	590.346	9.072	-1.717		9.072	207	9.072	200.694	9.072	0.436		4.536	5372	4.536	5113.49	4.536	3.527								9.072	0.055									9.072	0									4.536	0
9.08	585	9.08	588.814	9.08	-0.157		9.08	210	9.08	200.192	9.08	0.674		4.54	5353	4.54	5057.35	4.54	4.041								9.08	0.0585									9.08	0									4.54	0
9.088	596	9.088	587.286	9.088	0.356		9.088	208	9.088	199.692	9.088	0.573		4.544	5149	4.544	5001.83	4.544	2.051								9.088	0.0596									9.088	0									4.544	0
9.096	623	9.096	585.763	9.096	1.489		9.096	174	9.096	199.194	9.096	-1.899		4.548	5098	4.548	4946.91	4.548	2.116								9.096	0.0623									9.096	0									4.548	0
9.104	607	9.104	584.244	9.104	0.922		9.104	215	9.104	198.698	9.104	1.107		4.552	5062	4.552	4892.6	4.552	2.381								9.104	0.0607									9.104	0									4.552	0
9.112	559	9.112	582.729	9.112	-1.002		9.112	226	9.112	198.203	9.112	1.841		4.556	5037	4.556	4838.89	4.556	2.791								9.112	0.0559									9.112	0									4.556	0
9.12	581	9.12	581.22	9.12	-0.009		9.12	192	9.12	197.71	9.12	-0.41		4.56	5016	4.56	4785.76	4.56	3.251								9.12	0.0581									9.12	0									4.56	0
9.128	587	9.128	579.714	9.128	0.3		9.128	217	9.128	197.22	9.128	1.337		4.564	4820	4.564	4733.23	4.564	1.25								9.128	0.0587									9.128	0									4.564	0
9.136	595	9.136	578.213	9.136	0.687		9.136	191	9.136	196.731	9.136	-0.413		4.568	4836	4.568	4681.26	4.568	2.225								9.136	0.0595									9.136	0									4.568	0
9.144	528	9.144	576.717	9.144	-2.116		9.144	203	9.144	196.244	9.144	0.472		4.572	4725	4.572	4629.87	4.572	1.384								9.144	0.0528									9.144	0									4.572	0
9.152	556	9.152	575.224	9.152	-0.814		9.152	195	9.152	195.758	9.152	-0.054		4.576	4649	4.576	4579.05	4.576	1.026								9.152	0.0556									9.152	0									4.576	0
9.16	578	9.16	573.737	9.16	0.177		9.16	184	9.16	195.275	9.16	-0.827		4.58	4767	4.58	4528.78	4.58	3.45								9.16	0.0578									9.16	0									4.58	0
9.168	587	9.168	572.253	9.168	0.608		9.168	198	9.168	194.793	9.168	0.227		4.584	4665	4.584	4479.06	4.584	2.722								9.168	0.0587									9.168	0									4.584	0
9.176	546	9.176	570.774	9.176	-1.058		9.176	196	9.176	194.313	9.176	0.12		4.588	4682	4.588	4429.89	4.588	3.684								9.176	0.0546									9.176	0									4.588	0
9.184	582	9.184	569.299	9.184	0.526		9.184	192	9.184	193.835	9.184	-0.132		4.592	4551	4.592	4381.27	4.592	2.516								9.184	0.0582									9.184	0									4.592	0
9.192	518	9.192	567.829	9.192	-2.185		9.192	184	9.192	193.358	9.192	-0.686		4.596	4474	4.596	4333.17	4.596	2.105								9.192	0.0518									9.192	0									4.596	0
9.2	562	9.2	566.363	9.2	-0.184		9.2	212	9.2	192.883	9.2	1.307		4.6	4396	4.6	4285.6	4.6	1.665								9.2	0.0562									9.2	0									4.6	0
9.208	573	9.208	564.901	9.208	0.338		9.208	201	9.208	192.41	9.208	0.603		4.604	4492	4.604	4238.56	4.604	3.781								9.208	0.0573									9.208	0									4.604	0
9.216	524	9.216	563.443	9.216	-1.72		9.216	196	9.216	191.939	9.216	0.289		4.608	4434	4.608	4192.04	4.608	3.634								9.216	0.0524									9.216	0									4.608	0
9.224	560	9.224	561.99	9.224	-0.084		9.224	178	9.224	191.469	9.224	-1.004		4.612	4318	4.612	4146.02	4.612	2.617								9.224	0.056									9.224	0									4.612	0
9.232	542	9.232	560.541	9.232	-0.795		9.232	207	9.232	191.001	9.232	1.107		4.616	4236	4.616	4100.51	4.616	2.082								9.232	0.0542									9.232	0									4.616	0
9.24	529	9.24	559.096	9.24	-1.306		9.24	204	9.24	190.535	9.24	0.938		4.62	4306	4.62	4055.5	4.62	3.817								9.24	0.0529									9.24	0									4.62	0
9.248	557	9.248	557.656	9.248	-0.028		9.248	208	9.248	190.07	9.248	1.237		4.624	4330	4.624	4010.99	4.624	4.848								9.248	0.0557									9.248	0									4.624	0
9.256	528	9.256	556.219	9.256	-1.226		9.256	189	9.256	189.607	9.256	-0.044		4.628	4160	4.628	3966.96	4.628	2.993								9.256	0.0528									9.256	0									4.628	0
9.264	539	9.264	554.787	9.264	-0.679		9.264	191	9.264	189.146	9.264	0.133		4.632	4142	4.632	3923.42	4.632	3.396								9.264	0.0539									9.264	0									4.632	0
9.272	527	9.272	553.359	9.272	-1.146		9.272	188	9.272	188.686	9.272	-0.05		4.636	3960	4.636	3880.36	4.636	1.266								9.272	0.0527									9.272	0									4.636	0
9.28	560	9.28	551.935	9.28	0.34		9.28	169	9.28	188.228	9.28	-1.47		4.64	3934	4.64	3837.77	4.64	1.534								9.28	0.056									9.28	0									4.64	0
9.288	568	9.288	550.515	9.288	0.732		9.288	176	9.288	187.772	9.288	-0.882		4.644	3901	4.644	3795.65	4.644	1.687								9.288	0.0568									9.288	0									4.644	0
9.296	537	9.296	549.099	9.296	-0.521		9.296	182	9.296	187.317	9.296	-0.392		4.648	3886	4.648	3753.99	4.648	2.118								9.296	0.0537									9.296	0									4.648	0
9.304	538	9.304	547.687	9.304	-0.417		9.304	178	9.304	186.864	9.304	-0.661		4.652	3815	4.652	3712.79	4.652	1.655								9.304	0.0538									9.304	0									4.652	0
9.312	545	9.312	546.28	9.312	-0.055		9.312	202	9.312	186.412	9.312	1.091		4.656	3762	4.656	3672.04	4.656	1.467								9.312	0.0545									9.312	0									4.656	0
9.32	538	9.32	544.876	9.32	-0.296		9.32	197	9.32	185.962	9.32	0.782		4.66	3692	4.66	3631.74	4.66	0.992								9.32	0.0538									9.32	0									4.66	0
9.328	543	9.328	543.477	9.328	-0.02		9.328	182	9.328	185.513	9.328	-0.259		4.664	3756	4.664	3591.88	4.664	2.678								9.328	0.0543									9.328	0									4.664	0
9.336	509	9.336	542.081	9.336	-1.463		9.336	192	9.336	185.066	9.336	0.498		4.668	3648	4.668	3552.46	4.668	1.582								9.336	0.0509									9.336	0									4.668	0
9.344	498	9.344	540.69	9.344	-1.909		9.344	179	9.344	184.621	9.344	-0.418		4.672	3581	4.672	3513.48	4.672	1.128								9.344	0.0498									9.344	0									4.672	0
9.352	526	9.352	539.303	9.352	-0.579		9.352	182	9.352	184.177	9.352	-0.16		4.676	3488	4.676	3474.92	4.676	0.221								9.352	0.0526									9.352	0									4.676	0
9.36	549	9.36	537.919	9.36	0.472		9.36	194	9.36	183.735	9.36	0.733		4.68	3548	4.68	3436.78	4.68	1.867								9.36	0.0549									9.36	0									4.68	0
9.368	517	9.368	536.54	9.368	-0.858		9.368	196	9.368	183.294	9.368	0.903		4.684	3633	4.684	3399.07	4.684	3.881								9.368	0.0517									9.368	0									4.684	0
9.376	506	9.376	535.164	9.376	-1.294		9.376	186	9.376	182.854	9.376	0.229		4.688	3368	4.688	3361.77	4.688	0.107								9.376	0.0506									9.376	0									4.688	0
9.384	473	9.384	533.793	9.384	-2.789		9.384	184	9.384	182.416	9.384	0.116		4.692	3403	4.692	3324.88	4.692	1.339								9.384	0.0473									9.384	0									4.692	0
9.392	517	9.392	532.425	9.392	-0.677		9.392	186	9.392	181.98	9.392	0.293		4.696	3362	4.696	3288.39	4.696	1.269								9.392	0.0517									9.392	0									4.696	0
9.4	545	9.4	531.061	9.4	0.596		9.4	176	9.4	181.545	9.4	-0.416		4.7	3357	4.7	3252.31	4.7	1.807								9.4	0.0545									9.4	0									4.7	0
9.408	519	9.408	529.701	9.408	-0.469		9.408	198	9.408	181.112	9.408	1.194		4.704	3360	4.704	3216.62	4.704	2.474								9.408	0.0519									9.408	0									4.704	0
9.416	482	9.416	528.345	9.416	-2.107		9.416	194	9.416	180.68	9.416	0.951		4.708	3289	4.708	3181.33	4.708	1.878								9.416	0.0482									9.416	0									4.708	0
9.424	496	9.424	526.993	9.424	-1.389		9.424	177	9.424	180.249	9.424	-0.243		4.712	3155	4.712	3146.42	4.712	0.153								9.424	0.0496									9.424	0									4.712	0
9.432	542	9.432	525.645	9.432	0.701		9.432	183	9.432	179.82	9.432	0.234		4.716	3315	4.716	3111.89	4.716	3.528								9.432	0.0542									9.432	0									4.716	0
9.44	517	9.44	524.301	9.44	-0.32		9.44	186	9.44	179.392	9.44	0.482		4.72	3172	4.72	3077.75	4.72	1.673								9.44	0.0517									9.44	0									4.72	0
9.448	526	9.448	522.96	9.448	0.132		9.448	179	9.448	178.966	9.448	0.003		4.724	3099	4.724	3043.98	4.724	0.988								9.448	0.0526									9.448	0									4.724	0
9.456	534	9.456	521.623	9.456	0.535		9.456	185	9.456	178.541	9.456	0.472		4.728	3087	4.728	3010.58	4.728	1.375								9.456	0.0534									9.456	0									4.728	0
9.464	489	9.464	520.29	9.464	-1.412		9.464	167	9.464	178.118	9.464	-0.855		4.732	3146	4.732	2977.55	4.732	3.003								9.464	0.0489									9.464	0									4.732	0
9.472	513	9.472	518.961	9.472	-0.263		9.472	186	9.472	177.696	9.472	0.606		4.736	2976	4.736	2944.88	4.736	0.57								9.472	0.0513									9.472	0									4.736	0
9.48	531	9.48	517.636	9.48	0.579		9.48	173	9.48	177.275	9.48	-0.323		4.74	3019	4.74	2912.57	4.74	1.937								9.48	0.0531									9.48	0									4.74	0
9.488	466	9.488	516.314	9.488	-2.326		9.488	167	9.488	176.856	9.488	-0.758		4.744	2932	4.744	2880.62	4.744	0.949								9.488	0.0466									9.488	0									4.744	0
9.496	490	9.496	514.996	9.496	-1.127		9.496	199	9.496	176.438	9.496	1.591		4.748	2987	4.748	2849.02	4.748	2.525								9.496	0.049									9.496	0									4.748	0
9.504	468	9.504	513.682	9.504	-2.107		9.504	188	9.504	176.021	9.504	0.869		4.752	2920	4.752	2817.76	4.752	1.892								9.504	0.0468									9.504	0									4.752	0
9.512	479	9.512	512.371	9.512	-1.522		9.512	182	9.512	175.606	9.512	0.471		4.756	2782	4.756	2786.85	4.756	-0.092								9.512	0.0479									9.512	0									4.756	0
9.52	490	9.52	511.065	9.52	-0.95		9.52	171	9.52	175.192	9.52	-0.319		4.76	2791	4.76	2756.28	4.76	0.657								9.52	0.049									9.52	0									4.76	0
9.528	485	9.528	509.762	9.528	-1.122		9.528	159	9.528	174.78	9.528	-1.244		4.764	2648	4.764	2726.04	4.764	-1.517								9.528	0.0485									9.528	0									4.764	0
9.536	463	9.536	508.462	9.536	-2.108		9.536	157	9.536	174.369	9.536	-1.377		4.768	2722	4.768	2696.13	4.768	0.496								9.536	0.0463									9.536	0									4.768	0
9.544	500	9.544	507.167	9.544	-0.32		9.544	196	9.544	173.959	9.544	1.566		4.772	2719	4.772	2666.56	4.772	1.006								9.544	0.05									9.544	0									4.772	0
9.552	493	9.552	505.875	9.552	-0.579		9.552	174	9.552	173.55	9.552	0.034		4.776	2733	4.776	2637.31	4.776	1.83								9.552	0.0493									9.552	0									4.776	0
9.56	485	9.56	504.586	9.56	-0.888		9.56	193	9.56	173.143	9.56	1.422		4.78	2602	4.78	2608.38	4.78	-0.125								9.56	0.0485									9.56	0									4.78	0
9.568	541	9.568	503.301	9.568	1.618		9.568	171	9.568	172.737	9.568	-0.132		4.784	2598	4.784	2579.77	4.784	0.358								9.568	0.0541									9.568	0									4.784	0
9.576	462	9.576	502.02	9.576	-1.858		9.576	169	9.576	172.333	9.576	-0.255		4.788	2587	4.788	2551.47	4.788	0.699								9.576	0.0462									9.576	0									4.788	0
9.584	483	9.584	500.743	9.584	-0.806		9.584	169	9.584	171.929	9.584	-0.224		4.792	2526	4.792	2523.48	4.792	0.05								9.584	0.0483									9.584	0									4.792	0
9.592	468	9.592	499.469	9.592	-1.452		9.592	178	9.592	171.527	9.592	0.482		4.796	2427	4.796	2495.81	4.796	-1.397								9.592	0.0468									9.592	0									4.796	0
9.6	471	9.6	498.198	9.6	-1.251		9.6	185	9.6	171.127	9.6	1.014		4.8	2442	4.8	2468.43	4.8	-0.535								9.6	0.0471									9.6	0									4.8	0
9.608	498	9.608	496.932	9.608	0.048		9.608	183	9.608	170.727	9.608	0.902		4.804	2408	4.804	2441.36	4.804	-0.68								9.608	0.0498									9.608	0									4.804	0
9.616	501	9.616	495.668	9.616	0.238		9.616	166	9.616	170.329	9.616	-0.334		4.808	2426	4.808	2414.58	4.808	0.232								9.616	0.0501									9.616	0									4.808	0
9.624	442	9.624	494.409	9.624	-2.487		9.624	169	9.624	169.932	9.624	-0.071		4.812	2419	4.812	2388.1	4.812	0.628								9.624	0.0442									9.624	0									4.812	0
9.632	485	9.632	493.152	9.632	-0.369		9.632	190	9.632	169.536	9.632	1.477		4.816	2414	4.816	2361.91	4.816	1.06								9.632	0.0485									9.632	0									4.816	0
9.64	457	9.64	491.9	9.64	-1.629		9.64	169	9.64	169.142	9.64	-0.011		4.82	2240	4.82	2336.01	4.82	-2.029								9.64	0.0457									9.64	0									4.82	0
9.648	460	9.648	490.65	9.648	-1.426		9.648	189	9.648	168.749	9.648	1.465		4.824	2269	4.824	2310.39	4.824	-0.869								9.648	0.046									9.648	0									4.824	0
9.656	501	9.656	489.405	9.656	0.517		9.656	156	9.656	168.357	9.656	-0.983		4.828	2312	4.828	2285.05	4.828	0.56								9.656	0.0501									9.656	0									4.828	0
9.664	477	9.664	488.163	9.664	-0.51		9.664	167	9.664	167.966	9.664	-0.074		4.832	2141	4.832	2259.99	4.832	-2.572								9.664	0.0477									9.664	0									4.832	0
9.672	488	9.672	486.924	9.672	0.049		9.672	166	9.672	167.577	9.672	-0.122		4.836	2240	4.836	2235.21	4.836	0.101								9.672	0.0488									9.672	0									4.836	0
9.68	468	9.68	485.688	9.68	-0.816		9.68	174	9.68	167.188	9.68	0.513		4.84	2151	4.84	2210.7	4.84	-1.287								9.68	0.0468									9.68	0									4.84	0
9.688	446	9.688	484.457	9.688	-1.817		9.688	141	9.688	166.801	9.688	-2.158		4.844	2142	4.844	2186.46	4.844	-0.961								9.688	0.0446									9.688	0									4.844	0
9.696	461	9.696	483.228	9.696	-1.033		9.696	174	9.696	166.415	9.696	0.572		4.848	2082	4.848	2162.49	4.848	-1.764								9.696	0.0461									9.696	0									4.848	0
9.704	493	9.704	482.003	9.704	0.494		9.704	179	9.704	166.031	9.704	0.964		4.852	2119	4.852	2138.77	4.852	-0.43								9.704	0.0493									9.704	0									4.852	0
9.712	496	9.712	480.782	9.712	0.682		9.712	159	9.712	165.647	9.712	-0.524		4.856	2083	4.856	2115.32	4.856	-0.708								9.712	0.0496									9.712	0									4.856	0
9.72	452	9.72	479.563	9.72	-1.294		9.72	164	9.72	165.265	9.72	-0.098		4.86	2022	4.86	2092.13	4.86	-1.56								9.72	0.0452									9.72	0									4.86	0
9.728	449	9.728	478.349	9.728	-1.382		9.728	161	9.728	164.883	9.728	-0.304		4.864	1890	4.864	2069.19	4.864	-4.122								9.728	0.0449									9.728	0									4.864	0
9.736	465	9.736	477.137	9.736	-0.562		9.736	159	9.736	164.503	9.736	-0.434		4.868	2084	4.868	2046.51	4.868	0.821								9.736	0.0465									9.736	0									4.868	0
9.744	499	9.744	475.929	9.744	1.031		9.744	155	9.744	164.124	9.744	-0.728		4.872	1957	4.872	2024.07	4.872	-1.516								9.744	0.0499									9.744	0									4.872	0
9.752	441	9.752	474.724	9.752	-1.602		9.752	153	9.752	163.747	9.752	-0.863		4.876	1867	4.876	2001.88	4.876	-3.122								9.752	0.0441									9.752	0									4.876	0
9.76	426	9.76	473.523	9.76	-2.297		9.76	130	9.76	163.37	9.76	-2.905		4.88	1931	4.88	1979.93	4.88	-1.114								9.76	0.0426									9.76	0									4.88	0
9.768	432	9.768	472.325	9.768	-1.936		9.768	167	9.768	162.995	9.768	0.308		4.884	1885	4.884	1958.23	4.884	-1.687								9.768	0.0432									9.768	0									4.884	0
9.776	468	9.776	471.13	9.776	-0.144		9.776	162	9.776	162.62	9.776	-0.048		4.888	1827	4.888	1936.76	4.888	-2.568								9.776	0.0468									9.776	0									4.888	0
9.784	441	9.784	469.939	9.784	-1.375		9.784	162	9.784	162.247	9.784	-0.019		4.892	1863	4.892	1915.53	4.892	-1.217								9.784	0.0441									9.784	0									4.892	0
9.792	445	9.792	468.75	9.792	-1.123		9.792	141	9.792	161.875	9.792	-1.746		4.896	1773	4.896	1894.53	4.896	-2.886								9.792	0.0445									9.792	0									4.896	0
9.8	439	9.8	467.566	9.8	-1.36		9.8	172	9.8	161.504	9.8	0.796		4.9	1814	4.9	1873.77	4.9	-1.403								9.8	0.0439									9.8	0									4.9	0
9.808	439	9.808	466.384	9.808	-1.304		9.808	161	9.808	161.135	9.808	-0.011		4.904	1798	4.904	1853.23	4.904	-1.302								9.808	0.0439									9.808	0									4.904	0
9.816	471	9.816	465.206	9.816	0.266		9.816	165	9.816	160.766	9.816	0.328		4.908	1751	4.908	1832.92	4.908	-1.958								9.816	0.0471									9.816	0									4.908	0
9.824	425	9.824	464.031	9.824	-1.889		9.824	163	9.824	160.398	9.824	0.203		4.912	1755	4.912	1812.83	4.912	-1.38								9.824	0.0425									9.824	0									4.912	0
9.832	404	9.832	462.859	9.832	-2.921		9.832	166	9.832	160.032	9.832	0.46		4.916	1679	4.916	1792.96	4.916	-2.781								9.832	0.0404									9.832	0									4.916	0
9.84	435	9.84	461.69	9.84	-1.277		9.84	180	9.84	159.666	9.84	1.507		4.92	1719	4.92	1773.31	4.92	-1.31								9.84	0.0435									9.84	0									4.92	0
9.848	420	9.848	460.525	9.848	-1.973		9.848	142	9.848	159.302	9.848	-1.442		4.924	1618	4.924	1753.87	4.924	-3.378								9.848	0.042									9.848	0									4.924	0
9.856	455	9.856	459.362	9.856	-0.204		9.856	168	9.856	158.939	9.856	0.695		4.928	1675	4.928	1734.65	4.928	-1.458								9.856	0.0455									9.856	0									4.928	0
9.864	436	9.864	458.203	9.864	-1.061		9.864	177	9.864	158.577	9.864	1.377		4.932	1587	4.932	1715.64	4.932	-3.229								9.864	0.0436									9.864	0									4.932	0
9.872	464	9.872	457.048	9.872	0.322		9.872	156	9.872	158.215	9.872	-0.176		4.936	1610	4.936	1696.84	4.936	-2.164								9.872	0.0464									9.872	0									4.936	0
9.88	400	9.88	455.895	9.88	-2.788		9.88	165	9.88	157.855	9.88	0.553		4.94	1613	4.94	1678.25	4.94	-1.625								9.88	0.04									9.88	0									4.94	0
9.888	424	9.888	454.746	9.888	-1.49		9.888	157	9.888	157.496	9.888	-0.039		4.944	1610	4.944	1659.86	4.944	-1.243								9.888	0.0424									9.888	0									4.944	0
9.896	400	9.896	453.599	9.896	-2.673		9.896	165	9.896	157.139	9.896	0.608		4.948	1515	4.948	1641.67	4.948	-3.254								9.896	0.04									9.896	0									4.948	0
9.904	423	9.904	452.456	9.904	-1.429		9.904	148	9.904	156.782	9.904	-0.717		4.952	1535	4.952	1623.68	4.952	-2.264								9.904	0.0423									9.904	0									4.952	0
9.912	473	9.912	451.316	9.912	0.995		9.912	145	9.912	156.426	9.912	-0.942		4.956	1461	4.956	1605.89	4.956	-3.791								9.912	0.0473									9.912	0									4.956	0
9.92	421	9.92	450.179	9.92	-1.419		9.92	153	9.92	156.071	9.92	-0.247		4.96	1530	4.96	1588.3	4.96	-1.49								9.92	0.0421									9.92	0									4.96	0
9.928	419	9.928	449.045	9.928	-1.464		9.928	161	9.928	155.717	9.928	0.414		4.964	1421	4.964	1570.9	4.964	-3.976								9.928	0.0419									9.928	0									4.964	0
9.936	423	9.936	447.915	9.936	-1.209		9.936	163	9.936	155.365	9.936	0.594		4.968	1496	4.968	1553.69	4.968	-1.491								9.936	0.0423									9.936	0									4.968	0
9.944	392	9.944	446.787	9.944	-2.76		9.944	143	9.944	155.013	9.944	-0.998		4.972	1412	4.972	1536.67	4.972	-3.318								9.944	0.0392									9.944	0									4.972	0
9.952	403	9.952	445.662	9.952	-2.12		9.952	147	9.952	154.662	9.952	-0.628		4.976	1506	4.976	1519.83	4.976	-0.356								9.952	0.0403									9.952	0									4.976	0
9.96	443	9.96	444.541	9.96	-0.073		9.96	165	9.96	154.313	9.96	0.827		4.98	1387	4.98	1503.18	4.98	-3.12								9.96	0.0443									9.96	0									4.98	0
9.968	404	9.968	443.423	9.968	-1.957		9.968	162	9.968	153.964	9.968	0.628		4.984	1361	4.984	1486.72	4.984	-3.408								9.968	0.0404									9.968	0									4.984	0
9.976	422	9.976	442.307	9.976	-0.986		9.976	157	9.976	153.616	9.976	0.268		4.988	1402	4.988	1470.43	4.988	-1.828								9.976	0.0422									9.976	0									4.988	0
9.984	396	9.984	441.195	9.984	-2.265		9.984	145	9.984	153.27	9.984	-0.682		4.992	1379	4.992	1454.33	4.992	-2.028								9.984	0.0396									9.984	0									4.992	0
9.992	426	9.992	440.086	9.992	-0.681		9.992	147	9.992	152.924	9.992	-0.485		4.996	1268	4.996	1438.4	4.996	-4.785								9.992	0.0426									9.992	0									4.996	0
10	416	10	438.979	10	-1.124		10	161	10	152.579	10	0.66		5	1250	5	1422.64	5	-4.883								10	0.0416									10	0									5	0
10.008	395	10.008	437.876	10.008	-2.152		10.008	160	10.008	152.236	10.008	0.61		5.004	1319	5.004	1407.06	5.004	-2.425								10.008	0.0395									10.008	0									5.004	0
10.016	400	10.016	436.776	10.016	-1.834		10.016	164	10.016	151.893	10.016	0.94		5.008	1342	5.008	1391.65	5.008	-1.355								10.016	0.04									10.016	0									5.008	0
10.024	375	10.024	435.679	10.024	-3.125		10.024	130	10.024	151.551	10.024	-1.876		5.012	1199	5.012	1376.41	5.012	-5.124								10.024	0.0375									10.024	0									5.012	0
10.032	396	10.032	434.585	10.032	-1.934		10.032	168	10.032	151.211	10.032	1.288		5.016	1200	5.016	1361.34	5.016	-4.658								10.032	0.0396									10.032	0									5.016	0
10.04	411	10.04	433.493	10.04	-1.107		10.04	165	10.04	150.871	10.04	1.093		5.02	1218	5.02	1346.43	5.02	-3.68								10.04	0.0411									10.04	0									5.02	0
10.048	406	10.048	432.405	10.048	-1.307		10.048	162	10.048	150.532	10.048	0.896		5.024	1243	5.024	1331.69	5.024	-2.516								10.048	0.0406									10.048	0									5.024	0
10.056	421	10.056	431.32	10.056	-0.502		10.056	154	10.056	150.194	10.056	0.305		5.028	1277	5.028	1317.11	5.028	-1.122								10.056	0.0421									10.056	0									5.028	0
10.064	418	10.064	430.237	10.064	-0.597		10.064	159	10.064	149.857	10.064	0.721		5.032	1218	5.032	1302.69	5.032	-2.427								10.064	0.0418									10.064	0									5.032	0
10.072	394	10.072	429.158	10.072	-1.767		10.072	126	10.072	149.521	10.072	-2.079		5.036	1208	5.036	1288.43	5.036	-2.314								10.072	0.0394									10.072	0									5.036	0
10.08	414	10.08	428.081	10.08	-0.69		10.08	155	10.08	149.186	10.08	0.464		5.04	1184	5.04	1274.32	5.04	-2.625								10.08	0.0414									10.08	0									5.04	0
10.088	422	10.088	427.008	10.088	-0.243		10.088	139	10.088	148.852	10.088	-0.83		5.044	1080	5.044	1260.37	5.044	-5.488								10.088	0.0422									10.088	0									5.044	0
10.096	406	10.096	425.937	10.096	-0.987		10.096	166	10.096	148.519	10.096	1.349		5.048	1151	5.048	1246.57	5.048	-2.817								10.096	0.0406									10.096	0									5.048	0
10.104	417	10.104	424.869	10.104	-0.384		10.104	161	10.104	148.187	10.104	1.004		5.052	1179	5.052	1232.93	5.052	-1.571								10.104	0.0417									10.104	0									5.052	0
10.112	381	10.112	423.804	10.112	-2.187		10.112	143	10.112	147.856	10.112	-0.403		5.056	1117	5.056	1219.43	5.056	-3.065								10.112	0.0381									10.112	0									5.056	0
10.12	435	10.12	422.742	10.12	0.586		10.12	144	10.12	147.526	10.12	-0.292		5.06	1124	5.06	1206.08	5.06	-2.448								10.12	0.0435									10.12	0									5.06	0
10.128	391	10.128	421.683	10.128	-1.548		10.128	177	10.128	147.196	10.128	2.228		5.064	1135	5.064	1192.88	5.064	-1.718								10.128	0.0391									10.128	0									5.064	0
10.136	402	10.136	420.627	10.136	-0.927		10.136	135	10.136	146.868	10.136	-1.014		5.068	1079	5.068	1179.83	5.068	-3.069								10.136	0.0402									10.136	0									5.068	0
10.144	375	10.144	419.573	10.144	-2.296		10.144	139	10.144	146.54	10.144	-0.635		5.072	1064	5.072	1166.91	5.072	-3.155								10.144	0.0375									10.144	0									5.072	0
10.152	412	10.152	418.523	10.152	-0.321		10.152	142	10.152	146.214	10.152	-0.351		5.076	990	5.076	1154.14	5.076	-5.212								10.152	0.0412									10.152	0									5.076	0
10.16	407	10.16	417.475	10.16	-0.518		10.16	120	10.16	145.888	10.16	-2.344		5.08	1037	5.08	1141.51	5.08	-3.246								10.16	0.0407									10.16	0									5.08	0
10.168	363	10.168	416.43	10.168	-2.797		10.168	133	10.168	145.563	10.168	-1.081		5.084	1067	5.084	1129.02	5.084	-1.899								10.168	0.0363									10.168	0									5.084	0
10.176	402	10.176	415.388	10.176	-0.666		10.176	150	10.176	145.239	10.176	0.386		5.088	1011	5.088	1116.67	5.088	-3.323								10.176	0.0402									10.176	0									5.088	0
10.184	384	10.184	414.349	10.184	-1.545		10.184	121	10.184	144.916	10.184	-2.156		5.092	1009	5.092	1104.45	5.092	-3.005								10.184	0.0384									10.184	0									5.092	0
10.192	395	10.192	413.312	10.192	-0.919		10.192	147	10.192	144.594	10.192	0.197		5.096	1014	5.096	1092.37	5.096	-2.461								10.192	0.0395									10.192	0									5.096	0
10.2	376	10.2	412.278	10.2	-1.866		10.2	144	10.2	144.273	10.2	-0.023		5.1	991	5.1	1080.41	5.1	-2.837								10.2	0.0376									10.2	0									5.1	0
10.208	368	10.208	411.247	10.208	-2.248		10.208	144	10.208	143.953	10.208	0.004		5.104	933	5.104	1068.6	5.104	-4.434								10.208	0.0368									10.208	0									5.104	0
10.216	386	10.216	410.219	10.216	-1.23		10.216	119	10.216	143.633	10.216	-2.239		5.108	988	5.108	1056.9	5.108	-2.19								10.216	0.0386									10.216	0									5.108	0
10.224	388	10.224	409.194	10.224	-1.073		10.224	135	10.224	143.315	10.224	-0.71		5.112	968	5.112	1045.34	5.112	-2.483								10.224	0.0388									10.224	0									5.112	0
10.232	406	10.232	408.171	10.232	-0.107		10.232	144	10.232	142.997	10.232	0.083		5.116	953	5.116	1033.91	5.116	-2.618								10.232	0.0406									10.232	0									5.116	0
10.24	401	10.24	407.151	10.24	-0.306		10.24	148	10.24	142.68	10.24	0.434		5.12	967	5.12	1022.6	5.12	-1.786								10.24	0.0401									10.24	0									5.12	0
10.248	409	10.248	406.134	10.248	0.141		10.248	141	10.248	142.364	10.248	-0.114		5.124	927	5.124	1011.41	5.124	-2.77								10.248	0.0409									10.248	0									5.124	0
10.256	359	10.256	405.12	10.256	-2.427		10.256	147	10.256	142.049	10.256	0.406		5.128	943	5.128	1000.35	5.128	-1.866								10.256	0.0359									10.256	0									5.128	0
10.264	345	10.264	404.108	10.264	-3.173		10.264	128	10.264	141.735	10.264	-1.205		5.132	885	5.132	989.414	5.132	-3.506								10.264	0.0345									10.264	0									5.132	0
[truncated: 4,966 more rows]

## Sheet: Extended Data Fig. 1. f
	hydroxyl radical assay (HPF assay)
[truncated: 14 more rows]

## Sheet: Extended Data Fig. 1. g-i
		Photocatalytic amino acid oxidation in oxidative quenching cycle. (See supplementary information 4-1)
[truncated: 1,055 more rows]

[truncated: 25 more sheets: Extended Data Fig. 1. j, Extended Data Fig. 2. e, Extended Data Fig. 2. g, Fig. 2. b, Fig. 2. d, Fig. 2. f-No BTP, Fig. 2. f-10uM BTP, Fig. 2. f-20uM BTP, Fig. 2. g, Fig. 2. h, Fig. 3, Extended Data Fig. 4-6, Fig. 3. a-c, Fig. 3. e, Fig. 3. f, Extended Data Fig. 4. b, Extended Data Fig. 5, Extended Data Fig. 6, Fig. 4. c, Fig. 5. b, Fig. 5. e …]
