# Supplementary material for: Oxidative photocatalysis on membranes triggers non-canonical pyroptosis
Source: Research Square preprint supplement (doi:10.21203/rs.3.rs-3126446/v1), 2023-07-13
Supplement: Supplementary file 1 [file eeb476ab0948b11e0e81dd83.pdf]

## Reporting Summary

Nature Portfolio wishes to improve the reproducibility of the work that we publish. This form provides structure for consistency and transparency in reporting. For further information on Nature Portfolio policies, see our [Editorial Policies](#) and the [Editorial Policy Checklist](#).

### Statistics

For all statistical analyses, confirm that the following items are present in the figure legend, table legend, main text, or Methods section.

n/a | Confirmed

- The exact sample size ( $n$ ) for each experimental group/condition, given as a discrete number and unit of measurement
- A statement on whether measurements were taken from distinct samples or whether the same sample was measured repeatedly
- The statistical test(s) used AND whether they are one- or two-sided  
*Only common tests should be described solely by name; describe more complex techniques in the Methods section.*
- A description of all covariates tested
- A description of any assumptions or corrections, such as tests of normality and adjustment for multiple comparisons
- A full description of the statistical parameters including central tendency (e.g. means) or other basic estimates (e.g. regression coefficient) AND variation (e.g. standard deviation) or associated estimates of uncertainty (e.g. confidence intervals)
- For null hypothesis testing, the test statistic (e.g.  $F$ ,  $t$ ,  $r$ ) with confidence intervals, effect sizes, degrees of freedom and  $P$  value noted  
*Give  $P$  values as exact values whenever suitable.*
- For Bayesian analysis, information on the choice of priors and Markov chain Monte Carlo settings
- For hierarchical and complex designs, identification of the appropriate level for tests and full reporting of outcomes
- Estimates of effect sizes (e.g. Cohen's  $d$ , Pearson's  $r$ ), indicating how they were calculated

*Our web collection on [statistics for biologists](#) contains articles on many of the points above.*

### Software and code

Policy information about [availability of computer code](#)

Data collection

ZEN software (ver. 3.0) from Carl Zeiss was utilized for collection of confocal and live SIM imaging.  
LC-MS/MS data acquisition software Xcalibur (ver. 4.3) from ThermoFisher Scientific was utilized.

## Data analysis

For microscopy Imaging, Carl Zeiss ZEN 3.0 blue edition was used for analyzing and editing images.

All MS/MS samples were analysed using Sequest Sorcerer platform (Sagen-N Research, San Jose, CA, USA). Sequest was set up to search the Homo sapiens (20612 entries, UniProt (<http://www.uniprot.org>)). Scaffold Q+ (version 5.1.0, Proteome Software Inc., Portland, OR) was used to validate MS/MS based peptide and protein identifications. A peptide of greater than 99% probability for achieving FDR lower than 1.0% based on Scaffold Local FDR algorithm was accepted as a true identification. A protein identification of greater than 14.0% probability to achieve an FDR less than 1.0% and containing 2 or more identified peptides was accepted. Protein Prophet algorithm<sup>57</sup> was used to calculate the protein probabilities. The GO annotations for the proteins were retrieved from NCBI (downloaded Feb 11, 2021).

Normalization was performed iteratively on intensities while medians being used for averaging. Of 5173389 spectra in the experiment at the given thresholds, 2120870 (41%) were included in quantification. A new distribution was created by Gaussian distribution with a downshift of 1.8 and width of 0.3 standard deviations. All processes were conducted using Perseus software platform from Max Planck Institute of Biochemistry.

The pre-determined significantly oxidized proteins based on their log<sub>2</sub>FC and log<sub>2</sub>P were analyzed by GONet, and oxidized proteome networks by functional association were determined by STRING and visualized by Gephi (ver. 0.9.2) or Cytoscape (ver. 3.9.1). Crystal structures of oxidized proteins containing oxidatively modified Met residues were illustrated by PyMOL2 (2.5.2). Representative crystal structures were retrieved from reported literature at Protein Data Bank (PDB). Further detailed methods are described in Methods section of manuscript.

For editing raw data, OriginPro 2017, Microsoft office 2017 were used.

The FACS data was processed by the CytExpert software (ver. 2.4.0.28)

For manuscripts utilizing custom algorithms or software that are central to the research but not yet described in published literature, software must be made available to editors and reviewers. We strongly encourage code deposition in a community repository (e.g. GitHub). See the Nature Portfolio [guidelines for submitting code & software](#) for further information.

## Data

Policy information about [availability of data](#)

All manuscripts must include a [data availability statement](#). This statement should provide the following information, where applicable:

- Accession codes, unique identifiers, or web links for publicly available datasets
- A description of any restrictions on data availability
- For clinical datasets or third party data, please ensure that the statement adheres to our [policy](#)

The authors declare that the data supporting the findings of this study are available within the article and its Supplementary Information. The protein information utilized in this study is available from the Homo sapiens protein sequence database (20612 entries, UniProt (<http://www.uniprot.org>)). Raw mass spectrometry dataset used for oxidised proteome analysis have been deposited to the ProteomeXchange Consortium via the PRIDE partner repository with the dataset identifier PXD038746 and 10.6019/PXD038746. Extra data are available from the corresponding author upon reasonable request. The source data underlying Fig. 1. c-f; Fig. 2. b, d, f-h; Fig. 3. a-c, e, f; Fig. 4. b, e, g; Extended Data Fig. 1. a, b, e-j; Extended Data Fig. 2. e, g; Extended Data Fig. 4. b; Extended Data Fig. 5; Extended Data Fig. 6; Extended Data Fig. 7. c; Extended Data Fig. 8. b, c, and e are provided as a Source Data file.

## Human research participants

Policy information about [studies involving human research participants and Sex and Gender in Research](#).

### Reporting on sex and gender

*Use the terms sex (biological attribute) and gender (shaped by social and cultural circumstances) carefully in order to avoid confusing both terms. Indicate if findings apply to only one sex or gender; describe whether sex and gender were considered in study design whether sex and/or gender was determined based on self-reporting or assigned and methods used. Provide in the source data disaggregated sex and gender data where this information has been collected, and consent has been obtained for sharing of individual-level data; provide overall numbers in this Reporting Summary. Please state if this information has not been collected. Report sex- and gender-based analyses where performed, justify reasons for lack of sex- and gender-based analysis.*

### Population characteristics

*Describe the covariate-relevant population characteristics of the human research participants (e.g. age, genotypic information, past and current diagnosis and treatment categories). If you filled out the behavioural & social sciences study design questions and have nothing to add here, write "See above."*

### Recruitment

*Describe how participants were recruited. Outline any potential self-selection bias or other biases that may be present and how these are likely to impact results.*

### Ethics oversight

*Identify the organization(s) that approved the study protocol.*

Note that full information on the approval of the study protocol must also be provided in the manuscript.

## Field-specific reporting

Please select the one below that is the best fit for your research. If you are not sure, read the appropriate sections before making your selection.

- Life sciences     Behavioural & social sciences     Ecological, evolutionary & environmental sciences

For a reference copy of the document with all sections, see [nature.com/documents/nr-reporting-summary-flat.pdf](https://www.nature.com/documents/nr-reporting-summary-flat.pdf)

# Life sciences study design

All studies must disclose on these points even when the disclosure is negative.

|                 |                                                                                                                                                                                                                                                                                                                                                                                                                       |
|-----------------|-----------------------------------------------------------------------------------------------------------------------------------------------------------------------------------------------------------------------------------------------------------------------------------------------------------------------------------------------------------------------------------------------------------------------|
| Sample size     | The calculation for sample size was not performed. For all experiments, sample sizes were determined based on similar experiments described in published articles.                                                                                                                                                                                                                                                    |
| Data exclusions | No data were excluded from the analyses                                                                                                                                                                                                                                                                                                                                                                               |
| Replication     | All reported results were triplicated independently. Each attempts showed similar results.                                                                                                                                                                                                                                                                                                                            |
| Randomization   | For the experiments using cell lines, we randomly allocated cells cultured in the same condition into experimental sets, including positive/negative control. In imaging analysis, we randomly selected target at least three individual cells, then we choosed the best images.                                                                                                                                      |
| Blinding        | For cell-based experiments except for LC-MS/MS, the perfect blinding could not be achieved because the allocating of cell groups, data collection, and data analysis were performed by the same researchers. For LC-MS/MS experiment, the investigator performed the experiment with blinded samples labeled 1-1, 1-2, ..., 4-3 (corresponding to triplicated samples for BTP-/hv-, BTP+/hv-, BTP-/hv+, and BTP+/hv+) |

## Reporting for specific materials, systems and methods

We require information from authors about some types of materials, experimental systems and methods used in many studies. Here, indicate whether each material, system or method listed is relevant to your study. If you are not sure if a list item applies to your research, read the appropriate section before selecting a response.

### Materials & experimental systems

### Methods

| n/a                                 | Involved in the study                                     |
|-------------------------------------|-----------------------------------------------------------|
| <input type="checkbox"/>            | <input checked="" type="checkbox"/> Antibodies            |
| <input type="checkbox"/>            | <input checked="" type="checkbox"/> Eukaryotic cell lines |
| <input checked="" type="checkbox"/> | <input type="checkbox"/> Palaeontology and archaeology    |
| <input checked="" type="checkbox"/> | <input type="checkbox"/> Animals and other organisms      |
| <input checked="" type="checkbox"/> | <input type="checkbox"/> Clinical data                    |
| <input checked="" type="checkbox"/> | <input type="checkbox"/> Dual use research of concern     |

| n/a                                 | Involved in the study                              |
|-------------------------------------|----------------------------------------------------|
| <input checked="" type="checkbox"/> | <input type="checkbox"/> ChIP-seq                  |
| <input type="checkbox"/>            | <input checked="" type="checkbox"/> Flow cytometry |
| <input checked="" type="checkbox"/> | <input type="checkbox"/> MRI-based neuroimaging    |

## Antibodies

### Antibodies used

Gasdermin D: NBP2-33422 (Novus Biologicals) WB - 1000:1  
 Caspase-1: ab207802 (Abcam) and PA5-29342 (Invitrogen) WB - 1000:1  
 Caspase-3: ab32351 (Abcam) WB - 1000:1  
 Caspase-4: A94799 (Antibodies) WB - 1000:1  
 Caspase-5: sc-393346 (Santa Cruz) WB - 500:1  
 IL-1beta: P420B (Invitrogen) WB - 1000:1  
 IL-18: PA5-79479 (Invitrogen) WB - 1000:1  
 Beta-actin: MA5-15739 (Invitrogen) WB - 1000:1  
 Anti-rabbit HRP: ab205718 (Abcam) WB - 3000:1  
 Anti-mouse HRP: 31430 (Invitrogen) WB - 5000:1

### Validation

All antibody were commercially available. The manufacturer provides its validation on their website.  
 Gasdermin D: [https://www.novusbio.com/products/gsdmdc1-antibody\\_nbp2-33422](https://www.novusbio.com/products/gsdmdc1-antibody_nbp2-33422)  
 Caspase-1: <https://www.abcam.com/caspase-1-antibody-epr19672-ab207802.html>  
 Caspase-1: <https://www.thermofisher.com/antibody/product/Caspase-1-Antibody-Polyclonal/PA5-29342>  
 Caspase-3: <https://www.abcam.com/caspase-3-antibody-e87-ab32351.html>  
 Caspase-4: <https://www.antibodies.com/caspase-4-p20-cleaved-gln81-antibody-a94799>  
 Caspase-5: <https://www.scbt.com/p/caspase-5-p20-antibody-h-2>  
 IL-1beta: <https://www.thermofisher.com/antibody/product/IL-1-beta-Antibody-Polyclonal/P420B>  
 IL-18: <https://www.thermofisher.com/antibody/product/IL-18-Antibody-Polyclonal/PA5-79479>  
 Beta-actin: <https://www.thermofisher.com/antibody/product/beta-Actin-Loading-Control-Antibody-clone-BA3R-Monoclonal/MA5-15739>  
 Anti-rabbit HRP: <https://www.abcam.com/goat-rabbit-igg-hl-hrp-ab205718.html>  
 Anti-mouse HRP: <https://www.thermofisher.com/antibody/product/Goat-anti-Mouse-IgG-H-L-Secondary-Antibody-Polyclonal/31430>

## Eukaryotic cell lines

Policy information about [cell lines and Sex and Gender in Research](#)

|                                                                      |                                                                                                                                                   |
|----------------------------------------------------------------------|---------------------------------------------------------------------------------------------------------------------------------------------------|
| Cell line source(s)                                                  | HeLa, Panc-1, and Miapaca-2: ATCC<br>WT and GSDMD KO iBMDMs were immortalized from mouse (James Vince Lab, WEHI)                                  |
| Authentication                                                       | commercial cell lines were authenticated by commercial vendors.<br>GSDMD KO was authenticated by western blot (supplementary information Fig. 10) |
| Mycoplasma contamination                                             | The cell lines were tested negative for mycoplasma contamination                                                                                  |
| Commonly misidentified lines<br>(See <a href="#">ICLAC</a> register) | None.                                                                                                                                             |

## Flow Cytometry

### Plots

Confirm that:

- The axis labels state the marker and fluorochrome used (e.g. CD4-FITC).
- The axis scales are clearly visible. Include numbers along axes only for bottom left plot of group (a 'group' is an analysis of identical markers).
- All plots are contour plots with outliers or pseudocolor plots.
- A numerical value for number of cells or percentage (with statistics) is provided.

### Methodology

|                           |                                                                                                                                                                                                                                                                                                                                                                                                                                                                                                                                                |
|---------------------------|------------------------------------------------------------------------------------------------------------------------------------------------------------------------------------------------------------------------------------------------------------------------------------------------------------------------------------------------------------------------------------------------------------------------------------------------------------------------------------------------------------------------------------------------|
| Sample preparation        | HeLa cells of 7–80% confluence in 6-well plate were treated with BTP (10 $\mu$ M) for 2 h and further incubated with Rhod-2 AM (3 $\mu$ M) and Ion K+ green-2 (40 $\mu$ M) for an hour. Then, the cells were irradiated with blue LED (450 nm, 10 J-cm <sup>2</sup> ). 2 hours after irradiation, the cells were detached using cell scraper and the fluorescence of cell suspension was detected using flow cytometry (CytoFLEX S, Beckman, USA). Further information is provided in the supporting information.                              |
| Instrument                | CytoFLEX S, Beckman, USA                                                                                                                                                                                                                                                                                                                                                                                                                                                                                                                       |
| Software                  | CytExpert software (ver. 2.4.0.28).                                                                                                                                                                                                                                                                                                                                                                                                                                                                                                            |
| Cell population abundance | The abundance of the HeLa cell population within post-sort fractions is 10000. We selected experimental viable cells of reasonable size (positive FSC, intensity < 40 X 10 <sup>5</sup> ) with internal complexity (positive SSC, intensity < 40 X 10 <sup>5</sup> ) except for cell debris. The purity of the samples is above 80%                                                                                                                                                                                                            |
| Gating strategy           | The cells were selected by the preliminary FSC-A/SSC-A gates. Cells with positive FSC and positive SSC are selected, and discarded signals from cells with extremely high SSC (> 40 X 10 <sup>5</sup> ) or FSC (> 40 X 10 <sup>5</sup> ). For both of the mitochondrial Ca <sup>2+</sup> assay (Rhod-2 assay) and intracellular K+ assay (ION K+ Green assay), we measured signals of dyes with Laser/filter combination of mCherry. We defined the cation-mobilized cells (BTP+/hv+) based on the histogram of control condition (BTP +/hv-). |

- Tick this box to confirm that a figure exemplifying the gating strategy is provided in the Supplementary Information.
